# Supplementary material for: The Polarity and Specificity of Antiviral T Lymphocyte Responses Determine Susceptibility to SARS-CoV-2 Infection in Patients with Cancer and Healthy Individuals
Source: Oxford University Press journal article supplement (doi:10.1158/2159-8290.cd-21-1441), 2022-02-18
Supplement: cd-21-1441_supplementary_tables_supps1-s14.xlsx [file cd-21-1441_supplementary_tables_supps1-s14.xlsx]

## Sheet: Table 1
Table 1. Efficacy of FDA/EMA -approved vaccines to elicit anti-wt versus mutRBD specific TH1/Tc1 responses: multivariate analyses.
Characteristic				PEPorf				PEPwtRBD				PEPmutRBD
				Univariable estimate [95% CI]	P value	Multivariable estimate [95% CI]	P.value	Univariable estimate [95% CI]	P value	Multivariable estimate [95% CI]	P.value	Univariable estimate [95% CI]	P value	Multivariable estimate [95% CI]	P.value
		n	%
Gender	Male	x	x	reference
	Female	x	x	-0.112 [-0.223;0.013]	0.049	-0.114 [-0.201;-0.012]	0.022	-0.037 [-0.115;0.027]	0.305	-0.038 [-0.106;0.037]	0.286	-0.094 [-0.191;0.007]	0.046	-0.098 [-0.196;0.007]	0.041
Age (years)				reference or continous??
				0.00006 [-0.004;0.004]	0.975	0.003 [-0.001;0.006]	0.18	-0.0003 [-0.003;0.002]	0.778	0.0005 [-0.002;0.003]	0.725	0.0003 [-0.003;0.004]	0.849	0.00009 [-0.004;0.004]	0.963
Sampling time				reference or continous??
	Median (range)	x	( - )	0.002 [0.001;0.003]	<0.001	-0.001 [-0.003;-0.0003]	0.020	0.0009 [0.0005;0.001]	<0.001	-0.0005 [-0.001;0.0004]	0.296	0.0005 [-0.00006;0.001]	0.063	0.0004 [-0.0008;0.002]	0.506
Covid history and vaccine rounds	reference?			reference
	No COVID-19 history ; 1 round			0.273 [0.151;0.373]	<0.001	0.332 [0.203;0.451]	<0.001	0.025 [-0.099;0.144]	0.680	0.065 [-0.058;0.2]	0.319	0.005 [-0.158;0.163]	0.95	-0.015 [-0.19;0.159]	0.861
	No COVID-19 history ; 2 rounds			0.507 [0.401;0.608]	<0.001	0.709 [0.523;0.916]	<0.001	0.176 [0.090;0.263]	<0.001	0.265 [0.091;0.425]	0.002	0.069 [-0.032;0.167]	0.213	0.01 [-0.22;0.242]	0.925
	Convalescent ; no round			0.416 [0.263;0.562]	<0.001	0.395 [0.219;0.566]	<0.001	0.02 [-0.086;0.136]	0.746	0.015 [-0.113;0.143]	0.811	-0.037 [-0.221;0.118]	0.640	-0.042 [-0.202;0.125]	0.601
	Convalescent ; 1 round			0.809 [0.64;0.967]	<0.001	0.883 [0.687;1.067]	<0.001	0.258 [0.115;0.375]	<0.001	0.307 [0.152;0.462]	<0.001	0.059 [-0.104;0.208]	0.484	0.03 [-0.157;0.233]	0.764
Cancer	Cancer-free	x	x	reference
	Haematologic malignancies	18	x	-0.235 [-0.54;0.063]	0.095	-0.391 [-0.665;-0.115]	0.004	-0.126 [-0.272;0.043]	0.126	-0.192 [-0.371;-0.003]	0.033	-0.062 [-0.274;0.139]	0.558	-0.05 [-0.286;0.193]	0.672
	B cell malignancies*	12	66.6667	-	-	-	-	-	-	-	-	-	-	-	-
	Myeloid malignancies*	3	16.6667	-	-	-	-	-	-	-	-	-	-	-	-
	Multiple myeloma*	2	11.1111	-	-	-	-	-	-	-	-	-	-	-	-
	Others*	1	5.55556	-	-	-	-	-	-	-	-	-	-	-	-
	Solid malignancies	73	x	-0.215 [-0.376;-0.073]	0.002	-0.113 [-0.274;0.061]	0.154	-0.062 [-0.201;0.065]	0.361	-0.101 [-0.25;0.059]	0.204	0.014 [-0.153;0.215]	0.878	0.041 [-0.191;0.253]	0.700
	Breast cancer*	22	24.1758	-	-	-	-	-	-	-	-	-	-	-	-
	Gastrointestinal cancer*	19	20.8791	-	-	-	-	-	-	-	-	-	-	-	-
	Lung cancer*	9	9.89011	-	-	-	-	-	-	-	-	-	-	-	-
	Head&Neck cancer*	8	8.79121	-	-	-	-	-	-	-	-	-	-	-	-
	Melanoma*	7	7.69231	-	-	-	-	-	-	-	-	-	-	-	-
	Gynecologic cancer*	5	5.49451	-	-	-	-	-	-	-	-	-	-	-	-
	Genitourinary cancer*	2	2.1978	-	-	-	-	-	-	-	-	-	-	-	-
	Sarcoma*	1	1.0989	-	-	-	-	-	-	-	-	-	-	-	-
Tumor stage	Localized*	10	10.989	reference
	Locally advanced tumors*	18	19.7802	-0.077 [-0.453;0.299]	0.674			-0.215 [-0.488;0.070]	0.149			-0.264 [-0.968;0.452]	0.465
	Metastasic tumors*	63	69.2308	0.0514 [-0.308;0.35]	0.753			-0.295 [-0.576;-0.047]	0.037			-0.11 [-0.779;0.485]	0.742
* Percentages in cancer group (N=91).

## Sheet: TableS1_Subtable S1a
Table S1. Characteristics of patients enrolled in ONCOVID trial or from the pre-COVID era comprising cancer patients and cancer-free controls.
Subtable S1a. Clinical features relevant to cancer and cancer free individuals analyzed in the crosspresentation and the peptide based assays, according to COVID-19 history.
		Controls (n=320)		Acute COVID-19 (n=22)		Convalescent (n=30)
Age (years)	Median	61		59		63
	[Range]	[18-89]		[19-89]		[31-83]
Sampling time (Covid-19 era)	Median	2020-04-27		2020-04-30		2020-05-29
	[Range]	[10/04/20;21/07/20]		[10/04/20;18/12/20]		[20/04/20;29/06/20]
		n	%	n	%	n	%
Years	2000 - Nov. 2002	7	2.20126	-	-	-	-
	Nov. 2002 - 2018	61	19.1824	-	-	-	-
	2020 - 2021	250	78.6164	22	100	26	100
	Unknown	2	-	-	-	-	-
Gender	Male	124	45.2555	8	34.7826	11	36.6667
	Female	150	54.7445	14	60.8696	18	60
	Unknown	46	-	-	-	1	3
Malignancy	Yes	257	80	22	100	30	100
	No	63	20	0	0	0	0
Cancer type	Solid malignancies	220	85.6031	17	77.2727	24	80
	Haematologic malignancies	20	7.7821	6	27.2727	5	16.6667
	B cells malignancies	14	5.44747	2	9.09091	2	6.66667
	Myeloid malignancies	4	1.55642	2	9.09091	2	6.66667
	Multiple myeloma	2	0.77821	2	9.09091	1	3.33333
	Unknown	17	6.61479	0	0	0	0
Tumor stage	Localized	78	31.7073	8	36.3636	13	43.3333
	Locally advanced	36	14.6341	3	13.6364	5	16.6667
	Metastatic	132	53.6585	11	50	12	40
	Unknown	11	-	-	-	-	-
Therapies	Not treated	67	26	2	9	2	7
	Chemotherapy	67	26	14	64	16	53
	Hormonotherapy	25	10	3	14	5	17
	Immunotherapy	43	17	1	5	1	3
	Radiotherapy/Radiofrequency	40	16	6	27	8	27
	Targeted therapy	33	13	1	5	2	7
COVID-19 severity	Mild	-	-	11	50	12	40
	Moderate	-	-	8	36.3636	10	33.3333
	Severe	-	-	3	13.6364	6	20
	Unknown	-	-	-	-	2	6.66667
Test	CrossP IVS	199	62	22	100	3	10
	Peptide IVS	65	20	0	0	2	17
	Both	56	18	0	0	25	83
* : statistical analyses between controls and acute COVID-19;
# : statistical analyses between controls and convalescent
IVS: in vitro stimulation

## Sheet: Subtable S1b
	Subtable S1b. Number of individuals tested in crosspresentation assays for each clinical category.
			Patients evaluated for SARS-CoV-2 in cross-presentation assay : n=355*								Total
			Covid-19 era (April 2020 to September 2020) n=289				Pre-Covid-19 era (1999-2018) : n=66				n=355
			Cancer : n= 229		Cancer-free : n= 60		Cancer : n= 29		Cancer-free : n= 37		n=355
			SARS-CoV-2		SARS-CoV-2		SARS-CoV-2		SARS-CoV-2
	Covid-19 history	Controls	n=191**		n=22		29		37		n=279
		Acute Covid-19 infection	n=19**		n=0		-		-		n=19
		Convalescent	n=28**		n=28		-		-		n=56
	Covid-19 susceptibility (spontaneous immunity)	Not Assessed	n=15		-		-		-		n=15
		Unknown	n=153		-		-		-		n=153
		Resistant	n=42		-		-		-		n=42
		Susceptible	n=19		-		-		-		n=19
	Covid-19 susceptibility (post infection immunity)	Multi-contact	-		2		-		-		n=2
		Reinfected	-		8		-		-		n=10
		*27 additional patients have been evaluated only for anti-CCC reactivities
		**9 Patients were sampled both before and after COVID-19

## Sheet: Subtable S1c S1d 
	Subtable S1c. Uni-and multivariable analyses of the impact of oncological parameters on SARS-CoV-2 specific memory IL-2+ T cell responses in cancer patients without history of COVID-19 (n=191).
	Characteristic	n	%	Univariable estimate [95% CI]	P.value	Multivariable estimate [95% CI]	P.value
	Gender
	Female	109	57.0681	Reference		Reference
	Male	82	42.9319	0.043 [-0.204;0.29]	0.733	-0.125 [-0.449;0.198]	0.451
	Age (years)
	<65	122	63.8743	Reference		Reference
	≥65	69	36.1257	0.075 [-0.171;0.322]	0.551	0.235 [-0.081;0.55]	0.153
	Comorbidities
	0-1	155	82	Reference		Reference
	≥2	18	9.42408	-0.073 [-0.381;0.236]	0.647	-0.123 [-0.496;0.249]	0.52
	Unknown	18	9.42408	_	_	_	_
	Cancer type
	Hemato	18	9.42408	Reference
	Solid	173	90.5759	0.118 [-0.334;0.57]	0.609	_	_
	Tumor stage
	Locally advanced-Advanced	66	34.555	Reference		Reference
	Localized	125	65.445	-0.095 [-0.372;0.182]	0.502	0.231 [-0.093;0.555]	0.169
	Anticancer therapy
	No	63	32.9843	Reference		Reference
	Yes	128	67.0157	-0.052 [-0.361;0.257]	0.742	-0.259 [-0.794;0.276]	0.347
	Immunotherapy
	No	158	82.7225	Reference
	Yes	33	17.2775	-0.019 [-0.375;0.338]	0.919	_	_
	Chemotherapy
	No	133	69.6335	Reference
	Yes	58	30.3665	0.032 [-0.27;0.333]	0.838	_	_
	Targeted therapy
	No	162	84.8168	Reference
	Yes	29	15.1832	0.155 [-0.213;0.523]	0.409	_	_
	Hormonotherapy
	No	170	89.0052	Reference
	Yes	21	10.9948	-0.072 [-0.507;0.362]	0.745	_	_
	Radiotherapy/radiofrequency
	No	158	82.7225	Reference
	Yes	33	17.2775	-0.182 [-0.531;0.167]	0.308	_	_
	Subtable S1d. Uni-and multivariable analyses of the impact of oncological parameters on SARS-CoV-2 specific memory IL-2+ T cell responses in cancer patients with history of COVID-19 (n=28).
	Characteristic	n	%	Univariable estimate [95% CI]	P.value	Multivariable estimate [95% CI]	P.value
	Gender
	Female	17	60.7143	Reference		Reference
	Male	11	39.2857	0.295 [-0.177;0.767]	0.23	0.041 [-0.372;0.455]	0.846
	Age (years)
	<65	11	39.2857	Reference		Reference
	≥65	17	60.7143	0.39 [-0.074;0.854]	0.109	0.287 [-0.108;0.681]	0.166
	Covid-19
	Moderate-Severe	10	35.7143	Reference		Reference
	Mild	18	64.2857	0.581 [0.189;0.972]	0.007	0.564 [0.159;0.968]	0.011
	Comorbidities
	0-1	10	35.7143	_	_	_	_
	≥2	5	17.8571	_	_	_	_
	Unknown	13	46.4286	_	_	_	_
	Cancer type
	Hemato	5	17.8571	_	_	_	_
	Solid	23	82.1429	_	_	_	_
	Tumor stage
	Locally advanced-Advanced	13	46.4286	Reference		Reference
	Localized	15	53.5714	0.189 [-0.227;0.604]	0.379	-0.209 [-0.604;0.187]	0.310
	Anticancer therapy
	No	2	7.14286	_	_	_	_
	Yes	26	92.8571	_	_	_	_
	Immunotherapy
	No	27	96.4286	_	_	_	_
	Yes	1	3.57143	_	_	_	_
	Chemotherapy
	No	14	50	Reference
	Yes	14	50	0.217 [-0.269;0.704]	0.388	_	_
	Targeted therapy
	No	25	89.2857	_	_	_	_
	Yes	3	10.7143	_	_	_	_
	Hormonotherapy
	No	22	78.5714	_	_	_	_
	Yes	6	21.4286	_	_	_	_
	Radiotherapy/radiofrequency
	No	20	71.4286	Reference
	Yes	8	28.5714	0.3 [-0.234;0.834]	0.28	_	_

## Sheet: Subtable S1e S1f
	Subtable S1e. Uni-and multivariable analyses of the impact of oncological parameters on SARS-CoV-2 specific memory IL-5+ T cell responses in cancer patients without history of COVID-19 (n=191).
	Characteristic	n	%	Univariable estimate [95% CI]	P.value	Multivariable estimate [95% CI]	P.value
	Gender
	Female	109	57.0681	Reference		Reference
	Male	82	42.9319	-0.093 [-0.249;0.063]	0.248	-0.195 [-0.447;0.057]	0.137
	Age (years)
	<65	122	63.8743	Reference		Reference
	≥65	69	36.1257	0.025 [-0.132;0.183]	0.752	0.029 [-0.218;0.275]	0.822
	Comorbidities
	0-1	155	82	Reference		Reference
	≥2	18	9.42408	0.104 [-0.126;0.334]	0.381	0.116 [-0.175;0.407]	0.437
	Unknown	18	9.42408	_	_	_	_
	Cancer type
	Hemato	18	9.42408	Reference
	Solid	173	90.5759	0.296 [-0.011;0.604]	0.06	_	_
	Tumor stage
	Locally advanced-Advanced	66	34.555	Reference		Reference
	Localized	125	65.445	0.046 [-0.144;0.237]	0.636	0.171 [-0.082;0.424]	0.191
	Anticancer therapy
	No	63	32.9843	Reference		Reference
	Yes	128	67.0157	-0.089 [-0.299;0.121]	0.407	-0.058 [-0.476;0.36]	0.786
	Immunotherapy
	No	158	82.7225	Reference
	Yes	33	17.2775	0.028 [-0.204;0.259]	0.814	_	_
	Chemotherapy
	No	133	69.6335	Reference
	Yes	58	30.3665	-0.101 [-0.31;0.109]	0.349	_	_
	Targeted therapy
	No	162	84.8168	Reference
	Yes	29	15.1832	0.085 [-0.169;0.34]	0.512	_	_
	Hormonotherapy
	No	170	89.0052	Reference
	Yes	21	10.9948	-0.001 [-0.295;0.293]	0.995	_	_
	Radiotherapy/radiofrequency
	No	158	82.7225	Reference
	Yes	33	17.2775	-0.096 [-0.334;0.142]	0.432	_	_
	Subtable S1f. Uni-and multivariable analyses of the impact of oncological parameters on SARS-CoV-2 specific memory IL-5+ T cell responses in cancer patients with history of COVID-19 (n=28).
	Characteristic	n	%	Univariable estimate [95% CI]	P.value	Multivariable estimate [95% CI]	P.value
	Gender
	Female	17	60.7143	Reference		Reference
	Male	11	39.2857	0.015 [-0.446;0.476]	0.949	0.082 [-0.411;0.574]	0.747
	Age (years)
	<65	11	39.2857	Reference		Reference
	≥65	17	60.7143	-0.078 [-0.538;0.383]	0.743	-0.035 [-0.506;0.435]	0.884
	Covid-19
	Moderate-Severe	10	35.7143	Reference		Reference
	Mild	18	64.2857	-0.13 [-0.583;0.323]	0.577	-0.139 [-0.621;0.343]	0.576
	Comorbidities
	0-1	10	35.7143	_	_	_	_
	≥2	5	17.8571	_	_	_	_
	Unknown	13	46.4286	_	_	_	_
	Cancer type
	Hemato	5	17.8571	_	_	_	_
	Solid	23	82.1429	_	_	_	_
	Tumor stage
	Locally advanced-Advanced	13	46.4286	Reference		Reference
	Localized	15	53.5714	-0.243 [-0.643;0.156]	0.241	0.239 [-0.232;0.71]	0.329
	Anticancer therapy
	No	2	7.14286	_	_	_	_
	Yes	26	92.8571	_	_	_	_
	Immunotherapy
	No	27	96.4286	_	_	_	_
	Yes	1	3.57143	_	_	_	_
	Chemotherapy
	No	14	50	Reference
	Yes	14	50	-0.115 [-0.583;0.353]	0.633	_	_
	Targeted therapy
	No	25	89.2857	_	_	_	_
	Yes	3	10.7143
	Hormonotherapy
	No	22	78.5714	_	_	_	_
	Yes	6	21.4286	_	_	_	_
	Radiotherapy/radiofrequency
	No	20	71.4286	Reference
	Yes	8	28.5714	-0.012 [-0.473;0.45]	0.961	_	_

## Sheet: Table S2_Subtable 2a
	Table S2. Characteristics of contact (resistant) and infected (susceptible) cancer patients and corresponding swimmer plots.
	Subtable S2a. ONCOVID study
			Resistant (n=48)		Susceptible (n=22)		P.value
	Age (years)	Median	54		53		0.9
		[Range]	[19-81]		[22-80]
			n	%	n	%
	Gender	Male	16	33	11	50	0.2
		Female	32	67	11	50
	Malignancy	Yes	48	100	22	100	1.0
		No	0	0	0	0
	Type of cancer	Solid tumors	45	94	19	86	0.37
		Hematologic tumors	3	6	3	14
	Tumor stage	Localized	22	45	4	18	0.07
		Locally advanced	7	15	5	23
		Metastatic	19	40	13	59
	COVID-19 severity	Mild	-	-	17	77.2727
		Moderate	-	-	2	9.09091	-
		Severe	-	-	3	13.6364
	Test	CrossP	3	6	4	18	-
		Peptide based assay	6	13	3	14
		Both	39	81	15	68
	Individual swimmer plots for each susceptible cancer patient (i.e. who got infected during the second or the third surge of the pandemic) depicting patients still alive (blue), patients dead from cancer (orange), or from COVID-19 (red) after infection indicated with an arrow.

## Sheet: Subtable 2b
	Subtable S2b. Second cohort of 18 subjects including HCW from Hospices Civils de Lyon (COVID-SER study) and HCW and cancer patients from GR drawn in April 2020 with 15 months follow up.
			Resistant (n=9)		Susceptible (n=9)		P.value
	Age (years)	Median	50		44		0.452
		[Range]	[28-71]		[28-82]
			n	%	n	%
	Gender	Male	4	44	2	22	1.000
		Female	5	56	7	78
	Malignancy	Yes	5	56	3	33	1.000
		No	4	44	6	67
	Type of cancer	Solid tumors	5	100	3	100	1.000
		Hematologic tumors	0	0	0	0
	Tumor stage	Localized	1	20	1	33.3333	1.000
		Locally advanced	0	0	1	33.3333
		Metastatic	4	80	1	33.3333
	COVID-19 severity	Mild	-	-	5	83.3333	-
		Moderate	-	-	1	16.6667
		Severe	-	-	0	0
		Unknown	-	-	3	-
	Individual swimmer plots for each susceptible HCW or cancer patients from the second cohort (i.e. who got infected during the second or the third surge of the pandemic) depicting patients still alive (blue), dead from cancer (orange), or from COVID-19 (red) after infection indicated with an arrow.

## Sheet: Table S3
Table S3. Characteristics of family members during the 2020 lock down (Protect-CoV study).
		Total		Contact (n=22)		Convalescent (n=29)		P.value
Age (years)	Median	46		39		49		0.69
	[Range]	[17-75]		[17-75]		[20-62]
Sampling Time	Median			24/06/20		22/06/20		-
	[Range]			[17/06/20;01/07/20]		[16/06/20;25/06/20]
		n	%	n	%	n	%
Gender	Male	26	51	13	59.0909	13	45	0.40
	Female	25	49	9	40.9091	16	55
Number of contacts per case within the family
1-3				5	22.7273	1	3	< 0.01
4-6				14	63.6364	15	52
7-9				1	4.54545	8	28
10-12				2	9.09091	0	0
> 12				0	0	5	17
Number of SARS-CoV-2 positive individuals in the family
0				4	18.1818	0	0	< 0.01
1-3				18	81.8182	18	62.069
4-6				0	0	5	17.2414
7-15				0	0	6	20.6897
Household size
0				2	9.09091	0	0	< 0.01
1-2				0	0	5	17.2414
3-5				18	81.8182	16	55.1724
6-8				2	9.09091	8	27.5862
Household living space (m2)
< 70				7	31.8182	6	21	0.16
70-100				3	13.6364	11	38
> 100				12	54.5455	12	41
Number of rooms in the household
2-3				10	45.4545	7	24	0.22
4-5				6	27.2727	14	48
6-8				6	27.2727	8	28
Number of individuals using personal protective equipment				13	59.0909	18	62	1
Number of individuals respecting barrier gestures				16	72.7273	22	76	1

## Sheet: Table S4 DESEQ2 results
Table S4. Gene set enrichment analysis of PBL in the SARS-CoV-2-stimulated crosspresentation assay.
	geneID	symbolGene	baseMean	log2FoldChange	lfcSE	stat	pvalue	padj
1	ENSG00000000003	TSPAN6	24.3923	-0.785525	0.517739	-1.51722	0.12921	0.557543
2	ENSG00000000005	TNMD	0.0137884	-0.0879554	2.98157	-0.0294997	0.976466	NA
3	ENSG00000000419	DPM1	1935.36	-0.0551634	0.103323	-0.533894	0.593415	0.869529
4	ENSG00000000457	SCYL3	804.22	-0.187755	0.223882	-0.838636	0.401674	0.78223
5	ENSG00000000460	C1orf112	434.855	-0.565823	0.178132	-3.17642	0.00149104	0.124499
6	ENSG00000000938	FGR	35063	0.653696	0.38376	1.7034	0.0884935	0.490635
7	ENSG00000000971	CFH	284.565	-1.03696	0.357715	-2.89884	0.00374551	0.172951
8	ENSG00000001036	FUCA2	3490.59	0.350476	0.316181	1.10846	0.267661	0.695808
9	ENSG00000001084	GCLC	9830.87	0.583076	0.33581	1.73633	0.0825061	0.47823
10	ENSG00000001167	NFYA	1890.28	0.0191745	0.141123	0.135871	0.891923	0.971529
11	ENSG00000001460	STPG1	243.277	-0.29946	0.163769	-1.82856	0.0674662	0.450376
12	ENSG00000001461	NIPAL3	1964.32	-0.448753	0.177456	-2.52881	0.0114449	0.252122
13	ENSG00000001497	LAS1L	1503.47	0.199758	0.163547	1.22141	0.22193	0.658913
14	ENSG00000001561	ENPP4	1160.15	-0.194218	0.229125	-0.84765	0.396633	0.780262
15	ENSG00000001617	SEMA3F	11.0581	-0.68096	0.750722	-0.907074	0.364368	0.761388
16	ENSG00000001626	CFTR	0.665182	2.87446	2.93731	0.978602	0.327777	NA
17	ENSG00000001629	ANKIB1	2301.72	-0.122066	0.181528	-0.672434	0.501307	0.828511
18	ENSG00000001630	CYP51A1	4389.01	0.335468	0.355846	0.942734	0.345817	0.74946
19	ENSG00000001631	KRIT1	1360.98	-0.10041	0.14848	-0.676254	0.49888	0.82776
20	ENSG00000002016	RAD52	494.559	-0.116475	0.196164	-0.593763	0.552671	0.851402
21	ENSG00000002079	MYH16	3.01525	0.387926	1.03339	0.375393	0.707368	0.912811
22	ENSG00000002330	BAD	399.547	-0.403672	0.139618	-2.89126	0.00383697	0.173731
23	ENSG00000002549	LAP3	9234.17	0.0929368	0.249121	0.373059	0.709104	0.913527
24	ENSG00000002586	CD99	9174.79	-0.439491	0.160843	-2.73242	0.00628711	0.218307
25	ENSG00000002587	HS3ST1	379.892	0.129737	0.622788	0.208317	0.834982	0.954179
26	ENSG00000002726	AOC1	156.426	1.00968	0.507733	1.9886	0.0467452	0.396623
27	ENSG00000002745	WNT16	2.80742	-0.680775	0.805966	-0.84467	0.398295	0.780912
28	ENSG00000002746	HECW1	23.3438	-0.389315	0.403114	-0.965767	0.334161	0.742494
29	ENSG00000002822	MAD1L1	1551.66	-0.0690449	0.216727	-0.31858	0.750045	0.929138
30	ENSG00000002834	LASP1	40940.5	0.32594	0.22981	1.4183	0.156103	0.591911
31	ENSG00000002919	SNX11	927.344	-0.0611754	0.172022	-0.355624	0.722122	0.918703
32	ENSG00000002933	TMEM176A	969.667	0.380683	0.608924	0.625173	0.531858	0.843614
33	ENSG00000003056	M6PR	21331	0.319367	0.337091	0.94742	0.343425	0.748162
34	ENSG00000003096	KLHL13	15.2656	-1.27835	0.476253	-2.68418	0.00727071	0.225387
35	ENSG00000003137	CYP26B1	2.38297	-0.36109	0.619546	-0.58283	0.560008	0.85495
36	ENSG00000003147	ICA1	299.787	-0.476476	0.445257	-1.07011	0.284568	0.708611
37	ENSG00000003249	DBNDD1	26.7044	0.105723	0.388162	0.272369	0.785338	0.938672
38	ENSG00000003393	ALS2	1089.3	-0.163382	0.219557	-0.744143	0.45679	0.80766
39	ENSG00000003400	CASP10	1529.1	-0.345013	0.170969	-2.01799	0.0435927	0.38883
40	ENSG00000003402	CFLAR	15176.3	-0.120773	0.149124	-0.809884	0.418007	0.790131
41	ENSG00000003436	TFPI	1168.05	0.602838	0.434281	1.38813	0.165098	0.601211
42	ENSG00000003509	NDUFAF7	805.975	-0.373775	0.169696	-2.20262	0.0276214	0.339383
43	ENSG00000003756	RBM5	6884.83	0.071983	0.173839	0.414077	0.678817	0.901812
44	ENSG00000003987	MTMR7	0.848031	-0.100188	1.39553	-0.0717925	0.942767	NA
45	ENSG00000003989	SLC7A2	2.33425	-0.59083	0.532884	-1.10874	0.267542	0.695808
46	ENSG00000004059	ARF5	3515.94	-0.231681	0.0939072	-2.46712	0.0136203	0.266493
47	ENSG00000004139	SARM1	751.967	-0.00982384	0.182681	-0.0537758	0.957114	0.98881
48	ENSG00000004142	POLDIP2	2644.05	0.148507	0.184808	0.803574	0.421643	0.792318
49	ENSG00000004399	PLXND1	16298.8	0.257013	0.393688	0.652834	0.513863	0.833545
50	ENSG00000004455	AK2	3758.76	-0.190979	0.129058	-1.4798	0.138928	0.570942
51	ENSG00000004468	CD38	3029.74	-1.32563	0.521609	-2.54143	0.0110401	0.247692
52	ENSG00000004478	FKBP4	11552.6	-0.0246395	0.515769	-0.0477724	0.961898	0.990421
53	ENSG00000004487	KDM1A	2180.6	-0.104472	0.103664	-1.00779	0.313554	0.730149
54	ENSG00000004534	RBM6	7379.83	-0.289165	0.282892	-1.02217	0.306699	0.724935
55	ENSG00000004660	CAMKK1	729.477	0.533813	0.272925	1.9559	0.0504771	0.40772
56	ENSG00000004700	RECQL	4382.72	0.0413125	0.139066	0.297072	0.766412	0.933694
57	ENSG00000004766	VPS50	1433.17	0.104311	0.291912	0.357337	0.72084	0.918375
58	ENSG00000004776	HSPB6	1.6737	-0.747408	0.735728	-1.01588	0.309689	NA
59	ENSG00000004777	ARHGAP33	422.706	-1.15548	0.434968	-2.65648	0.00789607	0.230022
60	ENSG00000004779	NDUFAB1	1017.33	0.133912	0.19512	0.686307	0.492519	0.826047
61	ENSG00000004799	PDK4	3124.97	0.0338479	0.429062	0.078888	0.937122	0.984004
62	ENSG00000004809	SLC22A16	46.0459	0.0182183	0.550063	0.0331204	0.973579	0.99394
63	ENSG00000004838	ZMYND10	87.1366	-0.160971	0.521312	-0.308781	0.757488	0.93116
64	ENSG00000004846	ABCB5	34.8508	-0.894457	0.416051	-2.14988	0.0315651	0.352999
65	ENSG00000004848	ARX	0.629332	-1.04002	1.40902	-0.738114	0.460445	NA
66	ENSG00000004864	SLC25A13	1135.3	0.293011	0.349207	0.839076	0.401426	0.781992
67	ENSG00000004866	ST7	811.502	-0.143528	0.264042	-0.54358	0.58673	0.867701
68	ENSG00000004897	CDC27	3847.47	-0.0623804	0.15399	-0.405094	0.685409	0.903457
69	ENSG00000004939	SLC4A1	32.8136	-0.833091	0.477521	-1.74462	0.0810513	0.475415
70	ENSG00000004948	CALCR	1.39235	-0.257921	0.847078	-0.304483	0.76076	NA
71	ENSG00000004961	HCCS	1110.03	0.110598	0.164449	0.672538	0.501241	0.828511
72	ENSG00000004975	DVL2	1213.86	-0.116474	0.189428	-0.614872	0.538639	0.846042
73	ENSG00000005001	PRSS22	31.5725	0.42852	0.554242	0.773164	0.439425	0.800021
74	ENSG00000005007	UPF1	5443.87	0.00586724	0.0816893	0.0718239	0.942742	0.985286
75	ENSG00000005020	SKAP2	5549.54	0.202954	0.35237	0.575968	0.564637	0.856683
76	ENSG00000005022	SLC25A5	10566.9	-0.00280384	0.188745	-0.0148552	0.988148	0.997321
77	ENSG00000005059	MCUB	1134.19	-0.301667	0.177184	-1.70256	0.0886501	0.491042
78	ENSG00000005073	HOXA11	3.39547	-1.10128	0.73835	-1.49154	0.13582	0.567942
79	ENSG00000005075	POLR2J	1226.99	-0.240198	0.183895	-1.30617	0.191494	0.629233
80	ENSG00000005100	DHX33	1118.81	0.174383	0.143812	1.21258	0.225291	0.661873
81	ENSG00000005102	MEOX1	10.1972	1.68784	0.613581	2.75081	0.0059449	0.21508
82	ENSG00000005108	THSD7A	4.68374	0.781593	0.658445	1.18703	0.235216	0.669247
83	ENSG00000005156	LIG3	2027.89	0.238141	0.208512	1.1421	0.253413	0.685758
84	ENSG00000005175	RPAP3	1425.22	0.0818406	0.165547	0.494364	0.621049	0.882254
85	ENSG00000005187	ACSM3	163.513	0.29801	0.36702	0.811974	0.416807	0.789835
86	ENSG00000005189	REXO5	267.049	-0.570836	0.366531	-1.5574	0.119375	0.545132
87	ENSG00000005194	CIAPIN1	1107.13	0.0698502	0.171824	0.406521	0.68436	0.903277
88	ENSG00000005206	SPPL2B	1372.31	0.346471	0.178707	1.93877	0.0525297	0.413641
89	ENSG00000005238	FAM214B	3440.03	0.284811	0.286122	0.995418	0.319533	0.734331
90	ENSG00000005243	COPZ2	75.4721	-0.00186493	0.213103	-0.00875134	0.993018	0.998801
91	ENSG00000005249	PRKAR2B	686.951	-0.0676268	0.310337	-0.217914	0.827496	0.952729
92	ENSG00000005302	MSL3	2975.32	-0.0381838	0.183735	-0.207819	0.83537	0.954335
93	ENSG00000005339	CREBBP	6998.81	-0.0580586	0.164571	-0.352787	0.724248	0.919292
94	ENSG00000005379	TSPOAP1	1165.38	-0.00915428	0.338262	-0.0270627	0.97841	0.995672
95	ENSG00000005381	MPO	638.833	0.64044	0.410237	1.56115	0.118489	0.543911
96	ENSG00000005436	GCFC2	517.212	-0.263355	0.209557	-1.25673	0.208853	0.645926
97	ENSG00000005448	WDR54	533.991	-0.881468	0.453127	-1.9453	0.0517391	0.411174
98	ENSG00000005469	CROT	338.273	-0.31366	0.272244	-1.15213	0.249268	0.682147
99	ENSG00000005471	ABCB4	215.274	1.07584	0.394871	2.72453	0.00643927	0.218897
100	ENSG00000005483	KMT2E	10261	-0.253112	0.16093	-1.57281	0.115764	0.538162
101	ENSG00000005486	RHBDD2	1653.46	0.242083	0.145277	1.66635	0.0956434	0.504596
102	ENSG00000005513	SOX8	55.405	0.886334	0.328564	2.6976	0.00698418	0.223292
103	ENSG00000005700	IBTK	4733.81	0.283028	0.217263	1.30269	0.192679	0.631125
104	ENSG00000005801	ZNF195	875.35	0.122002	0.150012	0.813284	0.416055	0.789487
105	ENSG00000005810	MYCBP2	8052.28	-0.0877832	0.150862	-0.581876	0.56065	0.855261
106	ENSG00000005812	FBXL3	2500.75	0.179438	0.134532	1.33379	0.182272	0.619466
107	ENSG00000005844	ITGAL	24046.1	-0.578583	0.322899	-1.79184	0.0731584	0.4608
108	ENSG00000005882	PDK2	707.232	-0.217144	0.250696	-0.866167	0.386399	0.775219
109	ENSG00000005884	ITGA3	2230.28	-0.957729	0.428933	-2.23282	0.0255609	0.331221
110	ENSG00000005889	ZFX	2308.29	0.189363	0.185069	1.0232	0.306213	0.724362
111	ENSG00000005893	LAMP2	11217.3	0.0843478	0.313202	0.269308	0.787693	0.939787
112	ENSG00000005961	ITGA2B	411.833	-0.0809081	0.316001	-0.256038	0.797922	0.943461
113	ENSG00000005981	ASB4	3.97561	-0.13313	0.545813	-0.243911	0.8073	0.946248
114	ENSG00000006007	GDE1	2998.6	-0.020368	0.132969	-0.153179	0.878257	0.968146
115	ENSG00000006015	REX1BD	1004.56	-0.0491567	0.178671	-0.275124	0.783221	0.9385
116	ENSG00000006016	CRLF1	3.36456	1.67443	0.833791	2.00821	0.044621	0.391291
117	ENSG00000006025	OSBPL7	1519.02	-0.511023	0.395954	-1.29061	0.196838	0.634672
118	ENSG00000006042	TMEM98	35.9452	-0.509379	0.40827	-1.24765	0.212159	0.649786
119	ENSG00000006047	YBX2	28.3521	-1.79293	0.688054	-2.60579	0.00916616	0.233751
120	ENSG00000006062	MAP3K14	1862.67	-0.200214	0.136723	-1.46437	0.143092	0.576069
121	ENSG00000006071	ABCC8	0.60119	1.21215	1.39909	0.86638	0.386282	NA
122	ENSG00000006116	CACNG3	1.0346	-2.14054	1.97857	-1.08186	0.279315	NA
123	ENSG00000006118	TMEM132A	329.404	0.367184	0.506303	0.725226	0.468313	0.813929
124	ENSG00000006125	AP2B1	7550.17	-0.312317	0.15901	-1.96414	0.0495143	0.405413
125	ENSG00000006194	ZNF263	1344.54	0.0520956	0.085753	0.607508	0.543514	0.848033
126	ENSG00000006210	CX3CL1	24.5982	0.733778	0.471569	1.55604	0.1197	0.545136
127	ENSG00000006282	SPATA20	2093.74	0.273273	0.21363	1.27919	0.200829	0.637415
128	ENSG00000006283	CACNA1G	381.616	0.57108	0.494734	1.15432	0.24837	0.681015
129	ENSG00000006327	TNFRSF12A	624.89	0.503417	0.334331	1.50574	0.132133	0.563038
130	ENSG00000006432	MAP3K9	391.423	-0.213268	0.303435	-0.702847	0.482151	0.820107
131	ENSG00000006451	RALA	4254.38	0.246769	0.250606	0.984689	0.324777	0.736425
132	ENSG00000006453	BAIAP2L1	71.3301	0.182669	0.648074	0.281865	0.778047	0.937329
133	ENSG00000006459	KDM7A	3971.75	0.205265	0.199219	1.03035	0.302847	0.721175
134	ENSG00000006468	ETV1	20.2255	0.183249	0.691594	0.264966	0.791035	0.940849
135	ENSG00000006530	AGK	1406.46	-0.331766	0.183205	-1.81091	0.0701554	0.455519
136	ENSG00000006534	ALDH3B1	3806.16	0.565805	0.441783	1.28073	0.200288	0.636959
137	ENSG00000006555	TTC22	272.926	-0.547584	0.376948	-1.45268	0.146313	0.581202
138	ENSG00000006576	PHTF2	2500.15	0.0826196	0.145026	0.56969	0.568888	0.85901
139	ENSG00000006606	CCL26	1.1927	1.42381	1.72251	0.826593	0.408468	NA
140	ENSG00000006607	FARP2	1146.25	0.518074	0.2091	2.47764	0.0132256	0.264575
141	ENSG00000006611	USH1C	3.09169	-2.99841	1.45725	-2.05758	0.0396309	0.381103
142	ENSG00000006625	GGCT	1718.61	-0.0348337	0.18854	-0.184755	0.853421	0.960687
143	ENSG00000006634	DBF4	1258.55	-0.159855	0.180285	-0.886683	0.37525	0.768809
144	ENSG00000006638	TBXA2R	199.757	0.499924	0.192641	2.59511	0.00945611	0.235892
145	ENSG00000006652	IFRD1	2380.85	-0.00967277	0.288603	-0.0335159	0.973263	0.993829
146	ENSG00000006659	LGALS14	0.560274	1.15583	1.40462	0.822878	0.410577	NA
147	ENSG00000006695	COX10	1032.5	0.278357	0.219406	1.26868	0.204554	0.642003
148	ENSG00000006704	GTF2IRD1	604.956	0.34713	0.313944	1.10571	0.268852	0.696645
149	ENSG00000006712	PAF1	3406.13	-0.219561	0.314078	-0.699063	0.484513	0.821483
150	ENSG00000006715	VPS41	4286.28	0.202611	0.330208	0.613587	0.539488	0.846673
151	ENSG00000006740	ARHGAP44	5.71021	1.45094	0.543108	2.67155	0.00755016	0.228657
152	ENSG00000006744	ELAC2	2566.73	-0.0910916	0.231681	-0.393178	0.694188	0.908111
153	ENSG00000006747	SCIN	519.073	1.13565	0.585362	1.94008	0.0523703	0.413092
154	ENSG00000006756	ARSD	1300.72	0.0310561	0.289901	0.107127	0.914689	0.979712
155	ENSG00000006757	PNPLA4	293.25	0.298275	0.224975	1.32581	0.184901	0.621027
156	ENSG00000006831	ADIPOR2	3680.5	0.188901	0.177336	1.06522	0.286777	0.709859
157	ENSG00000006837	CDKL3	86.5744	0.493645	0.325555	1.51632	0.129439	0.558129
158	ENSG00000007038	PRSS21	123.296	-0.329201	0.378047	-0.870793	0.383867	0.773474
159	ENSG00000007047	MARK4	995.432	-0.199845	0.177272	-1.12734	0.2596	0.690413
160	ENSG00000007062	PROM1	22.3859	0.250406	0.583843	0.428892	0.668002	0.899045
161	ENSG00000007080	CCDC124	1661.46	-0.0493919	0.16844	-0.293231	0.769346	0.934671
162	ENSG00000007129	CEACAM21	373.253	-0.427769	0.328963	-1.30036	0.193479	0.631782
163	ENSG00000007168	PAFAH1B1	6248.7	-0.174736	0.120419	-1.45107	0.146761	0.581499
164	ENSG00000007171	NOS2	4.12796	1.76246	0.693509	2.54136	0.0110422	0.247692
165	ENSG00000007174	DNAH9	4.95711	0.414808	0.664638	0.624112	0.532554	0.843808
166	ENSG00000007202	KIAA0100	15351.2	0.304192	0.255063	1.19262	0.23302	0.667927
167	ENSG00000007237	GAS7	5759.45	0.111799	0.389164	0.287279	0.773899	0.936329
168	ENSG00000007255	TRAPPC6A	378.215	-0.275458	0.128999	-2.13534	0.032733	0.35672
169	ENSG00000007264	MATK	6185.16	0.351552	0.27568	1.27522	0.202232	0.639508
170	ENSG00000007312	CD79B	715.16	0.787307	0.487416	1.61527	0.106253	0.52308
171	ENSG00000007314	SCN4A	8.91445	-0.123629	0.505626	-0.244507	0.806838	0.946224
172	ENSG00000007341	ST7L	518.107	0.0737563	0.137888	0.534899	0.59272	0.869509
173	ENSG00000007350	TKTL1	153.219	-0.244823	0.48369	-0.506157	0.612747	0.878948
174	ENSG00000007372	PAX6	2.1403	1.07266	0.962436	1.11453	0.265052	NA
175	ENSG00000007376	RPUSD1	670.03	0.0661208	0.200617	0.329588	0.741712	0.926255
176	ENSG00000007384	RHBDF1	466.215	0.883531	0.348107	2.5381	0.0111455	0.249462
177	ENSG00000007392	LUC7L	2721.17	-0.30263	0.330357	-0.916069	0.359631	0.759055
178	ENSG00000007402	CACNA2D2	260.634	-0.111226	0.377101	-0.29495	0.768032	0.934186
179	ENSG00000007516	BAIAP3	279.747	0.347144	0.413624	0.839276	0.401315	0.781896
180	ENSG00000007520	TSR3	1068.69	-0.0896117	0.1511	-0.593062	0.55314	0.851766
181	ENSG00000007541	PIGQ	655.636	0.052187	0.116672	0.447295	0.654662	0.893762
182	ENSG00000007545	CRAMP1	1713.34	0.0440337	0.15689	0.280666	0.778967	0.937329
183	ENSG00000007866	TEAD3	172.93	1.00974	0.349685	2.88759	0.0038821	0.174317
184	ENSG00000007908	SELE	0.193253	0.597214	2.97797	0.200544	0.841055	NA
185	ENSG00000007923	DNAJC11	2818.91	0.278525	0.281521	0.989358	0.322488	0.735273
186	ENSG00000007933	FMO3	4.98372	-0.231091	0.512745	-0.450695	0.65221	0.892418
187	ENSG00000007944	MYLIP	809.785	0.0395043	0.416193	0.0949183	0.92438	0.981198
188	ENSG00000007952	NOX1	0.546226	1.10631	1.4916	0.741694	0.458273	NA
189	ENSG00000007968	E2F2	804.603	-1.04573	0.447266	-2.33806	0.0193842	0.295768
190	ENSG00000008018	PSMB1	4054.62	-0.000857335	0.117796	-0.00727814	0.994193	0.999156
191	ENSG00000008056	SYN1	9.8745	1.26048	0.615013	2.04952	0.0404109	0.38332
192	ENSG00000008083	JARID2	5454.22	0.362537	0.164257	2.20714	0.0273045	0.337657
193	ENSG00000008086	CDKL5	270.16	-0.112942	0.178759	-0.631814	0.527508	0.841196
194	ENSG00000008118	CAMK1G	61.0552	0.812576	0.718829	1.13042	0.258301	0.689411
195	ENSG00000008128	CDK11A	3878.34	-0.103889	0.35272	-0.294536	0.768349	0.934193
196	ENSG00000008130	NADK	3887.55	0.0333749	0.155472	0.214669	0.830026	0.953102
197	ENSG00000008226	DLEC1	92.7721	1.40396	0.446481	3.14449	0.00166375	0.13062
198	ENSG00000008256	CYTH3	771.875	0.0365679	0.164901	0.221756	0.824504	0.951537
199	ENSG00000008277	ADAM22	117.025	-0.729637	0.372988	-1.95619	0.0504422	0.40772
200	ENSG00000008282	SYPL1	1585.97	0.381815	0.269434	1.4171	0.156453	0.591911
201	ENSG00000008283	CYB561	663.512	-0.150511	0.188758	-0.797374	0.425234	0.794239
202	ENSG00000008294	SPAG9	8913.21	0.488027	0.259412	1.88128	0.0599338	0.432683
203	ENSG00000008300	CELSR3	366.874	-0.254721	0.362517	-0.702647	0.482275	0.820107
204	ENSG00000008311	AASS	345.182	-0.489151	0.323544	-1.51185	0.130571	0.560456
205	ENSG00000008323	PLEKHG6	7.16407	-0.182732	0.615124	-0.297065	0.766417	0.933694
206	ENSG00000008324	SS18L2	311.211	-0.246618	0.20579	-1.1984	0.230762	0.666411
207	ENSG00000008382	MPND	1261.48	0.042814	0.280838	0.152451	0.878831	0.968294
208	ENSG00000008394	MGST1	3511.84	0.284385	0.410517	0.69275	0.488467	0.824222
209	ENSG00000008405	CRY1	1096.7	0.295512	0.238606	1.2385	0.215532	0.652672
210	ENSG00000008438	PGLYRP1	3.45698	-0.244245	0.353614	-0.690711	0.489747	0.82488
211	ENSG00000008441	NFIX	159.388	0.222292	0.238081	0.93368	0.350469	0.753028
212	ENSG00000008513	ST3GAL1	10773.9	-0.294778	0.167516	-1.7597	0.0784595	0.471104
213	ENSG00000008516	MMP25	552.659	-1.3142	0.346086	-3.79732	0.000146267	0.0419737
214	ENSG00000008517	IL32	14839.5	-0.952502	0.453989	-2.09808	0.0358985	0.368901
215	ENSG00000008710	PKD1	2946.16	0.0767492	0.159263	0.481902	0.629875	0.885194
216	ENSG00000008735	MAPK8IP2	26.9558	0.21268	0.40653	0.523159	0.600864	0.873242
217	ENSG00000008838	MED24	2643.85	-0.110246	0.14612	-0.754486	0.450557	0.805364
218	ENSG00000008853	RHOBTB2	3287.51	0.489172	0.494168	0.98989	0.322228	0.734949
219	ENSG00000008869	HEATR5B	2144.22	-0.111443	0.252078	-0.442096	0.65842	0.894859
220	ENSG00000008952	SEC62	7001.67	-0.0402449	0.181928	-0.221214	0.824926	0.951759
221	ENSG00000008988	RPS20	21644.4	-0.31912	0.240387	-1.32753	0.184334	0.620742
222	ENSG00000009307	CSDE1	30025.5	0.216822	0.162282	1.33608	0.181524	0.618355
223	ENSG00000009335	UBE3C	4879.29	0.13534	0.281568	0.480665	0.630754	0.885229
224	ENSG00000009413	REV3L	2006.75	0.0877306	0.145348	0.603589	0.546117	0.84909
225	ENSG00000009694	TENM1	83.4363	-0.305101	0.55921	-0.545593	0.585346	0.867013
226	ENSG00000009724	MASP2	6.27763	0.0894265	0.966687	0.0925082	0.926294	0.981545
227	ENSG00000009765	IYD	28.5255	-0.507226	0.381507	-1.32953	0.183672	0.620594
228	ENSG00000009780	FAM76A	561.801	0.107424	0.193197	0.556036	0.578186	0.863571
229	ENSG00000009790	TRAF3IP3	5398.36	-0.293001	0.319943	-0.915792	0.359776	0.759055
230	ENSG00000009830	POMT2	472.892	0.22771	0.270201	0.842741	0.399373	0.781329
231	ENSG00000009844	VTA1	1832.02	0.0911989	0.127597	0.714741	0.474769	0.816891
232	ENSG00000009950	MLXIPL	195.86	0.864734	0.350491	2.46721	0.0136172	0.266493
233	ENSG00000009954	BAZ1B	8840.31	-0.00469824	0.133352	-0.0352319	0.971895	0.993751
234	ENSG00000010017	RANBP9	2875.85	-0.260233	0.138863	-1.87402	0.0609274	0.434873
235	ENSG00000010030	ETV7	134.256	-1.03137	0.633118	-1.62903	0.103307	0.517698
236	ENSG00000010072	SPRTN	442.434	0.0591639	0.147736	0.400469	0.688811	0.905479
237	ENSG00000010165	EEF1AKNMT	1769.13	0.176249	0.120901	1.4578	0.144895	0.578979
238	ENSG00000010219	DYRK4	734.216	-0.454507	0.200606	-2.26567	0.0234718	0.319429
239	ENSG00000010244	ZNF207	7575.58	0.00344212	0.101728	0.0338366	0.973007	0.993788
240	ENSG00000010256	UQCRC1	7442.59	0.135169	0.238446	0.566875	0.570799	0.859823
241	ENSG00000010270	STARD3NL	1555.94	-0.0170022	0.162251	-0.10479	0.916543	0.979853
242	ENSG00000010278	CD9	7640.24	0.466172	0.503015	0.926757	0.354053	0.754849
243	ENSG00000010282	HHATL	0.279661	-0.493876	1.62591	-0.303754	0.761316	NA
244	ENSG00000010292	NCAPD2	4550.58	-0.440993	0.22234	-1.98341	0.0473214	0.398064
245	ENSG00000010295	IFFO1	1785.73	-0.0104866	0.10561	-0.0992954	0.920904	0.980488
246	ENSG00000010310	GIPR	731.52	-0.158476	0.475021	-0.333619	0.738667	0.925338
247	ENSG00000010318	PHF7	314.389	0.21261	0.185957	1.14333	0.252902	0.685685
248	ENSG00000010319	SEMA3G	375.476	0.665078	0.611832	1.08703	0.277025	0.703633
249	ENSG00000010322	NISCH	4408.83	0.0526379	0.174081	0.302376	0.762365	0.932721
250	ENSG00000010327	STAB1	7457.94	0.343861	0.638134	0.538854	0.589987	0.868902
251	ENSG00000010361	FUZ	280.877	0.153875	0.162918	0.944491	0.344919	0.74899
252	ENSG00000010379	SLC6A13	18.1734	-1.66834	0.772113	-2.16075	0.030715	0.350311
253	ENSG00000010404	IDS	10131.2	-0.0789281	0.16278	-0.484876	0.627764	0.884068
254	ENSG00000010438	PRSS3	5.10176	-0.410689	0.572708	-0.7171	0.473313	0.81614
255	ENSG00000010539	ZNF200	521.305	-0.0980674	0.135001	-0.72642	0.467581	0.813403
256	ENSG00000010610	CD4	6024.35	-0.187042	0.42616	-0.4389	0.660734	0.895785
257	ENSG00000010626	LRRC23	292.298	-0.124849	0.23543	-0.5303	0.595904	0.870397
258	ENSG00000010671	BTK	2363.94	0.323308	0.461497	0.700564	0.483575	0.821023
259	ENSG00000010704	HFE	370.501	-0.0579106	0.412012	-0.140556	0.888221	0.970714
260	ENSG00000010803	SCMH1	424.126	-0.117492	0.213174	-0.551155	0.581527	0.864968
261	ENSG00000010810	FYN	8858.17	-0.700546	0.292542	-2.39468	0.0166347	0.282388
262	ENSG00000010818	HIVEP2	3654.03	-0.160982	0.228945	-0.703148	0.481963	0.820107
263	ENSG00000010932	FMO1	3.42274	-2.08063	1.20271	-1.72995	0.0836394	0.480915
264	ENSG00000011007	ELOA	3363.55	0.182363	0.191683	0.951379	0.341412	0.747135
265	ENSG00000011009	LYPLA2	1905.85	-0.153096	0.107991	-1.41767	0.156287	0.591911
266	ENSG00000011021	CLCN6	1157.4	0.13353	0.139512	0.957122	0.338506	0.746045
267	ENSG00000011028	MRC2	1028.59	-0.129864	0.26177	-0.496098	0.619825	0.881908
268	ENSG00000011052	NME1-NME2	64.4678	0.183708	0.483927	0.379619	0.704228	0.911189
269	ENSG00000011083	SLC6A7	29.1161	-0.0144707	0.625272	-0.023143	0.981536	0.995764
270	ENSG00000011105	TSPAN9	47.1874	0.876517	0.394862	2.21981	0.026432	0.334635
271	ENSG00000011114	BTBD7	1865.08	0.26366	0.191401	1.37753	0.168348	0.604855
272	ENSG00000011132	APBA3	1428.02	-0.198345	0.289504	-0.685121	0.493268	0.826449
273	ENSG00000011143	MKS1	330.476	-0.0977832	0.149641	-0.653452	0.513465	0.833374
274	ENSG00000011198	ABHD5	1448.38	0.456335	0.240431	1.89798	0.0576981	0.427303
275	ENSG00000011201	ANOS1	174.73	0.321043	0.772848	0.415402	0.677848	0.901664
276	ENSG00000011243	AKAP8L	4058.86	-0.266401	0.234464	-1.13622	0.255866	0.687457
277	ENSG00000011258	MBTD1	953.155	0.0454428	0.148498	0.306016	0.759592	0.931513
278	ENSG00000011260	UTP18	1573.48	0.364448	0.219209	1.66256	0.0963998	0.506251
279	ENSG00000011275	RNF216	3431.95	0.102419	0.0873839	1.17205	0.241176	0.674116
280	ENSG00000011295	TTC19	1133.77	-0.179801	0.086868	-2.06982	0.0384689	0.37767
281	ENSG00000011304	PTBP1	10326.8	0.113983	0.0928474	1.22764	0.219582	0.656505
282	ENSG00000011332	DPF1	3.25034	1.01271	0.676986	1.49591	0.134678	0.566279
283	ENSG00000011347	SYT7	41.1567	0.694319	0.440413	1.57652	0.114906	0.535924
284	ENSG00000011376	LARS2	1299.98	0.155372	0.255254	0.608695	0.542727	0.847864
285	ENSG00000011405	PIK3C2A	2369.88	0.017533	0.202228	0.0866994	0.93091	0.9823
286	ENSG00000011422	PLAUR	10985.6	0.341845	0.384318	0.889484	0.373743	0.767758
287	ENSG00000011426	ANLN	823.989	-1.10635	0.318313	-3.47567	0.000509577	0.0768319
288	ENSG00000011451	WIZ	1408.44	-0.110429	0.0939263	-1.1757	0.239715	0.672442
289	ENSG00000011454	RABGAP1	2137.95	0.0775986	0.161072	0.481762	0.629975	0.885219
290	ENSG00000011465	DCN	1.56479	-0.470357	0.647413	-0.726518	0.467521	NA
291	ENSG00000011478	QPCTL	567.615	-0.428786	0.387147	-1.10755	0.268055	0.695808
292	ENSG00000011485	PPP5C	2100.55	-0.0270826	0.137123	-0.197506	0.843432	0.957619
293	ENSG00000011523	CEP68	1088.64	-0.00567759	0.126878	-0.0447483	0.964308	0.990904
294	ENSG00000011566	MAP4K3	1374.62	0.366536	0.278676	1.31527	0.188418	0.625347
295	ENSG00000011590	ZBTB32	440.942	-1.47345	0.70277	-2.09664	0.0360256	0.369088
296	ENSG00000011600	TYROBP	10294.8	0.328679	0.293242	1.12085	0.262353	0.69164
297	ENSG00000011638	TMEM159	545.703	-0.0245637	0.187046	-0.131324	0.895519	0.973209
298	ENSG00000011677	GABRA3	0.495077	-0.469399	1.29418	-0.362699	0.71683	NA
299	ENSG00000012048	BRCA1	1510.57	-0.871944	0.300905	-2.89774	0.00375867	0.172951
300	ENSG00000012061	ERCC1	2175.46	0.274029	0.183263	1.49527	0.134844	0.566492
301	ENSG00000012124	CD22	1704.04	0.270439	0.4355	0.620984	0.53461	0.844283
302	ENSG00000012171	SEMA3B	77.2766	-0.471038	0.585087	-0.805073	0.420777	0.791997
303	ENSG00000012174	MBTPS2	822.646	0.34844	0.310045	1.12384	0.261082	0.690811
304	ENSG00000012211	PRICKLE3	522.258	-0.26709	0.206657	-1.29243	0.196209	0.634108
305	ENSG00000012223	LTF	47.0559	-0.172001	0.370046	-0.464811	0.642067	0.889545
306	ENSG00000012232	EXTL3	1381.49	-0.154032	0.156808	-0.982294	0.325955	0.73732
307	ENSG00000012504	NR1H4	0.890897	-2.03592	2.19219	-0.928714	0.353038	NA
308	ENSG00000012660	ELOVL5	7509.42	0.022443	0.141614	0.15848	0.874078	0.96716
309	ENSG00000012779	ALOX5	1603.93	0.0925516	0.54103	0.171066	0.864172	0.964674
310	ENSG00000012817	KDM5D	1298.88	-1.39301	0.895524	-1.55552	0.119822	0.54514
311	ENSG00000012822	CALCOCO1	4576.94	0.256154	0.183856	1.39323	0.163551	0.599565
312	ENSG00000012963	UBR7	2527.06	-0.184288	0.160387	-1.14902	0.250548	0.683326
313	ENSG00000012983	MAP4K5	1934.84	0.155836	0.146011	1.06729	0.285842	0.709674
314	ENSG00000013016	EHD3	820.858	0.893582	0.439501	2.03317	0.042035	0.384835
315	ENSG00000013275	PSMC4	3114.98	-0.0312241	0.13075	-0.238807	0.811255	0.947059
316	ENSG00000013288	MAN2B2	4936.56	0.0741481	0.194826	0.380586	0.70351	0.911189
317	ENSG00000013293	SLC7A14	30.7563	0.748005	0.433184	1.72676	0.0842106	0.482433
318	ENSG00000013297	CLDN11	2.56839	0.312305	0.637218	0.490106	0.624059	0.882645
319	ENSG00000013306	SLC25A39	3298.75	-0.219752	0.151748	-1.44814	0.147578	0.581563
320	ENSG00000013364	MVP	11814.9	0.0566979	0.182972	0.309873	0.756658	0.930708
321	ENSG00000013374	NUB1	4156.08	-0.0720295	0.136688	-0.526962	0.59822	0.87176
322	ENSG00000013375	PGM3	1141.78	0.393405	0.223168	1.76282	0.0779311	0.469731
323	ENSG00000013392	RWDD2A	205.988	0.17472	0.196559	0.888894	0.37406	0.767992
324	ENSG00000013441	CLK1	9143.06	-0.0403356	0.440576	-0.0915519	0.927054	0.981545
325	ENSG00000013503	POLR3B	412.183	0.242184	0.330452	0.732887	0.463627	0.812289
326	ENSG00000013523	ANGEL1	2496.61	0.466214	0.315337	1.47847	0.139283	0.57165
327	ENSG00000013561	RNF14	1767.57	0.125348	0.244032	0.513656	0.607493	0.876387
328	ENSG00000013563	DNASE1L1	1803.71	0.296775	0.219832	1.35001	0.177013	0.613963
329	ENSG00000013573	DDX11	2905.41	-0.396298	0.260769	-1.51973	0.12858	0.557543
330	ENSG00000013583	HEBP1	1578.54	0.0238838	0.302425	0.0789742	0.937053	0.984004
331	ENSG00000013588	GPRC5A	41.5595	1.31905	0.605969	2.17677	0.0294977	0.346007
332	ENSG00000013619	MAMLD1	272.912	-0.612576	0.290694	-2.10729	0.0350923	0.366113
333	ENSG00000013725	CD6	4196.97	-0.368685	0.385588	-0.956164	0.33899	0.746052
334	ENSG00000013810	TACC3	5324.66	-0.585047	0.301906	-1.93785	0.052642	0.41381
335	ENSG00000014123	UFL1	2406.95	0.107026	0.181689	0.589062	0.55582	0.852852
336	ENSG00000014138	POLA2	999.84	-0.464301	0.199531	-2.32696	0.0199673	0.299309
337	ENSG00000014164	ZC3H3	1324.98	-0.556497	0.204447	-2.72197	0.00648946	0.218897
338	ENSG00000014216	CAPN1	6354.69	-0.0314822	0.155641	-0.202275	0.839702	0.956081
339	ENSG00000014257	ACP3	386.059	-0.122852	0.569184	-0.215838	0.829114	0.953102
340	ENSG00000014641	MDH1	5289.09	0.103391	0.259814	0.397942	0.690673	0.906495
341	ENSG00000014824	SLC30A9	2842.22	0.185537	0.255425	0.726385	0.467603	0.813403
342	ENSG00000014914	MTMR11	121.752	0.0290693	0.382778	0.0759428	0.939465	0.984291
343	ENSG00000014919	COX15	1842.04	0.142491	0.192593	0.739856	0.459388	0.809391
344	ENSG00000015133	CCDC88C	6858.15	-0.579939	0.285078	-2.03432	0.0419194	0.384811
345	ENSG00000015153	YAF2	681.198	-0.150986	0.177082	-0.852634	0.393862	0.778842
346	ENSG00000015171	ZMYND11	2913.24	0.013688	0.200143	0.0683913	0.945474	0.986013
347	ENSG00000015285	WAS	3092.52	-0.368261	0.159763	-2.30504	0.0211642	0.306577
348	ENSG00000015413	DPEP1	1.45982	2.30834	1.5163	1.52235	0.127921	NA
349	ENSG00000015475	BID	1581.42	0.0863059	0.271154	0.318292	0.750264	0.929138
350	ENSG00000015479	MATR3	11460	0.0502523	0.0648702	0.774659	0.438541	0.799915
351	ENSG00000015520	NPC1L1	10.3024	-0.683874	0.96574	-0.708135	0.478862	0.819134
352	ENSG00000015532	XYLT2	1206.96	-0.0981866	0.110733	-0.886697	0.375242	0.768809
353	ENSG00000015568	RGPD5	223.118	0.585333	0.355784	1.64519	0.0999304	0.513128
354	ENSG00000015592	STMN4	3.38825	-0.96643	1.02321	-0.944511	0.344908	0.74899
355	ENSG00000015676	NUDCD3	2291.3	0.0212112	0.15459	0.137209	0.890865	0.971117
356	ENSG00000016391	CHDH	180.165	-0.523223	0.301775	-1.73382	0.0829497	0.478933
357	ENSG00000016402	IL20RA	1.33957	1.51765	1.88343	0.805791	0.420364	NA
358	ENSG00000016864	GLT8D1	1021.57	-0.383817	0.11488	-3.34102	0.000834713	0.0938713
359	ENSG00000017260	ATP2C1	5324.85	0.139243	0.228142	0.610334	0.541641	0.847687
360	ENSG00000017427	IGF1	42.8034	-0.721408	0.467247	-1.54395	0.1226	0.548634
361	ENSG00000017483	SLC38A5	800.009	-0.671151	0.465734	-1.44106	0.149567	0.583431
362	ENSG00000017797	RALBP1	4985.85	-0.177241	0.101187	-1.75162	0.07984	0.473831
363	ENSG00000018189	RUFY3	1356.02	0.176331	0.163676	1.07732	0.281337	0.705775
364	ENSG00000018236	CNTN1	1.80447	-2.10189	0.950197	-2.21206	0.0269625	NA
365	ENSG00000018280	SLC11A1	8325.33	0.557017	0.459366	1.21258	0.225291	0.661873
366	ENSG00000018408	WWTR1	288.106	-0.415514	0.466079	-0.89151	0.372655	0.766744
367	ENSG00000018510	AGPS	5122.16	0.097738	0.302586	0.323009	0.746689	0.928163
368	ENSG00000018610	CXorf56	985.252	0.115083	0.0842781	1.36551	0.172091	0.608991
369	ENSG00000018625	ATP1A2	3.92495	-0.165463	0.537542	-0.307813	0.758224	0.931279
370	ENSG00000018699	TTC27	769.36	0.171377	0.269989	0.634754	0.525589	0.840175
371	ENSG00000018869	ZNF582	97.9974	0.266565	0.205796	1.29529	0.19522	0.632828
372	ENSG00000019102	VSIG2	1.88142	-0.644465	0.629478	-1.02381	0.305926	NA
373	ENSG00000019144	PHLDB1	610.927	0.162805	0.259234	0.628023	0.529989	0.842616
374	ENSG00000019169	MARCO	1017.53	0.348503	0.742675	0.469254	0.638888	0.888289
375	ENSG00000019186	CYP24A1	3.30503	-0.327851	0.700483	-0.468035	0.63976	0.888581
376	ENSG00000019485	PRDM11	219.23	0.10567	0.24652	0.428648	0.668179	0.899045
377	ENSG00000019505	SYT13	2.15472	-2.65371	0.951982	-2.78757	0.00531056	NA
378	ENSG00000019549	SNAI2	2.37896	-0.583798	0.652757	-0.894357	0.371131	0.765061
379	ENSG00000019582	CD74	144895	0.0717308	0.32892	0.218079	0.827367	0.952729
380	ENSG00000019991	HGF	66.2336	-1.00055	0.670003	-1.49334	0.135347	0.566863
381	ENSG00000019995	ZRANB1	2153.03	0.0607862	0.108873	0.55832	0.576626	0.862896
382	ENSG00000020129	NCDN	987.433	0.039849	0.129352	0.308067	0.758031	0.931211
383	ENSG00000020181	ADGRA2	74.7553	0.732882	0.466456	1.57117	0.116143	0.539264
384	ENSG00000020219	CCT8L1P	0.449412	-0.386146	1.86971	-0.206527	0.836379	NA
385	ENSG00000020256	ZFP64	557.114	-0.134559	0.226234	-0.594779	0.551991	0.851196
386	ENSG00000020426	MNAT1	641.686	-0.51949	0.243311	-2.13509	0.032754	0.35672
387	ENSG00000020577	SAMD4A	1045.75	-0.00992761	0.384132	-0.0258443	0.979382	0.995764
388	ENSG00000020633	RUNX3	8766.28	-0.521919	0.302592	-1.72483	0.0845586	0.483198
389	ENSG00000020922	MRE11	1889.23	-0.0680047	0.152998	-0.444481	0.656695	0.894418
390	ENSG00000021300	PLEKHB1	287.727	0.325275	0.290574	1.11942	0.26296	0.69237
391	ENSG00000021355	SERPINB1	3920.63	-0.344838	0.12049	-2.86195	0.00421038	0.181548
392	ENSG00000021461	CYP3A43	5.98879	-0.286246	0.596098	-0.480199	0.631086	0.885229
393	ENSG00000021488	SLC7A9	14.4786	-0.755574	0.654591	-1.15427	0.24839	0.681015
394	ENSG00000021574	SPAST	1414.33	-0.0264198	0.19974	-0.132271	0.89477	0.972988
395	ENSG00000021645	NRXN3	16.6772	-0.454638	0.372772	-1.21961	0.222611	0.659591
396	ENSG00000021762	OSBPL5	1140.06	-0.43672	0.173983	-2.51013	0.0120686	0.255994
397	ENSG00000021776	AQR	2957.22	-0.133817	0.155211	-0.86216	0.3886	0.776018
398	ENSG00000021826	CPS1	89.1375	-0.587352	0.287418	-2.04355	0.040998	0.384304
399	ENSG00000021852	C8B	0.141397	-0.22977	2.90867	-0.0789948	0.937037	NA
400	ENSG00000022267	FHL1	829.474	-0.17953	0.390427	-0.459829	0.645639	0.890378
401	ENSG00000022277	RTF2	4848.51	0.0583572	0.15667	0.372484	0.709533	0.913527
402	ENSG00000022556	NLRP2	926.795	-0.00198044	0.295757	-0.00669617	0.994657	0.999183
403	ENSG00000022567	SLC45A4	1059.76	-0.0909478	0.240134	-0.378738	0.704883	0.911451
404	ENSG00000022840	RNF10	6129.16	-0.0570954	0.104137	-0.548271	0.583506	0.865791
405	ENSG00000022976	ZNF839	721.041	-0.584111	0.237479	-2.45963	0.013908	0.267826
406	ENSG00000023041	ZDHHC6	1875.96	0.0503868	0.104552	0.481931	0.629855	0.885194
407	ENSG00000023171	GRAMD1B	953.006	-0.985565	0.324435	-3.03779	0.00238319	0.148551
408	ENSG00000023191	RNH1	9332.55	0.236069	0.275656	0.856391	0.391782	0.777663
409	ENSG00000023228	NDUFS1	5874.5	0.243102	0.294951	0.824211	0.40982	0.787164
410	ENSG00000023287	RB1CC1	3267.08	0.186677	0.220385	0.847048	0.396968	0.780262
411	ENSG00000023318	ERP44	4571.17	-0.00999137	0.146046	-0.0684124	0.945457	0.986013
412	ENSG00000023330	ALAS1	21300.5	0.556964	0.324519	1.71627	0.0861122	0.486245
413	ENSG00000023445	BIRC3	7176.38	-0.100118	0.219425	-0.456275	0.648192	0.890852
414	ENSG00000023516	AKAP11	3202.88	-0.112097	0.240307	-0.466472	0.640878	0.889095
415	ENSG00000023572	GLRX2	762.813	0.232514	0.176774	1.31532	0.188403	0.625347
416	ENSG00000023608	SNAPC1	447.103	-0.662982	0.352043	-1.88324	0.0596677	0.431741
417	ENSG00000023697	DERA	1151.57	0.0721487	0.248075	0.290835	0.771178	0.935373
418	ENSG00000023734	STRAP	3874.58	0.171382	0.145483	1.17801	0.238791	0.671736
419	ENSG00000023839	ABCC2	122.378	-0.0772936	0.346748	-0.22291	0.823606	0.951338
420	ENSG00000023892	DEF6	3797.55	-0.346272	0.286815	-1.2073	0.227316	0.663236
421	ENSG00000023902	PLEKHO1	8905.95	0.414145	0.150469	2.75235	0.00591691	0.21508
422	ENSG00000023909	GCLM	2156.54	0.0773337	0.234966	0.329128	0.742059	0.926266
423	ENSG00000024048	UBR2	4328.35	-0.0486232	0.116534	-0.417244	0.6765	0.901639
424	ENSG00000024422	EHD2	30.5574	0.196578	0.36224	0.542675	0.587354	0.86789
425	ENSG00000024526	DEPDC1	368.868	-1.06178	0.466981	-2.27371	0.0229833	0.317532
426	ENSG00000024862	CCDC28A	924.992	-0.222677	0.174714	-1.27453	0.202477	0.639793
427	ENSG00000025039	RRAGD	2698.25	0.197412	0.361855	0.545557	0.585371	0.867013
428	ENSG00000025156	HSF2	474.56	-0.295795	0.227029	-1.3029	0.19261	0.630986
429	ENSG00000025293	PHF20	2820.95	-0.056158	0.0792768	-0.70838	0.478709	0.819088
430	ENSG00000025423	HSD17B6	35.9174	-0.0722673	0.494184	-0.146236	0.883735	0.969957
431	ENSG00000025434	NR1H3	10251.2	0.448092	0.400134	1.11985	0.262776	0.692032
432	ENSG00000025708	TYMP	9693.45	0.139702	0.230859	0.60514	0.545086	0.84868
433	ENSG00000025770	NCAPH2	1740.36	-0.576669	0.243622	-2.36707	0.0179298	0.287868
434	ENSG00000025772	TOMM34	1025.47	-0.0455692	0.179979	-0.253191	0.80012	0.944555
435	ENSG00000025796	SEC63	5582.14	0.17421	0.161298	1.08005	0.28012	0.70529
436	ENSG00000025800	KPNA6	4295.96	0.00900889	0.120968	0.0744731	0.940634	0.984706
437	ENSG00000026025	VIM	122402	0.318175	0.253089	1.25717	0.208694	0.645718
438	ENSG00000026036	RTEL1-TNFRSF6B	332.223	0.0267534	0.19608	0.136441	0.891472	0.971391
439	ENSG00000026103	FAS	1522.67	-0.603508	0.326001	-1.85125	0.0641343	0.441488
440	ENSG00000026297	RNASET2	2997.1	-0.180396	0.265416	-0.679672	0.496712	0.827721
441	ENSG00000026508	CD44	52447.5	0.260603	0.220464	1.18206	0.23718	0.67088
442	ENSG00000026559	KCNG1	49.5141	0.0439107	0.426596	0.102933	0.918016	0.979988
443	ENSG00000026652	AGPAT4	2215.24	0.0157654	0.182241	0.0865086	0.931062	0.9823
444	ENSG00000026751	SLAMF7	19104.1	0.240193	0.196348	1.2233	0.221217	0.657998
445	ENSG00000026950	BTN3A1	6298.64	0.159003	0.253297	0.627732	0.530179	0.842711
446	ENSG00000027001	MIPEP	617.803	0.210089	0.405186	0.518499	0.60411	0.87502
447	ENSG00000027075	PRKCH	6285.06	-0.593547	0.255248	-2.32537	0.0200522	0.299954
448	ENSG00000027644	INSRR	43.4661	-0.88133	0.682053	-1.29217	0.196297	0.634108
449	ENSG00000027697	IFNGR1	5286.58	-0.00614696	0.338856	-0.0181403	0.985527	0.996613
450	ENSG00000027847	B4GALT7	652.642	-0.0118521	0.171054	-0.0692885	0.94476	0.985744
451	ENSG00000027869	SH2D2A	3260.94	-0.664868	0.521094	-1.27591	0.201988	0.639142
452	ENSG00000028116	VRK2	1006.57	0.120594	0.148222	0.813603	0.415873	0.789487
453	ENSG00000028137	TNFRSF1B	19447.6	0.0985899	0.122011	0.80804	0.419067	0.79117
454	ENSG00000028203	VEZT	1846.32	-0.0156293	0.136255	-0.114706	0.908678	0.978393
455	ENSG00000028277	POU2F2	1582.12	0.166206	0.211875	0.784457	0.432772	0.797162
456	ENSG00000028310	BRD9	1928.49	-0.350845	0.214385	-1.63652	0.101731	0.515318
457	ENSG00000028528	SNX1	6239.65	0.0760319	0.251337	0.302509	0.762264	0.932721
458	ENSG00000028839	TBPL1	474.547	-0.20871	0.268675	-0.776811	0.43727	0.79907
459	ENSG00000029153	ARNTL2	1034.94	-0.014829	0.288019	-0.051486	0.958938	0.989813
460	ENSG00000029363	BCLAF1	7922.69	0.0985206	0.116423	0.846231	0.397424	0.780262
461	ENSG00000029364	SLC39A9	2912.02	0.133562	0.223307	0.598109	0.549767	0.850402
462	ENSG00000029534	ANK1	294.927	0.240242	0.457854	0.524713	0.599783	0.872804
463	ENSG00000029639	TFB1M	354.231	-0.375423	0.200259	-1.87469	0.0608359	0.434821
464	ENSG00000029725	RABEP1	4351.2	0.282026	0.189825	1.48572	0.137353	0.569374
465	ENSG00000029993	HMGB3	912.84	-0.244455	0.214309	-1.14067	0.254008	0.685945
466	ENSG00000030066	NUP160	2312.46	0.136334	0.158394	0.860728	0.389388	0.776226
467	ENSG00000030110	BAK1	2846.75	-0.333507	0.147783	-2.25674	0.0240243	0.321777
468	ENSG00000030304	MUSK	1.44276	-1.14569	1.15964	-0.987973	0.323166	NA
469	ENSG00000030419	IKZF2	927.882	-0.139057	0.287953	-0.482917	0.629155	0.885028
470	ENSG00000030582	GRN	47423.6	-0.0858487	0.423722	-0.202606	0.839443	0.956048
471	ENSG00000031003	FAM13B	3930.38	0.272749	0.250876	1.08718	0.276955	0.703633
472	ENSG00000031081	ARHGAP31	7110.19	0.643407	0.431571	1.49085	0.136002	0.567942
473	ENSG00000031691	CENPQ	142.793	-0.113045	0.195211	-0.579091	0.562528	0.855687
474	ENSG00000031698	SARS1	6388.16	0.0257485	0.182565	0.141038	0.88784	0.970714
475	ENSG00000031823	RANBP3	2969.21	-0.0838831	0.0862013	-0.973108	0.3305	0.739988
476	ENSG00000032219	ARID4A	2995.79	-0.313811	0.157962	-1.98662	0.046964	0.397546
477	ENSG00000032389	EIPR1	782.552	-0.0182706	0.196028	-0.0932037	0.925742	0.981545
478	ENSG00000032444	PNPLA6	8601.97	-0.0221036	0.167856	-0.131682	0.895236	0.973037
479	ENSG00000032742	IFT88	270.731	-0.296777	0.135287	-2.19369	0.0282575	0.340548
480	ENSG00000033011	ALG1	1020.3	0.0910683	0.277094	0.328655	0.742416	0.926389
481	ENSG00000033030	ZCCHC8	2203.48	-0.125457	0.226343	-0.554279	0.579388	0.864041
482	ENSG00000033050	ABCF2	1234.83	0.258476	0.191959	1.34651	0.178137	0.615254
483	ENSG00000033100	CHPF2	2372.92	-0.06598	0.155586	-0.424074	0.671512	0.900015
484	ENSG00000033122	LRRC7	76.6903	0.296468	0.464174	0.6387	0.523018	0.838321
485	ENSG00000033170	FUT8	815.514	-0.801053	0.274629	-2.91686	0.00353576	0.171572
486	ENSG00000033178	UBA6	3196.99	-0.0773325	0.193961	-0.398701	0.690114	0.906189
487	ENSG00000033327	GAB2	2390.89	0.0867613	0.279653	0.310246	0.756374	0.930622
488	ENSG00000033627	ATP6V0A1	4855.21	0.369934	0.411359	0.899297	0.368495	0.763898
489	ENSG00000033800	PIAS1	3483.17	-0.00476302	0.11358	-0.0419354	0.96655	0.991807
490	ENSG00000033867	SLC4A7	3434.43	-0.241947	0.258244	-0.936892	0.348814	0.751386
491	ENSG00000034053	APBA2	1054.6	0.236557	0.317466	0.745142	0.456186	0.807573
492	ENSG00000034152	MAP2K3	4172.68	0.312202	0.15572	2.00489	0.0449753	0.391784
493	ENSG00000034510	TMSB10	31811.5	0.0664698	0.137153	0.484641	0.627931	0.884136
494	ENSG00000034533	ASTE1	409.775	-0.273122	0.144299	-1.89275	0.058391	0.429058
495	ENSG00000034677	RNF19A	4533.95	0.149004	0.148967	1.00024	0.317192	0.733262
496	ENSG00000034693	PEX3	426.468	-0.281189	0.174816	-1.60849	0.107729	0.524667
497	ENSG00000034713	GABARAPL2	2080.81	0.0408733	0.111133	0.367788	0.713031	0.915079
498	ENSG00000034971	MYOC	0.343742	-1.856	2.67203	-0.694603	0.487304	NA
499	ENSG00000035115	SH3YL1	695.293	0.302749	0.215154	1.40713	0.15939	0.595439
500	ENSG00000035141	FAM136A	1896.67	0.236544	0.14617	1.61828	0.105602	0.521866
501	ENSG00000035403	VCL	5244.74	0.260441	0.249269	1.04482	0.296106	0.715893
502	ENSG00000035499	DEPDC1B	227.336	-1.20481	0.422187	-2.85373	0.00432088	0.183509
503	ENSG00000035664	DAPK2	606.108	0.0878841	0.440189	0.199651	0.841754	0.957072
504	ENSG00000035681	NSMAF	4463.29	0.538217	0.227153	2.36941	0.0178166	0.28769
505	ENSG00000035687	ADSS2	2734.73	0.019156	0.124233	0.154194	0.877457	0.968105
506	ENSG00000035720	STAP1	326.315	-0.332351	0.411948	-0.806779	0.419794	0.791465
507	ENSG00000035862	TIMP2	22195.4	0.392837	0.460283	0.85347	0.393399	0.778812
508	ENSG00000035928	RFC1	2945.99	-0.0618968	0.171955	-0.35996	0.718877	0.917371
509	ENSG00000036054	TBC1D23	2141.97	0.191086	0.148606	1.28586	0.198492	0.635532
510	ENSG00000036257	CUL3	4061.51	0.00865481	0.083801	0.103278	0.917742	0.979988
511	ENSG00000036448	MYOM2	140.451	0.319861	0.418551	0.764211	0.444742	0.80296
512	ENSG00000036530	CYP46A1	48.8098	-1.13388	0.380652	-2.97877	0.00289406	0.156298
513	ENSG00000036549	AC118549.1	1454.08	0.113659	0.175092	0.649139	0.516249	0.834164
514	ENSG00000036565	SLC18A1	1.8148	-0.104037	0.681065	-0.152757	0.87859	NA
515	ENSG00000036672	USP2	1450.97	0.519193	0.569666	0.911399	0.362085	0.760406
516	ENSG00000036828	CASR	136.331	-0.553984	0.299416	-1.85022	0.0642821	0.44149
517	ENSG00000037042	TUBG2	522.281	-0.251941	0.323762	-0.778168	0.43647	0.798755
518	ENSG00000037241	RPL26L1	504.983	0.0112523	0.18723	0.0600986	0.952077	0.988447
519	ENSG00000037280	FLT4	195.574	-0.0758236	0.403022	-0.188138	0.850769	0.959877
520	ENSG00000037474	NSUN2	3591.73	0.125517	0.0833128	1.50658	0.131919	0.56252
521	ENSG00000037637	FBXO42	1381.07	-0.296673	0.114734	-2.58574	0.00971692	0.237371
522	ENSG00000037749	MFAP3	721.006	-0.0318966	0.226883	-0.140586	0.888197	0.970714
523	ENSG00000037757	MRI1	934.262	-0.050449	0.154217	-0.32713	0.74357	0.926993
524	ENSG00000037897	METTL1	822.368	0.540579	0.416594	1.29762	0.19442	0.63261
525	ENSG00000037965	HOXC8	1.72224	-1.60599	1.33686	-1.20131	0.22963	NA
526	ENSG00000038002	AGA	786.894	0.104185	0.250448	0.415995	0.677414	0.901653
527	ENSG00000038210	PI4K2B	1188.88	-0.246488	0.130718	-1.88564	0.0593431	0.431439
528	ENSG00000038219	BOD1L1	5917.52	-0.0382706	0.136215	-0.280957	0.778743	0.937329
529	ENSG00000038274	MAT2B	4200.35	-0.0925849	0.0985763	-0.93922	0.347618	0.750603
530	ENSG00000038295	TLL1	0.435849	-0.801986	1.4913	-0.537775	0.590733	NA
531	ENSG00000038358	EDC4	4306.72	0.0878818	0.173802	0.505643	0.613108	0.879249
532	ENSG00000038382	TRIO	4984.9	0.466629	0.295677	1.57817	0.114526	0.53551
533	ENSG00000038427	VCAN	367.708	0.684093	0.611284	1.11911	0.263094	0.692498
534	ENSG00000038532	CLEC16A	1935.64	0.162154	0.120427	1.34649	0.178144	0.615254
535	ENSG00000038945	MSR1	8532.66	-0.0918432	0.57006	-0.161112	0.872006	0.966631
536	ENSG00000039068	CDH1	50.4591	0.378621	0.384351	0.985092	0.324579	0.736425
537	ENSG00000039123	MTREX	3118.04	0.187559	0.22238	0.843416	0.398996	0.781329
538	ENSG00000039139	DNAH5	0.651149	-0.950406	1.21483	-0.782335	0.434018	NA
539	ENSG00000039319	ZFYVE16	8417.47	0.647229	0.313527	2.06435	0.0389848	0.378939
540	ENSG00000039523	RIPOR1	2989.92	0.106845	0.192707	0.554441	0.579277	0.864041
541	ENSG00000039560	RAI14	1561.98	1.34045	0.499752	2.68223	0.00731322	0.225387
542	ENSG00000039600	SOX30	4.30717	0.741489	0.701043	1.05769	0.290195	0.712427
543	ENSG00000039650	PNKP	1792.6	-0.0139877	0.136241	-0.102669	0.918226	0.980053
544	ENSG00000039987	BEST2	2.9286	-1.39028	1.29308	-1.07517	0.282296	0.707044
545	ENSG00000040199	PHLPP2	969.077	0.148768	0.199119	0.747131	0.454984	0.807299
546	ENSG00000040275	SPDL1	606.674	-0.274175	0.206502	-1.32771	0.184274	0.620742
547	ENSG00000040341	STAU2	1165.6	-0.467198	0.153604	-3.04158	0.00235338	0.147763
548	ENSG00000040487	SLC66A1	1392.1	0.62037	0.215891	2.87353	0.00405912	0.177308
549	ENSG00000040531	CTNS	4448.99	1.06834	0.39319	2.71711	0.0065854	0.220276
550	ENSG00000040608	RTN4R	386.17	-0.000337374	0.494599	-0.000682116	0.999456	0.999961
551	ENSG00000040633	PHF23	1831.75	0.095274	0.139468	0.683126	0.494527	0.826922
552	ENSG00000040731	CDH10	0.16935	0.937698	2.81347	0.333289	0.738916	NA
553	ENSG00000040933	INPP4A	4416.89	-0.431067	0.174208	-2.47444	0.0133445	0.266314
554	ENSG00000041353	RAB27B	125.659	-0.537403	0.280557	-1.91549	0.0554304	0.41931
555	ENSG00000041357	PSMA4	4898.32	0.0162779	0.10805	0.150652	0.88025	0.968888
556	ENSG00000041515	MYO16	23.1512	-2.18108	0.535481	-4.07312	4.63873e-05	0.0203177
557	ENSG00000041802	LSG1	1945.46	0.195851	0.223144	0.877688	0.380113	0.771145
558	ENSG00000041880	PARP3	693.11	0.0138961	0.134594	0.103244	0.917769	0.979988
559	ENSG00000041982	TNC	97.3201	0.376411	0.564922	0.666306	0.505215	0.830347
560	ENSG00000041988	THAP3	673.848	-0.42617	0.319889	-1.33224	0.18278	0.619758
561	ENSG00000042062	RIPOR3	79.2218	-0.218612	0.323235	-0.676324	0.498835	0.82776
562	ENSG00000042088	TDP1	1259.01	-0.018521	0.146439	-0.126476	0.899355	0.97479
563	ENSG00000042286	AIFM2	2626.06	0.284588	0.232097	1.22616	0.220139	0.657136
564	ENSG00000042304	C2orf83	4.48681	-0.642179	0.510663	-1.25754	0.208558	0.645702
565	ENSG00000042317	SPATA7	109.594	-0.520828	0.237917	-2.18912	0.0285885	0.341013
566	ENSG00000042429	MED17	1558.55	0.0773453	0.0909948	0.849996	0.395327	0.779497
567	ENSG00000042445	RETSAT	1799.29	0.04683	0.109623	0.427193	0.669239	0.899269
568	ENSG00000042493	CAPG	26049.7	0.00332165	0.456065	0.00728329	0.994189	0.999156
569	ENSG00000042753	AP2S1	2328.74	0.235801	0.274932	0.857669	0.391075	0.777621
570	ENSG00000042781	USH2A	0.145976	-1.04063	1.9887	-0.52327	0.600786	NA
571	ENSG00000042832	NA	44.1388	0.265118	0.618499	0.428647	0.66818	0.899045
572	ENSG00000042980	ADAM28	711.199	0.630111	0.41076	1.53401	0.125027	0.552428
573	ENSG00000043039	BARX2	10.8724	-0.124314	0.232235	-0.535293	0.592447	0.869509
574	ENSG00000043093	DCUN1D1	2373.54	0.143317	0.212924	0.673093	0.500888	0.828376
575	ENSG00000043143	JADE2	3167.71	-0.156303	0.232357	-0.672687	0.501147	0.828511
576	ENSG00000043355	ZIC2	3.8781	0.304573	0.673546	0.452194	0.651129	0.892054
577	ENSG00000043462	LCP2	8719.62	-0.264305	0.143505	-1.84177	0.0655081	0.445634
578	ENSG00000043514	TRIT1	407.636	0.160023	0.127449	1.25558	0.209267	0.646204
579	ENSG00000043591	ADRB1	37.2498	-0.442089	0.640677	-0.690034	0.490173	0.825252
580	ENSG00000044090	CUL7	1469.12	-0.0172553	0.117192	-0.147239	0.882944	0.96989
581	ENSG00000044115	CTNNA1	10632	0.445967	0.329675	1.35275	0.176136	0.612851
582	ENSG00000044446	PHKA2	1663.74	0.0672556	0.116294	0.578323	0.563046	0.85583
583	ENSG00000044459	CNTLN	469.1	0.130726	0.279145	0.468308	0.639564	0.888581
584	ENSG00000044574	HSPA5	41523.7	0.256129	0.25474	1.00546	0.314677	0.731281
585	ENSG00000046604	DSG2	110.91	-0.0890497	0.370674	-0.240237	0.810146	0.946867
586	ENSG00000046647	GEMIN8	234.273	0.0896235	0.215019	0.416817	0.676812	0.901653
587	ENSG00000046651	OFD1	3204.75	-0.374682	0.398894	-0.939304	0.347574	0.750603
588	ENSG00000046653	GPM6B	1.05122	-0.436556	0.863533	-0.505546	0.613175	NA
589	ENSG00000046774	MAGEC2	0.565466	-0.881661	0.761926	-1.15715	0.247212	NA
590	ENSG00000046889	PREX2	5.40904	-0.403085	0.401445	-1.00409	0.315337	0.731528
591	ENSG00000047056	WDR37	2742.63	0.0360593	0.124788	0.288964	0.772609	0.936129
592	ENSG00000047188	YTHDC2	1691.5	0.0253057	0.210384	0.120283	0.904259	0.97669
593	ENSG00000047230	CTPS2	302.034	-0.484278	0.212057	-2.28372	0.022388	0.314163
594	ENSG00000047249	ATP6V1H	5978.89	0.36583	0.296454	1.23402	0.217195	0.654366
595	ENSG00000047315	POLR2B	5613.8	0.177822	0.143609	1.23824	0.215629	0.65277
596	ENSG00000047346	FAM214A	1715.45	-0.110035	0.183236	-0.600507	0.548168	0.849638
597	ENSG00000047365	ARAP2	4480.48	-0.497965	0.201328	-2.47341	0.0133832	0.266446
598	ENSG00000047410	TPR	10355.3	-0.309494	0.133166	-2.32412	0.020119	0.300214
599	ENSG00000047457	NA	28.917	0.530552	0.644915	0.822669	0.410696	0.787575
600	ENSG00000047578	KIAA0556	1058.37	0.0738219	0.16288	0.453228	0.650385	0.891697
601	ENSG00000047579	DTNBP1	786.461	-0.193444	0.136064	-1.42172	0.155109	0.590952
602	ENSG00000047597	NA	37.2236	-0.296422	0.318489	-0.930713	0.352002	0.753645
603	ENSG00000047617	ANO2	2.39763	-0.266629	0.626686	-0.425458	0.670503	0.899727
604	ENSG00000047621	C12orf4	1542.28	0.00211147	0.298082	0.00708352	0.994348	0.999156
605	ENSG00000047634	SCML1	440.552	0.587392	0.276503	2.12436	0.03364	0.359365
606	ENSG00000047644	WWC3	2119.97	-0.842168	0.273965	-3.07399	0.00211214	0.14316
607	ENSG00000047648	ARHGAP6	110.832	0.259852	0.415443	0.625483	0.531654	0.843614
608	ENSG00000047662	FAM184B	3.31188	0.100145	0.635985	0.157464	0.874879	0.967228
609	ENSG00000047849	MAP4	8651.06	0.0681742	0.172438	0.395355	0.692581	0.907369
610	ENSG00000047932	GOPC	2008	-0.0146016	0.151013	-0.0966909	0.922972	0.980616
611	ENSG00000047936	ROS1	0.517538	-0.627006	1.41656	-0.442625	0.658037	NA
612	ENSG00000048028	USP28	2387.62	-0.687601	0.288933	-2.37979	0.0173223	0.285143
613	ENSG00000048052	HDAC9	691.496	0.743238	0.326743	2.27469	0.0229244	0.317081
614	ENSG00000048140	TSPAN17	3455.53	0.419955	0.303024	1.38588	0.165783	0.601887
615	ENSG00000048162	NOP16	619.779	0.356913	0.248969	1.43356	0.151697	0.585679
616	ENSG00000048342	CC2D2A	69.311	-0.284548	0.319567	-0.890418	0.373241	0.767194
617	ENSG00000048392	RRM2B	2116.91	-0.197823	0.174131	-1.13606	0.255932	0.687457
618	ENSG00000048405	ZNF800	1325.17	0.0676702	0.167867	0.403117	0.686862	0.904303
619	ENSG00000048462	TNFRSF17	4.97353	1.33237	0.832462	1.60052	0.109484	0.527299
620	ENSG00000048471	SNX29	2309.65	-0.168809	0.273052	-0.61823	0.536424	0.845071
621	ENSG00000048544	MRPS10	1720.07	0.183989	0.14759	1.24662	0.212537	0.649953
622	ENSG00000048545	GUCA1A	2.41139	0.988956	0.872638	1.1333	0.25709	0.68846
623	ENSG00000048649	RSF1	3657.29	-0.306017	0.257801	-1.18703	0.235217	0.669247
624	ENSG00000048707	VPS13D	5499.81	-0.163457	0.144805	-1.12881	0.258978	0.689905
625	ENSG00000048740	CELF2	7364.6	-0.333611	0.172928	-1.92919	0.0537069	0.415521
626	ENSG00000048828	FAM120A	13115.5	0.250949	0.238279	1.05317	0.292262	0.713466
627	ENSG00000048991	R3HDM1	2351.99	-0.0727394	0.19546	-0.372145	0.709785	0.913678
628	ENSG00000049089	COL9A2	971.103	-0.0911155	0.288422	-0.315911	0.75207	0.929284
629	ENSG00000049130	KITLG	227.343	0.271495	0.520971	0.521134	0.602274	0.874023
630	ENSG00000049167	ERCC8	304.269	-0.042007	0.237367	-0.176971	0.859531	0.963308
631	ENSG00000049192	ADAMTS6	74.3911	0.904384	0.329172	2.74745	0.00600608	0.215721
632	ENSG00000049239	H6PD	5000.14	0.134913	0.377444	0.357439	0.720763	0.918375
633	ENSG00000049245	VAMP3	4164.32	0.356422	0.289322	1.23192	0.217979	0.654673
634	ENSG00000049246	PER3	1008.98	0.199422	0.328911	0.60631	0.544309	0.848372
635	ENSG00000049247	UTS2	22.9382	0.666811	0.647027	1.03058	0.302739	0.721175
636	ENSG00000049249	TNFRSF9	3422.53	-1.54155	0.581719	-2.64998	0.00804959	0.230022
637	ENSG00000049283	EPN3	3.24185	-0.244225	0.684713	-0.356682	0.72133	0.918534
638	ENSG00000049323	LTBP1	85.9876	-0.339272	0.384797	-0.881691	0.377944	0.770597
639	ENSG00000049449	RCN1	2354.61	0.0929196	0.219537	0.423252	0.672111	0.9004
640	ENSG00000049540	ELN	2.14126	-0.68484	0.807273	-0.848337	0.39625	NA
641	ENSG00000049541	RFC2	1246.75	-0.58545	0.241493	-2.42429	0.0153383	0.274854
642	ENSG00000049618	ARID1B	3824.69	-0.226661	0.107911	-2.10044	0.0356898	0.368759
643	ENSG00000049656	CLPTM1L	3619.61	0.0927178	0.16468	0.563019	0.573422	0.861331
644	ENSG00000049759	NEDD4L	512.329	-0.0481197	0.440245	-0.109302	0.912963	0.979425
645	ENSG00000049768	FOXP3	245.556	1.56735	0.493122	3.17841	0.00148084	0.124302
646	ENSG00000049769	PPP1R3F	207.251	-0.250372	0.312159	-0.802066	0.422515	0.792635
647	ENSG00000049860	HEXB	16082.5	0.0385828	0.392314	0.0983469	0.921657	0.980488
648	ENSG00000049883	PTCD2	434.564	0.186964	0.167478	1.11635	0.264271	0.693322
649	ENSG00000050030	NEXMIF	10.241	0.401517	0.536763	0.748034	0.45444	0.807167
650	ENSG00000050130	JKAMP	1702.61	0.156963	0.251307	0.624588	0.532241	0.843732
651	ENSG00000050165	DKK3	43.1134	0.662352	0.50509	1.31136	0.189738	0.626752
652	ENSG00000050327	ARHGEF5	320.278	-0.206671	0.289795	-0.713164	0.475744	0.817274
653	ENSG00000050344	NFE2L3	668.737	-0.129106	0.208622	-0.618852	0.536014	0.844838
654	ENSG00000050393	MCUR1	1403.76	0.111385	0.172985	0.643899	0.519641	0.836214
655	ENSG00000050405	LIMA1	2105.68	-0.016078	0.259337	-0.0619965	0.950566	0.988023
656	ENSG00000050426	LETMD1	1516.12	-0.0661666	0.162089	-0.408212	0.683118	0.90298
657	ENSG00000050438	SLC4A8	1261.55	-0.0377702	0.245422	-0.153899	0.877689	0.968105
658	ENSG00000050555	LAMC3	16.6321	0.661341	0.57294	1.15429	0.24838	0.681015
659	ENSG00000050628	PTGER3	21.3537	-1.36174	0.600476	-2.26776	0.0233439	0.319241
660	ENSG00000050730	TNIP3	310.973	0.216531	0.460502	0.470206	0.638208	0.888224
661	ENSG00000050748	MAPK9	1741.9	-0.147132	0.153857	-0.956288	0.338927	0.746045
662	ENSG00000050767	COL23A1	515.308	1.04486	0.547397	1.90879	0.0562895	0.422273
663	ENSG00000050820	BCAR1	1163.15	-0.255499	0.539799	-0.473322	0.635983	0.887512
664	ENSG00000051009	FAM160A2	1023.61	0.0444586	0.095404	0.466004	0.641213	0.889346
665	ENSG00000051108	HERPUD1	6383.12	0.2666	0.205501	1.29732	0.194522	0.63261
666	ENSG00000051128	HOMER3	764.934	0.16538	0.452495	0.365485	0.714749	0.915715
667	ENSG00000051180	RAD51	596.832	-0.981949	0.378833	-2.59203	0.00954102	0.235892
668	ENSG00000051341	POLQ	738.38	-1.00861	0.362288	-2.78401	0.0053692	0.205279
669	ENSG00000051382	PIK3CB	4451.48	0.473468	0.376578	1.25729	0.208648	0.645718
670	ENSG00000051523	CYBA	10930.9	0.0674456	0.211079	0.319528	0.749326	0.92904
671	ENSG00000051596	THOC3	1000.71	-0.20634	0.188851	-1.09261	0.274566	0.70214
672	ENSG00000051620	HEBP2	1234.34	-0.394044	0.204151	-1.93016	0.0535868	0.415481
673	ENSG00000051825	MPHOSPH9	1836.51	-0.531992	0.260739	-2.04032	0.0413184	0.384758
674	ENSG00000052126	PLEKHA5	475.521	-0.583182	0.265637	-2.19541	0.0281341	0.340548
675	ENSG00000052344	PRSS8	6.86566	0.941238	0.792099	1.18828	0.234722	0.668776
676	ENSG00000052723	SIKE1	1506.46	-0.237488	0.178094	-1.3335	0.182369	0.619511
677	ENSG00000052749	RRP12	1727.83	0.78797	0.181904	4.3318	1.47895e-05	0.0119859
678	ENSG00000052795	FNIP2	11460.9	0.53463	0.393436	1.35887	0.174187	0.611467
679	ENSG00000052802	MSMO1	2235.3	0.245078	0.358923	0.682816	0.494723	0.826922
680	ENSG00000052841	TTC17	3384.75	0.0258203	0.110906	0.232813	0.815907	0.948668
681	ENSG00000053108	FSTL4	6.57705	-0.0665233	0.552059	-0.1205	0.904087	0.97669
682	ENSG00000053254	FOXN3	6013.71	-0.0365507	0.193988	-0.188417	0.850549	0.959877
683	ENSG00000053328	METTL24	1.51351	0.785785	0.705619	1.11361	0.265446	NA
684	ENSG00000053371	AKR7A2	1693.79	0.394736	0.221556	1.78165	0.074806	0.464121
685	ENSG00000053372	MRTO4	2328.19	0.570307	0.282772	2.01684	0.0437118	0.388852
686	ENSG00000053438	NNAT	8.16835	-2.61483	0.72323	-3.61549	0.000299779	0.0592916
687	ENSG00000053501	USE1	968.979	-0.295983	0.278715	-1.06195	0.288257	0.710942
688	ENSG00000053524	MCF2L2	200.432	-0.551239	0.369351	-1.49245	0.13558	0.56729
689	ENSG00000053702	NRIP2	4.95834	-0.192337	0.59032	-0.325818	0.744562	0.927258
690	ENSG00000053747	LAMA3	65.4034	1.34018	0.621893	2.155	0.0311617	0.35226
691	ENSG00000053770	AP5M1	2315.32	0.113578	0.209717	0.541578	0.588109	0.868115
692	ENSG00000053900	ANAPC4	1325.47	0.0132504	0.149951	0.0883646	0.929587	0.981879
693	ENSG00000053918	KCNQ1	492.775	-0.155297	0.351585	-0.441705	0.658703	0.894859
694	ENSG00000054116	TRAPPC3	1679.49	-0.000780453	0.140562	-0.00555238	0.99557	0.999183
695	ENSG00000054118	THRAP3	9209.68	-0.0117662	0.143315	-0.0821005	0.934567	0.983369
696	ENSG00000054148	PHPT1	1526.16	-0.0121383	0.157696	-0.0769732	0.938645	0.98426
697	ENSG00000054179	ENTPD2	5.80139	-1.93861	1.00399	-1.93092	0.0534935	0.415481
698	ENSG00000054219	LY75	2360.18	0.123487	0.264032	0.467699	0.64	0.888636
699	ENSG00000054267	ARID4B	4268	-0.322292	0.178025	-1.81038	0.0702368	0.455519
700	ENSG00000054277	OPN3	1392.26	0.63536	0.357021	1.77961	0.075139	0.465053
701	ENSG00000054282	SDCCAG8	1552.35	0.397412	0.239595	1.65868	0.0971802	0.50799
702	ENSG00000054356	PTPRN	32.1387	0.294614	0.526292	0.559792	0.575621	0.862512
703	ENSG00000054392	HHAT	246.562	0.218288	0.463568	0.470887	0.637721	0.887874
704	ENSG00000054523	KIF1B	6930.7	0.461712	0.328824	1.40413	0.160279	0.596442
705	ENSG00000054598	FOXC1	46.9716	-0.708898	0.547257	-1.29537	0.195194	0.632828
706	ENSG00000054611	TBC1D22A	1871.28	0.172164	0.19791	0.869909	0.38435	0.773669
707	ENSG00000054654	SYNE2	11983.8	-0.49519	0.34864	-1.42035	0.155507	0.591303
708	ENSG00000054690	PLEKHH1	75.1682	0.579611	0.300242	1.93048	0.0535476	0.415481
709	ENSG00000054793	ATP9A	982.674	0.408999	0.364025	1.12355	0.261206	0.690811
710	ENSG00000054938	CHRDL2	0.592912	-0.454445	1.46192	-0.310854	0.755912	NA
711	ENSG00000054965	FAM168A	1555.04	-0.26186	0.188997	-1.38552	0.165893	0.601887
712	ENSG00000054967	RELT	2229.53	0.240696	0.144145	1.66982	0.0949552	0.50309
713	ENSG00000054983	GALC	2425.91	-0.325967	0.200191	-1.62828	0.103466	0.518031
714	ENSG00000055044	NOP58	3836.4	-0.0749366	0.209386	-0.357888	0.720427	0.918365
715	ENSG00000055070	SZRD1	6767.72	0.166297	0.164676	1.00984	0.312571	0.729316
716	ENSG00000055118	KCNH2	69.3323	-0.259274	0.640376	-0.404878	0.685567	0.903546
717	ENSG00000055130	CUL1	3486.35	-0.0610125	0.100165	-0.609122	0.542443	0.847687
718	ENSG00000055147	FAM114A2	1069.96	0.0926244	0.183116	0.505824	0.61298	0.879167
719	ENSG00000055163	CYFIP2	9793.2	-0.180404	0.338087	-0.533601	0.593617	0.869529
720	ENSG00000055208	TAB2	7045.42	-0.0399453	0.101616	-0.393102	0.694244	0.908111
721	ENSG00000055211	GINM1	1435.26	0.032243	0.147215	0.21902	0.826635	0.952718
722	ENSG00000055332	EIF2AK2	3543.62	-0.227762	0.209683	-1.08622	0.277382	0.703774
723	ENSG00000055483	USP36	3577.12	0.0119811	0.152401	0.0786159	0.937338	0.984004
724	ENSG00000055609	KMT2C	8769.91	-0.0279935	0.112404	-0.249042	0.803328	0.945041
725	ENSG00000055732	MCOLN3	561.344	0.193392	0.549218	0.352122	0.724747	0.919412
726	ENSG00000055813	CCDC85A	4.23265	-0.804311	0.928499	-0.866249	0.386354	0.775191
727	ENSG00000055917	PUM2	5475.28	-0.086047	0.178543	-0.481939	0.629849	0.885194
728	ENSG00000055950	MRPL43	1047.36	0.0828725	0.111963	0.740176	0.459193	0.809334
729	ENSG00000055955	ITIH4	346.395	0.361006	0.354138	1.01939	0.308016	0.725684
730	ENSG00000055957	ITIH1	14.2391	0.979856	0.631777	1.55095	0.120913	0.546665
731	ENSG00000056050	HPF1	490.864	-0.475096	0.170723	-2.78285	0.00538844	0.2057
732	ENSG00000056097	ZFR	5362.97	0.145299	0.105203	1.38113	0.167239	0.603539
733	ENSG00000056277	ZNF280C	253.119	-0.149179	0.161882	-0.921531	0.356773	0.757435
734	ENSG00000056487	PHF21B	0.773412	-2.16991	1.69908	-1.27711	0.201563	NA
735	ENSG00000056558	TRAF1	5277.85	-0.0717654	0.250019	-0.28704	0.774082	0.936329
736	ENSG00000056586	RC3H2	3068.71	-0.188132	0.196731	-0.95629	0.338926	0.746045
737	ENSG00000056736	IL17RB	190.85	-0.0759392	0.583247	-0.130201	0.896408	0.973581
738	ENSG00000056972	TRAF3IP2	1068.38	0.320282	0.242364	1.3215	0.186336	0.622516
739	ENSG00000056998	GYG2	2.64201	-0.849661	0.997481	-0.851807	0.394321	0.779094
740	ENSG00000057019	DCBLD2	168.443	-0.676808	0.279857	-2.41841	0.0155887	0.276215
741	ENSG00000057252	SOAT1	16350.3	0.332801	0.425512	0.782119	0.434144	0.79749
742	ENSG00000057294	PKP2	29.6537	1.12483	0.439343	2.56026	0.0104595	0.242704
743	ENSG00000057468	MSH4	9.64565	-1.10217	0.527096	-2.09102	0.0365259	0.3698
744	ENSG00000057593	NA	3.37466	-0.389647	0.634295	-0.614299	0.539018	0.846306
745	ENSG00000057608	GDI2	14554.5	0.165026	0.181936	0.907055	0.364378	0.761388
746	ENSG00000057657	PRDM1	3208.53	-0.501653	0.254911	-1.96796	0.0490732	0.403687
747	ENSG00000057663	ATG5	1175.13	0.0940258	0.118718	0.792009	0.428355	0.795945
748	ENSG00000057704	TMCC3	1072.78	0.717003	0.301996	2.37421	0.0175866	0.287068
749	ENSG00000057757	PITHD1	2472.51	-0.184379	0.200248	-0.920754	0.357179	0.757625
750	ENSG00000057935	MTA3	664.299	-0.271618	0.209595	-1.29592	0.195004	0.63261
751	ENSG00000058056	USP13	312.869	-0.843649	0.214777	-3.92802	8.5647e-05	0.0311811
752	ENSG00000058063	ATP11B	6300.35	-0.0265502	0.202916	-0.130844	0.895899	0.973352
753	ENSG00000058085	LAMC2	24.414	-0.308006	0.374877	-0.821617	0.411295	0.787694
754	ENSG00000058091	CDK14	1782.81	0.777147	0.435104	1.78612	0.0740799	0.46237
755	ENSG00000058262	SEC61A1	15233.1	0.178652	0.225042	0.793861	0.427276	0.795589
756	ENSG00000058272	PPP1R12A	6382.26	-0.213138	0.172727	-1.23396	0.217218	0.654366
757	ENSG00000058335	RASGRF1	172.3	0.461661	0.592299	0.77944	0.435721	0.798342
758	ENSG00000058404	CAMK2B	106.37	0.363836	0.588329	0.618424	0.536296	0.845009
759	ENSG00000058453	CROCC	1446.59	0.218924	0.229476	0.954015	0.340076	0.746797
760	ENSG00000058600	POLR3E	1798.18	0.0874888	0.111887	0.781937	0.434251	0.79749
761	ENSG00000058668	ATP2B4	8391.6	-0.514936	0.291351	-1.7674	0.0771605	0.469009
762	ENSG00000058673	ZC3H11A	8363.72	-0.0657814	0.175262	-0.375331	0.707414	0.912823
763	ENSG00000058729	RIOK2	962.149	0.14587	0.155058	0.940748	0.346834	0.750468
764	ENSG00000058799	YIPF1	987.418	-0.0370594	0.0869184	-0.42637	0.669838	0.899423
765	ENSG00000058804	NDC1	1334.55	0.180107	0.218897	0.822792	0.410626	0.787562
766	ENSG00000058866	DGKG	223.972	0.144451	0.434613	0.332367	0.739612	0.925525
767	ENSG00000059122	FLYWCH1	1988.95	0.214008	0.204574	1.04611	0.295509	0.715515
768	ENSG00000059145	UNKL	1176.77	-0.229746	0.260056	-0.88345	0.376993	0.769995
769	ENSG00000059377	TBXAS1	2816.55	0.0857242	0.355693	0.241006	0.80955	0.946839
770	ENSG00000059378	PARP12	3778.29	0.186394	0.158339	1.17718	0.239123	0.672101
771	ENSG00000059573	ALDH18A1	1340.69	-0.179384	0.170505	-1.05208	0.292763	0.713727
772	ENSG00000059588	TARBP1	1307.63	0.161032	0.143668	1.12086	0.262348	0.69164
773	ENSG00000059691	GATB	1129.19	0.384401	0.324877	1.18322	0.236722	0.670688
774	ENSG00000059728	MXD1	4151.9	-0.0262082	0.334146	-0.0784335	0.937483	0.984042
775	ENSG00000059758	CDK17	1935.33	0.128536	0.163667	0.78535	0.432249	0.796922
776	ENSG00000059769	DNAJC25	435.254	0.0363024	0.211057	0.172003	0.863435	0.964282
777	ENSG00000059804	SLC2A3	11067.8	-0.555463	0.368694	-1.50657	0.131922	0.56252
778	ENSG00000059915	PSD	125.05	0.0706119	0.261656	0.269866	0.787264	0.939703
779	ENSG00000060069	CTDP1	1760.23	-0.0689071	0.0972144	-0.708815	0.478439	0.818916
780	ENSG00000060138	YBX3	2748.47	0.166907	0.207611	0.803939	0.421432	0.79229
781	ENSG00000060140	STYK1	334.513	-1.15482	0.595167	-1.94033	0.0523393	0.41299
782	ENSG00000060237	WNK1	20103.6	0.0117605	0.262375	0.0448234	0.964248	0.990904
783	ENSG00000060339	CCAR1	4836.39	-0.380985	0.187076	-2.03653	0.0416971	0.384811
784	ENSG00000060491	OGFR	4911.16	-0.35757	0.173082	-2.06589	0.0388387	0.37862
785	ENSG00000060558	GNA15	1930.43	-0.093156	0.277382	-0.33584	0.736991	0.92446
786	ENSG00000060566	CREB3L3	255.667	-0.899062	0.610182	-1.47343	0.140634	0.574021
787	ENSG00000060642	PIGV	359.244	-0.172788	0.165141	-1.0463	0.29542	0.715515
788	ENSG00000060656	PTPRU	46.2269	0.163614	0.449148	0.364278	0.715651	0.915975
789	ENSG00000060688	SNRNP40	1463.21	-0.157539	0.147595	-1.06737	0.285803	0.709674
790	ENSG00000060709	RIMBP2	0.680242	2.22642	1.25011	1.78098	0.074916	NA
791	ENSG00000060718	COL11A1	0.373977	-0.00380288	1.72283	-0.00220734	0.998239	NA
792	ENSG00000060749	QSER1	1694.28	0.176201	0.31376	0.561581	0.574402	0.861647
793	ENSG00000060762	MPC1	1278.96	0.161451	0.236675	0.682164	0.495135	0.826937
794	ENSG00000060971	ACAA1	3994.37	-0.0435069	0.187475	-0.232068	0.816485	0.948728
795	ENSG00000060982	BCAT1	5684.92	0.337844	0.414792	0.814492	0.415363	0.78943
796	ENSG00000061273	HDAC7	3757.9	-0.0432802	0.2446	-0.176943	0.859553	0.963308
797	ENSG00000061337	LZTS1	48.015	-1.91237	0.561376	-3.40658	0.00065783	0.0821169
798	ENSG00000061455	PRDM6	8.631	0.226072	0.741064	0.305065	0.760317	0.931936
799	ENSG00000061492	WNT8A	0.487694	0.948298	1.13954	0.832177	0.405309	NA
800	ENSG00000061656	SPAG4	101.845	-1.08236	0.663697	-1.6308	0.102932	0.517624
801	ENSG00000061676	NCKAP1	578.892	0.171547	0.369485	0.464287	0.642442	0.889545
802	ENSG00000061794	MRPS35	2166.5	0.342112	0.241211	1.41831	0.1561	0.591911
803	ENSG00000061918	GUCY1B1	130.837	-0.411717	0.214921	-1.91567	0.0554076	0.41931
804	ENSG00000061936	SFSWAP	2507.32	-0.184419	0.142823	-1.29124	0.19662	0.634528
805	ENSG00000061938	TNK2	3594.51	-0.194046	0.218603	-0.887664	0.374721	0.768465
806	ENSG00000061987	MON2	2470.72	0.0573182	0.193174	0.296718	0.766682	0.933707
807	ENSG00000062038	CDH3	76.9873	-0.315327	0.364808	-0.864363	0.387389	0.775795
808	ENSG00000062194	GPBP1	4931.51	-0.0715302	0.235704	-0.303474	0.761528	0.932283
809	ENSG00000062282	DGAT2	368.285	0.627303	0.478853	1.31001	0.190191	0.627254
810	ENSG00000062370	ZNF112	54.4757	0.434719	0.441679	0.984241	0.324997	0.736486
811	ENSG00000062485	NA	9625.45	0.187967	0.188543	0.996941	0.318793	0.734331
812	ENSG00000062524	LTK	116.794	-0.287878	0.524533	-0.548828	0.583124	0.86579
813	ENSG00000062582	MRPS24	1033.09	-0.0199129	0.16517	-0.12056	0.90404	0.97669
814	ENSG00000062598	ELMO2	4593.23	0.217257	0.121519	1.78785	0.0738008	0.461723
815	ENSG00000062650	WAPL	4805.5	0.136021	0.154161	0.882332	0.377597	0.770503
816	ENSG00000062716	VMP1	6119.25	-0.0703487	0.131129	-0.536485	0.591623	0.869322
817	ENSG00000062725	APPBP2	1920.29	0.030721	0.167192	0.183747	0.854212	0.96111
818	ENSG00000062822	POLD1	2846.66	-0.405881	0.236003	-1.71981	0.0854672	0.48528
819	ENSG00000063015	SEZ6	2.47112	-3.26497	1.91543	-1.70456	0.0882768	0.490523
820	ENSG00000063046	EIF4B	21348.7	-0.0120044	0.144851	-0.0828745	0.933951	0.98315
821	ENSG00000063127	SLC6A16	83.9199	0.287014	0.355372	0.807645	0.419295	0.791241
822	ENSG00000063169	BICRA	726.123	-0.346325	0.215262	-1.60886	0.107648	0.524667
823	ENSG00000063176	SPHK2	680.643	-0.07076	0.126114	-0.561078	0.574744	0.861757
824	ENSG00000063177	RPL18	11652.5	-0.285587	0.225937	-1.26401	0.206227	0.643591
825	ENSG00000063180	CA11	514.831	-0.20111	0.320025	-0.628421	0.529728	0.842422
826	ENSG00000063241	ISOC2	755.546	0.115979	0.284486	0.407679	0.683509	0.90298
827	ENSG00000063244	U2AF2	7141.46	0.120742	0.0782299	1.54343	0.122727	0.548775
828	ENSG00000063245	EPN1	2177.18	0.15764	0.207625	0.759255	0.4477	0.803925
829	ENSG00000063322	MED29	2015.87	-0.0712434	0.105743	-0.673739	0.500477	0.828267
830	ENSG00000063438	AHRR	107.564	0.234702	0.338716	0.692917	0.488362	0.824222
831	ENSG00000063587	ZNF275	807.164	0.0773792	0.101639	0.761311	0.446471	0.803753
832	ENSG00000063601	MTMR1	2199.91	0.111574	0.268178	0.416045	0.677377	0.901653
833	ENSG00000063660	GPC1	308.969	0.235343	0.358357	0.656727	0.511357	0.832998
834	ENSG00000063761	ADCK1	359.282	0.417423	0.377873	1.10466	0.269305	0.697093
835	ENSG00000063854	HAGH	1898.71	-0.0328728	0.125034	-0.262911	0.792619	0.941691
836	ENSG00000063978	RNF4	4484.61	0.127267	0.107945	1.179	0.238399	0.671548
837	ENSG00000064012	CASP8	2957.84	-0.228762	0.152627	-1.49883	0.133917	0.565492
838	ENSG00000064042	LIMCH1	145.878	1.81342	0.512285	3.53986	0.000400344	0.0694096
839	ENSG00000064102	INTS13	1546.46	-0.0289514	0.118955	-0.243382	0.80771	0.946327
840	ENSG00000064115	TM7SF3	2964.64	0.096856	0.315363	0.307126	0.758748	0.931496
841	ENSG00000064195	DLX3	7.49312	-0.43518	0.565763	-0.769193	0.441779	0.801501
842	ENSG00000064199	SPA17	150.821	-0.059539	0.303349	-0.196272	0.844397	0.958107
843	ENSG00000064201	TSPAN32	655.677	0.267351	0.356061	0.750857	0.452739	0.806418
844	ENSG00000064205	CCN5	0.193429	-0.966183	2.9796	-0.324266	0.745737	NA
845	ENSG00000064225	ST3GAL6	826.606	0.537559	0.468518	1.14736	0.251232	0.683924
846	ENSG00000064270	ATP2C2	3.77987	1.16961	0.828537	1.41165	0.158052	0.593838
847	ENSG00000064300	NGFR	96.4942	-0.235239	0.754644	-0.311722	0.755252	0.930407
848	ENSG00000064309	CDON	39.5773	-0.497632	0.396691	-1.25446	0.209676	0.646666
849	ENSG00000064313	TAF2	1651.08	-0.15399	0.162054	-0.950239	0.341991	0.747135
850	ENSG00000064393	HIPK2	11384.1	-0.0335042	0.201903	-0.165942	0.868202	0.965761
851	ENSG00000064419	TNPO3	4666.15	0.131483	0.162635	0.808458	0.418827	0.790956
852	ENSG00000064489	BORCS8-MEF2B	153.236	-0.00339757	0.380847	-0.00892107	0.992882	0.998788
853	ENSG00000064490	RFXANK	1155.17	-0.303045	0.23019	-1.3165	0.188007	0.624945
854	ENSG00000064545	TMEM161A	425.718	0.0439144	0.17627	0.249132	0.803259	0.945041
855	ENSG00000064547	LPAR2	2016.72	0.236504	0.272023	0.869428	0.384613	0.773904
856	ENSG00000064601	CTSA	14340.9	0.105541	0.340259	0.310177	0.756426	0.930622
857	ENSG00000064607	SUGP2	5905.08	-0.35167	0.238876	-1.47219	0.140971	0.574021
858	ENSG00000064651	SLC12A2	669.43	-0.276022	0.2129	-1.29649	0.194808	0.63261
859	ENSG00000064652	SNX24	571.919	0.0200902	0.379812	0.0528951	0.957816	0.989237
860	ENSG00000064655	EYA2	3.23755	-1.54638	0.972263	-1.59049	0.111724	0.530463
861	ENSG00000064666	CNN2	7388.65	-0.210093	0.151149	-1.38998	0.164536	0.600401
862	ENSG00000064687	ABCA7	4358.92	-0.431118	0.298568	-1.44395	0.148752	0.583397
863	ENSG00000064692	SNCAIP	47.4277	1.41121	0.59272	2.38091	0.01727	0.284972
864	ENSG00000064703	DDX20	893.089	0.103206	0.102765	1.00429	0.315237	0.731528
865	ENSG00000064726	BTBD1	4724.74	0.0995145	0.174506	0.570264	0.568498	0.858824
866	ENSG00000064763	FAR2	643.766	0.601152	0.292791	2.05318	0.0400551	0.382479
867	ENSG00000064787	BCAS1	45.6224	-0.46737	0.513154	-0.91078	0.362411	0.760429
868	ENSG00000064886	CHI3L2	112.622	0.384889	0.236984	1.62412	0.104351	0.519903
869	ENSG00000064932	SBNO2	3902.17	-0.0509682	0.195146	-0.26118	0.793953	0.942282
870	ENSG00000064933	PMS1	656.085	-0.0911335	0.165576	-0.550402	0.582044	0.865216
871	ENSG00000064961	HMG20B	9269.65	0.674209	0.309193	2.18054	0.0292172	0.345045
872	ENSG00000064989	CALCRL	35.9052	-0.535495	0.360474	-1.48553	0.137403	0.569374
873	ENSG00000064995	TAF11	978.732	-0.0386405	0.0749537	-0.515524	0.606187	0.875572
874	ENSG00000064999	ANKS1A	1096.06	-0.0968197	0.202379	-0.478407	0.632361	0.885506
875	ENSG00000065000	AP3D1	11298.8	0.185063	0.141093	1.31164	0.189642	0.626752
876	ENSG00000065029	ZNF76	2023	0.0549012	0.183121	0.299808	0.764324	0.933527
877	ENSG00000065054	SLC9A3R2	60.3	0.531565	0.251313	2.11515	0.0344172	0.36271
878	ENSG00000065057	NTHL1	152.305	-0.0971989	0.299707	-0.324314	0.745701	0.927944
879	ENSG00000065060	UHRF1BP1	2889.36	0.18746	0.29038	0.645567	0.51856	0.835411
880	ENSG00000065135	GNAI3	3868.66	0.0908957	0.175108	0.519085	0.603701	0.874754
881	ENSG00000065150	IPO5	3695.12	0.158527	0.143072	1.10802	0.267853	0.695808
882	ENSG00000065154	OAT	2105.41	0.0487476	0.242697	0.200858	0.84081	0.956863
883	ENSG00000065183	WDR3	1338.42	0.235489	0.280429	0.839744	0.401052	0.781896
884	ENSG00000065243	PKN2	1244.53	-0.277791	0.187131	-1.48447	0.137684	0.569577
885	ENSG00000065268	WDR18	868.14	-0.105905	0.222813	-0.47531	0.634566	0.886692
886	ENSG00000065308	TRAM2	1291.96	0.41039	0.322939	1.2708	0.203801	0.641221
887	ENSG00000065320	NTN1	16.3369	-0.516347	0.380777	-1.35604	0.175087	0.6123
888	ENSG00000065325	GLP2R	1.60287	0.406733	1.28755	0.315897	0.75208	NA
889	ENSG00000065328	MCM10	724.618	-1.59331	0.48222	-3.30411	0.000952771	0.0995267
890	ENSG00000065357	DGKA	6031.3	-0.0283833	0.322315	-0.0880608	0.929828	0.981879
891	ENSG00000065361	ERBB3	57.6422	-0.316171	0.366614	-0.862407	0.388464	0.776018
892	ENSG00000065413	ANKRD44	5456.89	-0.310662	0.253948	-1.22333	0.221205	0.657998
893	ENSG00000065427	KARS1	5995.56	-0.0898544	0.12577	-0.714432	0.47496	0.817046
894	ENSG00000065457	ADAT1	1074.55	0.0743072	0.249352	0.298001	0.765702	0.933527
895	ENSG00000065485	PDIA5	281.586	-0.41299	0.288059	-1.4337	0.151659	0.585679
896	ENSG00000065491	TBC1D22B	1220.42	-0.150609	0.0915841	-1.64449	0.100074	0.513128
897	ENSG00000065518	NDUFB4	2404.56	0.0275657	0.109976	0.250651	0.802084	0.944612
898	ENSG00000065526	SPEN	9112.71	0.0484357	0.100562	0.48165	0.630055	0.885219
899	ENSG00000065534	MYLK	373.875	0.236683	0.486993	0.486009	0.626961	0.884034
900	ENSG00000065548	ZC3H15	3237.76	0.10198	0.0989009	1.03114	0.302477	0.720919
901	ENSG00000065559	MAP2K4	1680.48	0.188225	0.182097	1.03365	0.301298	0.71994
902	ENSG00000065600	PACC1	1122.84	0.049768	0.264455	0.18819	0.850727	0.959877
903	ENSG00000065609	SNAP91	1.28005	1.30184	1.33256	0.976947	0.328595	NA
904	ENSG00000065613	SLK	4660.37	0.0162633	0.183209	0.0887691	0.929265	0.981879
905	ENSG00000065615	CYB5R4	2713	0.190256	0.314214	0.605497	0.544849	0.848648
906	ENSG00000065618	COL17A1	3.6327	0.216735	0.614005	0.352986	0.724099	0.919244
907	ENSG00000065621	GSTO2	55.1268	1.01989	0.46718	2.18307	0.0290304	0.344213
908	ENSG00000065665	SEC61A2	311.155	-0.423105	0.31682	-1.33547	0.181721	0.61869
909	ENSG00000065675	PRKCQ	1999.81	-1.00075	0.431495	-2.31925	0.0203813	0.30252
910	ENSG00000065717	TLE2	199.944	0.448636	0.39234	1.14349	0.252837	0.685674
911	ENSG00000065802	ASB1	2034.13	-0.0182822	0.114097	-0.160233	0.872697	0.966876
912	ENSG00000065809	FAM107B	8554.65	0.233986	0.159633	1.46577	0.142711	0.575968
913	ENSG00000065833	ME1	1469.38	0.348234	0.439607	0.792149	0.428274	0.795945
914	ENSG00000065882	TBC1D1	7454.79	0.299682	0.283625	1.05662	0.290687	0.712427
915	ENSG00000065883	CDK13	3753.42	-0.0536548	0.106363	-0.50445	0.613945	0.87954
916	ENSG00000065911	MTHFD2	9806.5	-0.113167	0.228348	-0.49559	0.620184	0.881908
917	ENSG00000065923	SLC9A7	5368.94	0.659857	0.404897	1.62969	0.103167	0.517661
918	ENSG00000065970	FOXJ2	1864.38	-0.0742614	0.115857	-0.640972	0.521541	0.837511
919	ENSG00000065978	YBX1	43231.3	0.0441941	0.234137	0.188753	0.850287	0.959877
920	ENSG00000065989	PDE4A	3001.16	-0.328938	0.152541	-2.15639	0.0310532	0.35226
921	ENSG00000066027	PPP2R5A	2401.59	0.166188	0.18147	0.91579	0.359777	0.759055
922	ENSG00000066032	CTNNA2	1.47183	-3.89832	2.89548	-1.34635	0.17819	NA
923	ENSG00000066044	ELAVL1	3478.51	-0.0931265	0.0936864	-0.994023	0.320212	0.73449
924	ENSG00000066056	TIE1	4981.76	1.32109	0.444315	2.97331	0.00294603	0.156871
925	ENSG00000066084	DIP2B	3319.41	0.211897	0.209527	1.01131	0.311867	0.729235
926	ENSG00000066117	SMARCD1	2085.41	-0.287631	0.140553	-2.04643	0.0407144	0.384301
927	ENSG00000066135	KDM4A	2294.64	-0.248684	0.0935709	-2.65771	0.00786735	0.230022
928	ENSG00000066136	NFYC	2366.24	0.266389	0.211845	1.25747	0.208582	0.645702
929	ENSG00000066185	ZMYND12	31.7257	-0.00190241	0.412263	-0.00461455	0.996318	0.999534
930	ENSG00000066230	SLC9A3	98.7812	0.321835	0.209037	1.53961	0.123656	0.550164
931	ENSG00000066248	NGEF	2.00887	-0.271278	0.781036	-0.347331	0.728343	NA
932	ENSG00000066279	ASPM	2615.68	-1.1858	0.486623	-2.4368	0.0148178	0.274039
933	ENSG00000066294	CD84	30943.7	0.354646	0.456251	0.777305	0.436979	0.798943
934	ENSG00000066322	ELOVL1	4476.22	0.62097	0.233782	2.65619	0.00790291	0.230022
935	ENSG00000066336	SPI1	10036.9	0.489599	0.417969	1.17138	0.241447	0.674429
936	ENSG00000066379	ZNRD1	572.113	-0.302943	0.301566	-1.00457	0.315106	0.731469
937	ENSG00000066382	MPPED2	33.9836	-1.40231	0.575731	-2.43571	0.0148628	0.274039
938	ENSG00000066422	ZBTB11	2064.77	0.0196217	0.157642	0.12447	0.900943	0.975366
939	ENSG00000066427	ATXN3	1448.23	-0.0689052	0.131332	-0.524662	0.599818	0.872804
940	ENSG00000066455	GOLGA5	2317.85	0.143252	0.125172	1.14445	0.252437	0.685147
941	ENSG00000066468	FGFR2	37.3469	-1.29271	0.486351	-2.65798	0.00786109	0.230022
942	ENSG00000066557	LRRC40	727.361	-0.0963615	0.115741	-0.832561	0.405092	0.784218
943	ENSG00000066583	ISOC1	1003.89	0.125966	0.133858	0.941042	0.346683	0.750468
944	ENSG00000066629	EML1	11.8875	-0.598861	0.407819	-1.46845	0.141983	0.574513
945	ENSG00000066651	TRMT11	338.527	0.0765321	0.117601	0.650779	0.515189	0.834072
946	ENSG00000066654	THUMPD1	2534.88	0.0589979	0.150571	0.391827	0.695186	0.908308
947	ENSG00000066697	MSANTD3	2138.09	0.603403	0.281675	2.14219	0.0321779	0.3539
948	ENSG00000066735	KIF26A	3.99598	-0.907839	0.505854	-1.79467	0.0727069	0.460399
949	ENSG00000066739	ATG2B	2417.88	-0.283339	0.259493	-1.0919	0.274878	0.7022
950	ENSG00000066777	ARFGEF1	5384.32	0.0348284	0.164005	0.212361	0.831825	0.953374
951	ENSG00000066813	ACSM2B	4.15806	-0.464508	1.0099	-0.459953	0.64555	0.890378
952	ENSG00000066827	ZFAT	445.332	0.0502188	0.156579	0.320726	0.748418	0.92879
953	ENSG00000066855	MTFR1	465.077	-0.141448	0.179118	-0.78969	0.429709	0.796433
954	ENSG00000066923	STAG3	625.153	0.119627	0.216834	0.551696	0.581156	0.864658
955	ENSG00000066926	FECH	1496.45	-0.140613	0.311484	-0.451429	0.65168	0.892331
956	ENSG00000066933	MYO9A	1930.78	0.0188671	0.252276	0.0747875	0.940384	0.984706
957	ENSG00000067048	DDX3Y	1851.12	-1.46134	0.836639	-1.74668	0.0806931	0.474917
958	ENSG00000067057	PFKP	6428.49	0.0906864	0.155183	0.584384	0.558962	0.854774
959	ENSG00000067064	IDI1	3487.32	0.0913414	0.108792	0.839599	0.401133	0.781896
960	ENSG00000067066	SP100	6478.08	-0.196244	0.128495	-1.52725	0.126698	0.554973
961	ENSG00000067082	KLF6	10773.7	0.142619	0.130277	1.09474	0.273632	0.701444
962	ENSG00000067113	PLPP1	346.878	-1.75501	0.426026	-4.1195	3.79697e-05	0.0173652
963	ENSG00000067141	NEO1	352.263	-0.642371	0.359831	-1.7852	0.0742284	0.462711
964	ENSG00000067167	TRAM1	11637.5	0.20448	0.171636	1.19136	0.233513	0.668046
965	ENSG00000067177	PHKA1	89.6838	-0.311947	0.485084	-0.643078	0.520173	0.83666
966	ENSG00000067182	TNFRSF1A	3215.99	-0.0171299	0.219962	-0.0778766	0.937926	0.984042
967	ENSG00000067191	CACNB1	444.674	-0.232163	0.357531	-0.649351	0.516111	0.834104
968	ENSG00000067208	EVI5	1198.79	0.465095	0.477195	0.974642	0.329738	0.739342
969	ENSG00000067221	STOML1	211.336	-0.174548	0.202296	-0.862838	0.388226	0.776018
970	ENSG00000067225	PKM	109823	0.336321	0.295551	1.13795	0.255143	0.687004
971	ENSG00000067248	DHX29	1711.11	0.138518	0.181467	0.763324	0.44527	0.803343
972	ENSG00000067334	DNTTIP2	3741.88	-0.0910831	0.183308	-0.496885	0.61927	0.881762
973	ENSG00000067365	METTL22	700.573	-0.228942	0.208613	-1.09745	0.272443	0.700318
974	ENSG00000067369	TP53BP1	2059.48	-0.229708	0.18471	-1.24361	0.213642	0.650858
975	ENSG00000067445	TRO	95.8412	-0.384425	0.580415	-0.662327	0.507761	0.831202
976	ENSG00000067533	RRP15	679.741	0.454562	0.319032	1.42482	0.15421	0.589283
977	ENSG00000067560	RHOA	25635.1	0.169663	0.184687	0.918654	0.358276	0.758401
978	ENSG00000067596	DHX8	2815.59	-0.075671	0.0809261	-0.935063	0.349756	0.752394
979	ENSG00000067601	PMS2P4	62.3895	-0.616406	0.189374	-3.25496	0.00113409	0.109743
980	ENSG00000067606	PRKCZ	414.065	-0.339157	0.339845	-0.997976	0.318291	0.734152
981	ENSG00000067646	ZFY	227.434	-0.980122	0.85852	-1.14164	0.253603	0.685758
982	ENSG00000067704	IARS2	4463.1	0.19316	0.309784	0.623532	0.532935	0.843916
983	ENSG00000067715	SYT1	14.9216	-0.594482	0.749737	-0.792921	0.427824	0.795609
984	ENSG00000067798	NAV3	53.8636	0.58245	0.2939	1.9818	0.0475016	0.39812
985	ENSG00000067829	IDH3G	2864.51	0.0512301	0.153678	0.33336	0.738862	0.925338
986	ENSG00000067836	ROGDI	662.549	-0.0336297	0.322821	-0.104175	0.917031	0.979853
987	ENSG00000067840	PDZD4	249.192	-0.301656	0.308693	-0.977203	0.328469	0.738627
988	ENSG00000067842	ATP2B3	22.0702	1.56774	0.639251	2.45247	0.0141879	0.270393
989	ENSG00000067900	ROCK1	11199.2	0.166523	0.248358	0.670497	0.502541	0.828633
990	ENSG00000067955	CBFB	3085.38	-0.137985	0.123423	-1.11798	0.263575	0.692674
991	ENSG00000067992	PDK3	1781.14	-0.250506	0.132547	-1.88994	0.0587666	0.430379
992	ENSG00000068001	HYAL2	712.384	0.349055	0.410525	0.850264	0.395178	0.779497
993	ENSG00000068024	HDAC4	1471.23	-0.32952	0.172262	-1.9129	0.0557603	0.420448
994	ENSG00000068028	RASSF1	2478.63	-0.355001	0.244635	-1.45115	0.146739	0.581499
995	ENSG00000068078	FGFR3	20.9876	1.39386	0.638683	2.18239	0.0290806	0.344213
996	ENSG00000068079	IFI35	1348.77	-0.235058	0.206393	-1.13889	0.25475	0.686315
997	ENSG00000068097	HEATR6	1253.27	0.0231612	0.129501	0.17885	0.858056	0.962537
998	ENSG00000068120	COASY	2467.03	0.00219953	0.157306	0.0139825	0.988844	0.99757
999	ENSG00000068137	PLEKHH3	124.405	-0.976021	0.543615	-1.79543	0.0725856	0.460399
1000	ENSG00000068305	MEF2A	5928.27	0.556111	0.328747	1.69161	0.0907205	0.495862
1001	ENSG00000068308	OTUD5	3513.53	-0.132056	0.150243	-0.878949	0.379429	0.770973
1002	ENSG00000068323	TFE3	4208.44	-0.087099	0.124294	-0.700748	0.48346	0.821023
1003	ENSG00000068354	TBC1D25	1191.14	-0.115498	0.140242	-0.823565	0.410187	0.787249
1004	ENSG00000068366	ACSL4	14723	0.623595	0.347854	1.79269	0.073022	0.460449
1005	ENSG00000068383	INPP5A	357.032	-0.00713903	0.227859	-0.031331	0.975006	0.994401
1006	ENSG00000068394	GPKOW	1047.93	-0.0928438	0.086779	-1.06989	0.28467	0.708793
1007	ENSG00000068400	GRIPAP1	5793.79	-0.064209	0.125144	-0.51308	0.607895	0.876387
1008	ENSG00000068438	FTSJ1	1574.04	-0.199781	0.16826	-1.18734	0.235095	0.669247
1009	ENSG00000068489	PRR11	1969.87	-1.04591	0.303252	-3.44897	0.000562731	0.0795919
1010	ENSG00000068615	REEP1	42.4847	1.73548	0.619033	2.80353	0.00505468	0.199549
1011	ENSG00000068650	ATP11A	5742.69	0.334939	0.345905	0.968296	0.332897	0.741136
1012	ENSG00000068654	POLR1A	3223.33	0.289007	0.288171	1.0029	0.315909	0.732064
1013	ENSG00000068697	LAPTM4A	3623.57	0.186499	0.244669	0.76225	0.445911	0.803587
1014	ENSG00000068724	TTC7A	4301.82	-0.00828882	0.126719	-0.0654109	0.947847	0.986782
1015	ENSG00000068745	IP6K2	1737.9	-0.268143	0.161461	-1.66073	0.0967672	0.50754
1016	ENSG00000068781	STON1-GTF2A1L	2.26976	-2.52082	1.25276	-2.01222	0.044197	NA
1017	ENSG00000068784	SRBD1	1137.78	-0.0380867	0.166049	-0.229371	0.818581	0.949881
1018	ENSG00000068796	KIF2A	5342.98	-0.22677	0.142577	-1.59051	0.111721	0.530463
1019	ENSG00000068831	RASGRP2	2223.78	0.200141	0.312893	0.639648	0.522401	0.838031
1020	ENSG00000068878	PSME4	5018.45	-0.220134	0.132816	-1.65743	0.0974317	0.508674
1021	ENSG00000068885	IFT80	562.258	-0.365279	0.259384	-1.40826	0.159055	0.595341
1022	ENSG00000068903	SIRT2	2476.73	-0.13796	0.0977955	-1.4107	0.158334	0.594475
1023	ENSG00000068912	ERLEC1	2143.42	-0.111415	0.11761	-0.947321	0.343475	0.748208
1024	ENSG00000068971	PPP2R5B	507.43	-0.309499	0.248601	-1.24496	0.213146	0.650419
1025	ENSG00000068976	PYGM	397.558	-0.0482103	0.576473	-0.0836297	0.933351	0.982858
1026	ENSG00000069011	PITX1	33.8123	0.511656	0.502462	1.0183	0.308537	0.726143
1027	ENSG00000069020	MAST4	760.933	-0.405895	0.305095	-1.33039	0.183389	0.620141
1028	ENSG00000069122	ADGRF5	0.616215	1.05444	1.27368	0.827873	0.407742	NA
1029	ENSG00000069188	SDK2	116.058	1.59518	0.445841	3.5779	0.00034636	0.0635825
1030	ENSG00000069248	NUP133	1825.48	-0.104812	0.157086	-0.667225	0.504628	0.830016
1031	ENSG00000069275	NUCKS1	11845.8	-0.554357	0.180321	-3.07428	0.00211009	0.14316
1032	ENSG00000069329	VPS35	5469.94	0.00422765	0.313488	0.0134858	0.98924	0.99757
1033	ENSG00000069345	DNAJA2	3893.01	0.0964279	0.081689	1.18043	0.237831	0.671548
1034	ENSG00000069399	BCL3	811.213	-0.257552	0.279375	-0.921887	0.356587	0.757435
1035	ENSG00000069424	KCNAB2	20157.1	0.05876	0.2601	0.225913	0.821269	0.950827
1036	ENSG00000069431	ABCC9	180.219	-0.486466	0.325065	-1.49652	0.134519	0.565999
1037	ENSG00000069482	GAL	1347.97	-0.00741048	0.639169	-0.0115939	0.99075	0.99812
1038	ENSG00000069493	CLEC2D	6816.83	-0.340904	0.394202	-0.864795	0.387151	0.77567
1039	ENSG00000069509	FUNDC1	370.664	-0.0925826	0.127596	-0.725593	0.468088	0.813929
1040	ENSG00000069535	MAOB	4.23842	-0.537438	0.581847	-0.923675	0.355656	0.756329
1041	ENSG00000069667	RORA	5815.86	-0.781809	0.401966	-1.94496	0.0517794	0.411174
1042	ENSG00000069696	DRD4	43.7599	-0.531147	0.702619	-0.755952	0.449678	0.804794
1043	ENSG00000069702	TGFBR3	2236.95	-1.06544	0.445389	-2.39215	0.0167499	0.282936
1044	ENSG00000069764	PLA2G10	3.48151	0.391883	0.691894	0.566392	0.571128	0.859947
1045	ENSG00000069812	HES2	191.703	-0.0551674	0.435147	-0.126779	0.899115	0.974614
1046	ENSG00000069849	ATP1B3	5228.36	0.117185	0.171931	0.681583	0.495503	0.826937
1047	ENSG00000069869	NEDD4	1150.03	-0.100677	0.237265	-0.424325	0.671329	0.899976
1048	ENSG00000069943	PIGB	452.846	-0.387514	0.191566	-2.02288	0.0430859	0.386797
1049	ENSG00000069956	MAPK6	4978.7	0.315798	0.203065	1.55516	0.119908	0.54514
1050	ENSG00000069966	GNB5	765.92	-0.0525098	0.173177	-0.303214	0.761727	0.932402
1051	ENSG00000069974	RAB27A	4420.27	-0.759423	0.259098	-2.93103	0.00337842	0.169815
1052	ENSG00000069998	HDHD5	1234.25	0.277355	0.268648	1.03241	0.301881	0.720435
1053	ENSG00000070010	UFD1	2613.93	-0.0641367	0.118231	-0.54247	0.587494	0.867956
1054	ENSG00000070018	LRP6	60.1171	0.298395	0.368286	0.810225	0.417811	0.790131
1055	ENSG00000070019	GUCY2C	2.466	0.459072	1.69188	0.271338	0.786131	0.939038
1056	ENSG00000070031	SCT	6.33744	0.231966	1.33523	0.173727	0.86208	0.963891
1057	ENSG00000070047	PHRF1	3749.04	-0.0184696	0.0994587	-0.185701	0.852679	0.960649
1058	ENSG00000070061	ELP1	1828.27	0.125838	0.129998	0.967998	0.333045	0.741268
1059	ENSG00000070081	NUCB2	2459.08	-0.743678	0.176032	-4.22467	2.39294e-05	0.0146701
1060	ENSG00000070087	PFN2	69.779	0.548013	0.333698	1.64224	0.100539	0.513532
1061	ENSG00000070159	PTPN3	35.7335	-0.169221	0.56235	-0.300919	0.763477	0.933165
1062	ENSG00000070182	SPTB	100.171	-0.22917	0.246462	-0.92984	0.352454	0.753832
1063	ENSG00000070190	DAPP1	933.473	0.209023	0.193825	1.07841	0.28085	0.705687
1064	ENSG00000070214	SLC44A1	4501.99	0.437733	0.354883	1.23346	0.217405	0.654575
1065	ENSG00000070269	TMEM260	1039.03	0.0111908	0.127053	0.0880798	0.929813	0.981879
1066	ENSG00000070366	SMG6	2842.94	-0.580167	0.234343	-2.47572	0.0132969	0.265577
1067	ENSG00000070367	EXOC5	4653.38	0.132271	0.303334	0.436058	0.662795	0.896791
1068	ENSG00000070371	CLTCL1	62.6965	-0.217922	0.327392	-0.665631	0.505647	0.830416
1069	ENSG00000070388	FGF22	31.4132	-0.282438	0.435662	-0.648298	0.516792	0.834268
1070	ENSG00000070404	FSTL3	173.908	0.355958	0.334663	1.06363	0.287496	0.710825
1071	ENSG00000070413	DGCR2	2589.6	0.207461	0.185053	1.12109	0.262251	0.69164
1072	ENSG00000070423	RNF126	1071.34	-0.259332	0.191935	-1.35114	0.17665	0.61353
1073	ENSG00000070444	MNT	1548.48	0.0466043	0.123661	0.376871	0.706269	0.912235
1074	ENSG00000070476	ZXDC	1233.25	0.0127715	0.120284	0.106178	0.915441	0.979846
1075	ENSG00000070495	JMJD6	3519.67	-0.408318	0.411535	-0.992183	0.321108	0.734496
1076	ENSG00000070501	POLB	651.82	-0.419909	0.242185	-1.73383	0.0829478	0.478933
1077	ENSG00000070526	ST6GALNAC1	27.5195	0.640791	0.601829	1.06474	0.286994	0.710232
1078	ENSG00000070540	WIPI1	1757.62	-0.366171	0.243166	-1.50585	0.132107	0.563021
1079	ENSG00000070601	FRMPD1	57.8613	-0.420621	0.406866	-1.03381	0.301226	0.7199
1080	ENSG00000070610	GBA2	2372.44	0.028436	0.111379	0.255309	0.798484	0.943533
1081	ENSG00000070614	NDST1	4338.49	0.457107	0.459893	0.993942	0.320251	0.73449
1082	ENSG00000070669	ASNS	1571.98	-0.327326	0.396447	-0.825648	0.409004	0.786557
1083	ENSG00000070718	AP3M2	736.846	-0.0412632	0.192999	-0.2138	0.830703	0.953102
1084	ENSG00000070729	CNGB1	2.63323	0.957453	1.04806	0.913552	0.360953	0.760027
1085	ENSG00000070731	ST6GALNAC2	375.593	-0.142535	0.316537	-0.450294	0.652498	0.892716
1086	ENSG00000070748	CHAT	0.483573	1.31243	2.27064	0.578003	0.563262	NA
1087	ENSG00000070756	PABPC1	67080.6	-0.0439941	0.106386	-0.413535	0.679215	0.901876
1088	ENSG00000070759	TESK2	425.6	-0.0183622	0.208562	-0.0880418	0.929843	0.981879
1089	ENSG00000070761	CFAP20	1141.25	-0.0403334	0.172214	-0.234205	0.814826	0.948509
1090	ENSG00000070770	CSNK2A2	3787.95	-0.0955068	0.14346	-0.665737	0.505579	0.830359
1091	ENSG00000070778	PTPN21	20.4898	-0.0257363	0.463584	-0.055516	0.955727	0.988686
1092	ENSG00000070785	EIF2B3	672.373	0.153484	0.220789	0.695163	0.486953	0.823095
1093	ENSG00000070808	CAMK2A	4.88712	0.266955	0.408216	0.653954	0.513141	0.833291
1094	ENSG00000070814	TCOF1	2956.36	-0.209229	0.182028	-1.14944	0.250376	0.683066
1095	ENSG00000070831	CDC42	13924.6	0.091743	0.216256	0.424234	0.671395	0.899976
1096	ENSG00000070882	OSBPL3	2893.4	-0.419739	0.174614	-2.40381	0.0162253	0.279946
1097	ENSG00000070886	EPHA8	0.950528	-0.927503	1.20567	-0.769288	0.441723	NA
1098	ENSG00000070915	SLC12A3	8.583	1.21581	0.505706	2.40419	0.0162085	0.279927
1099	ENSG00000070950	RAD18	661.043	-0.167431	0.201733	-0.829962	0.40656	0.785375
1100	ENSG00000070961	ATP2B1	3262.22	0.1783	0.242566	0.735059	0.462304	0.811708
1101	ENSG00000070985	TRPM5	0.810297	1.39927	1.38409	1.01097	0.312032	NA
1102	ENSG00000071051	NCK2	1693.66	-0.0180181	0.131479	-0.137042	0.890998	0.971153
1103	ENSG00000071054	MAP4K4	7234.37	0.293105	0.135455	2.16386	0.0304754	0.348795
1104	ENSG00000071073	MGAT4A	3489.17	-0.37983	0.199641	-1.90256	0.0570975	0.425521
1105	ENSG00000071082	RPL31	8415.88	-0.357555	0.316454	-1.12988	0.258527	0.689514
1106	ENSG00000071127	WDR1	31638.8	0.266124	0.296394	0.897875	0.369252	0.764336
1107	ENSG00000071189	SNX13	1906.02	-0.0102911	0.27856	-0.0369438	0.97053	0.99338
1108	ENSG00000071205	ARHGAP10	2401.64	0.391222	0.35654	1.09727	0.272522	0.700338
1109	ENSG00000071242	RPS6KA2	3781.51	0.333204	0.43789	0.760931	0.446698	0.803753
1110	ENSG00000071243	ING3	789.515	0.0309335	0.132939	0.232689	0.816003	0.948668
1111	ENSG00000071246	VASH1	4172.47	0.397921	0.450792	0.882717	0.377389	0.770293
1112	ENSG00000071282	LMCD1	42.1211	-0.525289	0.651535	-0.806233	0.420108	0.791778
1113	ENSG00000071462	BUD23	1886.07	0.0596734	0.107289	0.556196	0.578077	0.863571
1114	ENSG00000071537	SEL1L	13944.8	0.322554	0.348009	0.926856	0.354001	0.754803
1115	ENSG00000071539	TRIP13	285.628	-0.753145	0.368173	-2.04563	0.0407928	0.384304
1116	ENSG00000071553	ATP6AP1	19768.6	0.457109	0.340754	1.34147	0.179769	0.617244
1117	ENSG00000071564	TCF3	2223.59	-0.0340433	0.141155	-0.241178	0.809417	0.946781
1118	ENSG00000071575	TRIB2	885.536	-0.163844	0.275556	-0.594593	0.552116	0.851196
1119	ENSG00000071626	DAZAP1	5592.72	-0.113457	0.0878634	-1.29129	0.196602	0.634528
1120	ENSG00000071655	MBD3	1974.85	0.0420185	0.126688	0.331669	0.740139	0.925751
1121	ENSG00000071794	HLTF	1066.96	-0.257817	0.193201	-1.33445	0.182056	0.619322
1122	ENSG00000071859	FAM50A	4990.63	-0.24401	0.277891	-0.878077	0.379902	0.771145
1123	ENSG00000071889	FAM3A	1143.03	-0.00802249	0.136853	-0.0586213	0.953254	0.988576
1124	ENSG00000071894	CPSF1	5874.6	-0.355002	0.284712	-1.24688	0.212441	0.649953
1125	ENSG00000071909	MYO3B	32.2796	-0.948997	0.507154	-1.87122	0.0613147	0.435253
1126	ENSG00000071967	CYBRD1	825.608	-0.477158	0.408055	-1.16935	0.242264	0.67519
1127	ENSG00000071994	PDCD2	1862.36	-0.0113194	0.112393	-0.100712	0.919779	0.980488
1128	ENSG00000072041	SLC6A15	0.316701	1.67597	2.67166	0.627315	0.530453	NA
1129	ENSG00000072042	RDH11	3652.75	-0.03068	0.147584	-0.207882	0.835321	0.954335
1130	ENSG00000072062	PRKACA	3893.39	0.0641056	0.23885	0.268392	0.788398	0.940157
1131	ENSG00000072071	ADGRL1	587.229	0.165424	0.26305	0.628868	0.529436	0.84232
1132	ENSG00000072080	SPP2	9.36802	-0.0420314	0.403843	-0.104079	0.917107	0.979853
1133	ENSG00000072110	ACTN1	17221.3	0.702874	0.371959	1.88965	0.0588044	0.430379
1134	ENSG00000072121	ZFYVE26	5687.15	-0.159512	0.399146	-0.399633	0.689427	0.905811
1135	ENSG00000072133	RPS6KA6	22.1345	0.53406	0.481344	1.10952	0.267207	0.695808
1136	ENSG00000072134	EPN2	387.544	0.37928	0.399019	0.950532	0.341842	0.747135
1137	ENSG00000072135	PTPN18	4927.18	-0.0904903	0.179696	-0.503574	0.614561	0.879887
1138	ENSG00000072163	LIMS2	58.8104	0.862441	0.402477	2.14283	0.0321264	0.353765
1139	ENSG00000072182	ASIC4	11.285	-0.0518829	0.812747	-0.0638365	0.9491	0.987551
1140	ENSG00000072195	SPEG	106.972	0.0219497	0.432337	0.0507699	0.959509	0.989816
1141	ENSG00000072201	LNX1	12.4884	1.56406	0.656893	2.381	0.0172659	0.284972
1142	ENSG00000072210	ALDH3A2	3440.08	-0.311986	0.329917	-0.945649	0.344328	0.748673
1143	ENSG00000072274	TFRC	58425.2	0.579457	0.432343	1.34027	0.180157	0.617416
1144	ENSG00000072310	SREBF1	1874.91	0.262811	0.301068	0.87293	0.382701	0.772872
1145	ENSG00000072364	AFF4	7807	0.256228	0.217112	1.18016	0.237935	0.671548
1146	ENSG00000072401	UBE2D1	1129.05	0.0952649	0.273499	0.348318	0.727601	0.92059
1147	ENSG00000072415	MPP5	590.605	-0.0776732	0.167815	-0.46285	0.643472	0.889545
1148	ENSG00000072422	RHOBTB1	258.297	-0.546075	0.569543	-0.958794	0.337663	0.745884
1149	ENSG00000072501	SMC1A	9530.51	-0.0288323	0.298784	-0.096499	0.923124	0.980616
1150	ENSG00000072506	HSD17B10	1111	-0.0219815	0.186234	-0.118032	0.906042	0.977299
1151	ENSG00000072518	MARK2	3060.25	-0.0222482	0.121795	-0.182669	0.855058	0.961334
1152	ENSG00000072571	HMMR	1128.73	-0.951709	0.418366	-2.27482	0.0229166	0.317081
1153	ENSG00000072609	CHFR	3253.69	-0.115428	0.185531	-0.62215	0.533843	0.844229
1154	ENSG00000072657	TRHDE	3.69818	2.26387	0.942934	2.40088	0.0163559	0.280751
1155	ENSG00000072682	P4HA2	1103.8	0.118147	0.35853	0.329533	0.741753	0.926255
1156	ENSG00000072694	FCGR2B	1247.47	0.0429401	0.477552	0.0899171	0.928353	0.98177
1157	ENSG00000072736	NFATC3	7158.32	-0.246605	0.177194	-1.39172	0.164007	0.600027
1158	ENSG00000072756	TRNT1	709.41	-0.0897884	0.139859	-0.641994	0.520877	0.837077
1159	ENSG00000072778	ACADVL	25480	0.0556781	0.14901	0.373653	0.708662	0.913348
1160	ENSG00000072786	STK10	13145.5	-0.124874	0.149384	-0.835927	0.403196	0.783109
1161	ENSG00000072803	FBXW11	3177.4	0.286716	0.216616	1.32361	0.185633	0.621723
1162	ENSG00000072818	ACAP1	7777.02	-0.570976	0.349766	-1.63245	0.102585	0.516983
1163	ENSG00000072832	CRMP1	2.01284	0.36133	0.905135	0.3992	0.689746	NA
1164	ENSG00000072840	EVC	865.969	0.405505	0.376149	1.07804	0.281015	0.705687
1165	ENSG00000072849	DERL2	1427.04	-0.164796	0.127733	-1.29016	0.196993	0.634913
1166	ENSG00000072858	SIDT1	689.316	-0.336352	0.264803	-1.2702	0.204015	0.64149
1167	ENSG00000072864	NDE1	1953.78	-0.0724119	0.168559	-0.429593	0.667491	0.898797
1168	ENSG00000072952	MRVI1	6.04984	0.0695018	0.600339	0.115771	0.907834	0.978035
1169	ENSG00000072954	TMEM38A	50.1741	-0.271749	0.324409	-0.837675	0.402214	0.782549
1170	ENSG00000072958	AP1M1	2765.09	-0.153287	0.161618	-0.948455	0.342898	0.747726
1171	ENSG00000073008	PVR	1123.25	0.462187	0.319792	1.44527	0.148381	0.582831
1172	ENSG00000073050	XRCC1	1704.49	-0.100462	0.100023	-1.00439	0.315191	0.731528
1173	ENSG00000073060	SCARB1	2343.47	0.102433	0.484437	0.211447	0.832539	0.95348
1174	ENSG00000073067	CYP2W1	4.49575	0.810372	0.557841	1.45269	0.146309	0.581202
1175	ENSG00000073111	MCM2	2307	-0.405392	0.309831	-1.30843	0.190726	0.628393
1176	ENSG00000073146	MOV10L1	11.8536	0.37403	0.370136	1.01052	0.312246	0.729316
1177	ENSG00000073150	PANX2	273.577	-0.871151	0.52875	-1.64757	0.0994415	0.512477
1178	ENSG00000073169	SELENOO	1425.25	-0.406914	0.245716	-1.65603	0.0977148	0.509275
1179	ENSG00000073282	TP63	24.4148	-0.718423	0.580092	-1.23846	0.215544	0.652672
1180	ENSG00000073331	ALPK1	1938.31	0.0925099	0.210226	0.44005	0.659901	0.895433
1181	ENSG00000073350	LLGL2	903.148	-0.223352	0.280255	-0.796961	0.425474	0.794239
1182	ENSG00000073417	PDE8A	2336.23	0.291862	0.208908	1.39709	0.162387	0.598262
1183	ENSG00000073464	CLCN4	224.18	-0.499956	0.595502	-0.839554	0.401159	0.781896
1184	ENSG00000073536	NLE1	365.494	0.0668018	0.234516	0.284849	0.77576	0.93663
1185	ENSG00000073578	SDHA	7985.03	-0.174392	0.115645	-1.50799	0.131556	0.562154
1186	ENSG00000073584	SMARCE1	4188.73	-0.229946	0.106917	-2.15069	0.0315009	0.352999
1187	ENSG00000073598	FNDC8	1.11384	-2.21054	1.08235	-2.04236	0.0411162	NA
1188	ENSG00000073605	GSDMB	3694.02	-0.486483	0.553912	-0.878267	0.379799	0.771145
1189	ENSG00000073614	KDM5A	6016.9	-0.254466	0.16842	-1.5109	0.130813	0.56105
1190	ENSG00000073670	ADAM11	22.1347	0.0247631	0.552743	0.0448004	0.964266	0.990904
1191	ENSG00000073711	PPP2R3A	744.021	0.454122	0.483292	0.939643	0.347401	0.750603
1192	ENSG00000073712	FERMT2	203.854	0.244463	0.379003	0.645016	0.518917	0.835716
1193	ENSG00000073734	ABCB11	184.442	0.0561405	0.384208	0.14612	0.883827	0.969957
1194	ENSG00000073737	DHRS9	3344.38	0.797602	0.465864	1.71209	0.0868798	0.487401
1195	ENSG00000073754	CD5L	2.25322	-0.534097	0.586908	-0.910018	0.362813	NA
1196	ENSG00000073756	PTGS2	460.79	0.971098	0.55873	1.73805	0.0822028	0.477384
1197	ENSG00000073792	IGF2BP2	749.236	0.654939	0.35399	1.85016	0.0642905	0.44149
1198	ENSG00000073803	MAP3K13	582.116	0.0630462	0.143803	0.438419	0.661082	0.896036
1199	ENSG00000073849	ST6GAL1	5941.65	0.556851	0.340651	1.63467	0.102119	0.516198
1200	ENSG00000073861	TBX21	3359.82	-0.290258	0.323574	-0.897039	0.369698	0.764542
1201	ENSG00000073905	VDAC1P1	3.22845	-0.00139248	0.586052	-0.00237603	0.998104	0.999892
1202	ENSG00000073910	FRY	556.453	0.378119	0.350654	1.07833	0.280887	0.705687
1203	ENSG00000073921	PICALM	16547.8	0.274212	0.320028	0.856837	0.391535	0.777663
1204	ENSG00000073969	NSF	4676.35	0.0252398	0.350251	0.0720621	0.942552	0.985284
1205	ENSG00000074047	GLI2	3.2105	-3.51002	1.32727	-2.64453	0.00818042	0.230022
1206	ENSG00000074054	CLASP1	3821.82	-0.175312	0.16354	-1.07198	0.283728	0.708116
1207	ENSG00000074071	MRPS34	1705.19	-0.0490116	0.179018	-0.273781	0.784253	0.93852
1208	ENSG00000074181	NOTCH3	1311.95	0.520176	0.381919	1.36201	0.173196	0.610504
1209	ENSG00000074201	CLNS1A	2409.57	-0.0771121	0.138646	-0.556181	0.578087	0.863571
1210	ENSG00000074211	PPP2R2C	6.44388	-0.107537	0.309153	-0.347844	0.727958	0.92059
1211	ENSG00000074219	TEAD2	37.3389	3.76394	0.617815	6.09234	1.11269e-09	5.55589e-06
1212	ENSG00000074266	EED	999.101	-0.22367	0.193457	-1.15617	0.247611	0.680448
1213	ENSG00000074276	CDHR2	25.9511	0.0748105	0.63684	0.117471	0.906487	0.977469
1214	ENSG00000074317	SNCB	2.59979	0.346085	0.740805	0.467174	0.640375	0.888792
1215	ENSG00000074319	TSG101	1915.72	0.0208814	0.122343	0.170679	0.864476	0.964713
1216	ENSG00000074356	NCBP3	4188.73	-0.641826	0.280445	-2.2886	0.0221028	0.312644
1217	ENSG00000074370	ATP2A3	10021	0.0290364	0.186327	0.155836	0.876162	0.967674
1218	ENSG00000074410	CA12	187.559	-0.60544	0.637339	-0.94995	0.342138	0.74725
1219	ENSG00000074416	MGLL	14504.1	0.261394	0.476977	0.548022	0.583677	0.865891
1220	ENSG00000074527	NTN4	46.4551	-0.83768	0.517685	-1.61812	0.105636	0.5219
1221	ENSG00000074582	BCS1L	558.365	-0.147906	0.168468	-0.877946	0.379973	0.771145
1222	ENSG00000074590	NUAK1	176.153	-1.32584	0.629229	-2.10709	0.0351099	0.366113
1223	ENSG00000074603	DPP8	2925.51	-0.0593664	0.178093	-0.333345	0.738874	0.925338
1224	ENSG00000074621	SLC24A1	613.327	0.0296227	0.343246	0.0863018	0.931227	0.9823
1225	ENSG00000074657	ZNF532	618.542	-0.0578199	0.264677	-0.218455	0.827075	0.952729
1226	ENSG00000074660	SCARF1	832.509	0.0617256	0.373898	0.165087	0.868876	0.965993
1227	ENSG00000074695	LMAN1	6511.43	-0.23293	0.15107	-1.54187	0.123105	0.549297
1228	ENSG00000074696	HACD3	2938.85	0.0123696	0.216202	0.0572135	0.954375	0.988617
1229	ENSG00000074706	IPCEF1	1604.92	-0.270573	0.430483	-0.628534	0.529654	0.842382
1230	ENSG00000074755	ZZEF1	8811.99	0.0737169	0.191484	0.384976	0.700255	0.910124
1231	ENSG00000074800	ENO1	50060.8	0.190639	0.226269	0.842532	0.39949	0.781329
1232	ENSG00000074842	MYDGF	4524.77	0.204992	0.235494	0.870479	0.384038	0.773532
1233	ENSG00000074855	ANO8	704.383	0.097692	0.144159	0.677666	0.497983	0.82776
1234	ENSG00000074935	TUBE1	628.304	0.101907	0.243215	0.419	0.675216	0.900887
1235	ENSG00000074964	ARHGEF10L	1276.56	0.328444	0.555171	0.591608	0.554113	0.852007
1236	ENSG00000074966	TXK	927.494	-0.266302	0.349532	-0.761881	0.446131	0.803587
1237	ENSG00000075035	WSCD2	5.77925	-2.33016	0.743251	-3.13509	0.00171804	0.13117
1238	ENSG00000075043	KCNQ2	3.5867	-2.80311	1.11088	-2.52332	0.0116253	0.25282
1239	ENSG00000075073	TACR2	5.08468	0.6855	0.560994	1.22194	0.221731	0.658701
1240	ENSG00000075089	ACTR6	758.245	-0.00466753	0.104151	-0.0448153	0.964255	0.990904
1241	ENSG00000075131	TIPIN	330.722	-0.281319	0.252761	-1.11298	0.265715	0.694556
1242	ENSG00000075142	SRI	1824.68	-0.293617	0.152095	-1.93048	0.0535476	0.415481
1243	ENSG00000075151	EIF4G3	5089.62	0.0676549	0.173812	0.389242	0.697097	0.909042
1244	ENSG00000075188	NUP37	466.892	-0.227355	0.176663	-1.28694	0.198114	0.635532
1245	ENSG00000075213	SEMA3A	277.972	-0.15668	0.617483	-0.25374	0.799697	0.94425
1246	ENSG00000075218	GTSE1	728.203	-1.12163	0.458236	-2.44772	0.0143765	0.271912
1247	ENSG00000075223	SEMA3C	1607.96	0.160721	0.462581	0.347443	0.728259	0.920769
1248	ENSG00000075234	TTC38	1114.76	-0.166953	0.158918	-1.05056	0.293462	0.71409
1249	ENSG00000075239	ACAT1	1842.97	-0.302368	0.199883	-1.51273	0.130348	0.560115
1250	ENSG00000075240	GRAMD4	1903.51	-0.308253	0.352622	-0.874174	0.382023	0.772283
1251	ENSG00000075275	CELSR1	2135.76	0.551165	0.533951	1.03224	0.301961	0.720435
1252	ENSG00000075290	WNT8B	1.01565	0.278152	0.84401	0.32956	0.741732	NA
1253	ENSG00000075292	ZNF638	5859.19	-0.253472	0.198293	-1.27827	0.201154	0.637791
1254	ENSG00000075303	SLC25A40	1863.16	0.265741	0.165147	1.60912	0.10759	0.524667
1255	ENSG00000075336	TIMM21	857.218	0.282062	0.284434	0.991662	0.321362	0.734496
1256	ENSG00000075340	ADD2	184.68	0.699482	0.402044	1.73982	0.0818915	0.476883
1257	ENSG00000075391	RASAL2	4684.88	0.553679	0.479783	1.15402	0.248492	0.681144
1258	ENSG00000075399	VPS9D1	875.051	0.423309	0.144333	2.93287	0.00335848	0.169655
1259	ENSG00000075407	ZNF37A	1716.57	-0.128532	0.113099	-1.13646	0.255766	0.687457
1260	ENSG00000075413	MARK3	3847.16	-0.0741279	0.131368	-0.564275	0.572567	0.861022
1261	ENSG00000075415	SLC25A3	9235.71	0.0981181	0.169117	0.58018	0.561793	0.855493
1262	ENSG00000075420	FNDC3B	6056.36	0.196317	0.303093	0.647712	0.517172	0.834413
1263	ENSG00000075426	FOSL2	8531.56	-0.384495	0.364101	-1.05601	0.290963	0.712427
1264	ENSG00000075429	CACNG5	65.9447	-0.835692	0.408416	-2.04618	0.0407387	0.384304
1265	ENSG00000075461	CACNG4	1.07206	0.193476	1.3344	0.144991	0.884718	NA
1266	ENSG00000075539	FRYL	4689.24	-0.359431	0.186923	-1.92288	0.054495	0.417313
1267	ENSG00000075568	TMEM131	4363.19	0.127477	0.187587	0.67956	0.496783	0.827729
1268	ENSG00000075618	FSCN1	1759.77	0.851222	0.380975	2.23433	0.0254617	0.330785
1269	ENSG00000075624	ACTB	370097	0.300032	0.282731	1.06119	0.288604	0.711182
1270	ENSG00000075643	MOCOS	66.4168	-0.0374886	0.359037	-0.104414	0.916841	0.979853
1271	ENSG00000075651	PLD1	1182.68	0.00629908	0.327462	0.019236	0.984653	0.996613
1272	ENSG00000075673	ATP12A	1.23118	-2.22324	1.70686	-1.30253	0.192735	NA
1273	ENSG00000075702	WDR62	997.461	-1.00393	0.313252	-3.20485	0.00135132	0.120061
1274	ENSG00000075711	DLG1	1896.71	-0.289269	0.133136	-2.17273	0.0298007	0.347315
1275	ENSG00000075785	RAB7A	18448.2	0.247829	0.220687	1.12299	0.261441	0.690919
1276	ENSG00000075790	BCAP29	1452.56	-0.0129143	0.18755	-0.0688581	0.945103	0.985936
1277	ENSG00000075826	SEC31B	1370.11	-0.232503	0.295501	-0.78681	0.431393	0.796433
1278	ENSG00000075856	SART3	2869.21	-0.0493042	0.107779	-0.457454	0.647345	0.890843
1279	ENSG00000075884	ARHGAP15	1780.12	-0.268237	0.235811	-1.13751	0.255325	0.687066
1280	ENSG00000075886	TUBA3D	0.357194	1.4569	2.19486	0.663777	0.506833	NA
1281	ENSG00000075891	PAX2	1.51828	2.15842	1.37271	1.57238	0.115862	NA
1282	ENSG00000075914	EXOSC7	807.115	0.0462017	0.131631	0.350994	0.725593	0.919831
1283	ENSG00000075945	KIFAP3	773.984	-0.205176	0.172258	-1.1911	0.233616	0.668046
1284	ENSG00000075975	MKRN2	1407.29	-0.0222106	0.0776884	-0.285893	0.77496	0.936477
1285	ENSG00000076003	MCM6	2984.14	-0.32998	0.225703	-1.46201	0.143739	0.577128
1286	ENSG00000076043	REXO2	956.63	-0.223652	0.130376	-1.71543	0.0862656	0.48665
1287	ENSG00000076053	RBM7	1239.74	-0.0447035	0.152148	-0.293815	0.768899	0.934353
1288	ENSG00000076067	RBMS2	643.963	-0.293321	0.320691	-0.914654	0.360373	0.759632
1289	ENSG00000076108	BAZ2A	10371.2	-0.104113	0.184871	-0.563165	0.573323	0.861331
1290	ENSG00000076201	PTPN23	2254.81	0.0839064	0.102729	0.816773	0.414058	0.78904
1291	ENSG00000076242	MLH1	2044.83	-0.0759499	0.160337	-0.47369	0.635721	0.887512
1292	ENSG00000076248	UNG	851.206	-0.129479	0.222585	-0.581704	0.560766	0.855276
1293	ENSG00000076258	FMO4	199.562	0.0938715	0.323045	0.290584	0.77137	0.935373
1294	ENSG00000076321	KLHL20	817.739	0.159602	0.14535	1.09806	0.27218	0.70023
1295	ENSG00000076344	RGS11	7.44485	-0.189824	0.63468	-0.299086	0.764874	0.933527
1296	ENSG00000076351	SLC46A1	327.102	1.2714	0.415861	3.05727	0.00223365	0.145385
1297	ENSG00000076356	PLXNA2	293.345	0.419122	0.314177	1.33403	0.182193	0.619453
1298	ENSG00000076382	SPAG5	2044.19	-1.06017	0.447552	-2.36882	0.0178451	0.28769
1299	ENSG00000076513	ANKRD13A	4043.72	0.0137311	0.173864	0.078976	0.937052	0.984004
1300	ENSG00000076554	TPD52	596.264	-0.295455	0.1769	-1.67018	0.0948837	0.50309
1301	ENSG00000076555	ACACB	660.325	0.0983205	0.258589	0.380219	0.703783	0.911189
1302	ENSG00000076604	TRAF4	1567.65	-0.386918	0.454518	-0.851271	0.394619	0.77925
1303	ENSG00000076641	PAG1	4199.67	-0.405409	0.18046	-2.24654	0.0246696	0.326046
1304	ENSG00000076650	GPATCH1	535.312	-0.0990691	0.158533	-0.62491	0.53203	0.843614
1305	ENSG00000076662	ICAM3	2953.43	-0.386008	0.298196	-1.29447	0.195502	0.633224
1306	ENSG00000076685	NT5C2	4360.45	-0.00727323	0.164687	-0.0441639	0.964774	0.991111
1307	ENSG00000076706	MCAM	63.4415	-0.718691	0.448085	-1.60392	0.108733	0.526292
1308	ENSG00000076716	GPC4	14480.4	1.00527	0.486641	2.06573	0.038854	0.378622
1309	ENSG00000076770	MBNL3	1579.41	-0.20232	0.328868	-0.6152	0.538422	0.846042
1310	ENSG00000076826	CAMSAP3	44.9123	-0.77956	0.577163	-1.35068	0.176799	0.613689
1311	ENSG00000076864	RAP1GAP	441.765	0.90359	0.49023	1.8432	0.0653004	0.44507
1312	ENSG00000076924	XAB2	3090.99	-0.245855	0.229182	-1.07275	0.283382	0.707988
1313	ENSG00000076928	ARHGEF1	18386.6	-0.0237445	0.292976	-0.0810458	0.935406	0.983999
1314	ENSG00000076944	STXBP2	7956.76	0.109935	0.0991594	1.10867	0.267571	0.695808
1315	ENSG00000076984	MAP2K7	1953.35	-0.248082	0.170358	-1.45624	0.145326	0.579864
1316	ENSG00000077009	NMRK2	22.9419	-0.211464	0.76473	-0.276521	0.782148	0.938225
1317	ENSG00000077044	DGKD	3424.59	0.232638	0.281482	0.826474	0.408535	0.78627
1318	ENSG00000077063	CTTNBP2	14.4417	-1.47214	0.64442	-2.28444	0.0223458	0.313947
1319	ENSG00000077092	RARB	0.770287	-1.58263	1.56615	-1.01052	0.312246	NA
1320	ENSG00000077097	TOP2B	9023.38	-0.0803531	0.123643	-0.649879	0.515771	0.834077
1321	ENSG00000077147	TM9SF3	8457.63	0.1455	0.277753	0.523846	0.600386	0.873049
1322	ENSG00000077150	NFKB2	7852.39	-0.143751	0.330553	-0.434879	0.66365	0.897058
1323	ENSG00000077152	UBE2T	445.674	-1.17078	0.508813	-2.301	0.0213915	0.307653
1324	ENSG00000077157	PPP1R12B	1242.25	0.0385769	0.262814	0.146784	0.883302	0.969929
1325	ENSG00000077232	DNAJC10	4611.15	0.25878	0.340606	0.759763	0.447396	0.803753
1326	ENSG00000077235	GTF3C1	4631.88	0.102476	0.141058	0.726482	0.467543	0.813403
1327	ENSG00000077238	IL4R	7670.93	-0.149978	0.14881	-1.00785	0.313526	0.730149
1328	ENSG00000077254	USP33	2706.85	-0.0240788	0.119416	-0.201639	0.840199	0.956517
1329	ENSG00000077264	PAK3	43.5047	-0.742467	0.456176	-1.62759	0.103612	0.518031
1330	ENSG00000077279	DCX	0.429757	-0.434278	1.13039	-0.384183	0.700843	NA
1331	ENSG00000077312	SNRPA	2293.76	-0.418405	0.249892	-1.67435	0.0940628	0.50254
1332	ENSG00000077327	SPAG6	17.7995	-0.665194	0.752528	-0.883946	0.376725	0.76973
1333	ENSG00000077348	EXOSC5	348.292	0.225077	0.239631	0.939264	0.347595	0.750603
1334	ENSG00000077380	DYNC1I2	3775.83	0.00303857	0.142684	0.0212957	0.98301	0.996178
1335	ENSG00000077420	APBB1IP	4128.16	-0.110864	0.148706	-0.745524	0.455955	0.807573
1336	ENSG00000077454	LRCH4	3399.51	0.0827887	0.142746	0.579972	0.561934	0.855493
1337	ENSG00000077458	FAM76B	902.932	-0.138688	0.179361	-0.773234	0.439384	0.800021
1338	ENSG00000077463	SIRT6	740.373	-0.00320622	0.122359	-0.0262034	0.979095	0.99569
1339	ENSG00000077514	POLD3	1207.64	-0.161281	0.217372	-0.741958	0.458113	0.808972
1340	ENSG00000077522	ACTN2	30.6558	1.86127	0.663281	2.80615	0.00501374	0.19932
1341	ENSG00000077549	CAPZB	12772.4	0.0581114	0.126778	0.45837	0.646686	0.890828
1342	ENSG00000077585	GPR137B	2007.76	0.170498	0.311271	0.547749	0.583864	0.86603
1343	ENSG00000077616	NAALAD2	1.87498	-1.67659	1.54586	-1.08457	0.278112	NA
1344	ENSG00000077684	JADE1	1639.08	-0.152143	0.154964	-0.981796	0.326201	0.737407
1345	ENSG00000077713	SLC25A43	1035.73	0.276529	0.325115	0.850558	0.395015	0.779497
1346	ENSG00000077721	UBE2A	3078.69	-0.0165743	0.0877231	-0.188938	0.850141	0.959877
1347	ENSG00000077782	FGFR1	3870.02	0.291925	0.359235	0.812629	0.416431	0.789698
1348	ENSG00000077800	FKBP6	0.956277	-0.29723	0.790759	-0.37588	0.707006	NA
1349	ENSG00000077935	SMC1B	17.662	-0.906283	0.563092	-1.60947	0.107513	0.524667
1350	ENSG00000077942	FBLN1	10.3728	-1.14533	0.481655	-2.37791	0.0174111	0.285602
1351	ENSG00000077943	ITGA8	4.70754	-0.143724	0.548504	-0.262029	0.793299	0.941998
1352	ENSG00000077984	CST7	6151.3	-0.9107	0.486406	-1.8723	0.0611644	0.435039
1353	ENSG00000078018	MAP2	23.4792	0.748414	0.577862	1.29514	0.19527	0.632828
1354	ENSG00000078043	PIAS2	824.449	0.0146716	0.222164	0.0660396	0.947346	0.986628
1355	ENSG00000078053	AMPH	0.865877	-0.0562601	0.883114	-0.0637065	0.949204	NA
1356	ENSG00000078061	ARAF	2595.58	0.0523869	0.0898814	0.582844	0.559998	0.85495
1357	ENSG00000078070	MCCC1	1245.36	-0.0873965	0.116633	-0.749328	0.453659	0.80678
1358	ENSG00000078081	LAMP3	536.969	0.776827	0.373875	2.07777	0.0377303	0.374422
1359	ENSG00000078098	FAP	1.43011	0.985933	1.05292	0.936383	0.349076	NA
1360	ENSG00000078114	NEBL	7.77491	0.97547	0.62639	1.55729	0.119402	0.545132
1361	ENSG00000078124	ACER3	3216.17	0.17264	0.382597	0.451231	0.651823	0.892331
1362	ENSG00000078140	UBE2K	3123.31	0.100339	0.142234	0.705448	0.480532	0.819586
1363	ENSG00000078142	PIK3C3	2091.8	-0.043264	0.0979103	-0.441874	0.658581	0.894859
1364	ENSG00000078177	N4BP2	1532.99	-0.278775	0.177135	-1.5738	0.115534	0.537536
1365	ENSG00000078237	TIGAR	3893.41	0.196489	0.399656	0.491645	0.62297	0.882409
1366	ENSG00000078246	TULP3	469.653	-0.33063	0.221623	-1.49186	0.135737	0.56783
1367	ENSG00000078269	SYNJ2	1375.06	-0.339348	0.215148	-1.57728	0.114732	0.535873
1368	ENSG00000078295	ADCY2	31.5182	0.0449795	0.272888	0.164828	0.86908	0.966005
1369	ENSG00000078304	PPP2R5C	8350.69	-0.357831	0.172538	-2.07393	0.0380861	0.375522
1370	ENSG00000078319	PMS2P1	292.863	-0.609782	0.247609	-2.46268	0.0137903	0.267721
1371	ENSG00000078328	RBFOX1	0.283157	-0.788205	2.02579	-0.389086	0.697213	NA
1372	ENSG00000078369	GNB1	18189.4	0.067849	0.161007	0.421404	0.67346	0.900612
1373	ENSG00000078399	HOXA9	61.6623	-1.0442	0.40355	-2.58754	0.00966631	0.237295
1374	ENSG00000078401	EDN1	80.3726	1.02907	0.568969	1.80866	0.0705045	0.455519
1375	ENSG00000078403	MLLT10	1710.23	0.0510957	0.121776	0.419586	0.674788	0.900887
1376	ENSG00000078487	ZCWPW1	322.375	-0.120194	0.309058	-0.388905	0.697347	0.909077
1377	ENSG00000078579	FGF20	0.263335	-0.712021	2.19797	-0.323945	0.74598	NA
1378	ENSG00000078589	P2RY10	2233.49	-0.273653	0.422726	-0.647353	0.517403	0.834447
1379	ENSG00000078596	ITM2A	1413.28	-0.533619	0.406073	-1.3141	0.188814	0.625809
1380	ENSG00000078618	NRDC	8833.49	-0.185534	0.113311	-1.63739	0.101549	0.51514
1381	ENSG00000078668	VDAC3	3449.34	-0.061434	0.144984	-0.42373	0.671763	0.900179
1382	ENSG00000078674	PCM1	8353.53	-0.0317604	0.145164	-0.218791	0.826813	0.952729
1383	ENSG00000078687	TNRC6C	1696.24	-0.130561	0.246709	-0.52921	0.59666	0.870801
1384	ENSG00000078699	CBFA2T2	2185.01	-0.166513	0.158374	-1.05139	0.293081	0.713929
1385	ENSG00000078725	BRINP1	1.71652	-3.33572	1.46217	-2.28135	0.0225277	NA
1386	ENSG00000078747	ITCH	5257.64	0.109261	0.136466	0.800642	0.423339	0.793122
1387	ENSG00000078795	PKD2L2	56.5263	-0.185214	0.387448	-0.478036	0.632624	0.885517
1388	ENSG00000078804	TP53INP2	1426.99	0.416499	0.224071	1.85878	0.0630584	0.438695
1389	ENSG00000078808	SDF4	9017.11	0.163589	0.189216	0.864564	0.387278	0.775737
1390	ENSG00000078814	MYH7B	186.826	-0.0399671	0.311565	-0.128278	0.897929	0.974301
1391	ENSG00000078900	TP73	130.207	-1.8588	0.492638	-3.77316	0.000161192	0.0437427
1392	ENSG00000078902	TOLLIP	3360.78	0.314513	0.238396	1.31929	0.187073	0.623491
1393	ENSG00000078967	UBE2D4	836.85	0.136621	0.396493	0.344573	0.730416	0.921737
1394	ENSG00000079101	CLUL1	1.33545	1.42533	0.887394	1.6062	0.10823	NA
1395	ENSG00000079102	RUNX1T1	1.26539	-2.593	1.41757	-1.82918	0.067372	NA
1396	ENSG00000079112	CDH17	24.1889	-1.34814	0.692269	-1.94742	0.0514849	0.410962
1397	ENSG00000079134	THOC1	1418.79	-0.226809	0.154371	-1.46925	0.141765	0.574513
1398	ENSG00000079150	FKBP7	86.345	-0.670284	0.328308	-2.04163	0.0411882	0.384701
1399	ENSG00000079156	OSBPL6	27.3388	-0.570902	0.44311	-1.2884	0.197608	0.635334
1400	ENSG00000079215	SLC1A3	5891.22	0.139477	0.530118	0.263106	0.792469	0.941639
1401	ENSG00000079246	XRCC5	11443.8	0.0339684	0.189752	0.179014	0.857926	0.962506
1402	ENSG00000079257	LXN	502.108	-0.167723	0.252341	-0.664668	0.506263	0.830511
1403	ENSG00000079263	SP140	2533.06	-0.602745	0.347726	-1.73339	0.0830262	0.479
1404	ENSG00000079277	MKNK1	3690.62	0.133265	0.240323	0.554524	0.57922	0.864041
1405	ENSG00000079308	TNS1	5591.91	0.174336	0.538062	0.324007	0.745932	0.928085
1406	ENSG00000079313	REXO1	1830.77	-0.209658	0.234919	-0.89247	0.372141	0.766284
1407	ENSG00000079332	SAR1A	3755.25	-0.223376	0.12267	-1.82095	0.0686149	0.453737
1408	ENSG00000079335	CDC14A	890.814	-0.246103	0.275762	-0.892446	0.372154	0.766284
1409	ENSG00000079337	RAPGEF3	876.118	0.49852	0.45175	1.10353	0.269796	0.697931
1410	ENSG00000079385	CEACAM1	222.037	-1.22648	0.490034	-2.50285	0.0123199	0.259213
1411	ENSG00000079387	SENP1	1287.31	-0.268692	0.160929	-1.66963	0.0949919	0.50309
1412	ENSG00000079393	DUSP13	55.2314	-0.0589436	0.733311	-0.0803801	0.935935	0.984004
1413	ENSG00000079432	CIC	4184.73	-0.0432148	0.205986	-0.209795	0.833828	0.953762
1414	ENSG00000079435	LIPE	209.092	-0.541648	0.387554	-1.39761	0.162231	0.598262
1415	ENSG00000079459	FDFT1	3585.63	-0.128626	0.140406	-0.916102	0.359614	0.759055
1416	ENSG00000079462	PAFAH1B3	309.059	-0.290847	0.217115	-1.3396	0.180376	0.617416
1417	ENSG00000079482	OPHN1	387.063	0.534786	0.353418	1.51318	0.130233	0.560008
1418	ENSG00000079616	KIF22	2865.38	-0.75299	0.291937	-2.57929	0.00990036	0.238124
1419	ENSG00000079691	CARMIL1	945.141	1.43215	0.427143	3.35284	0.000799856	0.0909181
1420	ENSG00000079739	PGM1	939.213	-0.808551	0.193622	-4.17592	2.96788e-05	0.0157651
1421	ENSG00000079785	DDX1	2586.14	0.143831	0.158536	0.907245	0.364277	0.761388
1422	ENSG00000079805	DNM2	11281.6	-0.0081005	0.0746629	-0.108494	0.913604	0.979517
1423	ENSG00000079819	EPB41L2	2953.38	-0.0424528	0.346612	-0.122479	0.90252	0.976095
1424	ENSG00000079841	RIMS1	1.55599	-2.73938	1.1868	-2.3082	0.0209879	NA
1425	ENSG00000079931	MOXD1	8.54397	0.934183	0.58977	1.58398	0.113198	0.533127
1426	ENSG00000079950	STX7	3766.77	0.1796	0.331348	0.542029	0.587799	0.867956
1427	ENSG00000079974	RABL2B	1338.06	0.160159	0.165663	0.966777	0.333656	0.741834
1428	ENSG00000079999	KEAP1	3314.91	-0.0583906	0.106077	-0.550453	0.582009	0.865216
1429	ENSG00000080007	DDX43	56.274	-0.401913	0.508767	-0.789974	0.429543	0.796433
1430	ENSG00000080031	PTPRH	21.1802	0.415685	0.414125	1.00377	0.31549	0.731611
1431	ENSG00000080166	DCT	7.32622	-0.214966	0.447605	-0.48026	0.631043	0.885229
1432	ENSG00000080189	SLC35C2	2123.82	0.0108627	0.0902121	0.120413	0.904156	0.97669
1433	ENSG00000080200	CRYBG3	1851.17	0.352416	0.376997	0.934798	0.349892	0.752431
1434	ENSG00000080224	EPHA6	0.319373	-0.72582	2.53788	-0.285994	0.774882	NA
1435	ENSG00000080298	RFX3	457.708	-0.340937	0.205935	-1.65556	0.0978116	0.509378
1436	ENSG00000080345	RIF1	3802.71	-0.0375097	0.177933	-0.210808	0.833037	0.953538
1437	ENSG00000080371	RAB21	4336.23	0.093522	0.146744	0.637313	0.523921	0.839012
1438	ENSG00000080493	SLC4A4	143.401	-0.844164	0.488926	-1.72657	0.0842456	0.482481
1439	ENSG00000080503	SMARCA2	7299.38	-0.11767	0.179664	-0.654942	0.512505	0.83313
1440	ENSG00000080511	RDH8	1.34447	1.34915	0.824314	1.6367	0.101694	NA
1441	ENSG00000080546	SESN1	1544.25	-0.209316	0.13911	-1.50467	0.132408	0.563357
1442	ENSG00000080561	MID2	128.853	0.361303	0.223419	1.61716	0.105844	0.522338
1443	ENSG00000080572	PIH1D3	5.12878	-0.899888	0.745937	-1.20639	0.227669	0.663786
1444	ENSG00000080573	COL5A3	310.559	0.155406	0.531256	0.292526	0.769885	0.935049
1445	ENSG00000080603	SRCAP	7357.33	0.113073	0.266225	0.424729	0.671034	0.899976
1446	ENSG00000080608	PUM3	1350.14	-0.0724024	0.226641	-0.319458	0.749379	0.92904
1447	ENSG00000080618	CPB2	1.67458	-0.200159	0.860761	-0.232537	0.816121	NA
1448	ENSG00000080644	CHRNA3	6.6093	-2.76603	0.835339	-3.31127	0.000928737	0.0987092
1449	ENSG00000080709	KCNN2	13.6493	-0.535882	0.579797	-0.924259	0.355351	0.756197
1450	ENSG00000080802	CNOT4	1690.08	-0.115673	0.0715858	-1.61586	0.106124	0.522956
1451	ENSG00000080815	PSEN1	6069.25	0.27493	0.215678	1.27472	0.202407	0.639763
1452	ENSG00000080819	CPOX	1862.25	-0.389326	0.190032	-2.04874	0.040488	0.383614
1453	ENSG00000080822	CLDND1	7595.91	-0.4687	0.361496	-1.29656	0.194784	0.63261
1454	ENSG00000080823	MOK	62.0771	-0.139594	0.338381	-0.412535	0.679947	0.902114
1455	ENSG00000080824	HSP90AA1	119599	-0.190375	0.382126	-0.498199	0.618344	0.881744
1456	ENSG00000080839	RBL1	1545.37	-0.43451	0.195336	-2.22442	0.0261201	0.333087
1457	ENSG00000080845	DLGAP4	4274.49	-0.0583021	0.215464	-0.270589	0.786707	0.939443
1458	ENSG00000080854	IGSF9B	601.769	-0.951994	0.314987	-3.02233	0.0025084	0.150479
1459	ENSG00000080910	CFHR2	22.5618	0.353012	0.355858	0.992004	0.321196	0.734496
1460	ENSG00000080947	CROCCP3	234.092	0.535133	0.362435	1.47649	0.139811	0.572311
1461	ENSG00000080986	NDC80	990.137	-1.15471	0.463091	-2.49348	0.0126499	0.261437
1462	ENSG00000081014	AP4E1	1987.75	0.293124	0.233961	1.25288	0.21025	0.647318
1463	ENSG00000081019	RSBN1	1503.35	-0.244299	0.220897	-1.10594	0.268754	0.696583
1464	ENSG00000081026	MAGI3	109.712	-0.573186	0.397734	-1.44113	0.149549	0.583431
1465	ENSG00000081041	CXCL2	339.291	0.208727	0.517624	0.403241	0.686771	0.904303
1466	ENSG00000081052	COL4A4	35.1352	-0.76644	0.610949	-1.25451	0.209657	0.646666
1467	ENSG00000081059	TCF7	4599.26	0.463352	0.257579	1.79887	0.0720394	0.459463
1468	ENSG00000081087	OSTM1	3736.73	0.324716	0.353933	0.917451	0.358907	0.75859
1469	ENSG00000081138	CDH7	8.90581	-0.41172	0.402036	-1.02409	0.305794	0.724201
1470	ENSG00000081148	IMPG2	28.0301	-0.148028	0.323224	-0.457973	0.646972	0.890843
1471	ENSG00000081154	PCNP	3789.18	-0.0248917	0.0700338	-0.355423	0.722273	0.918703
1472	ENSG00000081177	EXD2	511.268	0.358273	0.27395	1.3078	0.190941	0.628646
1473	ENSG00000081181	ARG2	173.053	0.0984386	0.463187	0.212525	0.831698	0.953359
1474	ENSG00000081189	MEF2C	540.054	0.396833	0.459807	0.863042	0.388114	0.776018
1475	ENSG00000081237	PTPRC	39232.3	-0.293681	0.227869	-1.28881	0.197463	0.635292
1476	ENSG00000081307	UBA5	1388.69	-0.0210277	0.118959	-0.176764	0.859694	0.963345
1477	ENSG00000081320	STK17B	7928.54	-0.558627	0.278235	-2.00775	0.0446697	0.391498
1478	ENSG00000081377	CDC14B	283.015	-0.86559	0.312848	-2.7668	0.0056609	0.21094
1479	ENSG00000081386	ZNF510	689.562	-0.338368	0.189788	-1.78288	0.0746062	0.463651
1480	ENSG00000081479	LRP2	2.09102	-0.296732	1.0018	-0.2962	0.767078	NA
1481	ENSG00000081665	ZNF506	1247.56	0.0216654	0.168859	0.128305	0.897908	0.974301
1482	ENSG00000081692	JMJD4	414.598	0.041232	0.174727	0.235979	0.813449	0.948043
1483	ENSG00000081721	DUSP12	792.984	-0.391295	0.20975	-1.86553	0.0621067	0.437397
1484	ENSG00000081760	AACS	768.402	-0.220807	0.138017	-1.59985	0.109632	0.5274
1485	ENSG00000081791	DELE1	2050.35	-0.00454108	0.169466	-0.0267964	0.978622	0.995672
1486	ENSG00000081800	SLC13A1	11.2981	-0.497179	0.360754	-1.37816	0.168153	0.604611
1487	ENSG00000081803	CADPS2	3.72729	-1.9813	0.762398	-2.59878	0.00935559	0.234745
1488	ENSG00000081818	PCDHB4	0.383377	0.673501	1.45492	0.462914	0.643426	NA
1489	ENSG00000081853	PCDHGA2	5.44052	0.179357	0.680986	0.263379	0.792259	0.94148
1490	ENSG00000081870	HSPB11	788.319	-0.445747	0.192767	-2.31236	0.0207577	0.304837
1491	ENSG00000081913	PHLPP1	536.855	-0.114001	0.200492	-0.568607	0.569623	0.859556
1492	ENSG00000081923	ATP8B1	47.6084	-0.87887	0.599768	-1.46535	0.142825	0.576069
1493	ENSG00000081985	IL12RB2	1789.03	-1.58318	0.563535	-2.80938	0.00496368	0.198595
1494	ENSG00000082014	SMARCD3	200.783	-0.0511994	0.262062	-0.195372	0.845102	0.958365
1495	ENSG00000082068	WDR70	918.95	-0.251446	0.143039	-1.75788	0.0787675	0.472151
1496	ENSG00000082074	FYB1	12507	0.00546262	0.26143	0.0208952	0.983329	0.996178
1497	ENSG00000082126	MPP4	11.192	-0.0280997	0.341667	-0.082243	0.934453	0.983333
1498	ENSG00000082146	STRADB	928.129	0.140657	0.255713	0.55006	0.582278	0.865406
1499	ENSG00000082153	BZW1	17812.4	0.229251	0.263518	0.869961	0.384322	0.773669
1500	ENSG00000082196	C1QTNF3	73.1122	0.426977	0.361137	1.18232	0.23708	0.67088
1501	ENSG00000082212	ME2	5823.7	0.104708	0.198197	0.528304	0.597288	0.871012
1502	ENSG00000082213	C5orf22	1280.91	0.0861339	0.176957	0.486751	0.626435	0.883892
1503	ENSG00000082258	CCNT2	1798	0.0423002	0.133402	0.317089	0.751176	0.929138
1504	ENSG00000082269	FAM135A	611.085	0.140288	0.198611	0.706342	0.479976	0.819524
1505	ENSG00000082293	COL19A1	45.5944	0.686653	0.561003	1.22397	0.220962	0.657827
1506	ENSG00000082397	EPB41L3	3827.64	-0.449181	0.444449	-1.01065	0.312186	0.729316
1507	ENSG00000082438	COBLL1	193.472	1.00068	0.553274	1.80866	0.0705039	0.455519
1508	ENSG00000082458	DLG3	1011.44	-1.11744	0.471747	-2.36872	0.0178496	0.28769
1509	ENSG00000082497	SERTAD4	1.2782	-0.778308	0.955013	-0.814971	0.415089	NA
1510	ENSG00000082512	TRAF5	1490.49	0.134967	0.180465	0.747888	0.454528	0.807167
1511	ENSG00000082515	MRPL22	967.872	-0.532382	0.268553	-1.98241	0.0474335	0.398064
1512	ENSG00000082516	GEMIN5	1035.16	0.230402	0.162028	1.42199	0.155029	0.590952
1513	ENSG00000082556	OPRK1	2.94019	-0.654567	0.667589	-0.980494	0.326843	0.737923
1514	ENSG00000082641	NFE2L1	14148	0.318031	0.274569	1.15829	0.246744	0.679713
1515	ENSG00000082684	SEMA5B	9.16306	0.478353	0.254736	1.87784	0.060403	0.433349
1516	ENSG00000082701	GSK3B	3427.78	-0.146102	0.137379	-1.0635	0.287557	0.710825
1517	ENSG00000082781	ITGB5	5916.17	0.159371	0.562592	0.283279	0.776963	0.937104
1518	ENSG00000082805	ERC1	2437.03	0.180555	0.220885	0.817417	0.41369	0.788803
1519	ENSG00000082898	XPO1	10505	0.0715942	0.16793	0.426332	0.669866	0.899423
1520	ENSG00000082996	RNF13	6310.08	0.283504	0.328792	0.862258	0.388546	0.776018
1521	ENSG00000083067	TRPM3	151.223	-0.411942	0.343962	-1.19764	0.231057	0.666411
1522	ENSG00000083093	PALB2	831.886	0.132833	0.168856	0.786661	0.43148	0.796535
1523	ENSG00000083097	DOP1A	1023.42	-0.333678	0.186108	-1.79292	0.0729853	0.460449
1524	ENSG00000083099	LYRM2	1743.71	0.342057	0.237435	1.44063	0.149688	0.583491
1525	ENSG00000083123	BCKDHB	336.253	-0.253963	0.19129	-1.32763	0.1843	0.620742
1526	ENSG00000083168	KAT6A	6006.27	-0.163334	0.155618	-1.04958	0.293911	0.714424
1527	ENSG00000083223	TUT7	4397.78	-0.0219442	0.121224	-0.181022	0.85635	0.961877
1528	ENSG00000083290	ULK2	959.115	0.166254	0.385223	0.431579	0.666048	0.898504
1529	ENSG00000083307	GRHL2	2.2244	-1.72979	0.821204	-2.10641	0.035169	NA
1530	ENSG00000083312	TNPO1	8403.81	0.234609	0.293235	0.800069	0.423671	0.793362
1531	ENSG00000083444	PLOD1	5169.89	0.215943	0.319684	0.675491	0.499364	0.827803
1532	ENSG00000083454	P2RX5	3400.37	-1.99768	0.579611	-3.44659	0.000567719	0.0795919
1533	ENSG00000083457	ITGAE	2695.55	-0.287159	0.223702	-1.28367	0.199259	0.635973
1534	ENSG00000083520	DIS3	2860.25	0.0808265	0.174698	0.462664	0.643605	0.889545
1535	ENSG00000083535	PIBF1	561.758	-0.109319	0.180641	-0.605174	0.545064	0.84868
1536	ENSG00000083544	TDRD3	3335.62	0.129755	0.402222	0.322595	0.747002	0.928237
1537	ENSG00000083635	NUFIP1	329.472	0.120183	0.132198	0.909109	0.363293	0.760839
1538	ENSG00000083642	PDS5B	2387.92	-0.260406	0.133016	-1.9577	0.0502654	0.40772
1539	ENSG00000083720	OXCT1	1472.97	-0.71143	0.34349	-2.07118	0.0383416	0.376716
1540	ENSG00000083750	RRAGB	289.544	0.0188379	0.219491	0.0858254	0.931605	0.9823
1541	ENSG00000083782	EPYC	1.90726	-3.69062	1.3399	-2.75441	0.00587987	NA
1542	ENSG00000083799	CYLD	6561.1	-0.319744	0.176516	-1.81141	0.0700771	0.455519
1543	ENSG00000083807	SLC27A5	175.499	-0.652096	0.273095	-2.3878	0.0169498	0.28365
1544	ENSG00000083812	ZNF324	430.289	0.00517674	0.135262	0.0382718	0.969471	0.992855
1545	ENSG00000083814	ZNF671	591.12	-0.190616	0.197558	-0.964859	0.334615	0.742975
1546	ENSG00000083817	ZNF416	152.856	-0.147003	0.205117	-0.716677	0.473573	0.816359
1547	ENSG00000083828	ZNF586	668.127	0.119852	0.153747	0.779539	0.435662	0.798342
1548	ENSG00000083838	ZNF446	229.494	0.176084	0.195197	0.902084	0.367012	0.762612
1549	ENSG00000083844	ZNF264	2075.49	-0.191312	0.123708	-1.54647	0.121991	0.547674
1550	ENSG00000083845	RPS5	6934.35	-0.19762	0.186066	-1.06209	0.288194	0.710942
1551	ENSG00000083857	FAT1	50.4935	1.55268	0.599111	2.59163	0.00955219	0.235892
1552	ENSG00000083896	YTHDC1	4328.95	-0.00943099	0.182513	-0.0516731	0.958789	0.989751
1553	ENSG00000083937	CHMP2B	1735.04	0.127134	0.133683	0.951016	0.341596	0.747135
1554	ENSG00000084070	SMAP2	7972.32	-0.186835	0.161074	-1.15994	0.246075	0.678991
1555	ENSG00000084072	PPIE	1424.11	-0.220053	0.145003	-1.51757	0.129122	0.557543
1556	ENSG00000084073	ZMPSTE24	3124.27	0.261236	0.269984	0.967599	0.333245	0.741321
1557	ENSG00000084090	STARD7	8525.56	0.295746	0.230483	1.28316	0.199436	0.63631
1558	ENSG00000084092	NOA1	980.781	-0.176766	0.138737	-1.27411	0.202624	0.639937
1559	ENSG00000084093	REST	3687.99	-0.0236041	0.193063	-0.122261	0.902692	0.976095
1560	ENSG00000084110	HAL	44.3361	0.482424	0.580263	0.831389	0.405754	0.784686
1561	ENSG00000084112	SSH1	5765.9	-0.119429	0.193379	-0.61759	0.536846	0.845071
1562	ENSG00000084207	GSTP1	7450.07	-0.360669	0.162068	-2.22542	0.026053	0.332706
1563	ENSG00000084234	APLP2	62434.9	0.449911	0.43661	1.03046	0.302792	0.721175
1564	ENSG00000084444	FAM234B	328.368	0.208312	0.256125	0.813323	0.416033	0.789487
1565	ENSG00000084453	SLCO1A2	12.2209	-0.161422	0.346369	-0.46604	0.641187	0.889346
1566	ENSG00000084463	WBP11	5103.19	-0.0217896	0.118966	-0.183159	0.854673	0.961204
1567	ENSG00000084623	EIF3I	5534.79	0.0747001	0.123216	0.606252	0.544348	0.848379
1568	ENSG00000084628	NKAIN1	2.56591	2.55246	0.991291	2.57488	0.0100274	0.239496
1569	ENSG00000084636	COL16A1	3.96582	-1.17998	1.20437	-0.979748	0.327211	0.738168
1570	ENSG00000084652	TXLNA	5194.12	-0.00605515	0.0759639	-0.0797109	0.936467	0.984004
1571	ENSG00000084674	APOB	0.0510627	-0.000232479	2.98047	-7.80009e-05	0.999938	NA
1572	ENSG00000084676	NCOA1	4380.71	0.0107543	0.141088	0.0762241	0.939241	0.984291
1573	ENSG00000084693	AGBL5	571.757	-0.184954	0.127991	-1.44505	0.148444	0.582986
1574	ENSG00000084710	EFR3B	268.588	0.982718	0.429377	2.2887	0.0220966	0.312644
1575	ENSG00000084731	KIF3C	404.557	-0.384634	0.23469	-1.6389	0.101234	0.515096
1576	ENSG00000084733	RAB10	8773.89	0.186658	0.206863	0.902326	0.366884	0.762612
1577	ENSG00000084734	GCKR	2.02387	-1.11156	1.57506	-0.705729	0.480357	NA
1578	ENSG00000084754	HADHA	15564.2	0.250308	0.206393	1.21278	0.225215	0.661873
1579	ENSG00000084764	MAPRE3	460.144	0.344449	0.273131	1.26111	0.207269	0.644831
1580	ENSG00000084774	CAD	2834	-0.00485201	0.227695	-0.0213092	0.982999	0.996178
1581	ENSG00000085063	CD59	7412.42	-0.153322	0.361356	-0.424296	0.67135	0.899976
1582	ENSG00000085117	CD82	8564.14	-0.184491	0.247561	-0.745234	0.45613	0.807573
1583	ENSG00000085185	BCORL1	789.571	-0.156961	0.177694	-0.883319	0.377064	0.770044
1584	ENSG00000085224	ATRX	5724.7	-0.227227	0.195115	-1.16458	0.24419	0.677437
1585	ENSG00000085231	AK6	704.796	0.160381	0.170286	0.941835	0.346277	0.749951
1586	ENSG00000085265	FCN1	3080.94	1.05149	0.608469	1.7281	0.0839711	0.481604
1587	ENSG00000085274	MYNN	789.701	0.0195609	0.123496	0.158393	0.874147	0.96716
1588	ENSG00000085276	MECOM	9.94498	-0.303945	0.50756	-0.598835	0.549283	0.849969
1589	ENSG00000085365	SCAMP1	1591.99	0.18427	0.312026	0.590561	0.554815	0.852285
1590	ENSG00000085377	PREP	2525.69	-0.0233317	0.151936	-0.153562	0.877955	0.968105
1591	ENSG00000085382	HACE1	447.568	-0.323802	0.151889	-2.13184	0.0330199	0.35672
1592	ENSG00000085415	SEH1L	1825.66	0.328134	0.250147	1.31176	0.1896	0.62671
1593	ENSG00000085433	WDR47	924.027	0.168995	0.20597	0.820487	0.411938	0.788
1594	ENSG00000085449	WDFY1	5428.95	0.299267	0.231407	1.29325	0.195925	0.633942
1595	ENSG00000085465	OVGP1	115.797	0.598095	0.45362	1.31849	0.187339	0.623779
1596	ENSG00000085491	SLC25A24	3685.45	0.17787	0.319028	0.557536	0.577161	0.862973
1597	ENSG00000085511	MAP3K4	1947.46	-0.0884914	0.1231	-0.718859	0.472228	0.815783
1598	ENSG00000085514	PILRA	4385.94	0.0178828	0.368715	0.0485003	0.961318	0.990263
1599	ENSG00000085552	IGSF9	4.82216	0.213716	0.640475	0.333684	0.738618	0.925338
1600	ENSG00000085563	ABCB1	1867.31	-0.259205	0.365114	-0.709928	0.477749	0.818745
1601	ENSG00000085644	ZNF213	696.201	-0.0766364	0.106655	-0.718544	0.472422	0.815783
1602	ENSG00000085662	AKR1B1	4427.48	0.319796	0.252417	1.26693	0.205179	0.642128
1603	ENSG00000085719	CPNE3	2675.38	-0.0738036	0.251256	-0.293739	0.768957	0.934353
1604	ENSG00000085721	RRN3	2526.4	0.281586	0.124653	2.25896	0.0238862	0.320442
1605	ENSG00000085733	CTTN	2593.8	0.871765	0.450217	1.93632	0.0528284	0.413919
1606	ENSG00000085741	WNT11	100.619	-0.615518	0.459407	-1.33981	0.180308	0.617416
1607	ENSG00000085760	MTIF2	2591.49	0.33257	0.178699	1.86106	0.0627363	0.438135
1608	ENSG00000085788	DDHD2	1518.12	-0.0676653	0.184326	-0.367096	0.713547	0.915269
1609	ENSG00000085831	TTC39A	15.8227	-1.11062	0.461145	-2.4084	0.0160225	0.279416
1610	ENSG00000085832	EPS15	4285.29	-0.204529	0.144925	-1.41128	0.158162	0.594052
1611	ENSG00000085840	ORC1	634.603	-0.794866	0.346781	-2.29213	0.0218983	0.311517
1612	ENSG00000085871	MGST2	848.648	-0.0559691	0.355517	-0.15743	0.874906	0.967228
1613	ENSG00000085872	CHERP	2079.81	0.195531	0.100541	1.94479	0.0517999	0.411174
1614	ENSG00000085978	ATG16L1	1464.65	0.0270358	0.172625	0.156615	0.875548	0.967423
1615	ENSG00000085982	USP40	1285.09	0.259649	0.341694	0.759889	0.447321	0.803753
1616	ENSG00000085998	POMGNT1	1790.63	0.0120752	0.162161	0.074464	0.940641	0.984706
1617	ENSG00000085999	RAD54L	477.668	-1.4529	0.478923	-3.03368	0.00241587	0.14917
1618	ENSG00000086015	MAST2	2652.5	0.091097	0.166128	0.548355	0.583448	0.865791
1619	ENSG00000086061	DNAJA1	13959.8	0.0938332	0.306392	0.306252	0.759413	0.931513
1620	ENSG00000086062	B4GALT1	8464.61	0.136752	0.176178	0.776212	0.437624	0.799365
1621	ENSG00000086065	CHMP5	2285.54	0.0710136	0.086316	0.822717	0.410669	0.787575
1622	ENSG00000086102	NFX1	3164.58	0.169928	0.0497813	3.41349	0.000641357	0.0821135
1623	ENSG00000086159	AQP6	37.2186	0.412226	0.277306	1.48654	0.137136	0.569374
1624	ENSG00000086189	DIMT1	724.342	0.163972	0.122603	1.33742	0.181086	0.618043
1625	ENSG00000086200	IPO11	746.571	-0.0351839	0.214049	-0.164373	0.869437	0.966102
1626	ENSG00000086205	FOLH1	0.0261145	-0.36539	2.98101	-0.122572	0.902446	NA
1627	ENSG00000086232	EIF2AK1	5798.57	-0.108723	0.115934	-0.9378	0.348347	0.751087
1628	ENSG00000086288	NME8	56.4205	-1.08277	0.50537	-2.14252	0.0321514	0.353765
1629	ENSG00000086289	EPDR1	734.531	-1.08256	0.393421	-2.75166	0.00592949	0.21508
1630	ENSG00000086300	SNX10	6712.04	0.285796	0.323658	0.883017	0.377227	0.770251
1631	ENSG00000086475	SEPHS1	1493.44	-0.0267059	0.184702	-0.144589	0.885036	0.970121
1632	ENSG00000086504	MRPL28	1867.34	-0.251991	0.119176	-2.11444	0.0344776	0.362946
1633	ENSG00000086506	HBQ1	0.903607	-0.0394038	0.795059	-0.0495608	0.960472	NA
1634	ENSG00000086544	ITPKC	637.933	0.291141	0.1398	2.08255	0.0372922	0.373289
1635	ENSG00000086548	CEACAM6	5.67597	1.8107	0.793165	2.28288	0.0224375	0.314225
1636	ENSG00000086570	FAT2	54.6786	0.425102	0.535854	0.793317	0.427593	0.795589
1637	ENSG00000086589	RBM22	2542.74	-0.0847788	0.103636	-0.818046	0.413331	0.788534
1638	ENSG00000086598	TMED2	9389.14	0.11494	0.186039	0.61783	0.536687	0.845071
1639	ENSG00000086619	ERO1B	642.494	0.0287963	0.298724	0.0963977	0.923205	0.980616
1640	ENSG00000086666	ZFAND6	3660.11	0.253275	0.154061	1.64399	0.100179	0.513128
1641	ENSG00000086696	HSD17B2	13.7892	-1.69061	0.704543	-2.39958	0.016414	0.280983
1642	ENSG00000086712	TXLNG	1076.72	0.254583	0.123154	2.06719	0.0387164	0.378314
1643	ENSG00000086717	PPEF1	2.74489	0.381689	0.794266	0.480555	0.630832	0.885229
1644	ENSG00000086730	LAT2	2383.79	-0.0289506	0.252142	-0.114819	0.908589	0.978382
1645	ENSG00000086758	HUWE1	23091.8	-0.38561	0.197476	-1.95269	0.0508565	0.408916
1646	ENSG00000086827	ZW10	879.988	0.0974257	0.146682	0.664195	0.506566	0.830668
1647	ENSG00000086848	ALG9	789.227	-0.114049	0.132022	-0.863866	0.387662	0.775953
1648	ENSG00000086967	MYBPC2	4.76786	0.114761	0.890327	0.128897	0.897439	0.974144
1649	ENSG00000086991	NOX4	6.79886	-0.926917	0.595155	-1.55744	0.119367	0.545132
1650	ENSG00000087008	ACOX3	855.675	0.273652	0.153401	1.7839	0.0744397	0.463427
1651	ENSG00000087053	MTMR2	2040.51	-0.00773754	0.215409	-0.0359202	0.971346	0.99362
1652	ENSG00000087074	PPP1R15A	33887.4	-0.282196	0.595258	-0.474074	0.635447	0.887281
1653	ENSG00000087076	HSD17B14	634.703	-0.292808	0.44637	-0.655975	0.51184	0.833094
1654	ENSG00000087077	TRIP6	694.738	0.361008	0.19264	1.874	0.0609303	0.434873
1655	ENSG00000087085	ACHE	18.4264	-0.770321	0.614575	-1.25342	0.210053	0.647109
1656	ENSG00000087086	FTL	745369	0.178796	0.318666	0.561075	0.574746	0.861757
1657	ENSG00000087087	SRRT	6177.28	-0.118437	0.221359	-0.535046	0.592618	0.869509
1658	ENSG00000087088	BAX	3867.06	-0.324823	0.196382	-1.65403	0.0981205	0.510243
1659	ENSG00000087095	NLK	730.528	0.0287379	0.1735	0.165636	0.868443	0.965826
1660	ENSG00000087111	PIGS	2590.83	-0.030107	0.126777	-0.237481	0.812284	0.947462
1661	ENSG00000087116	ADAMTS2	44.5466	0.243511	0.469511	0.518649	0.604006	0.874964
1662	ENSG00000087128	TMPRSS11E	2.40373	0.148012	0.593337	0.249457	0.803007	0.945013
1663	ENSG00000087152	ATXN7L3	3058.07	0.0877909	0.135166	0.649503	0.516013	0.834077
1664	ENSG00000087157	PGS1	1301.1	-0.00467844	0.133219	-0.0351185	0.971985	0.993751
1665	ENSG00000087191	PSMC5	5971	-0.0641676	0.146699	-0.43741	0.661814	0.896459
1666	ENSG00000087206	UIMC1	1333.51	-0.321363	0.23997	-1.33918	0.180513	0.61744
1667	ENSG00000087237	CETP	5.82391	0.176239	0.463976	0.379846	0.70406	0.911189
1668	ENSG00000087245	MMP2	819.915	-0.516914	0.67276	-0.768347	0.442281	0.801648
1669	ENSG00000087250	MT3	0.731236	0.826844	1.25694	0.657822	0.510653	NA
1670	ENSG00000087253	LPCAT2	3624.44	0.435018	0.510553	0.852052	0.394185	0.779072
1671	ENSG00000087258	GNAO1	203.834	-0.124739	0.517824	-0.240891	0.80964	0.946855
1672	ENSG00000087263	OGFOD1	1818.74	0.160658	0.160937	0.998263	0.318152	0.733966
1673	ENSG00000087266	SH3BP2	7339.67	0.342757	0.23866	1.43617	0.150953	0.584839
1674	ENSG00000087269	NOP14	2992.85	0.122865	0.126726	0.969539	0.332276	0.74076
1675	ENSG00000087274	ADD1	8874.34	-0.264519	0.119603	-2.21165	0.0269908	0.336767
1676	ENSG00000087299	L2HGDH	492.855	-0.200639	0.138987	-1.44358	0.148857	0.583397
1677	ENSG00000087301	TXNDC16	370.433	-0.188292	0.192687	-0.977189	0.328476	0.738627
1678	ENSG00000087302	RTRAF	4066.46	-0.240589	0.161098	-1.49343	0.135325	0.566863
1679	ENSG00000087303	NID2	68.7417	-1.2343	0.490769	-2.51504	0.0119018	0.255022
1680	ENSG00000087338	GMCL1	1198.22	-0.316354	0.181024	-1.74758	0.0805362	0.474789
1681	ENSG00000087365	SF3B2	12113.1	-0.226661	0.155109	-1.4613	0.143933	0.577352
1682	ENSG00000087448	KLHL42	920.894	-0.059229	0.171687	-0.344983	0.730107	0.921532
1683	ENSG00000087460	GNAS	31474.2	-0.0968746	0.108794	-0.890439	0.37323	0.767194
1684	ENSG00000087470	DNM1L	3356.2	0.13055	0.184755	0.706613	0.479807	0.819524
1685	ENSG00000087494	PTHLH	0.408883	0.689036	1.71704	0.401292	0.688205	NA
1686	ENSG00000087495	PHACTR3	1.88704	0.108344	0.510752	0.212126	0.832009	NA
1687	ENSG00000087502	ERGIC2	1715.37	0.0272982	0.163733	0.166724	0.867587	0.96563
1688	ENSG00000087510	TFAP2C	14.4352	-0.877019	0.505642	-1.73447	0.0828355	0.478933
1689	ENSG00000087586	AURKA	1170.65	-0.654429	0.239545	-2.73196	0.00629579	0.218307
1690	ENSG00000087589	CASS4	2612	0.910709	0.344155	2.64622	0.0081398	0.230022
1691	ENSG00000087842	PIR	787.303	0.201346	0.269916	0.745955	0.455695	0.807573
1692	ENSG00000087884	AAMDC	154.356	-0.410306	0.189555	-2.16457	0.0304207	0.348779
1693	ENSG00000087903	RFX2	445.637	0.203612	0.194834	1.04505	0.295999	0.715893
1694	ENSG00000087995	METTL2A	795.219	0.0424269	0.128846	0.329285	0.74194	0.926266
1695	ENSG00000088002	SULT2B1	4.34128	-0.726761	0.600697	-1.20986	0.226332	0.662671
1696	ENSG00000088035	ALG6	451.248	0.0250615	0.181096	0.138388	0.889934	0.97083
1697	ENSG00000088038	CNOT3	2686.2	-0.0171403	0.149557	-0.114607	0.908757	0.978393
1698	ENSG00000088053	GP6	17.1247	-0.185265	0.285023	-0.649999	0.515693	0.834077
1699	ENSG00000088179	PTPN4	2149.34	-0.51524	0.2963	-1.73891	0.0820498	0.477138
1700	ENSG00000088205	DDX18	2829.26	0.093335	0.209992	0.444469	0.656703	0.894418
1701	ENSG00000088247	KHSRP	7346.98	0.100831	0.131825	0.764887	0.444339	0.802936
1702	ENSG00000088256	GNA11	586.099	0.392606	0.333235	1.17817	0.23873	0.671736
1703	ENSG00000088280	ASAP3	21.3025	0.751979	0.537675	1.39858	0.16194	0.598262
1704	ENSG00000088298	EDEM2	2266.59	-0.289289	0.195882	-1.47686	0.139714	0.57229
1705	ENSG00000088305	DNMT3B	140.011	-0.872783	0.257451	-3.3901	0.000698679	0.0842668
1706	ENSG00000088325	TPX2	2399.08	-1.0945	0.409216	-2.67464	0.00748104	0.227216
1707	ENSG00000088340	FER1L4	44.3629	-0.00835765	0.494486	-0.0169017	0.986515	0.996922
1708	ENSG00000088356	PDRG1	517.671	-0.198128	0.155338	-1.27547	0.202145	0.639314
1709	ENSG00000088367	EPB41L1	5035.5	-0.0450958	0.599903	-0.0751719	0.940078	0.984603
1710	ENSG00000088386	SLC15A1	22.6997	0.20109	0.339479	0.59235	0.553616	0.851996
1711	ENSG00000088387	DOCK9	1656.27	-0.313931	0.392125	-0.800591	0.423369	0.793122
1712	ENSG00000088448	ANKRD10	2169.19	0.0743675	0.130838	0.568395	0.569767	0.859556
1713	ENSG00000088451	TGDS	592.795	-0.0819604	0.128537	-0.637638	0.523709	0.838785
1714	ENSG00000088538	DOCK3	2039.08	0.662288	0.473381	1.39906	0.161795	0.598262
1715	ENSG00000088543	C3orf18	342.791	-0.207273	0.149432	-1.38707	0.16542	0.601672
1716	ENSG00000088682	COQ9	1586.3	0.24937	0.1946	1.28145	0.200037	0.636859
1717	ENSG00000088726	TMEM40	28.3361	0.481252	0.516277	0.932158	0.351255	0.753517
1718	ENSG00000088727	KIF9	74.6971	0.0674957	0.243109	0.277635	0.781292	0.938142
1719	ENSG00000088756	ARHGAP28	13.9408	0.391333	0.300806	1.30095	0.193276	0.631557
1720	ENSG00000088766	CRLS1	620.568	0.189321	0.188664	1.00348	0.315629	0.731798
1721	ENSG00000088808	PPP1R13B	671.01	0.237431	0.184797	1.28482	0.198854	0.635532
1722	ENSG00000088812	ATRN	2967.46	0.20125	0.363146	0.554186	0.579452	0.864041
1723	ENSG00000088826	SMOX	1234.21	0.357827	0.269893	1.32581	0.184903	0.621027
1724	ENSG00000088827	SIGLEC1	2561.64	-0.160542	0.683062	-0.235032	0.814184	0.948349
1725	ENSG00000088832	FKBP1A	14768.7	0.518893	0.333305	1.55681	0.119516	0.545132
1726	ENSG00000088833	NSFL1C	2933.12	0.1494	0.138171	1.08127	0.279577	0.705086
1727	ENSG00000088836	SLC4A11	226.66	0.213416	0.256709	0.831354	0.405774	0.784686
1728	ENSG00000088854	C20orf194	1245.65	0.000354236	0.319076	0.00111019	0.999114	0.999961
1729	ENSG00000088876	ZNF343	434.996	0.143177	0.186682	0.766956	0.443108	0.802178
1730	ENSG00000088881	EBF4	87.6013	0.583355	0.520805	1.1201	0.26267	0.691899
1731	ENSG00000088882	CPXM1	105.338	-1.61442	0.623061	-2.5911	0.00956688	0.235892
1732	ENSG00000088888	MAVS	5685.31	-0.150329	0.132894	-1.1312	0.257973	0.689157
1733	ENSG00000088899	LZTS3	392.363	0.415512	0.451401	0.920496	0.357314	0.757625
1734	ENSG00000088926	F11	1.50153	-0.0537336	0.98681	-0.0544518	0.956575	NA
1735	ENSG00000088930	XRN2	4894.68	0.0874913	0.204256	0.428342	0.668402	0.899094
1736	ENSG00000088970	KIZ	1052.93	-0.456534	0.383033	-1.19189	0.233304	0.668046
1737	ENSG00000088986	DYNLL1	4123.01	0.0943406	0.147487	0.639653	0.522399	0.838031
1738	ENSG00000088992	TESC	404.038	-1.09046	0.382708	-2.84934	0.00438101	0.184189
1739	ENSG00000089006	SNX5	5817.55	-0.142475	0.119638	-1.19089	0.233696	0.668046
1740	ENSG00000089009	RPL6	24305	-0.155371	0.151052	-1.02859	0.30367	0.722117
1741	ENSG00000089012	SIRPG	253.739	0.535735	0.301393	1.77753	0.0754808	0.465614
1742	ENSG00000089022	MAPKAPK5	2198.54	0.285601	0.148001	1.92972	0.0536415	0.415521
1743	ENSG00000089041	P2RX7	2789.62	0.0620824	0.224239	0.276858	0.781889	0.938142
1744	ENSG00000089048	ESF1	1420.58	0.247984	0.170049	1.45831	0.144755	0.578785
1745	ENSG00000089050	RBBP9	651.546	-0.0861462	0.124702	-0.690816	0.489681	0.82488
1746	ENSG00000089053	ANAPC5	3974.98	-0.1703	0.0972934	-1.75037	0.0800543	0.474064
1747	ENSG00000089057	SLC23A2	6990.3	0.545754	0.323793	1.6855	0.0918912	0.497299
1748	ENSG00000089060	SLC8B1	3983.17	0.51914	0.269736	1.92462	0.0542764	0.416686
1749	ENSG00000089063	TMEM230	3760.54	0.177897	0.200643	0.886636	0.375275	0.768809
1750	ENSG00000089091	DZANK1	126.82	-0.353603	0.187546	-1.88542	0.0593737	0.431535
1751	ENSG00000089094	KDM2B	3573.96	0.0844353	0.135628	0.62255	0.53358	0.844229
1752	ENSG00000089101	CFAP61	13.7046	0.700939	0.691946	1.013	0.311062	0.728696
1753	ENSG00000089116	LHX5	0.821098	-0.678189	1.53151	-0.442822	0.657894	NA
1754	ENSG00000089123	TASP1	216.546	0.142465	0.182322	0.781391	0.434572	0.797632
1755	ENSG00000089127	OAS1	2983.81	-0.0624737	0.37691	-0.165752	0.868352	0.965826
1756	ENSG00000089154	GCN1	8433.65	0.184314	0.177461	1.03862	0.298982	0.718143
1757	ENSG00000089157	RPLP0	31279.2	-0.0561442	0.137855	-0.40727	0.683809	0.903104
1758	ENSG00000089159	PXN	6793.72	0.359185	0.197105	1.8223	0.068409	0.453053
1759	ENSG00000089163	SIRT4	39.9039	-0.317738	0.44715	-0.710586	0.477341	0.818327
1760	ENSG00000089169	RPH3A	1.24305	0.0670584	0.695238	0.0964538	0.92316	NA
1761	ENSG00000089177	KIF16B	1063.03	-0.0878113	0.282312	-0.311043	0.755768	0.930622
1762	ENSG00000089195	TRMT6	831.166	0.226257	0.11412	1.98262	0.0474094	0.398064
1763	ENSG00000089199	CHGB	10.6368	-0.813323	0.500114	-1.62628	0.103891	0.518436
1764	ENSG00000089220	PEBP1	4497.63	-0.0595264	0.202876	-0.293413	0.769206	0.934547
1765	ENSG00000089225	TBX5	0.00712791	-0.222852	2.98078	-0.0747629	0.940403	NA
1766	ENSG00000089234	BRAP	1408.77	0.00447669	0.078501	0.0570272	0.954524	0.988617
1767	ENSG00000089248	ERP29	8072.52	-0.268418	0.13521	-1.98519	0.0471233	0.39794
1768	ENSG00000089250	NOS1	8.3446	1.48395	0.644983	2.30077	0.0214049	0.307653
1769	ENSG00000089280	FUS	16526.5	0.115283	0.119591	0.963974	0.335059	0.743205
1770	ENSG00000089289	IGBP1	2390.53	-0.0638949	0.168642	-0.378879	0.704778	0.911447
1771	ENSG00000089327	FXYD5	10805.2	-0.380995	0.129778	-2.93574	0.00332758	0.168855
1772	ENSG00000089335	ZNF302	778.888	-0.101444	0.143093	-0.708942	0.478361	0.818916
1773	ENSG00000089351	GRAMD1A	2858.03	-0.149135	0.155472	-0.959238	0.337439	0.745739
1774	ENSG00000089356	FXYD3	4.85637	-0.300135	1.10241	-0.272253	0.785427	0.938673
1775	ENSG00000089472	HEPH	4.99466	-0.264156	0.693975	-0.380641	0.703469	0.911189
1776	ENSG00000089486	CDIP1	1195.8	-0.106821	0.112927	-0.945929	0.344185	0.748578
1777	ENSG00000089505	CMTM1	94.8167	-0.427366	0.241858	-1.76701	0.0772266	0.469153
1778	ENSG00000089558	KCNH4	43.8556	-0.0020277	0.335739	-0.00603953	0.995181	0.999183
1779	ENSG00000089597	GANAB	13218.9	0.025817	0.169423	0.152382	0.878886	0.968294
1780	ENSG00000089639	GMIP	5357.2	0.0120891	0.172386	0.070128	0.944092	0.985582
1781	ENSG00000089682	RBM41	655.06	-0.0121103	0.175632	-0.0689528	0.945027	0.985899
1782	ENSG00000089685	BIRC5	1031.15	-0.885328	0.443379	-1.99677	0.0458497	0.394855
1783	ENSG00000089692	LAG3	2842.52	-1.76321	0.633865	-2.78168	0.00540784	0.206125
1784	ENSG00000089693	MLF2	5253.35	0.0754726	0.103645	0.728187	0.466499	0.813333
1785	ENSG00000089723	OTUB2	445.658	0.276048	0.388286	0.71094	0.477121	0.818281
1786	ENSG00000089737	DDX24	7853.02	-0.0301809	0.124956	-0.241532	0.809143	0.946781
1787	ENSG00000089775	ZBTB25	1972.24	0.110599	0.252043	0.43881	0.660799	0.895825
1788	ENSG00000089818	NECAP1	1989.5	0.262619	0.155512	1.68874	0.0912692	0.496268
1789	ENSG00000089820	ARHGAP4	5967.55	-0.264875	0.195397	-1.35557	0.175235	0.6123
1790	ENSG00000089847	ANKRD24	157.019	0.303008	0.420132	0.721221	0.470774	0.815546
1791	ENSG00000089876	DHX32	793.249	-0.113033	0.227341	-0.497196	0.619051	0.881762
1792	ENSG00000089902	RCOR1	3038.72	0.345999	0.268875	1.28684	0.19815	0.635532
1793	ENSG00000089916	GPATCH2L	4057.01	0.0723935	0.116924	0.619152	0.535817	0.844731
1794	ENSG00000090006	LTBP4	1666.23	-0.565249	0.351658	-1.60738	0.107971	0.524667
1795	ENSG00000090013	BLVRB	2571.03	0.0822835	0.289716	0.284014	0.776399	0.936822
1796	ENSG00000090020	SLC9A1	2836.61	-0.162149	0.194827	-0.832271	0.405256	0.784261
1797	ENSG00000090054	SPTLC1	3287.9	0.149373	0.178132	0.838549	0.401722	0.782263
1798	ENSG00000090060	PAPOLA	9480.21	0.0674895	0.0985367	0.684917	0.493396	0.826494
1799	ENSG00000090061	CCNK	3516.2	0.154404	0.102722	1.50313	0.132807	0.564367
1800	ENSG00000090097	PCBP4	379.603	-0.352571	0.283552	-1.24341	0.213718	0.650931
1801	ENSG00000090104	RGS1	6183.9	0.44518	0.450292	0.988648	0.322835	0.735559
1802	ENSG00000090238	YPEL3	4484.72	-0.0278134	0.45664	-0.0609088	0.951432	0.988141
1803	ENSG00000090263	MRPS33	631.163	-0.0270573	0.168053	-0.161005	0.87209	0.966631
1804	ENSG00000090266	NDUFB2	963.11	-0.102047	0.195181	-0.522833	0.60109	0.873455
1805	ENSG00000090273	NUDC	5138.04	-0.0605363	0.218637	-0.27688	0.781872	0.938142
1806	ENSG00000090316	MAEA	2765.9	-0.141785	0.092508	-1.53268	0.125354	0.55268
1807	ENSG00000090339	ICAM1	8762.38	0.0777997	0.261763	0.297214	0.766303	0.933694
1808	ENSG00000090372	STRN4	3651.82	0.0882983	0.107106	0.824401	0.409712	0.787139
1809	ENSG00000090376	IRAK3	1619.18	0.438473	0.413229	1.06109	0.288649	0.711182
1810	ENSG00000090382	LYZ	110502	0.626325	0.494734	1.26598	0.205519	0.64282
1811	ENSG00000090432	MUL1	1454.31	0.232472	0.242646	0.958069	0.338028	0.745884
1812	ENSG00000090447	TFAP4	346.715	-0.0789408	0.204604	-0.385822	0.699629	0.909773
1813	ENSG00000090470	PDCD7	1130.16	-0.292387	0.0992443	-2.94613	0.00321777	0.165785
1814	ENSG00000090487	SPG21	4200.29	0.305174	0.253147	1.20552	0.228002	0.663824
1815	ENSG00000090520	DNAJB11	4001.39	-0.0401126	0.174071	-0.230438	0.817751	0.949404
1816	ENSG00000090530	P3H2	12.1608	0.473391	0.513016	0.92276	0.356132	0.756826
1817	ENSG00000090534	THPO	5.1502	3.10195	0.753308	4.11777	3.82554e-05	0.0173652
1818	ENSG00000090539	CHRD	247.244	2.33207	0.561628	4.15234	3.29091e-05	0.0171169
1819	ENSG00000090554	FLT3LG	774.149	-0.710229	0.383878	-1.85014	0.0642929	0.44149
1820	ENSG00000090565	RAB11FIP3	1150.28	-0.285422	0.199221	-1.43269	0.151947	0.58596
1821	ENSG00000090581	GNPTG	2635.79	0.186434	0.204317	0.912475	0.361519	0.760259
1822	ENSG00000090612	ZNF268	1045.64	0.0686312	0.217695	0.315263	0.752562	0.929353
1823	ENSG00000090615	GOLGA3	7095.23	0.169264	0.17647	0.95917	0.337473	0.745739
1824	ENSG00000090621	PABPC4	6945.06	0.225196	0.185095	1.21665	0.223737	0.660653
1825	ENSG00000090659	CD209	2425.82	0.774417	0.560689	1.38119	0.167221	0.603539
1826	ENSG00000090661	CERS4	810.844	-0.620411	0.338437	-1.83317	0.0667778	0.447963
1827	ENSG00000090674	MCOLN1	2437.99	-0.0428985	0.236467	-0.181414	0.856042	0.961661
1828	ENSG00000090686	USP48	3552.61	-0.242921	0.08039	-3.02178	0.00251293	0.150479
1829	ENSG00000090776	EFNB1	378.652	0.0442094	0.199127	0.222015	0.824302	0.951537
1830	ENSG00000090857	PDPR	4476.36	0.130908	0.207632	0.63048	0.528381	0.841478
1831	ENSG00000090861	AARS1	9858.11	0.0315614	0.260977	0.120936	0.903742	0.976587
1832	ENSG00000090863	GLG1	10304.9	0.0620515	0.201895	0.307346	0.75858	0.931427
1833	ENSG00000090889	KIF4A	640.96	-1.1257	0.424819	-2.64982	0.00805337	0.230022
1834	ENSG00000090905	TNRC6A	3308.44	-0.00554532	0.160225	-0.0346097	0.972391	0.993751
1835	ENSG00000090924	PLEKHG2	2319.6	-0.300759	0.257259	-1.16909	0.242369	0.675278
1836	ENSG00000090932	DLL3	3.25266	-0.246429	0.894181	-0.275592	0.782862	0.938487
1837	ENSG00000090971	NAT14	67.0218	-0.277752	0.330901	-0.839381	0.401255	0.781896
1838	ENSG00000090975	PITPNM2	585.526	0.310246	0.220583	1.40648	0.15958	0.595439
1839	ENSG00000090989	EXOC1	2370.25	0.160607	0.164469	0.97652	0.328807	0.738745
1840	ENSG00000091009	RBM27	2213.02	0.081927	0.161716	0.50661	0.612429	0.87873
1841	ENSG00000091010	POU4F3	2.92604	0.485266	0.599117	0.809967	0.417959	0.790131
1842	ENSG00000091039	OSBPL8	8962.62	0.345109	0.317493	1.08698	0.277045	0.703633
1843	ENSG00000091073	DTX2	1760.84	0.218512	0.17023	1.28362	0.199274	0.635973
1844	ENSG00000091106	NLRC4	1714.78	0.694236	0.493716	1.40615	0.159681	0.59551
1845	ENSG00000091127	PUS7	379.272	0.417574	0.244318	1.70914	0.087425	0.48818
1846	ENSG00000091128	LAMB4	17.4946	0.304049	0.329715	0.922158	0.356446	0.757364
1847	ENSG00000091129	NRCAM	64.5691	0.389195	0.472162	0.824284	0.409778	0.787164
1848	ENSG00000091136	LAMB1	72.0049	-0.993505	0.557038	-1.78355	0.0744967	0.463465
1849	ENSG00000091137	SLC26A4	45.5613	-0.386929	0.356653	-1.08489	0.277971	0.704151
1850	ENSG00000091140	DLD	4774.26	0.139372	0.2902	0.480263	0.63104	0.885229
1851	ENSG00000091157	WDR7	3200.15	0.0607541	0.296547	0.204872	0.837672	0.955034
1852	ENSG00000091164	TXNL1	3952.05	0.104712	0.134361	0.779335	0.435782	0.798396
1853	ENSG00000091181	IL5RA	50.8388	-1.02911	0.663855	-1.55021	0.121092	0.546884
1854	ENSG00000091262	ABCC6	25.2905	0.968102	0.51858	1.86683	0.0619251	0.436853
1855	ENSG00000091317	CMTM6	11454.1	0.226466	0.232659	0.973379	0.330365	0.739854
1856	ENSG00000091409	ITGA6	4810.2	-0.27667	0.533234	-0.518852	0.603864	0.874887
1857	ENSG00000091428	RAPGEF4	10.0368	1.1724	0.642514	1.8247	0.0680462	0.451655
1858	ENSG00000091436	MAP3K20	1696.11	0.011931	0.164042	0.0727313	0.94202	0.985067
1859	ENSG00000091483	NA	3382.32	0.175451	0.251781	0.696839	0.485903	0.822334
1860	ENSG00000091490	SEL1L3	5649.35	-0.0501553	0.211574	-0.237058	0.812611	0.947532
1861	ENSG00000091513	NA	360.402	-0.363451	0.467074	-0.778144	0.436484	0.798755
1862	ENSG00000091527	CDV3	16768.5	0.178628	0.145527	1.22745	0.219652	0.65651
1863	ENSG00000091536	MYO15A	54.1286	0.256369	0.414758	0.618118	0.536497	0.845071
1864	ENSG00000091542	ALKBH5	4185.76	0.0752388	0.0999646	0.752655	0.451657	0.805837
1865	ENSG00000091583	APOH	1.13465	3.38158	2.16228	1.56389	0.117843	NA
1866	ENSG00000091592	NLRP1	6103.28	0.0793229	0.324632	0.244347	0.806962	0.946224
1867	ENSG00000091622	PITPNM3	56.7215	-0.220395	0.361909	-0.60898	0.542538	0.847722
1868	ENSG00000091640	SPAG7	2352.1	0.0366636	0.107008	0.342627	0.731879	0.922321
1869	ENSG00000091651	ORC6	917.367	-0.520653	0.234295	-2.22221	0.0262692	0.333906
1870	ENSG00000091656	ZFHX4	2.76367	-1.31086	0.874698	-1.49865	0.133965	0.565492
1871	ENSG00000091732	ZC3HC1	507.71	-0.020518	0.12573	-0.163191	0.870368	0.96657
1872	ENSG00000091831	ESR1	265.456	0.546497	0.407238	1.34196	0.179609	0.617244
1873	ENSG00000091844	RGS17	26.3321	-0.335397	0.411067	-0.815918	0.414547	0.789417
1874	ENSG00000091879	ANGPT2	13.5184	-0.830906	0.554118	-1.49951	0.133741	0.565464
1875	ENSG00000091947	TMEM101	949.737	-0.0465166	0.0885759	-0.52516	0.599472	0.872524
1876	ENSG00000091972	CD200	82.6523	0.74255	0.445077	1.66836	0.0952435	0.503889
1877	ENSG00000091986	CCDC80	46.3019	-0.849697	0.497741	-1.70711	0.0878019	0.489597
1878	ENSG00000092009	CMA1	0.544138	-0.196608	1.13236	-0.173627	0.862159	NA
1879	ENSG00000092010	PSME1	5715.2	-0.197947	0.164302	-1.20477	0.228291	0.664431
1880	ENSG00000092020	PPP2R3C	1352.97	0.00754474	0.0955034	0.0789997	0.937033	0.984004
1881	ENSG00000092036	HAUS4	1398.75	-0.0922001	0.141925	-0.649638	0.515926	0.834077
1882	ENSG00000092051	JPH4	27.127	-0.591353	0.609778	-0.969784	0.332154	0.74076
1883	ENSG00000092054	MYH7	2.43909	-1.3306	1.26587	-1.05113	0.293197	0.713977
1884	ENSG00000092067	CEBPE	28.4568	0.551848	0.468832	1.17707	0.239168	0.672101
1885	ENSG00000092068	SLC7A8	10413.1	0.962589	0.498961	1.92919	0.0537077	0.415521
1886	ENSG00000092094	OSGEP	1589.11	-0.192457	0.1707	-1.12746	0.259547	0.690374
1887	ENSG00000092096	SLC22A17	79.0494	0.156152	0.418944	0.372727	0.709352	0.913527
1888	ENSG00000092098	RNF31	2326.91	-0.219939	0.149995	-1.46631	0.142564	0.575838
1889	ENSG00000092108	SCFD1	2754.59	-0.00993801	0.165971	-0.059878	0.952253	0.988447
1890	ENSG00000092140	G2E3	991.747	0.0321943	0.199084	0.161712	0.871533	0.966631
1891	ENSG00000092148	HECTD1	9009.31	0.247059	0.19146	1.29039	0.196914	0.634833
1892	ENSG00000092199	HNRNPC	23519	0.0146113	0.12281	0.118975	0.905295	0.977192
1893	ENSG00000092200	RPGRIP1	13.6081	-0.878868	0.673421	-1.30508	0.191866	0.629783
1894	ENSG00000092201	SUPT16H	6855.33	-0.0929082	0.103581	-0.896958	0.369741	0.764542
1895	ENSG00000092203	TOX4	3450.85	-0.174646	0.139975	-1.24769	0.212144	0.649786
1896	ENSG00000092208	GEMIN2	225.779	-0.392023	0.272683	-1.43765	0.150533	0.584258
1897	ENSG00000092295	TGM1	111.394	0.196789	0.409813	0.480192	0.631091	0.885229
1898	ENSG00000092330	TINF2	2623.21	-0.0950193	0.111975	-0.848579	0.396116	0.779958
1899	ENSG00000092345	DAZL	2.56599	1.24817	0.915768	1.36297	0.172891	0.610314
1900	ENSG00000092421	SEMA6A	4.79246	-0.965856	0.806583	-1.19747	0.231125	0.666411
1901	ENSG00000092439	TRPM7	5506.74	0.0143533	0.164796	0.0870975	0.930594	0.982185
1902	ENSG00000092445	TYRO3	118.856	-0.0871665	0.262394	-0.332197	0.739741	0.925547
1903	ENSG00000092470	WDR76	983.764	-0.836646	0.309447	-2.70368	0.00685754	0.222056
1904	ENSG00000092529	CAPN3	659.249	0.458121	0.247618	1.85011	0.0642978	0.44149
1905	ENSG00000092531	SNAP23	4731.46	0.177387	0.251018	0.706669	0.479772	0.819524
1906	ENSG00000092607	TBX15	0.72473	-1.17534	1.41633	-0.829843	0.406628	NA
1907	ENSG00000092621	PHGDH	1168.33	-0.88867	0.409672	-2.16923	0.0300656	0.347928
1908	ENSG00000092758	COL9A3	21.4682	1.06615	0.579319	1.84036	0.0657157	0.445953
1909	ENSG00000092820	EZR	8514.99	0.00550125	0.108631	0.0506415	0.959611	0.989816
1910	ENSG00000092841	MYL6	25943.1	0.0118566	0.194654	0.0609114	0.95143	0.988141
1911	ENSG00000092847	AGO1	5372.43	0.212632	0.30845	0.689357	0.490598	0.825642
1912	ENSG00000092850	TEKT2	2.68898	-0.778402	0.855507	-0.909872	0.36289	0.760717
1913	ENSG00000092853	CLSPN	1460.71	-1.57177	0.373045	-4.21336	2.51603e-05	0.0146701
1914	ENSG00000092871	RFFL	2769.09	-0.29164	0.203915	-1.4302	0.152659	0.587528
1915	ENSG00000092929	UNC13D	6268.41	-0.330918	0.113429	-2.91741	0.00352948	0.171572
1916	ENSG00000092931	MFSD11	1102.76	0.0797334	0.158966	0.501575	0.615966	0.880722
1917	ENSG00000092964	DPYSL2	5537.08	0.360964	0.312181	1.15627	0.247572	0.680416
1918	ENSG00000092969	TGFB2	27.3237	-0.391829	0.661203	-0.5926	0.553449	0.851996
1919	ENSG00000092978	GPATCH2	481.457	-0.0847881	0.0973855	-0.870644	0.383949	0.773474
1920	ENSG00000093000	NUP50	4504.45	-0.012401	0.127878	-0.0969754	0.922746	0.980616
1921	ENSG00000093009	CDC45	704.952	-1.24945	0.490064	-2.54955	0.0107861	0.24525
1922	ENSG00000093010	COMT	3419.44	0.0732807	0.279904	0.261807	0.79347	0.942022
1923	ENSG00000093072	ADA2	17713.3	-0.321909	0.515963	-0.623899	0.532694	0.843808
1924	ENSG00000093100	AC016026.1	282.735	-0.160976	0.584958	-0.275193	0.783168	0.9385
1925	ENSG00000093134	VNN3	27.4998	-1.3964	0.679017	-2.0565	0.0397344	0.381395
1926	ENSG00000093144	ECHDC1	2270.35	0.18892	0.146004	1.29394	0.195687	0.633415
1927	ENSG00000093167	LRRFIP2	2460.95	-0.0365171	0.148068	-0.246625	0.805199	0.94596
1928	ENSG00000093183	SEC22C	2576.54	-0.0318491	0.12427	-0.25629	0.797727	0.94342
1929	ENSG00000093217	XYLB	204.863	0.243781	0.372476	0.654488	0.512797	0.83313
1930	ENSG00000094631	HDAC6	3167.31	-0.0233868	0.183975	-0.127119	0.898846	0.9745
1931	ENSG00000094661	OR1I1	39.9699	-0.408209	0.347621	-1.17429	0.240277	0.673196
1932	ENSG00000094755	GABRP	17.6124	0.130171	0.290964	0.447379	0.654602	0.893762
1933	ENSG00000094804	CDC6	684.945	-0.965701	0.369928	-2.61051	0.00904062	0.233715
1934	ENSG00000094841	UPRT	718.168	0.0793059	0.133541	0.593869	0.5526	0.851402
1935	ENSG00000094880	CDC23	1483.05	0.0548083	0.142253	0.385287	0.700025	0.909967
1936	ENSG00000094914	AAAS	1697.2	0.0838102	0.0968329	0.865514	0.386757	0.775429
1937	ENSG00000094916	CBX5	5443.92	-0.385873	0.153098	-2.52044	0.0117209	0.253793
1938	ENSG00000094975	SUCO	1430.69	-0.131149	0.123053	-1.0658	0.286516	0.70985
1939	ENSG00000095002	MSH2	1059.7	-0.0443243	0.188068	-0.235682	0.813679	0.948115
1940	ENSG00000095015	MAP3K1	2634.77	-0.0660118	0.216696	-0.304628	0.760649	0.931948
1941	ENSG00000095059	DHPS	1964.18	0.189878	0.168468	1.12709	0.259704	0.690444
1942	ENSG00000095066	HOOK2	921.842	-0.300096	0.365575	-0.820888	0.41171	0.78799
1943	ENSG00000095139	ARCN1	9233.59	0.194361	0.12794	1.51916	0.128723	0.557543
1944	ENSG00000095203	EPB41L4B	11.3498	-0.428116	0.558145	-0.767034	0.443062	0.802178
1945	ENSG00000095209	TMEM38B	1923.67	0.561293	0.341281	1.64466	0.100039	0.513128
1946	ENSG00000095261	PSMD5	2009.34	-0.0841514	0.117509	-0.716128	0.473912	0.816407
1947	ENSG00000095303	PTGS1	1997.66	0.26932	0.409363	0.657901	0.510602	0.832366
1948	ENSG00000095319	NUP188	6054.49	-0.0590264	0.225388	-0.261888	0.793408	0.942005
1949	ENSG00000095321	CRAT	1425.81	0.0126457	0.131541	0.0961352	0.923413	0.980685
1950	ENSG00000095370	SH2D3C	2623.34	-0.433989	0.264079	-1.64341	0.100299	0.513128
1951	ENSG00000095380	NANS	3314.92	0.233243	0.210009	1.11064	0.266725	0.695593
1952	ENSG00000095383	TBC1D2	5250.68	0.230535	0.382399	0.602864	0.546599	0.849142
1953	ENSG00000095397	WHRN	1071.24	0.0198329	0.466046	0.0425558	0.966056	0.991676
1954	ENSG00000095464	PDE6C	0.565673	-0.791073	1.8854	-0.419577	0.674794	NA
1955	ENSG00000095485	CWF19L1	1688.19	-0.0823727	0.105462	-0.781063	0.434765	0.797712
1956	ENSG00000095539	SEMA4G	21.8519	0.638307	0.500038	1.27652	0.201772	0.638705
1957	ENSG00000095564	BTAF1	4363.48	0.0802129	0.122616	0.654177	0.512998	0.833178
1958	ENSG00000095574	IKZF5	1042.82	0.241466	0.135094	1.78739	0.0738748	0.461901
1959	ENSG00000095585	BLNK	526.017	0.0619738	0.496595	0.124798	0.900684	0.975264
1960	ENSG00000095587	TLL2	21.239	-0.703823	0.402188	-1.74999	0.0801209	0.474064
1961	ENSG00000095596	CYP26A1	1.01241	-0.851776	1.70303	-0.500153	0.616967	NA
1962	ENSG00000095627	TDRD1	5.18297	-1.23642	0.810557	-1.52539	0.127162	0.555725
1963	ENSG00000095637	SORBS1	503.524	0.757664	0.479053	1.58159	0.113744	0.533817
1964	ENSG00000095713	CRTAC1	0.154129	-0.75496	2.98018	-0.253327	0.800015	NA
1965	ENSG00000095739	BAMBI	96.7207	0.720645	0.594127	1.21295	0.225149	0.661873
1966	ENSG00000095752	IL11	23.5801	-0.454838	0.530643	-0.857145	0.391364	0.777621
1967	ENSG00000095777	MYO3A	1.02591	1.56017	2.2066	0.707048	0.479537	NA
1968	ENSG00000095787	WAC	8612.84	-0.119368	0.135367	-0.881811	0.377879	0.770597
1969	ENSG00000095794	CREM	2612.43	-0.880289	0.453528	-1.94098	0.0522606	0.412892
1970	ENSG00000095906	NUBP2	997.101	-0.224182	0.151284	-1.48186	0.138378	0.570091
1971	ENSG00000095917	TPSD1	20.9495	0.0555364	0.932914	0.0595301	0.95253	0.98848
1972	ENSG00000095932	SMIM24	15.4146	-0.671862	0.436331	-1.5398	0.123609	0.550164
1973	ENSG00000095951	HIVEP1	2297.02	-0.144272	0.145596	-0.990905	0.321732	0.734613
1974	ENSG00000095970	TREM2	3504.74	-0.123829	0.626667	-0.1976	0.843358	0.957619
1975	ENSG00000096006	CRISP3	4.52048	-0.0541558	0.318385	-0.170095	0.864935	0.964835
1976	ENSG00000096060	FKBP5	6540.43	0.172388	0.282279	0.6107	0.541398	0.847687
1977	ENSG00000096063	SRPK1	2202.99	-0.184729	0.121454	-1.52099	0.128263	0.556813
1978	ENSG00000096070	BRPF3	2291.8	-0.113947	0.106577	-1.06915	0.285	0.709053
1979	ENSG00000096080	MRPS18A	792.318	-0.236526	0.159435	-1.48353	0.137934	0.569718
1980	ENSG00000096088	PGC	1.27141	2.29852	1.27328	1.80519	0.0710448	NA
1981	ENSG00000096092	TMEM14A	156.666	-0.17951	0.193556	-0.92743	0.353703	0.754794
1982	ENSG00000096093	EFHC1	151.515	-0.678086	0.304071	-2.23003	0.0257458	0.331859
1983	ENSG00000096264	NCR2	23.7292	-0.884858	0.54827	-1.61391	0.106547	0.523233
1984	ENSG00000096384	HSP90AB1	76482.5	0.207037	0.327737	0.631719	0.52757	0.841204
1985	ENSG00000096401	CDC5L	3344.4	0.0363385	0.0975244	0.37261	0.709439	0.913527
1986	ENSG00000096433	ITPR3	4228.87	-0.123618	0.269186	-0.459229	0.64607	0.890613
1987	ENSG00000096654	ZNF184	616.891	-0.161264	0.201177	-0.801602	0.422783	0.79279
1988	ENSG00000096696	DSP	1331.31	2.14661	0.546694	3.92654	8.6177e-05	0.0311811
1989	ENSG00000096717	SIRT1	1217.59	0.101487	0.129219	0.785389	0.432225	0.796922
1990	ENSG00000096746	HNRNPH3	8279.11	-0.0858457	0.158752	-0.540754	0.588677	0.868423
1991	ENSG00000096872	IFT74	337.958	0.15998	0.164896	0.970186	0.331954	0.74076
1992	ENSG00000096968	JAK2	2018.01	0.0942893	0.212489	0.443738	0.657232	0.894498
1993	ENSG00000096996	IL12RB1	1201.28	-0.889155	0.32146	-2.76599	0.00567494	0.211148
1994	ENSG00000097007	ABL1	2422.75	-0.080859	0.260328	-0.310604	0.756102	0.930622
1995	ENSG00000097021	ACOT7	2097.13	0.211566	0.269687	0.784488	0.432754	0.797162
1996	ENSG00000097033	SH3GLB1	6826.25	0.252021	0.154146	1.63495	0.102059	0.516106
1997	ENSG00000097046	CDC7	541.105	-0.393914	0.332368	-1.18517	0.23595	0.670085
1998	ENSG00000097096	SYDE2	44.0776	0.117708	0.276023	0.426442	0.669786	0.899423
[truncated: 31,469 more rows]

## Sheet: Table S4 GSEA results
Table S4. Gene set enrichment analysis of PBL in the SARS-CoV-2-stimulated crosspresentation assay.
	ID	Description	setSize	enrichmentScore	NES	pvalue	p.adjust	qvalues	rank	leading_edge	core_enrichment
GSE24634_IL4_VS_CTRL_TREATED_NAIVE_CD4_TCELL_DAY7_DN	GSE24634_IL4_VS_CTRL_TREATED_NAIVE_CD4_TCELL_DAY7_DN	GSE24634_IL4_VS_CTRL_TREATED_NAIVE_CD4_TCELL_DAY7_DN	194	0.593786	3.12232	7.8e-05	0.000844536	0.000589738	5340	tags=52%, list=16%, signal=44%	DSP/INPP5F/DCHS1/CFB/CARMIL1/B9D2/VPS9D1/SYNC/HOMER1/RGCC/EGR2/IGFBP6/MYRF/ELOVL1/SCG5/RHBDF1/SAV1/ZPR1/TNFSF14/LRRC8B/CLN8/MIR22HG/MSRB1/SIRT7/GREM1/HDAC9/AHCYL1/HPD/TRIM9/ATF3/TXNRD1/IMPA2/GPC4/DUSP6/TSC22D1/CTTN/SLC6A12/ABHD5/C1S/SPAG9/LILRA2/SPATA31C2/IL1RN/DHRS9/S100A13/BACH1/NPC1/DAG1/TMEM43/PGD/SH3GLB1/SQSTM1/RALB/BCL2A1/STX4/CAMSAP2/TAGLN2/ADGRE2/CTNND2/APOO/TLR1/POLR3D/IL6R/SLC43A3/FTH1/…
GSE22886_NAIVE_CD8_TCELL_VS_DC_DN	GSE22886_NAIVE_CD8_TCELL_VS_DC_DN	GSE22886_NAIVE_CD8_TCELL_VS_DC_DN	200	0.583844	3.07787	8e-05	0.000844536	0.000589738	9732	tags=72%, list=29%, signal=52%	EGR2/FCER2/PLCG2/RCBTB2/CCDC47/SLC7A8/SLC16A6/STAC/CD83/TXN/LST1/ZNF804A/PGD/TUBB6/FTH1P5/TAX1BP3/ACO2/PLIN3/ANXA5/CTNNA1/ITPRID2/SLC31A2/FTH1/ARL8B/GLRX2/NPTN/RCOR1/KCTD5/PSEN1/GABARAP/VIM/SLC11A2/LAMTOR3/RREB1/VAMP3/SPG21/TIAM1/CREG1/CCR1/ATP6V1E1/LMO2/NFKBIE/SNX3/SPART/DSE/ATP6V1F/BCKDK/PGAM1/GSN/ZMIZ1/FLVCR2/PI4K2A/KLHL2/ATP6V0B/CRIM1/CSNK2A1/S100A11/CD63/RAB11FIP1/HHEX/ATP6V1B2/M6PR/CYP51A1/…
GSE24634_TEFF_VS_TCONV_DAY7_IN_CULTURE_DN	GSE24634_TEFF_VS_TCONV_DAY7_IN_CULTURE_DN	GSE24634_TEFF_VS_TCONV_DAY7_IN_CULTURE_DN	198	0.578848	3.04875	7.95e-05	0.000844536	0.000589738	8326	tags=63%, list=25%, signal=47%	CARMIL1/SYNC/HOMER1/RGCC/EGR2/IGFBP6/ELOVL1/RHBDF1/SAV1/LRRC8B/CLCN7/MSRB1/SPRY2/NRP1/SERPINE1/TSC22D2/MFSD12/GPC4/HMOX1/TSC22D1/AVPI1/SLC7A8/SLC8B1/ACTN1/C1S/CHST15/LILRA2/PTPRE/EDAR/PTPN12/FGR/CARD9/BACH1/ATP1A1/SLC27A3/PI4KA/GBAP1/GALNS/CYP1B1/BHLHE41/ITGAM/CDA/ADGRE2/TMEM41B/TLR1/PLXNB2/PYGL/KIF1B/ATP6AP1/LILRB2/NRIP3/CAND2/KIAA0513/LILRB4/CYP27B1/GABARAP/RREB1/ATP6V1H/VAMP3/BCAP31/SLC11A1/SP…
GSE9988_ANTI_TREM1_VS_VEHICLE_TREATED_MONOCYTES_UP	GSE9988_ANTI_TREM1_VS_VEHICLE_TREATED_MONOCYTES_UP	GSE9988_ANTI_TREM1_VS_VEHICLE_TREATED_MONOCYTES_UP	192	0.564666	2.96363	7.78e-05	0.000844536	0.000589738	6250	tags=55%, list=19%, signal=45%	MMP1/GEM/HOMER1/CDKN1A/EGR2/DUSP14/ADNP2/INSIG1/TNFSF14/LRRC8B/KBTBD8/MIR22HG/NSMAF/CRADD/CSF1/GPRC5A/MT1H/MT1G/SCML1/TXNRD1/ZFYVE16/DNAJB5/SRXN1/LONRF3/RASGEF1B/SPAG9/ZBTB21/ACSL3/ASPH/EDN1/ATP6V1G1/TXN/PTGS2/CCRL2/ADO/STARD8/NPC1/ABL2/TMEM38B/LINC01010/GFOD1/IARS1/EIF4E/ZSCAN5A/RAB1A/STX4/SMIM13/MAPK6/TUBB6/RABGEF1/MMP19/TRIB1/ANKRD28/SLC38A2/HSPA9/TMEM217/NAB2/PRKAG2/KLF10/FNIP2/MGAM/MAP4K3/NR…
GSE9988_ANTI_TREM1_VS_CTRL_TREATED_MONOCYTES_UP	GSE9988_ANTI_TREM1_VS_CTRL_TREATED_MONOCYTES_UP	GSE9988_ANTI_TREM1_VS_CTRL_TREATED_MONOCYTES_UP	196	0.550894	2.89893	7.89e-05	0.000844536	0.000589738	6250	tags=55%, list=19%, signal=45%	GEM/ADM/HOMER1/RGCC/CDKN1A/EGR2/PHLDA1/TNFSF14/LRRC8B/KBTBD8/MIR22HG/THBD/NSMAF/SPRY2/CRADD/MMP10/CSF1/GPRC5A/ATF3/TXNRD1/USP12/ZFYVE16/SRXN1/XIAP/LONRF3/RASGEF1B/SPAG9/ZBTB21/ACSL3/PTPRE/ASPH/EDN1/HBEGF/TXN/PTGS2/ADO/CNST/STARD8/NPC1/ABL2/TMEM38B/LINC01010/GFOD1/RAB1A/STX4/SMIM13/OSGIN1/MAPK6/RABGEF1/MAFK/NRROS/MMP19/DDX5/TRIB1/ANKRD28/SLC38A2/HSPA9/TMEM217/FAM131A/PRKAG2/KLF10/FNIP2/TFRC/COQ10B…
GSE9988_ANTI_TREM1_VS_LOW_LPS_MONOCYTE_UP	GSE9988_ANTI_TREM1_VS_LOW_LPS_MONOCYTE_UP	GSE9988_ANTI_TREM1_VS_LOW_LPS_MONOCYTE_UP	195	0.544549	2.86499	7.84e-05	0.000844536	0.000589738	8460	tags=63%, list=25%, signal=47%	ZCCHC2/PLEKHO1/DUSP14/TNFSF14/CLN8/MT1H/PEX5/MT1G/ATF3/ACVR1/SYN2/LONRF3/SLC8B1/ACSL3/CHST15/ASPH/AMD1/ATP6V1G1/CENPBD1/DHRS9/CNST/NPC1/TMEM38B/LINC01010/GFOD1/KLHL26/STX4/SMIM13/CD300LB/NRROS/MMP19/TRIB1/RARA/ANKRD28/PCYT1A/LASP1/FAM131A/IL17RA/FNIP2/TMBIM1/LIMK1/MAP4K3/TMEM121B/NRIP3/DNMBP/ZNF318/SNX9/HSD3B7/COA7/SLC37A2/RREB1/BCAP31/PNP/SGK1/STARD5/CCR1/SPART/SH3BP5/LGALS3/EIF4A1/PLEKHM2/GTF2I…
GSE22886_NAIVE_CD4_TCELL_VS_DC_DN	GSE22886_NAIVE_CD4_TCELL_VS_DC_DN	GSE22886_NAIVE_CD4_TCELL_VS_DC_DN	200	0.543221	2.86371	8e-05	0.000844536	0.000589738	9027	tags=60%, list=27%, signal=44%	PLCG2/RCBTB2/EIF4G1/TXNRD1/AVPI1/SLC7A8/ITGAX/STAC/OPN3/GCLC/ZNF804A/PGD/SRC/SQSTM1/LIMS1/MFN2/TAX1BP3/ACO2/PYGL/MLX/ANXA5/SDCBP/CTNNA1/ITPRID2/SLC31A2/ARL8B/GLRX2/NPTN/ARMT1/KCTD5/PSEN1/GABARAP/VIM/LAMTOR3/CLIC4/VAMP3/CYCS/SPG21/CREG1/CCR1/ATP6V1E1/CANX/NFE2L1/NCF2/RAB7A/GHITM/BCKDK/PGAM1/GSN/REEP5/ZMIZ1/LARP4B/FLVCR2/PI4K2A/STAM2/NRGN/ATP6V0B/CSNK2A1/RHEB/S100A11/PLEKHB2/CD63/EXOC1/ZMPSTE24/ATP…
GSE24634_TEFF_VS_TCONV_DAY10_IN_CULTURE_DN	GSE24634_TEFF_VS_TCONV_DAY10_IN_CULTURE_DN	GSE24634_TEFF_VS_TCONV_DAY10_IN_CULTURE_DN	197	0.541892	2.85168	7.94e-05	0.000844536	0.000589738	9027	tags=63%, list=27%, signal=46%	ITGA5/ZNF468/SAV1/MLXIPL/CLCF1/HSPA12A/NDRG1/MOB3B/NRP1/HMG20B/APP/CLDN7/VPS37C/CTTN/SLC8B1/ITGAX/ACSL3/PTPRE/RTN1/HLA-B/TCF7/LDLRAP1/ACOX3/ALAS1/S100A13/STARD8/SLC27A3/ZNF185/CAMSAP2/ITGAM/CDA/AKAP1/APOO/TLR1/ZCCHC14/IL6R/CD209/SDCBP/ATP6AP1/ACVR1B/MRC1/NPTN/METTL1/COL8A2/GABARAP/INSR/ST3GAL5/PDLIM5/LYZ/CEP170/CLIC4/VAMP3/BCAP31/SLC11A1/CREG1/WDR43/CCR1/ATP6V1E1/LMO2/FHIT/TLE2/TSPAN3/SPART/NCF2/…
GSE3982_DC_VS_TH2_UP	GSE3982_DC_VS_TH2_UP	GSE3982_DC_VS_TH2_UP	195	0.53987	2.84038	7.84e-05	0.000844536	0.000589738	8153	tags=53%, list=24%, signal=40%	JUP/TLE1/ADM/CDKN1A/NPPC/CLCN7/CLN8/MSRB1/THBD/HLA-DOB/PLCG2/ANXA1/TACSTD2/FAR2/PCSK5/TSC22D1/CREB5/CHST15/SLC22A5/LILRA2/ASPH/RTN2/PDLIM4/CD83/MRAS/TRIO/BPI/FTH1P5/ACO2/ALCAM/PYGL/SORT1/PDE8A/CD209/SLC31A2/TMBIM1/FTH1/HLA-DQB2/CD1D/ENG/COQ10B/PITPNA/CYP27B1/MATK/ATP6V1H/LMO2/LRP10/CCL22/CLEC4A/MITF/NFKBIE/GUCA1A/ANPEP/HSD11B1/UBTD1/FCGR2C/GTF2IRD1/ASPHD1/TNFRSF21/FBXO21/VCL/KDM7A/ENC1/PLXNA1/CHI…
GSE9988_ANTI_TREM1_VS_LPS_MONOCYTE_UP	GSE9988_ANTI_TREM1_VS_LPS_MONOCYTE_UP	GSE9988_ANTI_TREM1_VS_LPS_MONOCYTE_UP	197	0.528509	2.78125	7.94e-05	0.000844536	0.000589738	6688	tags=52%, list=20%, signal=42%	ZCCHC2/PLEKHO1/DUSP14/TNFSF14/KBTBD8/CLN8/MIR22HG/SPRY2/PEX5/CHKA/ATF3/ACVR1/SYN2/AVPI1/LONRF3/SLC8B1/ITGAX/ZBTB21/ACSL3/CHST15/ASPH/AMD1/ATP6V1G1/FAM83G/DHRS9/CNST/NPC1/TMEM38B/LINC01010/GFOD1/KLHL26/STX4/SMIM13/RABGEF1/NRROS/TNFRSF12A/MMP19/TRIB1/RARA/ANKRD28/LASP1/NRBF2/IL17RA/FNIP2/TMBIM1/LIMK1/MAP4K3/TMEM121B/NRIP3/DNMBP/EMP1/HSD3B7/GABARAP/COA7/SLC37A2/RREB1/BCAP31/ZBTB43/SGK1/CCR1/GATAD2A/…
GSE36888_UNTREATED_VS_IL2_TREATED_STAT5_AB_KNOCKIN_TCELL_6H_DN	GSE36888_UNTREATED_VS_IL2_TREATED_STAT5_AB_KNOCKIN_TCELL_6H_DN	GSE36888_UNTREATED_VS_IL2_TREATED_STAT5_AB_KNOCKIN_TCELL_6H_DN	198	0.523488	2.75718	7.95e-05	0.000844536	0.000589738	9151	tags=63%, list=27%, signal=46%	GEM/GATD3A/SPRY2/GREM1/CD1B/SERPINE1/FDX2/CA2/WDR74/GPC4/TSC22D1/AVPI1/CHCHD4/MTIF2/ASPH/ACOX3/GCLC/DAG1/UTP18/CLUH/IL1R2/CD109/CAMK1/SLC17A9/MRPS35/HSPA9/DOCK3/SBF2-AS1/FASTKD2/SPOCD1/PPARGC1B/METTL1/ECHDC1/MCRIP2/COL8A2/COX10/NDUFAF4/EEF1E1/CHD9/MYOF/POLR1C/CYCS/CANX/SLC29A3/COX5B/GLRX3/CD52/FDXACB1/FUCA2/DCTD/ARHGAP10/FAIM/PI4K2A/CD1E/NETO2/BEND3/TIMM21/MRPL4/GRSF1/LARP4/A2M/TREML1/S100A1/PTPM…
GSE22886_NAIVE_TCELL_VS_DC_DN	GSE22886_NAIVE_TCELL_VS_DC_DN	GSE22886_NAIVE_TCELL_VS_DC_DN	200	0.521599	2.74973	8e-05	0.000844536	0.000589738	9787	tags=68%, list=29%, signal=48%	CTNS/FCER2/RCBTB2/NR4A3/NRP1/TXNRD1/CCDC47/SLC7A8/QPCT/SLC16A6/PTPRE/STAC/GCLC/ASAP1/ZNF804A/SLC27A3/PGD/SQSTM1/ZNF185/SDC2/DEF8/CAMK1/ADAM17/MFN2/ACO2/PLIN3/CCDC88A/SDCBP/CTNNA1/SLC31A2/PEA15/GLRX2/RBM47/SLC6A6/RCOR1/KCTD5/SPINT1/GABARAP/VIM/VAMP3/SPG21/CREG1/ATP6V1E1/NFE2L1/MITF/SIRPA/SNX3/ANPEP/RAB7A/DSE/ATP6V1F/BCKDK/ZMIZ1/FLVCR2/PI4K2A/STAM2/NRGN/ATP6V0B/CRIM1/EHD4/BCAR3/PSMD1/PLEKHB2/LARP4/…
GSE24634_IL4_VS_CTRL_TREATED_NAIVE_CD4_TCELL_DAY10_DN	GSE24634_IL4_VS_CTRL_TREATED_NAIVE_CD4_TCELL_DAY10_DN	GSE24634_IL4_VS_CTRL_TREATED_NAIVE_CD4_TCELL_DAY10_DN	196	0.520477	2.73887	7.89e-05	0.000844536	0.000589738	8592	tags=64%, list=26%, signal=48%	CFB/GEM/MICALL2/CDKN1A/IGFBP6/RAI14/SCG5/MSRB1/GREM1/SYNGR1/NRP1/TPBG/HMG20B/MT1H/TCIRG1/MT1G/TXNRD1/IMPA2/GPC4/APP/CLDN7/DNPEP/ATP6V0C/ABHD5/CLIP1/RTN1/IL1RN/TXN/ALAS1/DHRS9/S100A13/SLC27A3/DAG1/PGD/SH3GLB1/ZNF185/TUBB6/CDA/APOO/ACO2/TLR1/TBL2/PYGL/SORT1/OGFRL1/CTNNA1/ADAMDEC1/GLRX2/METTL1/KIAA0513/CYBB/COL8A2/INSR/ST3GAL5/SQOR/CLIC4/CST6/MYOF/SPG21/CREG1/SPR/CCR1/ATP6V1E1/INHBA/GLRX3/ABR/HSD11B…
GSE4984_UNTREATED_VS_GALECTIN1_TREATED_DC_DN	GSE4984_UNTREATED_VS_GALECTIN1_TREATED_DC_DN	GSE4984_UNTREATED_VS_GALECTIN1_TREATED_DC_DN	189	0.521884	2.73388	7.66e-05	0.000844536	0.000589738	3368	tags=36%, list=10%, signal=33%	CXCR5/TCL1A/CD79A/MDS2/VPREB3/FCRL2/NIBAN3/TLE1/AFF3/MIR600HG/IGHV5-78/CD27/CD19/ABCB4/SOX8/FCRLA/DTX1/IGKC/LINC00926/CR2/FCER2/POU2AF1/FCRL5/CORO2B/HLA-DOB/PCDH9/RALGPS2/FCRL1/RPL9/GEMIN4/UTP25/PNOC/SPIB/BTLA/DPH2/PKIG/TSPAN13/SLC7A6/DDR1/IGKV1D-13/BCL7A/MS4A1/DENND5B/UTP20/CD83/MATN1-AS1/BANK1/TRAP1/FLNB/CD200/CHMP7/CD79B/EIF4E/TNFRSF17/MST1L/SPON1/IGHD/QRSL1/EPM2A/SLC16A1/IGLV3-19/APEX1/IGLV1-…
GSE9988_LOW_LPS_VS_ANTI_TREM1_AND_LPS_MONOCYTE_DN	GSE9988_LOW_LPS_VS_ANTI_TREM1_AND_LPS_MONOCYTE_DN	GSE9988_LOW_LPS_VS_ANTI_TREM1_AND_LPS_MONOCYTE_DN	193	0.519619	2.72922	7.8e-05	0.000844536	0.000589738	6250	tags=49%, list=19%, signal=40%	MMP1/ZCCHC2/SERTAD2/GEM/EGR2/ABCB4/DUSP14/SCG5/TNFSF14/LRRC8B/CLN8/SPRY2/ZMIZ1-AS1/CSF1/SERPINE1/ATF3/ACVR1/SYN2/LONRF3/RASGEF1B/ITGAX/ACSL3/PTPRE/ASPH/EDN1/ACOX3/ATP6V1G1/STARD8/NPC1/TMEM38B/LINC01010/GFOD1/ZSCAN5A/STX4/SMIM13/RABGEF1/MAFK/NRROS/MMP19/TRIB1/PHACTR2/ANKRD28/FAM131A/PRKAG2/FNIP2/MAP4K3/NRIP3/ZNF318/WDFY1/SNX9/CRY1/ATP6V1H/ZBTB43/SGK1/CCR1/HES4/ST3GAL6/SOWAHC/SH3BP5/LGALS3/PLEKHM2/…
GSE9988_LPS_VS_LPS_AND_ANTI_TREM1_MONOCYTE_DN	GSE9988_LPS_VS_LPS_AND_ANTI_TREM1_MONOCYTE_DN	GSE9988_LPS_VS_LPS_AND_ANTI_TREM1_MONOCYTE_DN	191	0.516241	2.7082	7.73e-05	0.000844536	0.000589738	6250	tags=50%, list=19%, signal=41%	MMP1/SERTAD2/GEM/PLEKHO1/SCG5/TNFSF14/MIR22HG/SPRY2/MMP10/ZMIZ1-AS1/CSF1/SERPINE1/ATF3/ACVR1/SYN2/TSC22D1/LONRF3/ITGAX/MAPK13/ZBTB21/ACSL3/PTPRE/ASPH/EDN1/ACOX3/TXN/FAM83G/CNST/STARD8/NPC1/TMEM38B/GFOD1/ZSCAN5A/STX4/SMIM13/ANKS6/RABGEF1/MAFK/NRROS/TNFRSF12A/MMP19/PIP4P1/TRIB1/ANKRD28/SLC19A2/FAM131A/PRKAG2/FNIP2/MAP4K3/NRIP3/SNX9/CRY1/ATP6V1H/ZBTB43/SGK1/CCR1/HES4/ST3GAL6/SOWAHC/SH3BP5/PLEKHM2/BA…
GSE24634_TREG_VS_TCONV_POST_DAY7_IL4_CONVERSION_DN	GSE24634_TREG_VS_TCONV_POST_DAY7_IL4_CONVERSION_DN	GSE24634_TREG_VS_TCONV_POST_DAY7_IL4_CONVERSION_DN	197	0.506953	2.66781	7.94e-05	0.000844536	0.000589738	9633	tags=62%, list=29%, signal=45%	DCHS1/PPARD/CDKN1A/IGFBP6/CCL24/KANK1/NRP1/SERPINE1/CA2/C1orf54/ZFYVE16/TCF4/TSC22D1/QPCT/PTPRE/RTN1/TCF7/MEF2A/SLC27A3/SQSTM1/STX4/CCL2/CYP1B1/TMEM63A/ARAP1/TLR1/PYGL/CD209/CCDC88A/FTH1/RBM47/METTL1/CYBB/LILRB4/CYP27B1/ST3GAL5/LYZ/SLC11A2/PRDM4/CREG1/CCL22/GPRASP1/SIRPA/TYROBP/LGALS3/SLC2A6/LARS1/GSN/RASGRP3/HLX/UBE2W/CUX1/RHOQ/CHI3L1/CD63/GALNT12/NACC2/SLC30A1/LRP12/KYNU/FGL2/LHFPL2/RAB20/SLC15…
GSE10325_CD4_TCELL_VS_BCELL_DN	GSE10325_CD4_TCELL_VS_BCELL_DN	GSE10325_CD4_TCELL_VS_BCELL_DN	191	0.497845	2.6117	7.73e-05	0.000844536	0.000589738	7398	tags=55%, list=22%, signal=43%	LARGE1/CXCR5/TCL1A/CD79A/VPREB3/FCRL2/TLE1/RUBCNL/MIR600HG/CD19/ABCB4/ARHGAP24/IGKC/CR2/FCER2/IGHA1/POU2AF1/HLA-DOB/PCDH9/PLCG2/BLK/HDAC9/PNOC/PAX5/SPIB/TCF4/GNG7/EHD3/PKIG/CHST15/TSPAN13/FADS3/IGKV1D-13/BCL7A/CDK14/MS4A1/OPN3/CD83/BANK1/MEF2A/CD200/GFOD1/RAB30/CD79B/IGHD/TUBB6/ADAM28/SH2B2/QRSL1/SLC17A9/IGLV3-19/TCTN1/CD1D/IGLV1-44/DNMBP/CYBB/TRAK1/IGLL3P/CLIC4/WASF1/IGKV4-1/LMO2/HLA-DRB6/SNX3/T…
GSE3982_DC_VS_TH1_UP	GSE3982_DC_VS_TH1_UP	GSE3982_DC_VS_TH1_UP	197	0.494963	2.60471	7.94e-05	0.000844536	0.000589738	8801	tags=54%, list=26%, signal=40%	STAT6/RGCC/CTNS/NPPC/NAGPA/BCL6/PTGDS/CLCN7/CLN8/THBD/ANXA1/LINC00667/C1orf54/TACSTD2/SPRED2/SLC6A12/LILRA2/CAPN3/CFD/LDLRAP1/HPCAL1/FGR/ZNF804A/SLC27A3/MRAS/PROC/SIDT2/PLXNB2/ALCAM/PDE8A/DNASE1L1/TMBIM1/HLA-DQB2/CSDE1/CD1D/PEA15/EPHX3/KCNJ1/METTL1/CYP27B1/GNAQ/MYOF/TRAM1/PARP12/SPI1/GPT/CD52/RASAL2/CDC42BPB/MKKS/NFKBIE/ANPEP/FCGR2C/RUFY3/TET3/FBXO21/CUX1/VCL/C11orf71/CUL4A/RHEB/PLXNA1/CHI3L1/LRR…
GSE10325_LUPUS_CD4_TCELL_VS_LUPUS_MYELOID_DN	GSE10325_LUPUS_CD4_TCELL_VS_LUPUS_MYELOID_DN	GSE10325_LUPUS_CD4_TCELL_VS_LUPUS_MYELOID_DN	200	0.486028	2.56221	8e-05	0.000844536	0.000589738	9511	tags=62%, list=28%, signal=45%	JUP/PLCG2/VPS37C/DUSP6/HMOX1/ITGAX/QPCT/CHST15/LILRA2/CFD/IL1RN/LST1/FCN1/SLC27A3/CYP1B1/CAMK1/ADGRE2/PLXNB2/SLC43A3/PLIN3/LILRB1/OGFRL1/SDCBP/CTNNA1/SLC31A2/PEA15/LILRB2/RBM47/CYBB/ALDH3B1/PTTG1IP/CLIC4/MYOF/TP53I3/SLC11A1/SPG21/CREG1/CCR1/LMO2/CSF1R/CLEC4A/SIRPA/LILRB3/ANPEP/NCF2/TYROBP/VCAN/DSE/LGALS3/SLC2A6/BCKDK/HLX/ATP6V0B/RHOQ/APLP2/NCF1C/NKIRAS2/TMEM164/ATP6V1B2/PISD/KYNU/FGL2/TPD52L2/SLC…
GSE10325_LUPUS_CD4_TCELL_VS_LUPUS_BCELL_DN	GSE10325_LUPUS_CD4_TCELL_VS_LUPUS_BCELL_DN	GSE10325_LUPUS_CD4_TCELL_VS_LUPUS_BCELL_DN	193	0.486408	2.55478	7.8e-05	0.000844536	0.000589738	7305	tags=52%, list=22%, signal=41%	TCL1A/CD79A/VPREB3/FCRL2/TLE1/RUBCNL/CBFA2T3/E2F5/CD19/ABCB4/IGKC/FARP2/FCER2/IGHA1/POU2AF1/HLA-DOB/PCDH9/PLCG2/BLK/PNOC/PAX5/SPIB/TCF4/PIP5K1B/GNG7/EHD3/IGKV3-20/PKIG/CHST15/TSPAN13/COL9A3/COBLL1/IGKV1D-13/CDK14/MS4A1/OPN3/FGR/BANK1/MEF2A/CD79B/TNFRSF17/IGHD/BHLHE41/TUBB6/ADAM28/DEF8/SH2B2/QRSL1/SIDT2/SLC17A9/ALCAM/IGLV3-19/LILRB1/CD1D/MBD4/IGLV1-44/LILRB2/DNMBP/CYBB/IGLL3P/CLIC4/IGKV4-1/LRRK1/H…
GSE30971_WBP7_HET_VS_KO_MACROPHAGE_4H_LPS_STIM_UP	GSE30971_WBP7_HET_VS_KO_MACROPHAGE_4H_LPS_STIM_UP	GSE30971_WBP7_HET_VS_KO_MACROPHAGE_4H_LPS_STIM_UP	199	0.48286	2.54358	7.98e-05	0.000844536	0.000589738	8277	tags=56%, list=25%, signal=43%	ADM/PLK3/RAI14/IL1B/BX255923.2/SPHK1/ZPR1/MSC/KANK1/SLC7A11/GEMIN4/MSANTD3/CXCL5/BTBD19/KCNN4/SPRED2/SRXN1/MAPK13/PROCR/SLC16A6/SLC25A33/SLC7A1/ACSL5/TXN/ASAP1/PTPN12/ZNF697/TMEM38B/PDSS1/MT1M/TUBB6/MTF1/TMEM45B/NIP7/AC093583.1/PSMD14/NOP16/MSC-AS1/SLC41A2/SLC43A3/TRIM13/ODC1/ELOVL7/ACVR1B/DGAT2/METTL1/WDR4/CYP27B1/GSR/AIFM2/DGKH/AIMP2/EEF1AKMT3/GLRX3/CHUK/NIT2/PKM/LAMB3/MAML2/AMPD3/IDI2/CCT5/TIM…
GSE3982_DC_VS_EFF_MEMORY_CD4_TCELL_UP	GSE3982_DC_VS_EFF_MEMORY_CD4_TCELL_UP	GSE3982_DC_VS_EFF_MEMORY_CD4_TCELL_UP	197	0.4826	2.53965	7.94e-05	0.000844536	0.000589738	8977	tags=60%, list=27%, signal=44%	DDX31/CDKN1A/ABCB4/CTNS/CLCN7/FCER2/CLN8/THBD/NRP1/RIPK4/CSF1/ATF3/TXNRD1/APP/TCF4/TACSTD2/TRIP6/LILRA2/CFD/RTN2/PDLIM4/HBEGF/CD83/CCRL2/ALAS1/MRAS/PDSS1/TRIO/FKBP1A/SDC2/ERCC1/ALCAM/SHB/IL6R/ANXA11/CCDC88A/PEA15/MRC1/CYBB/COLEC12/CERS6/CYP27B1/SLC19A1/ATP6V1H/ACO1/VAMP3/MYOF/PABPC4/SPR/AIMP2/ACACA/GATB/LRP10/LRRK1/MITF/SEPHS2/ANPEP/TYROBP/LGALS3/NANS/MID1IP1/FCGR2C/LPAR1/RASGRP3/PPARG/CXCL8/NRGN…
GSE42088_UNINF_VS_LEISHMANIA_INF_DC_8H_UP	GSE42088_UNINF_VS_LEISHMANIA_INF_DC_8H_UP	GSE42088_UNINF_VS_LEISHMANIA_INF_DC_8H_UP	198	0.481851	2.53788	7.95e-05	0.000844536	0.000589738	7216	tags=47%, list=22%, signal=37%	LTBP2/ENPP2/CCL24/CTNS/SCG5/CCDC86/GREM1/FSCN1/NRP1/MMP10/CD1B/MT1H/MT1G/C1orf54/CXCL5/LAMP3/MRTO4/PLCL1/TSEN2/PROCR/PTPRE/STAC/RTN2/PUS7/ADO/ZNF804A/TMEM38B/PPAT/NT5E/NSUN3/GBAP1/MT1M/LSS/BHLHE41/PRR16/PI3/APOO/KIF1B/CD209/UGDH/CD1A/TFRC/ADAMDEC1/VSIG4/MRC1/ARMT1/METTL1/CYP27B1/VAC14/ACO1/BRIX1/SEPTIN10/INHBA/EEF1AKMT3/CCL22/CLEC4A/HSD11B1/NR1H3/GSN/HSPA8/ACP2/PAICS/ATP6V0B/CRIM1/CD1C/VWA8/GLYR1…
GSE36888_UNTREATED_VS_IL2_TREATED_TCELL_2H_DN	GSE36888_UNTREATED_VS_IL2_TREATED_TCELL_2H_DN	GSE36888_UNTREATED_VS_IL2_TREATED_TCELL_2H_DN	197	0.481923	2.53609	7.94e-05	0.000844536	0.000589738	6911	tags=48%, list=21%, signal=38%	HMGA1/ABCA6/TLE1/GEM/TIE1/GATD3A/CD1B/HMG20B/CA2/GPC4/TSC22D1/AVPI1/DNPEP/SLC6A12/RAB11FIP4/SNAI3/SHOX2/ASPH/HSF2BP/GCLC/METTL7B/DHRS9/DAG1/ABL2/LINC01010/ZNF22-AS1/TMEM91/IL1R2/LIMS1/CAMK1/GPAT3/SLC17A9/SPSB1/SHB/DOCK3/SPOCD1/MTUS1/CRABP2/PLOD3/NRIP3/GRHL3/KCNJ1/METTL1/SPINT1/HSD3B7/COL8A2/MAP4K3-DT/ILVBL/CHD9/MRTFB/BCAP31/SHANK3/CANX/SLC29A3/COX5B/CD52/AXL/RASAL2/MITF/MRPS25/MYOZ1/GTF2IRD1/FAIM…
GSE37533_UNTREATED_VS_PIOGLIZATONE_TREATED_CD4_TCELL_PPARG1_AND_FOXP3_TRASDUCED_UP	GSE37533_UNTREATED_VS_PIOGLIZATONE_TREATED_CD4_TCELL_PPARG1_AND_FOXP3_TRASDUCED_UP	GSE37533_UNTREATED_VS_PIOGLIZATONE_TREATED_CD4_TCELL_PPARG1_AND_FOXP3_TRASDUCED_UP	198	0.473085	2.49171	7.95e-05	0.000844536	0.000589738	7505	tags=53%, list=22%, signal=41%	HMGA1/RGCC/CCL24/IL1B/OLR1/MSC/CCDC86/TTLL4/TKFC/FSCN1/HPD/SERPINE1/MAP4K4/CA2/C1orf54/LAMP3/KCNN4/SPRED2/TSC22D1/TMX2/QPCT/ACTN1/STAC/IL1RN/IL1A/TXN/ASAP1/ALAS1/PTPN12/ADO/FGR/TMEM38B/SRC/PDSS1/BCL2A1/IL1R2/BHLHE41/TUBB6/ITGAM/NIP7/RASA3/UBE2J1/ATP13A3/PSMD14/NOP16/ALCAM/SORT1/SLC43A3/IDH3A/CMAS/ATP6AP1/NRIP3/METTL1/G6PD/EMP1/CYP27B1/GSR/VIM/GPX3/CLIC4/ATP6V1H/ABHD2/CYCS/SLC16A3/INHBA/CCL22/RASA…
GSE46468_LUNG_INNATE_LYMPHOID_CELL_VS_SPLEEN_CD4_TCELL_DN	GSE46468_LUNG_INNATE_LYMPHOID_CELL_VS_SPLEEN_CD4_TCELL_DN	GSE46468_LUNG_INNATE_LYMPHOID_CELL_VS_SPLEEN_CD4_TCELL_DN	199	0.468355	2.46717	7.98e-05	0.000844536	0.000589738	6610	tags=48%, list=20%, signal=39%	RRP12/DDX31/MIDN/SPHK1/TNFSF14/LRRC8B/UTP15/KBTBD8/SLC25A32/TTC4/FASTKD5/ILF3/PRSS33/TXNRD1/USP12/MRTO4/TRMT6/PNO1/CYSTM1/MAPKAPK5/TMX2/ESRRA/PPRC1/SLC7A1/PTPRE/URB2/TFB2M/ABCE1/CD83/NECAP1/GSPT1/ATP1A1/NOLC1/SQSTM1/PPAT/PDCD11/IARS1/NOC3L/POLR3C/LTV1/FTH1P5/TNFRSF12A/POLR3D/PPP1R15B/NAB2/MRM3/UTP6/KLF10/EBNA1BP2/PEA15/NPTN/COQ10B/RCOR1/GSR/EEF1E1/EPOP/ZBTB43/MAK16/STRAP/FUNDC2/PURB/SETMAR/MAT2A/…
GSE3982_DC_VS_NKCELL_UP	GSE3982_DC_VS_NKCELL_UP	GSE3982_DC_VS_NKCELL_UP	197	0.466873	2.45689	7.94e-05	0.000844536	0.000589738	7163	tags=45%, list=21%, signal=36%	JUP/ADM/RGCC/CDKN1A/CTNS/NPR1/CLN8/NR4A3/FSCN1/NRP1/CSF1/ATF3/APP/TACSTD2/VPS37C/CTTN/CREB5/ASPH/PDLIM4/IL1RN/CD83/HPCAL1/ALAS1/DHRS9/VDR/MRAS/TRIO/MMP19/TREML2/SHB/CCDC88A/SLC31A2/FTH1/EML4/PEA15/METTL8/RBM47/KCNJ1/SPINT1/CERS6/CYP27B1/SLC19A1/ATP6V1H/HIVEP3/PABPC4/SGK1/CCL22/CDC42BPB/MITF/CCNA1/NFKBIE/GUCA1A/ANPEP/LGALS3/NANS/AMPD3/GSN/IQSEC2/HLX/PPARG/CHST7/FKBP15/TMEM53/MIEF1/CD1E/ENC1/CHI3L1…
GSE41176_WT_VS_TAK1_KO_ANTI_IGM_STIM_BCELL_3H_DN	GSE41176_WT_VS_TAK1_KO_ANTI_IGM_STIM_BCELL_3H_DN	GSE41176_WT_VS_TAK1_KO_ANTI_IGM_STIM_BCELL_3H_DN	200	0.46522	2.45251	8e-05	0.000844536	0.000589738	9254	tags=59%, list=28%, signal=43%	RBM19/GEM/CTNS/TNFSF14/MSC/HES1/NSMAF/EIF4G1/TRMT1/TSR1/IFRD2/PSMD3/DPH2/SLC16A6/URB2/ABCE1/PES1/IL1RN/CCRL2/HK2/NPC1/SQSTM1/EIF4E/CLUH/STX4/CYP1B1/MAPK6/LIMS1/UBE2J1/HYOU1/EIF3B/HSPA9/TNFRSF8/ATP6AP1/TDP2/EBNA1BP2/EMG1/ADAMDEC1/PLOD3/MGAM/METTL1/AKR1B1/GSR/CEP170/ATP6V1H/BCAP31/POLR1C/MAK16/CCR1/INHBA/GTPBP6/ST3GAL6/MFSD5/MAT2A/ATP6V1F/HSP90B1/PTPN6/CSF2/TOMM40/SPINK1/CRIM1/BYSL/CALU/MET/GSTO1/S…
GSE42088_UNINF_VS_LEISHMANIA_INF_DC_4H_UP	GSE42088_UNINF_VS_LEISHMANIA_INF_DC_4H_UP	GSE42088_UNINF_VS_LEISHMANIA_INF_DC_4H_UP	200	0.46261	2.43875	8e-05	0.000844536	0.000589738	9056	tags=56%, list=27%, signal=41%	FSCN1/NRP1/SLC7A11/TXNRD1/LAMP3/RRP1/KCNN4/ILRUN/STIP1/TWSG1/GATAD1/MGAT4B/ABCC1/OPN3/ST13/TXN/ASAP1/CARM1/NECTIN2/PGD/PDSS1/NSUN3/LSS/VCP/SDC2/BHLHE41/TRIM16/KLHDC10/USO1/GLS/PIP5K1C/CD209/PXDC1/CCDC88A/CLEC16A/FTH1/TDP2/LIMK1/MRC1/DTX2/CYP27B1/AKR1B1/TAOK3/VAC14/SQOR/SLC11A2/CLIC4/ATP6V1H/GPD2/ACO1/SLAMF7/ST3GAL2/SEPTIN10/SUSD6/ATP6V1E1/INHBA/PARP12/LPP/CCL22/NFE2L1/RASAL2/MITF/HSD11B1/CLN5/GST…
GSE22886_NAIVE_BCELL_VS_DC_DN	GSE22886_NAIVE_BCELL_VS_DC_DN	GSE22886_NAIVE_BCELL_VS_DC_DN	200	0.460142	2.42574	8e-05	0.000844536	0.000589738	9460	tags=58%, list=28%, signal=42%	RHOC/RCBTB2/NRP1/SLC7A11/EIF4G1/TXNRD1/IMPA2/CCDC47/VPS37C/HMOX1/NQO2/SLC7A8/QPCT/SLC16A6/GCLC/LST1/PGD/TMEM165/VCP/SDC2/FTH1P5/ITGAM/MAP7D1/PSMC1/ARAP1/GLS/PLXNB2/LRRC59/PLIN3/CCDC88A/KLF10/CTNNA1/MAN1A1/SLC31A2/RAP2A/PEA15/GLRX2/RBM47/SPINT1/ECPAS/GPX3/RREB1/VAMP3/RTN4/TIAM1/ATP6V1E1/PINK1/MITF/SIRPA/SEPHS2/ABR/RARS1/DSE/MGAT1/GSN/ZMIZ1/FLVCR2/NRGN/CUX1/EHD4/PSMD1/IL7R/PLEKHB2/CD63/LRP12/ISOC1/…
GSE10325_LUPUS_BCELL_VS_LUPUS_MYELOID_DN	GSE10325_LUPUS_BCELL_VS_LUPUS_MYELOID_DN	GSE10325_LUPUS_BCELL_VS_LUPUS_MYELOID_DN	200	0.458798	2.41866	8e-05	0.000844536	0.000589738	10226	tags=64%, list=31%, signal=45%	ITGA5/TCF7L2/TIMP1/MSRB1/C1orf54/VPS37C/DUSP6/HMOX1/QPCT/LILRA2/PTPRE/CFD/IL1RN/LST1/HK2/CARD9/SLC27A3/CYP1B1/ITGAM/CAMK1/ADGRE2/PLXNB2/PLIN3/LILRB1/SDCBP/SLC31A2/ACVR1B/LILRB2/KIAA0513/ALDH3B1/PTTG1IP/VAMP3/GNAQ/MYOF/SLC11A1/RTN4/SPG21/CREG1/CSF1R/CLEC4A/ST3GAL6/SIRPA/LILRB3/ANPEP/NCF2/BEST1/TYROBP/VCAN/LGALS3/ZMIZ1/FLVCR2/ACTB/S100A6/APLP2/S100A11/MICAL2/TMEM164/LILRA1/NACC2/ATP6V1B2/FGL2/TPD52…
GSE3982_MAC_VS_TH1_UP	GSE3982_MAC_VS_TH1_UP	GSE3982_MAC_VS_TH1_UP	193	0.451116	2.36941	7.8e-05	0.000844536	0.000589738	8312	tags=50%, list=25%, signal=38%	PPARD/RGCC/CTNS/ARHGAP24/SCG5/NAGPA/MYCL/CLCN7/DACT1/CLN8/SPRY2/USP12/KLF9/TACSTD2/HMOX1/SLC6A12/ITGAX/TMX2/SPAG9/EVI2B/RTN1/RGS20/SIN3B/FCN1/PROC/ITGB3/RABGEF1/SIDT2/ARAP1/WSB1/KIF1B/TVP23B/FAM131A/PXDC1/OGFRL1/FTH1/TRIM13/ENG/KCNJ1/TCTA/CEP170/SQOR/PIK3CB/GNAQ/CHD9/CREG1/EEF1AKMT3/GPT/RASAL2/CD101/OSBPL8/IMPACT/MAPK1IP1L/VCL/C11orf71/APLP2/RHEB/IFNAR1/PLXNA1/TMEM251/DOP1B/COMMD10/NTM/TMEM127/TC…
GSE2770_TGFB_AND_IL4_VS_IL4_TREATED_ACT_CD4_TCELL_48H_UP	GSE2770_TGFB_AND_IL4_VS_IL4_TREATED_ACT_CD4_TCELL_48H_UP	GSE2770_TGFB_AND_IL4_VS_IL4_TREATED_ACT_CD4_TCELL_48H_UP	195	0.446362	2.34841	7.84e-05	0.000844536	0.000589738	8051	tags=51%, list=24%, signal=39%	ITGA5/CTNS/IL1B/TTLL4/HPD/ZMIZ1-AS1/TMCO3/TXNRD1/KCNN4/SPRED2/TSC22D1/ATL1/STIP1/ASPH/ABCC1/MCEMP1/IL1A/ZNF701/CCRL2/NPC1/TRIO/VCP/TUBB6/ARCN1/ADAM17/MMP19/ARHGAP31/PDGFA/ALCAM/MSC-AS1/SLC41A2/KIF1B/UST/BTBD7/JAKMIP2/FNIP2/FTH1/TDP2/SERINC1/SNX9/PSEN1/AKR1B1/GSR/SQOR/LAMTOR3/ZC3H12C/ST3GAL2/CREG1/ITPRIPL2/LRP10/ZNFX1/CLN5/AMPD3/PNPLA8/FLVCR2/HSPA8/HAS1/CHST7/STAM2/SPINK1/CSRNP2/PSMD1/SZRD1/ZFP3/G…
GSE26030_UNSTIM_VS_RESTIM_TH17_DAY5_POST_POLARIZATION_DN	GSE26030_UNSTIM_VS_RESTIM_TH17_DAY5_POST_POLARIZATION_DN	GSE26030_UNSTIM_VS_RESTIM_TH17_DAY5_POST_POLARIZATION_DN	189	0.448164	2.3477	7.66e-05	0.000844536	0.000589738	5246	tags=43%, list=16%, signal=37%	TLE1/TNFRSF10A/PER2/CDKN1A/OCSTAMP/CTNS/CASS4/AKAP12/PDGFB/LRRC8B/FCER2/CD1B/TSC22D2/TXNRD1/COA6/FAR2/DNPEP/JAG1/PTPRE/FADS3/NIBAN2/BCL7A/ACSL5/ARRDC4/CD83/ATP6V1G1/ATP1A1/EBF2/NPC1/SLC27A3/GFOD1/RAB30/ADAM15/RYK/IRGQ/FKBP1A/CD300LB/SDC2/NIPA2/MFN2/BICD2/SLC9A2/NOL6/AMPD2/PCYT1A/ANXA11/MPDU1/CD1A/PPARGC1B/PLXNA2/AQP9/METTL1/UBAP2L/G6PD/PITPNA/ANKRD18A/MATK/VIM/KIAA0100/FAM110B/PARP12/PPFIBP1/NCF2…
GSE29618_BCELL_VS_MONOCYTE_DN	GSE29618_BCELL_VS_MONOCYTE_DN	GSE29618_BCELL_VS_MONOCYTE_DN	199	0.444519	2.34161	7.98e-05	0.000844536	0.000589738	8609	tags=56%, list=26%, signal=42%	TCF7L2/TIMP1/MIR22HG/RCBTB2/SFXN3/DUSP6/PCSK5/HMOX1/ATP6V0C/QPCT/ACTN1/CREB5/LILRA2/RTN1/PXN/ZFAND5/HBEGF/PTGS2/GLRX/SLC27A3/CNBP/FKBP1A/CDA/ADGRE2/TRIB1/AMPD2/PLIN3/ANXA5/IL17RA/SDCBP/SLC31A2/PEA15/RBM47/KIAA0513/ALDH3B1/GABARAP/SQOR/PTTG1IP/VIM/VAMP3/GNAQ/RTN4/TIAM1/CREG1/CCR1/CD44/DPYSL2/CLEC4A/LILRB3/PKM/BEST1/SVIL/STXBP2/MGAT1/ZMIZ1/FUT4/S100A6/GSTO1/S100A11/ITGB2/CD63/SERINC5/ATP6V1B2/TPD52…
GSE34156_TLR1_TLR2_LIGAND_VS_NOD2_AND_TLR1_TLR2_LIGAND_24H_TREATED_MONOCYTE_UP	GSE34156_TLR1_TLR2_LIGAND_VS_NOD2_AND_TLR1_TLR2_LIGAND_24H_TREATED_MONOCYTE_UP	GSE34156_TLR1_TLR2_LIGAND_VS_NOD2_AND_TLR1_TLR2_LIGAND_24H_TREATED_MONOCYTE_UP	189	0.446922	2.3412	7.66e-05	0.000844536	0.000589738	8905	tags=57%, list=27%, signal=42%	KAZALD1/NLRP7/BX255923.2/TIMP1/TMCC3/VPS37C/DUSP6/HMOX1/SLC16A6/CHST15/PTPRE/SRC/SULF2/LGALS2/TLN1/GBAP1/FERMT3/LIMS1/ADAM28/ADGRE2/ATP13A3/ABCD1/PLXNB2/ZNF385A/CCDC88A/ANXA5/LILRB2/MAP4K3/RAB2A/RBM47/CYBB/PITPNA/LILRB4/SLC37A2/CLIC4/MYOF/SLC11A1/CREG1/CCR1/LMO2/CSF1R/SIRPA/LILRB3/ANPEP/NCF2/RAB7A/TYROBP/VCAN/DSE/LGALS3/FCGR2C/RRBP1/CXCL16/SLC25A37/DAPP1/PPARG/ACTB/CLEC4E/NCF1C/ATP6V1B2/KYNU/LHFP…
GSE24634_TREG_VS_TCONV_POST_DAY10_IL4_CONVERSION_DN	GSE24634_TREG_VS_TCONV_POST_DAY10_IL4_CONVERSION_DN	GSE24634_TREG_VS_TCONV_POST_DAY10_IL4_CONVERSION_DN	199	0.443526	2.33638	7.98e-05	0.000844536	0.000589738	9027	tags=56%, list=27%, signal=41%	ENPP2/CDKN1A/ABCB4/NRP1/CA2/C1orf54/HMOX1/AVPI1/ITGAX/C1S/CHST15/RTN1/ASPH/LDLRAP1/FGR/SLC27A3/GFOD1/CYP1B1/TUBB6/ITGAM/TLR1/PYGL/SORT1/TFPI/CRABP2/SLC31A2/ENG/ACVR1B/MRC1/AQP9/RBM47/LILRB4/MYOF/TP53I3/BCAP31/CREG1/CCR1/INHBA/SLC29A3/CSF1R/SIRPA/ANPEP/TSPAN3/TYROBP/NR1H3/PLEKHB1/SLC2A6/PAPSS2/FCGR2C/CYP7A1/GSN/RASGRP3/TBC1D1/ADORA3/RHOQ/APLP2/ITGB2/LMNA/CD63/GALNT12/FGL2/LHFPL2/ARHGAP22/SLC15A3/C…
GSE11057_PBMC_VS_MEM_CD4_TCELL_UP	GSE11057_PBMC_VS_MEM_CD4_TCELL_UP	GSE11057_PBMC_VS_MEM_CD4_TCELL_UP	197	0.443087	2.33172	7.94e-05	0.000844536	0.000589738	7283	tags=47%, list=22%, signal=37%	TCL1A/CD79A/JUP/RUBCNL/CD19/IGKC/MYCL/ASAP2/PCDH9/SYNGR1/FCRL1/CA2/PAX5/CXCL5/TCF4/PIP5K1B/DUSP6/HMOX1/QPCT/RTN1/MCEMP1/IGKV1D-13/IL1RN/CARD9/DOCK5/LGALS2/TNFRSF17/PADI4/IGHD/CYP1B1/CD300LB/ADGRE2/PLXNB2/PYGL/SORT1/ZNF385A/CCDC88A/LILRB1/TNFRSF8/SLC31A2/LILRB2/HVCN1/DGAT2/TMEM121B/SPRED1/SLC37A2/MYL9/B3GNT5/SERPINB2/MYOF/CCR1/ITPRIPL2/SPI1/SGMS2/CLEC4A/LILRB3/ANPEP/WDFY4/SLC2A6/FCGR2C/ARL11/NRGN/…
GSE22886_NAIVE_TCELL_VS_MONOCYTE_DN	GSE22886_NAIVE_TCELL_VS_MONOCYTE_DN	GSE22886_NAIVE_TCELL_VS_MONOCYTE_DN	200	0.442015	2.33018	8e-05	0.000844536	0.000589738	9729	tags=62%, list=29%, signal=45%	BCL6/MSRB1/DUSP6/ABHD5/QPCT/SLC16A6/CHST15/LILRA2/PTPRE/RTN1/ZFAND5/FGR/BACH1/GLRX/SLC27A3/PGD/DEF8/ARAP1/PLXNB2/CCDC88A/LILRB1/SDCBP/CTNNA1/SLC31A2/PEA15/RBM47/CYBB/GABARAP/PDLIM5/PTTG1IP/VAMP3/SLC11A1/CREG1/CCR1/CLEC4A/SIRPA/LILRB3/NCF2/VCAN/SH2B3/LGALS3/MID1IP1/MGAT1/BCKDK/ZMIZ1/FLVCR2/IRAK3/FUT4/FKBP15/ATP6V0B/DICER1/RHOQ/APLP2/S100A11/NCF1C/LAPTM5/EXOC1/PLAGL1/ATP6V1B2/PISD/FGL2/SLC15A3/TPP1…
GSE3982_MAST_CELL_VS_DC_DN	GSE3982_MAST_CELL_VS_DC_DN	GSE3982_MAST_CELL_VS_DC_DN	194	0.442464	2.32662	7.8e-05	0.000844536	0.000589738	8223	tags=51%, list=25%, signal=39%	CSRP2/ABCB4/NPR1/FCER2/SYNGR1/TSPAN9/RIPK4/TCIRG1/CA2/ATF3/LAMP3/TACSTD2/CTTN/DNPEP/IGF1R/RAP1GAP/PDLIM4/IL1RN/AKR7A2/HPCAL1/CARD9/NPC1/KLF8/IL1R2/SDC2/TUBB6/PLXNB2/ALCAM/SORT1/ANXA11/KIF1B/MLX/CD209/SLC31A2/HLA-DQB2/KCNJ1/MATK/HIVEP3/MYOF/GNA11/GPT/NUDT13/CCL22/RASAL2/NFKBIE/GUCA1A/ANPEP/HSD11B1/NANS/LPAR1/GTF2IRD1/INF2/EVC/ASPHD1/IQSEC2/HLX/CHST7/FBXO21/MEP1A/CD1E/RHEB/GALNT12/VOPP1/KYNU/PPP2R3…
GSE22886_DAY0_VS_DAY1_MONOCYTE_IN_CULTURE_DN	GSE22886_DAY0_VS_DAY1_MONOCYTE_IN_CULTURE_DN	GSE22886_DAY0_VS_DAY1_MONOCYTE_IN_CULTURE_DN	198	0.43921	2.31329	7.95e-05	0.000844536	0.000589738	6884	tags=48%, list=21%, signal=38%	RHOF/CDKN1A/IL1B/SPHK1/TNFSF14/CLN8/SLC7A11/MT1H/TXNRD1/LAMP3/ZFYVE16/KCNN4/VPS37C/TSC22D1/MAPK13/FICD/STAC/FADS3/ABCC1/IL1RN/ACSL5/HBEGF/TXN/PTGS2/CCRL2/NPC1/VDR/PLIN2/STX4/CCL2/CYP1B1/MAPK6/TUBB6/CAMSAP2/FTH1P5/MTF1/PSMC1/MMP19/ATP13A3/PSMD14/PI3/ALCAM/CCR7/SLC43A3/PXDC1/FTH1/ARL8B/ADAMDEC1/GLRX2/MRC1/NRIP3/EMP1/ATP6V1H/SERPINB2/SLAMF7/BCAP31/ZBTB43/INHBA/FCMR/CCL22/MITF/SOWAHC/CCNA1/NFKBIE/SH3…
GSE19198_6H_VS_24H_IL21_TREATED_TCELL_UP	GSE19198_6H_VS_24H_IL21_TREATED_TCELL_UP	GSE19198_6H_VS_24H_IL21_TREATED_TCELL_UP	199	0.437328	2.30373	7.98e-05	0.000844536	0.000589738	5911	tags=42%, list=18%, signal=35%	FOLR3/ARAP3/MICALL2/EGR2/OLR1/TNFSF14/MYCL/NR4A3/SLC7A11/CD1B/SERPINE1/HMG20B/SLC44A2/ATF3/TXNRD1/ZFYVE16/KCNN4/ACTN1/PKIG/RAB11FIP4/SNAI3/DBH-AS1/RAP1GAP/EDN1/CDK14/HBEGF/CD83/LINC00622/ADO/TMEM52B/SLC27A3/SLC9A7/LGALS2/ZGLP1/TMEM91/GALNS/CYP1B1/CDS1/BPI/ADGRG2/TUBB6/GPAT3/TSPAN33/EPHB6/PRR4/PLCD1/CCR7/ANXA11/DNAJC5B/ITPRIP/METTL1/SLC25A29/SERPINB9P1/CYP27B1/C18orf32/SLAMF7/LMLN/NARS1/SLC29A3/CC…
GSE10325_CD4_TCELL_VS_MYELOID_DN	GSE10325_CD4_TCELL_VS_MYELOID_DN	GSE10325_CD4_TCELL_VS_MYELOID_DN	200	0.436966	2.30357	8e-05	0.000844536	0.000589738	8160	tags=52%, list=24%, signal=40%	CBFA2T3/ADM/CDKN1A/PLEKHO1/BCL6/PLCG2/MAP2K3/RUSC2/SLC6A12/ITGAX/CHST15/LILRA2/OPN3/DHRS9/FGR/CARD9/TLR6/GFOD1/CYP1B1/TUBB6/FTH1P5/ITGAM/ADGRE2/SIDT2/TRIB1/SLC17A9/SH3BP2/SLC43A3/CCDC88A/CTNNA1/SLC31A2/HLA-DQB2/CD1D/PEA15/AQP9/RBM47/PHC2/CYBB/SPINT1/TRAK1/CLIC4/SLC11A1/SLC16A3/CCR1/LMO2/FAM110B/CSF1R/SIRPA/LILRB3/NFKBIE/HLA-DRB6/DSE/SLC2A6/GSN/CD1C/RHOQ/APLP2/OSBPL11/ENC1/NCF1C/SCRN1/HHEX/LYL1/KY…
GSE26495_NAIVE_VS_PD1HIGH_CD8_TCELL_UP	GSE26495_NAIVE_VS_PD1HIGH_CD8_TCELL_UP	GSE26495_NAIVE_VS_PD1HIGH_CD8_TCELL_UP	192	0.437006	2.29361	7.78e-05	0.000844536	0.000589738	6224	tags=36%, list=19%, signal=30%	DCHS1/MDS2/GIPC3/THEM4/CATSPERE/CYP2J2/AC093642.2/EFNA1/SOX8/TBXA2R/TNFRSF10D/TAF4B/NOG/TOP1MT/SCML1/RETREG1/ZBTB18/GNG7/PCSK5/TSEN2/IGF1R/ACTN1/PKIG/EDAR/FAM117B/REG4/LDLRAP1/VIPR1/NAT9/DSC1/MRRF/FLNB/MCF2L-AS1/LEF1/CHMP7/NT5E/SFXN4/SNED1/ZNF285/UBIAD1/KLF7/LEF1-AS1/IL6R/CCR7/SH3YL1/UBQLN2/CNKSR1/OVGP1/FAM184A/CEP170/RNF175/SPART/MAML2/CLN5/SARAF/TP73-AS1/GPRASP2/RFX2/CNKSR2/MICU3/ACSS2/SELL/FBP…
GSE2770_IL12_ACT_VS_ACT_CD4_TCELL_2H_DN	GSE2770_IL12_ACT_VS_ACT_CD4_TCELL_2H_DN	GSE2770_IL12_ACT_VS_ACT_CD4_TCELL_2H_DN	198	0.434655	2.2893	7.95e-05	0.000844536	0.000589738	8005	tags=50%, list=24%, signal=38%	ITGA5/CTNS/IL1B/MSC/HPD/ZMIZ1-AS1/TMCO3/KCNN4/YRDC/UXS1/TSC22D1/EREG/PIM3/TWSG1/FADS3/ABCC1/IL1A/CCRL2/PTPN12/HK2/NPC1/RAB1A/TRIO/TUBB6/CAMSAP2/ITGB3/PTGR1/ADAM17/PSMC1/PDGFA/MTG2/ALCAM/SLC41A2/KIF1B/BTBD7/LINC00884/JAKMIP2/TDP2/EML4/SWT1/BSDC1/PSEN1/GSR/SQOR/INO80C/ZC3H12C/ST3GAL2/DGKH/CREG1/ITPRIPL2/ZNFX1/SIRPA/SOWAHC/RAB7A/C1orf122/AMPD3/HSPA8/USP9X/CTNND1/SPINK1/CRIM1/PSMD1/CALU/OSBPL11/ZFP3/…
GSE34156_UNTREATED_VS_6H_TLR1_TLR2_LIGAND_TREATED_MONOCYTE_UP	GSE34156_UNTREATED_VS_6H_TLR1_TLR2_LIGAND_TREATED_MONOCYTE_UP	GSE34156_UNTREATED_VS_6H_TLR1_TLR2_LIGAND_TREATED_MONOCYTE_UP	192	0.43538	2.28508	7.78e-05	0.000844536	0.000589738	8905	tags=58%, list=27%, signal=43%	ADM/STK38L/THBD/TMCC3/HLA-DOB/TCF4/LRRC49/VPS37C/HMOX1/TSC22D1/RAB34/SLC16A6/CHST15/ASPH/HBEGF/S100Z/ALAS1/SRC/SULF2/LGALS2/ADAM28/ADGRE2/GPAT3/PLXNB2/ZBED5/ZNF385A/ANXA5/LILRB1/ARHGEF2/FAM20C/LILRB2/MAP4K3/RBM47/CYBB/ALDH3B1/LILRB4/MANBAL/SLC37A2/CLIC4/MYOF/SLC11A1/CREG1/LMO2/CSF1R/SIRPA/LILRB3/ANPEP/NCF2/RAB7A/VCAN/DSE/LGALS3/FCGR2C/CXCL16/SLC25A37/DAPP1/PPARG/PTPN6/ATP6V0B/DIP2B/GSTO1/KLK1/CD6…
GSE22886_DAY0_VS_DAY7_MONOCYTE_IN_CULTURE_DN	GSE22886_DAY0_VS_DAY7_MONOCYTE_IN_CULTURE_DN	GSE22886_DAY0_VS_DAY7_MONOCYTE_IN_CULTURE_DN	199	0.433723	2.28474	7.98e-05	0.000844536	0.000589738	9633	tags=56%, list=29%, signal=40%	CA2/MRTO4/IFRD2/ST6GALNAC4/AVPI1/MAPK13/TRIP6/ACSL3/STAC/HPCAL1/ALAS1/ATP1A1/IARS1/STX4/TAX1BP3/APOO/ANXA11/PXDC1/ATP6AP1/TFRC/ENG/PLOD3/GLRX2/G6PD/COL8A2/GPX3/CLIC4/ACO1/BCAP31/SCAMP3/SPR/DLAT/SLC29A3/NIT2/MITF/SEPHS2/TSPAN3/NR1H3/RARS1/GTF2IRD1/ACAT2/UNC13B/GSN/PI4K2A/RASGRP3/ACP2/PPARG/WDR12/CHI3L1/LMNA/LARP4/A2M/PAPSS1/FBP1/FABP5/CORO1C/MYDGF/LAMP1/TIMP2/NDUFAF1/ENO1/ECM1/AFG3L2/NDUFS1/ACP5/M…
GSE22886_NAIVE_CD8_TCELL_VS_MONOCYTE_DN	GSE22886_NAIVE_CD8_TCELL_VS_MONOCYTE_DN	GSE22886_NAIVE_CD8_TCELL_VS_MONOCYTE_DN	200	0.431674	2.27567	8e-05	0.000844536	0.000589738	10509	tags=64%, list=31%, signal=44%	BCL6/PLCG2/APP/DUSP6/HMOX1/ABHD5/QPCT/SLC16A6/CHST15/LILRA2/PTPRE/RTN1/FCN1/FGR/BACH1/SLC27A3/PGD/FTH1P5/ARAP1/PLXNB2/LILRB1/SDCBP/CTNNA1/SLC31A2/LILRB2/CYBB/LYZ/PTTG1IP/ARID3A/VAMP3/SLC11A1/CREG1/SLC16A3/CCR1/CSF1R/CLEC4A/SIRPA/LILRB3/NCF2/TYROBP/VCAN/LGALS3/MGAT1/ZMIZ1/FLVCR2/TET3/IRAK3/APLP2/S100A11/LAPTM5/EXOC1/PLAGL1/CLCN6/PISD/FGL2/SLC15A3/FBP1/C5AR1/TMEM127/CD33/LTBR/SMCO4/CORO1C/RNF130/PT…
GSE41176_WT_VS_TAK1_KO_ANTI_IGM_STIM_BCELL_24H_UP	GSE41176_WT_VS_TAK1_KO_ANTI_IGM_STIM_BCELL_24H_UP	GSE41176_WT_VS_TAK1_KO_ANTI_IGM_STIM_BCELL_24H_UP	199	0.430936	2.27006	7.98e-05	0.000844536	0.000589738	6451	tags=40%, list=19%, signal=33%	HMGA1/SERTAD2/ADM/HIC2/MIR22HG/RHOC/SLC6A8/CA2/TXNRD1/ACVR1/PCSK5/TRIM2/HMOX1/ATP6V0C/JAG1/SPAG9/ACSL3/FICD/CLIP1/NDEL1/ASPH/ZFAND5/PGM3/HPCAL1/GCLC/LST1/FEM1C/FLNB/PGD/SQSTM1/TKT/VCP/TRIM16/TMEM41B/TRIB1/HTATIP2/HYOU1/SOGA1/PCYT1A/YWHAQ/UGDH/DNAJB9/TDP2/ODC1/SLC6A6/PITPNA/EMP1/GSR/VAMP3/BCAP31/CREG1/RNF4/PLEKHM2/RRBP1/MGAT1/GFPT1/KIAA0232/PPARG/PDIA4/ATG4B/FNDC3A/BCAR3/HSPA5/KLHL21/LMNA/SERINC5/…
GSE3982_MAC_VS_NKCELL_UP	GSE3982_MAC_VS_NKCELL_UP	GSE3982_MAC_VS_NKCELL_UP	197	0.431021	2.26822	7.94e-05	0.000844536	0.000589738	7527	tags=51%, list=23%, signal=40%	JUP/ENPP2/PPARD/RGCC/CDKN1A/CTNS/TNFSF14/LRRC8B/CLN8/CSF1/VPS37C/HMOX1/NUMB/TMX2/QPCT/JAG1/STAC/HBEGF/CD83/ZNF804A/SLC23A2/GLRX/DNAJC12/VDR/GALNS/PSMD14/APOO/TRIB1/HTATIP2/SLC43A3/DOCK3/NRBF2/PLIN3/ANXA5/CMAS/SDCBP/CTNNA1/ITPRID2/FTH1/EML4/SMOX/METTL8/NRIP3/KCNJ1/MSRA/COL8A2/CEP170/VAC14/PIK3CB/ATP6V1H/HIVEP3/UTP11/DLAT/COX5B/CCL22/GTF2IRD1/AMPD3/PGAM1/GSN/ACP2/PGRMC1/MIEF1/ELOC/RGS1/FNBP1L/GALNT…
GSE19198_1H_VS_24H_IL21_TREATED_TCELL_DN	GSE19198_1H_VS_24H_IL21_TREATED_TCELL_DN	GSE19198_1H_VS_24H_IL21_TREATED_TCELL_DN	200	0.426222	2.24693	8e-05	0.000844536	0.000589738	5501	tags=42%, list=16%, signal=35%	ITGB2-AS1/FOLR3/ARAP3/MICALL2/EGR2/MSC/MYCL/MOB3B/NR4A3/SEMA7A/SLC7A11/CD1B/C1orf54/WDR74/ZFYVE16/TTYH2/PTPRE/RAP1GAP/HLA-B/NIBAN2/CDK14/HBEGF/CD83/ADO/CARD9/SLC27A3/LGALS2/SFXN4/ZGLP1/TMEM91/CYP1B1/CDS1/TUBB6/NAA25/ITGAM/NRROS/AC093583.1/TSPAN33/VSIR/PLCD1/HTATIP2/AMPD2/CCR7/ANXA11/MSC-AS1/DNAJC5B/PPARGC1B/VARS1/PEA15/METTL1/SLC25A29/TBC1D23/STARD7/OVOL1/MYOF/SLAMF7/TAPT1/EPOP/ZBTB46/CCDC115/CD4…
GSE2770_IL12_AND_TGFB_ACT_VS_ACT_CD4_TCELL_2H_UP	GSE2770_IL12_AND_TGFB_ACT_VS_ACT_CD4_TCELL_2H_UP	GSE2770_IL12_AND_TGFB_ACT_VS_ACT_CD4_TCELL_2H_UP	194	0.427123	2.24595	7.8e-05	0.000844536	0.000589738	6026	tags=44%, list=18%, signal=36%	ITGA5/PPARD/CDKN1A/CTNS/CASS4/SAV1/MSC/LINC00926/RASL10A/NSMAF/HPD/ZMIZ1-AS1/TMCO3/ITGAX/SPAG9/ACSL3/S1PR2/ABCC1/NIBAN2/ST13/LINC00622/CCRL2/EMILIN1/NPC1/ZNF697/PGD/STX4/TRIO/CYP1B1/VCP/TUBB6/PSMD14/TSPAN33/PDGFA/LASP1/TCTN1/KIF1B/CC2D1B/LINC00884/SLC26A11/TDP2/EML4/AP3D1/ZNF667/METTL1/SNX9/RAPGEF1/AKR1B1/GSR/EPOP/HSD11B1/RAB7A/LPAR1/ZMIZ1/FLVCR2/HSPA8/RNASEK/PI4K2A/HAS1/ATP6V0B/NRBP1/SPINK1/PSMD…
GSE11057_CD4_EFF_MEM_VS_PBMC_DN	GSE11057_CD4_EFF_MEM_VS_PBMC_DN	GSE11057_CD4_EFF_MEM_VS_PBMC_DN	193	0.427215	2.24388	7.8e-05	0.000844536	0.000589738	7882	tags=50%, list=24%, signal=39%	CD79A/JUP/HDAC9/NAPSB/TCF4/PIP5K1B/DUSP6/GLT1D1/ITGAX/PTPRE/RTN1/CFD/CARD9/MEF2A/PGD/GFOD1/ZNF185/LGALS2/TKT/TRIO/YWHAG/SH2B2/ADGRE2/PLXNB2/SORT1/ZNF385A/CCDC88A/TNFRSF8/SDCBP/SLC31A2/CD300C/FTH1/PEA15/HVCN1/DGAT2/AQP9/KIAA0513/TRAK1/SPRED1/GABARAP/INSR/LYZ/SLC37A2/B3GNT5/TP53I3/CREG1/GBGT1/ADAMTSL4/SPI1/LILRB3/WDFY4/SLC2A6/FCGR2C/DAPP1/TET3/LINC00968/RHOQ/APLP2/PLXDC2/CD160/ATP6V1B2/CD180/TMEM40…
GSE30971_CTRL_VS_LPS_STIM_MACROPHAGE_WBP7_KO_4H_DN	GSE30971_CTRL_VS_LPS_STIM_MACROPHAGE_WBP7_KO_4H_DN	GSE30971_CTRL_VS_LPS_STIM_MACROPHAGE_WBP7_KO_4H_DN	191	0.426523	2.23754	7.73e-05	0.000844536	0.000589738	7396	tags=49%, list=22%, signal=39%	ABCA6/ITGB2-AS1/RGCC/ANKRD55/CASS4/FILIP1L/SCG5/STK38L/DLC1/AHCYL1/CD1B/SERPINE1/HMG20B/CA2/TXNRD1/C1orf54/KLF9/AVPI1/CREB5/SLC16A6/CPEB4/HPCAL1/LINC00622/LST1/ADO/CCND1/PGD/GFOD1/SLC25A40/KLHL26/NSUN3/IL1R2/CYP1B1/IRGQ/CD300LB/LINC01127/CAMSAP2/CAMK1/TMEM45B/GPAT3/TRMT5/FAM200B/YWHAQ/SPOCD1/CD1A/PPARGC1B/EML4/PFKFB4/MAP4K3/VSIG4/KIAA0513/G6PD/TBC1D23/C5AR2/SLC37A2/ABHD2/RASAL2/MITF/NCF2/LPAR1/CD…
GSE11057_CD4_CENT_MEM_VS_PBMC_DN	GSE11057_CD4_CENT_MEM_VS_PBMC_DN	GSE11057_CD4_CENT_MEM_VS_PBMC_DN	194	0.42331	2.2259	7.8e-05	0.000844536	0.000589738	7245	tags=44%, list=22%, signal=35%	JUP/RUBCNL/CD19/IGKC/MYCL/ASAP2/HDAC9/SYNGR1/PAX5/PIP5K1B/DUSP6/ABHD5/PTPRE/RTN1/CFD/IGKV1D-13/CARD9/BACH1/TLR6/GFOD1/ZNF185/LGALS2/TKT/IGHD/SH2B2/ADGRE2/RB1/OAF/SIDT2/SH3BP2/PLXNB2/SORT1/ZNF385A/CCDC88A/OGFRL1/SLC31A2/HVCN1/DGAT2/TMEM121B/KIAA0513/SLC37A2/B3GNT5/GBGT1/CXXC5/IGKV4-1/ITPRIPL2/ADAMTSL4/SPI1/DPYSL2/LILRB3/WDFY4/STXBP2/FCGR2C/TET3/LINC00968/RHOQ/APLP2/CD160/CD180/CYRIB/SLC15A3/CD9/FB…
GSE9988_ANTI_TREM1_AND_LPS_VS_CTRL_TREATED_MONOCYTES_UP	GSE9988_ANTI_TREM1_AND_LPS_VS_CTRL_TREATED_MONOCYTES_UP	GSE9988_ANTI_TREM1_AND_LPS_VS_CTRL_TREATED_MONOCYTES_UP	190	0.423389	2.21929	7.71e-05	0.000844536	0.000589738	3796	tags=34%, list=11%, signal=30%	MMP1/GEM/ADM/HOMER1/RGCC/CDKN1A/PLK3/SAV1/LRRC8B/CLCF1/HES1/MIR22HG/NSMAF/SPRY2/MMP10/CSF1/GPRC5A/TSC22D2/MSANTD3/SCML1/ADTRP/USP12/TMEM185B/SRXN1/RASGEF1B/SPAG9/CREB5/ACSL3/RPGR/PIM3/ASPH/EDN1/HBEGF/IL1A/TXN/PTGS2/CCRL2/STARD8/NPC1/ABL2/TP53BP2/TMEM38B/RAB1A/OSGIN1/MAPK6/RABGEF1/MAFK/NRROS/PHACTR2/PPP1R15B/SLC38A2/CCR7/SLC19A2/FAM131A/KLF10/FNIP2/TFRC/COQ10B/STARD4/SNX9/ATP6V1H/SGK1/INHBA/HES4
GSE26495_NAIVE_VS_PD1LOW_CD8_TCELL_UP	GSE26495_NAIVE_VS_PD1LOW_CD8_TCELL_UP	GSE26495_NAIVE_VS_PD1LOW_CD8_TCELL_UP	195	0.419444	2.20679	7.84e-05	0.000844536	0.000589738	6224	tags=38%, list=19%, signal=31%	DCHS1/MDS2/COL6A3/ARMH1/CYP2J2/DDX31/SOX8/TBXA2R/TNFRSF10D/TAF4B/CR2/NOG/CCDC141/TWNK/SCML1/RNF157-AS1/RETREG1/LAMP3/SLC8B1/TSEN2/IGF1R/ACTN1/EDAR/FAM117B/LDLRAP1/ST13/VIPR1/NAT9/DSC1/CDK20/FLNB/MCF2L-AS1/LEF1/CHMP7/ZNF22-AS1/NT5E/SFXN4/SNED1/ZNF285/UBIAD1/KLF7/FCGBP/LEF1-AS1/ZNF629/KLHL32/APEX1/FAM184A/EXD2/OXA1L/RNF175/ZNF404/AUXG01000058.1/C11orf1/MRPS25/TP73-AS1/ABCB8/GPRASP2/TTC9/RFX2/CNKSR2…
GSE30971_WBP7_HET_VS_KO_MACROPHAGE_2H_LPS_STIM_UP	GSE30971_WBP7_HET_VS_KO_MACROPHAGE_2H_LPS_STIM_UP	GSE30971_WBP7_HET_VS_KO_MACROPHAGE_2H_LPS_STIM_UP	198	0.41693	2.19595	7.95e-05	0.000844536	0.000589738	7396	tags=47%, list=22%, signal=37%	ITGB2-AS1/RGCC/CCL24/CASS4/FILIP1L/SCG5/TNFSF14/STK38L/SPRY2/GREM1/CD1B/SERPINE1/HMG20B/CHKA/TXNRD1/C1orf54/KLF9/AVPI1/SLC16A6/HPCAL1/LST1/FCN1/ADO/PGD/MRAS/GFOD1/SLC25A40/KLHL26/PADI4/IL1R2/IRGQ/CD300LB/CAMSAP2/ITGAM/CAMK1/TMEM45B/GPAT3/TRMT5/FAM200B/SPOCD1/EML4/PFKFB4/VSIG4/MRC1/KIAA0513/G6PD/C5AR2/SLC37A2/ABHD2/ZNF281/RASAL2/MITF/PKM/NCF2/CD101/LPAR1/TGFB1/RNF135/TBC1D1/EVI2A/CD1E/ENC1/PLXDC2/…
GSE22886_NAIVE_CD4_TCELL_VS_MONOCYTE_DN	GSE22886_NAIVE_CD4_TCELL_VS_MONOCYTE_DN	GSE22886_NAIVE_CD4_TCELL_VS_MONOCYTE_DN	200	0.414111	2.18308	8e-05	0.000844536	0.000589738	9729	tags=59%, list=29%, signal=42%	BCL6/PLCG2/DUSP6/ABHD5/QPCT/SLC16A6/CHST15/LILRA2/PTPRE/ACSL4/FCN1/FGR/GLRX/SLC27A3/PGD/ITGAM/ADGRE2/PLXNB2/IL6R/KLF10/LILRB1/SDCBP/CTNNA1/SLC31A2/LILRB2/GLRX2/NPTN/CYBB/GABARAP/PDLIM5/LYZ/PTTG1IP/VAMP3/SLC11A1/CREG1/CCR1/SPI1/CLEC4A/SIRPA/LILRB3/NCF2/VCAN/SH2B3/LGALS3/MGAT1/ZMIZ1/FLVCR2/IRAK3/FUT4/FKBP15/ATP6V0B/S100A11/NCF1C/MICAL2/EXOC1/CLCN6/PISD/FGL2/SLC15A3/TPP1/FBP1/C5AR1/TALDO1/SMCO4/CORO…
GSE3982_DC_VS_CENT_MEMORY_CD4_TCELL_UP	GSE3982_DC_VS_CENT_MEMORY_CD4_TCELL_UP	GSE3982_DC_VS_CENT_MEMORY_CD4_TCELL_UP	198	0.412652	2.17342	7.95e-05	0.000844536	0.000589738	8390	tags=55%, list=25%, signal=41%	PLA2G4C/DDX31/CASP5/CDKN1A/MIR22HG/PLCG2/NR4A3/SPRY2/RIPK4/CSF1/CD1B/TXNRD1/TACSTD2/NUMB/CTTN/DNPEP/LILRA2/CFD/CD83/FGR/CARD9/NPC1/VDR/MRAS/RALB/SDC2/CDA/ERCC1/PDGFA/ACO2/PLXNB2/PYGL/SORT1/ANXA11/UTP6/CTNNA1/SLC31A2/FTH1/KCNJ1/CYBB/COLEC12/MATK/VAC14/MYOF/AIMP2/CDC42BPB/NFKBIE/ANPEP/HSD11B1/NANS/FCGR2C/LPAR1/BCKDK/TNFRSF21/RASGRP3/PPARG/ATP6V0B/VCL/CD1C/CELSR1/CD1E/ENC1/WDR12/NACC2/SLC30A1/KYNU/S…
GSE22886_NAIVE_BCELL_VS_MONOCYTE_DN	GSE22886_NAIVE_BCELL_VS_MONOCYTE_DN	GSE22886_NAIVE_BCELL_VS_MONOCYTE_DN	200	0.412107	2.17252	8e-05	0.000844536	0.000589738	8216	tags=49%, list=25%, signal=37%	TCF7L2/ANXA1/EIF4G1/DUSP6/ATP6V0C/QPCT/SLC16A6/CHST15/LILRA2/PTPRE/PXN/RPS6KA1/HPCAL1/ATP1A1/GLRX/SLC27A3/PGD/TKT/FTH1P5/ITGAM/MAP7D1/VASP/PLXNB2/IL6R/PAK1IP1/KLF10/LILRB1/SDCBP/SLC31A2/LILRB2/GLRX2/RBM47/TMED1/G6PD/CERS6/LYZ/PTTG1IP/VIM/VAMP3/SLC11A1/RTN4/CREG1/SGK1/SLC16A3/CCT6A/LILRB3/ABR/PKM/NCF2/TYROBP/VCAN/SVIL/LGALS3/STXBP2/MGAT1/ZMIZ1/IRAK3/ALDOA/EVI2A/TWF2/S100A11/MICAL2/IGF2R/PISD/SEL1L…
GSE9988_ANTI_TREM1_AND_LPS_VS_VEHICLE_TREATED_MONOCYTES_UP	GSE9988_ANTI_TREM1_AND_LPS_VS_VEHICLE_TREATED_MONOCYTES_UP	GSE9988_ANTI_TREM1_AND_LPS_VS_VEHICLE_TREATED_MONOCYTES_UP	191	0.410791	2.15501	7.73e-05	0.000844536	0.000589738	6250	tags=39%, list=19%, signal=32%	MMP1/GEM/ADM/HOMER1/RGCC/PLK3/IL1B/INSIG1/SAV1/LRRC8B/NSMAF/SPRY2/MMP10/ZMIZ1-AS1/CSF1/GPRC5A/MSANTD3/SCML1/TXNRD1/ADTRP/USP12/YRDC/SRXN1/NIPAL4/RASGEF1B/SPAG9/CREB5/ACSL3/PIM3/ASPH/IL1A/TXN/PTGS2/CCRL2/STARD8/NPC1/ABL2/TP53BP2/ZSCAN5A/PDSS1/STX4/MAPK6/OTUD4/UBE2J1/MMP19/ANKRD28/PPP1R15B/SLC38A2/CCR7/FNIP2/MGAM/STARD4/AQP9/SNX9/INHBA/SGMS2/ST3GAL6/CCNA1/TNF/PPARG/CXCL8/SPINK1/RHEB/CD274/KLHL21/TM…
GSE29618_BCELL_VS_MONOCYTE_DAY7_FLU_VACCINE_DN	GSE29618_BCELL_VS_MONOCYTE_DAY7_FLU_VACCINE_DN	GSE29618_BCELL_VS_MONOCYTE_DAY7_FLU_VACCINE_DN	200	0.407219	2.14675	8e-05	0.000844536	0.000589738	7870	tags=50%, list=24%, signal=39%	ARAP3/RGCC/MIR22HG/MSRB1/ATF3/C1orf54/IMPA2/VPS37C/DUSP6/PCSK5/HMOX1/QPCT/CREB5/LILRA2/RTN1/PXN/IL1RN/HBEGF/LST1/SLC27A3/PGD/DOCK5/LGALS2/TKT/FKBP1A/ADGRE2/TRIB1/AMPD2/PHACTR2/PYGL/SORT1/KLF10/IL17RA/OGFRL1/SDCBP/CTNNA1/SLC31A2/ATP6AP1/RBM47/KIAA0513/RCOR1/ALDH3B1/GABARAP/VIM/GNAQ/TIAM1/CREG1/SGK1/CCR1/CSF1R/CLEC4A/ST3GAL6/SIRPA/LILRB3/PKM/TYROBP/EIF4A1/MID1IP1/FLVCR2/IRAK3/FUT4/ALDOA/EVI2A/CPQ/M…
GSE34156_UNTREATED_VS_24H_NOD2_LIGAND_TREATED_MONOCYTE_DN	GSE34156_UNTREATED_VS_24H_NOD2_LIGAND_TREATED_MONOCYTE_DN	GSE34156_UNTREATED_VS_24H_NOD2_LIGAND_TREATED_MONOCYTE_DN	196	0.406855	2.14096	7.89e-05	0.000844536	0.000589738	9027	tags=58%, list=27%, signal=42%	RBM19/ADM/TPRXL/TCF4/VPS37C/TSC22D1/GLT1D1/SLC16A6/CHST15/PTPRE/ASPH/ALAS1/ZNF697/VDR/PGD/SRC/SULF2/LGALS2/ADAM28/ADGRE2/ZBED5/ZNF385A/ANXA5/LILRB1/ARHGEF2/CTNNA1/SLC31A2/FAM20C/LILRB2/MAP4K3/SEH1L/RBM47/CYBB/PITPNA/ALDH3B1/LILRB4/GABARAP/MANBAL/CLIC4/MYOF/SLC11A1/CREG1/LMO2/CSF1R/SIRPA/LILRB3/ANPEP/NCF2/RAB7A/NR1H3/VCAN/DSE/LGALS3/FCGR2C/CXCL16/SLC25A37/DAPP1/PTPN6/BYSL/DIP2B/MOB1B/TMEM251/ATP6V…
GSE23321_EFFECTOR_MEMORY_VS_NAIVE_CD8_TCELL_DN	GSE23321_EFFECTOR_MEMORY_VS_NAIVE_CD8_TCELL_DN	GSE23321_EFFECTOR_MEMORY_VS_NAIVE_CD8_TCELL_DN	193	0.40664	2.13581	7.8e-05	0.000844536	0.000589738	7024	tags=46%, list=21%, signal=36%	RRP12/DDX31/RGCC/QSOX2/KBTBD8/CLCF1/RRN3/CSF1/TRMT1/USP12/TMX2/URB2/NDEL1/AMD1/TRMT44/UTP20/CD83/GPATCH4/NAA20/IARS1/NOC3L/RRP9/LTV1/DCAF13/OTUD4/NIPA2/MAFK/NIP7/MRPS30/GEMIN5/PPP1R15B/EIF3B/MRPS35/TRMT10C/SLC19A2/NAB2/LRRC59/VDAC2/EIF6/SDCBP/ARHGEF2/EBNA1BP2/TFRC/SMOX/PGAM5/NDUFAF4/PABPC4/BRIX1/ITPRIPL2/ETF1/PKM/KPNA1/UTP14A/IDI2/ASPHD1/TET3/SLC30A3/CRIM1/ZC3H15/CSNK2A1/GPN2/FEM1A/BEND3/LMNA/SEL…
GSE3982_MEMORY_CD4_TCELL_VS_BCELL_DN	GSE3982_MEMORY_CD4_TCELL_VS_BCELL_DN	GSE3982_MEMORY_CD4_TCELL_VS_BCELL_DN	197	0.402755	2.11947	7.94e-05	0.000844536	0.000589738	7581	tags=46%, list=23%, signal=36%	TLE1/E2F5/IGKC/SAV1/FCER2/IGHA1/POU2AF1/HLA-DOB/PLCG2/CA2/PAX5/SPIB/TCF4/KCNN4/PIP5K1B/GNG7/NUMB/PKIG/TSPAN13/COL9A3/COBLL1/IGKV1D-13/CDK14/MS4A1/OPN3/ADO/BANK1/CD200/CD79B/NT5E/TNFRSF17/LAMP5/IGHD/PUS1/BHLHE41/RABGEF1/QRSL1/UBE2J1/ERCC1/SIDT2/SYPL1/CCT2/CTNNA1/CD1D/ZNF318/CYBB/TRAK1/IGLL3P/REXO4/GABARAP/IGKV4-1/DLAT/LMO2/CLEC4A/TSPAN3/FCGR2C/GSN/RASGRP3/PTPN6/CSNK2A1/HHEX/PAPSS1/CD180/SLC15A3/TB…
GSE42088_UNINF_VS_LEISHMANIA_INF_DC_2H_UP	GSE42088_UNINF_VS_LEISHMANIA_INF_DC_2H_UP	GSE42088_UNINF_VS_LEISHMANIA_INF_DC_2H_UP	196	0.402702	2.11911	7.89e-05	0.000844536	0.000589738	5305	tags=39%, list=16%, signal=33%	MMP1/RBM19/MSC/SNX16/CLGN/HDAC9/TTC4/FSCN1/MMP10/MT1H/MT1G/TXNRD1/CXCL5/LAMP3/RRP1/YRDC/MRTO4/STIP1/FICD/RTN2/CDK14/ACSL5/PGM3/TXN/PUS7/PSD3/ZNF804A/PDSS1/LSS/VCP/PRR16/POLR3D/PCID2/UST/LRRC59/TFPI/GDI1/ANXA5/DNAJB9/JAKMIP2/ADAMDEC1/METTL1/CYP27B1/MATK/SLC11A2/ATP6V1H/ACO1/MTHFD2L/SLAMF7/ST3GAL2/INHBA/CD44/GLRX3/NFE2L1/IPO5/AMPD3/GFPT1/HSPA8/CXCL8/STAM2/PAICS/CSF2/NRBP1/PDE4DIP/SPINK1/CRIM1/BYSL/…
GSE3982_BCELL_VS_CENT_MEMORY_CD4_TCELL_UP	GSE3982_BCELL_VS_CENT_MEMORY_CD4_TCELL_UP	GSE3982_BCELL_VS_CENT_MEMORY_CD4_TCELL_UP	197	0.401728	2.11407	7.94e-05	0.000844536	0.000589738	6406	tags=40%, list=19%, signal=33%	TCL1A/B9D2/E2F5/CDKN1A/IGKC/SAV1/DACT1/FCER2/IGHA1/HLA-DOB/PCDH9/CHKA/CA2/PAX5/SPIB/TCF4/KCNN4/PIP5K1B/ZBTB18/EHD3/NUMB/PKIG/CHST15/JADE3/COBLL1/MS4A1/OPN3/HK2/ADO/FGR/BANK1/ZNF804A/CD200/NT5E/TNFRSF17/LAMP5/IGHD/PUS1/BHLHE41/TUBB6/RABGEF1/SIDT2/TRIB1/TULP2/SYPL1/URB1/FBXW11/CYBB/CASC3/LMO2/CLEC4A/TSPAN3/FCGR2C/AMPD3/RASGRP3/HSP90B1/CD1C/RHOQ/GSTZ1/SCRN1/HHEX/PAPSS1/LYL1/FA2H/SLC15A3/TBC1D9/GNA12…
GSE3982_MAC_VS_EFF_MEMORY_CD4_TCELL_UP	GSE3982_MAC_VS_EFF_MEMORY_CD4_TCELL_UP	GSE3982_MAC_VS_EFF_MEMORY_CD4_TCELL_UP	198	0.398673	2.09978	7.95e-05	0.000844536	0.000589738	6891	tags=42%, list=21%, signal=33%	RUBCNL/PLS1/PLA2G4C/ENPP2/PPARD/CTNS/CLCN7/CLN8/ABCB9/AHCYL1/CSF1/TXNRD1/SLC7A8/ITGAX/QPCT/LILRA2/ST13/CD83/BACH1/GSPT1/ZNF804A/ADAM15/TRIO/GALNS/PROC/VCP/EEF1AKNMT/ALCAM/PIP5K1C/SHB/TVP23B/DOCK3/PDE8A/BTBD7/ANXA5/SDCBP/ATP6AP1/CD1D/ARMT1/SLC6A6/PSEN1/COL8A2/PIK3CB/ACO1/UTP11/COX5B/CCL22/DPYSL2/CLEC4A/OPA1/ANPEP/GTF2IRD1/EMC1/IMPACT/UBE2E1/ASPHD1/FUT4/NRGN/ELOC/LRP3/EVI5/TMEM251/PISD/PPP2R3A/SEL1…
GSE3982_DC_VS_BASOPHIL_UP	GSE3982_DC_VS_BASOPHIL_UP	GSE3982_DC_VS_BASOPHIL_UP	194	0.3975	2.09018	7.8e-05	0.000844536	0.000589738	8991	tags=54%, list=27%, signal=39%	PLA2G4C/PER2/RGCC/RAI14/SPRY2/DUSP7/ATF3/VPS37C/COL14A1/TRIP6/RTN2/HBEGF/CD83/MORC2/HPCAL1/ASAP1/ADO/NPC1/IARS1/SNED1/ST8SIA2/FGFR4/SIDT2/ALCAM/SPSB1/PDE8A/FASTKD2/MTX1/CYBB/CERS6/MATK/ILVBL/HIVEP3/MYOF/ABHD2/TIAM1/ZBTB43/AIMP2/INHBA/LPP/CCL22/LAMC3/CDC42BPB/NANS/GTF2IRD1/BCKDK/PGAM1/PREPL/PPARG/NRGN/FBXO21/CD1C/CELSR1/WDR12/CHI3L1/GALNT12/ATP6V1B2/KYNU/PPP2R3A/ACVR2A/CBR1/ZNF446/SMCO4/STXBP1/EIF…
GSE34156_NOD2_LIGAND_VS_TLR1_TLR2_LIGAND_6H_TREATED_MONOCYTE_DN	GSE34156_NOD2_LIGAND_VS_TLR1_TLR2_LIGAND_6H_TREATED_MONOCYTE_DN	GSE34156_NOD2_LIGAND_VS_TLR1_TLR2_LIGAND_6H_TREATED_MONOCYTE_DN	187	0.397647	2.07937	7.59e-05	0.000844536	0.000589738	8905	tags=55%, list=27%, signal=41%	TIMP1/TMCC3/VPS37C/SLC16A6/CHST15/LINC01016/PTPN12/ZNF697/VDR/PGD/SULF2/LGALS2/TLN1/GBAP1/FERMT3/LIMS1/ADAM28/ADGRE2/ATP13A3/ABCD1/ZNF787/PLXNB2/ZNF385A/ANXA5/FAM20C/LILRB2/MAP4K3/RBM47/CYBB/PITPNA/LILRB4/CLIC4/MYOF/CREG1/CCR1/LMO2/ACVRL1/TMEM158/SIRPA/LILRB3/ANPEP/NCF2/RAB7A/TYROBP/VCAN/DSE/LGALS3/FCGR2C/RRBP1/CXCL16/SLC25A37/DAPP1/PPARG/ACTB/CXCL8/NCF1C/ATP6V1B2/KYNU/LHFPL2/CORO1C/RNF130/PTAFR/…
GSE2770_TGFB_AND_IL4_ACT_VS_ACT_CD4_TCELL_48H_UP	GSE2770_TGFB_AND_IL4_ACT_VS_ACT_CD4_TCELL_48H_UP	GSE2770_TGFB_AND_IL4_ACT_VS_ACT_CD4_TCELL_48H_UP	197	0.394547	2.07628	7.94e-05	0.000844536	0.000589738	5359	tags=38%, list=16%, signal=32%	ITGA5/VPS9D1/CDKN1A/CTNS/IL1B/TNFRSF10D/SAV1/CLCN7/UNK/KCNN4/TSC22D1/ATL1/SPAG9/HLA-B/ZNF513/ABCC1/ACOX3/IL1A/CCRL2/PTPN12/HK2/STARD8/NPC1/SH3GLB1/VCP/TUBB6/ARCN1/ADAM17/PSMC1/ARHGAP31/PSMD14/ALCAM/MSC-AS1/SLC41A2/SLC43A3/LINC00884/TDP2/EML4/ADAMDEC1/AP3D1/DGAT2/METTL1/SNX9/SQOR/LAMTOR3/ATP6V1H/SERPINB2/ZC3H12C/PSMB7/CREG1/SUSD6/LRP10/PSMA1/RAB7A/C1orf122/AMPD3/HSPA8/TNF/ADIPOR2/CRIM1/CSRNP2/PSMD…
GSE45881_CXCR6HI_VS_CXCR1LO_COLONIC_LAMINA_PROPRIA_DN	GSE45881_CXCR6HI_VS_CXCR1LO_COLONIC_LAMINA_PROPRIA_DN	GSE45881_CXCR6HI_VS_CXCR1LO_COLONIC_LAMINA_PROPRIA_DN	195	0.394573	2.07594	7.84e-05	0.000844536	0.000589738	7871	tags=45%, list=24%, signal=35%	TCL1A/CD79A/INPP5F/FCRL2/ABCA6/RUBCNL/CBFA2T3/ENPP2/CD19/ABCB4/FCER2/POU2AF1/RALGPS2/CEACAM6/SELP/PNOC/RNF41/PAX5/SPIB/TCF4/KCNN4/EHD3/ZNF430/PKIG/CDK14/UGT8/SLC23A2/CD200/DAG1/GFOD1/CD79B/QRSL1/NIP7/TREML2/TCTN1/PLIN3/CCDC88A/MTHFS/DNMBP/TMED1/TRAK1/TCTA/MAPRE3/GPT/PPFIBP1/SH3BP5/LAMB3/FCGR2C/HEMK1/ARPC1B/RASGRP3/MYO1E/NCF1C/IGSF3/RHOBTB2/VOPP1/DOP1B/TPD52L2/ARHGAP22/TBC1D9/EFCAB2/KIF1A/GNA12/AT…
GSE3982_DC_VS_BCELL_UP	GSE3982_DC_VS_BCELL_UP	GSE3982_DC_VS_BCELL_UP	195	0.393207	2.06875	7.84e-05	0.000844536	0.000589738	8576	tags=51%, list=26%, signal=38%	CSRP2/RGCC/CDKN1A/CTNS/CLN8/ANXA1/SPRY2/SYNGR1/FSCN1/NRP1/ATF3/APP/TACSTD2/LILRA2/CD83/CCRL2/ALAS1/DHRS9/NPC1/SLC27A3/MRAS/TUBB6/MMP19/PDGFA/PHACTR2/PLXNB2/SPSB1/SORT1/CD209/SLC31A2/EML4/RAP2A/PEA15/KCNJ1/CYP27B1/SLC19A1/COL8A2/PTTG1IP/ATP6V1H/ACO1/MYOF/ABHD2/ZBTB43/MITF/HSD11B1/TYROBP/ACAT2/ARHGAP10/PPIP5K1/EVC/ASPHD1/TNFRSF21/CXCL8/TMEM53/VCL/CD1C/MIEF1/MEP1A/CD1E/RHEB/ENC1/MICAL2/CHI3L1/GALNT1…
GSE29618_BCELL_VS_MDC_UP	GSE29618_BCELL_VS_MDC_UP	GSE29618_BCELL_VS_MDC_UP	191	0.393373	2.06364	7.73e-05	0.000844536	0.000589738	2607	tags=25%, list=8%, signal=23%	CXCR5/TCL1A/CD79A/AQP3/FCRL2/IGHG1/TLE1/RUBCNL/E2F5/CD19/ARHGAP24/IGKC/FCER2/POU2AF1/PCDH9/PLCG2/BLK/MAP4K4/PNOC/PAX5/PIP5K1B/IGKV3-20/ZNF430/PKIG/CHST15/TSPAN13/COBLL1/CDK14/MS4A1/ADD2/BANK1/ST6GAL1/CHMP7/RAB30/CD79B/NT5E/NOC3L/RYK/IGHD/ADAM28/PIKFYVE/OPHN1/KLF7/SNRNP70/IGLV3-19/SYPL1/CCR7
GSE37301_LYMPHOID_PRIMED_MPP_VS_GRAN_MONO_PROGENITOR_UP	GSE37301_LYMPHOID_PRIMED_MPP_VS_GRAN_MONO_PROGENITOR_UP	GSE37301_LYMPHOID_PRIMED_MPP_VS_GRAN_MONO_PROGENITOR_UP	195	0.389524	2.04938	7.84e-05	0.000844536	0.000589738	6504	tags=39%, list=19%, signal=32%	RRP12/COL6A3/PLK3/PRRX2/TAF4B/BCL6/TTC4/GEMIN4/ILF3/DDX3X/TMEM185B/MAPKAPK5/ATP6V0C/DPH2/AHCTF1/MCAT/NDEL1/ABCE1/HK2/SRSF6/RIOX2/PPAT/NT5E/NOC3L/POLR3C/TNFRSF17/OTUD4/AKAP1/IPO4/RRP15/HSPA9/NRBF2/IDH3A/CCT2/RSL1D1/DIMT1/RBM12/ODC1/USP16/EIF3D/CLIC4/HIVEP3/NARS1/CD44/SLC29A3/RPF1/CHUK/TOMM20/OPA1/MAT2A/AKAP8/PGAM1/EMC1/REL/PMPCA/CXCL8/PAICS/ZC3H15/CUL4A/MMS19/CHSY1/SIK1/MRPL4/GRSF1/ZMPSTE24/PISD/B…
GSE21670_UNTREATED_VS_IL6_TREATED_STAT3_KO_CD4_TCELL_UP	GSE21670_UNTREATED_VS_IL6_TREATED_STAT3_KO_CD4_TCELL_UP	GSE21670_UNTREATED_VS_IL6_TREATED_STAT3_KO_CD4_TCELL_UP	197	0.386094	2.0318	7.94e-05	0.000844536	0.000589738	6288	tags=39%, list=19%, signal=32%	AQP3/YPEL4/RGCC/CD27/TOB1/PNMA8A/RCBTB2/SFXN3/UBXN11/GPC4/RSPH3/ATL1/TTYH2/EVI2B/GCNT4/RTN1/FLNA/SIRPG/CLDN12/DHRS9/TLR6/KLF3-AS1/CD109/ADAM28/MAP7D1/GABBR1/TMEM63A/GPAT3/TSPAN33/VSIR/PYGL/CALCOCO1/CCDC88A/IL17RA/SDCBP/TMBIM1/ATP6AP1/HVCN1/CYBB/G6PD/LYZ/SLC44A1/CREG1/FCMR/CD52/DPYSL2/PPFIBP1/CSF1R/VPS45/MITF/MINDY1/LGALS3/GSN/SH3BGRL3/CRIM1/EVI2A/CLEC4E/KLHL3/SORBS3/CSGALNACT2/MYO1E/GSTO1/ITGB2/P…
GSE17974_1H_VS_72H_UNTREATED_IN_VITRO_CD4_TCELL_UP	GSE17974_1H_VS_72H_UNTREATED_IN_VITRO_CD4_TCELL_UP	GSE17974_1H_VS_72H_UNTREATED_IN_VITRO_CD4_TCELL_UP	195	0.385934	2.03048	7.84e-05	0.000844536	0.000589738	6444	tags=43%, list=19%, signal=35%	GEM/DDX21/ADNP2/TNFSF14/UTP15/PUS3/SMCR8/CCDC86/SLC25A32/ANXA1/DDX3X/ALG13/SLC5A6/TRMT6/DDX19B/DGCR11/SLC25A33/YTHDF1/IKZF5/ATP6V1G1/DNAJB12/FCN1/BACH1/RHBDD2/PFN2/RAB30/MTMR9/RYK/LTV1/ADGRE2/NOL6/TRIB1/ARHGAP21/ANKRD28/LEF1-AS1/RBSN/FKRP/DNAJB9/BCCIP/PPARGC1B/ARL8B/FBXL3/ZHX1/SNX9/TBC1D23/TCTA/CRY1/AC008429.1/ZNF281/ZNFX1/FCMR/RPF1/IQSEC1/MAT2A/SVIL/SH2B3/ZNF202/AKAP8/RAPGEF6/CXCL16/PLEKHH2/TIMM…
GSE2770_IL4_ACT_VS_ACT_CD4_TCELL_6H_DN	GSE2770_IL4_ACT_VS_ACT_CD4_TCELL_6H_DN	GSE2770_IL4_ACT_VS_ACT_CD4_TCELL_6H_DN	198	0.385445	2.03012	7.95e-05	0.000844536	0.000589738	8005	tags=47%, list=24%, signal=36%	EIF2B5/TRIM55/PPARD/CTNS/TNFRSF10D/SAV1/MSC/ZMIZ1-AS1/SPRED2/YRDC/SPAG9/ACSL3/ZNF513/ABCC1/NIBAN2/CCRL2/NPC1/ZNF697/STX4/CYP1B1/VCP/TUBB6/ADAM17/PSMC1/VASP/PCID2/NLRC4/SLC41A2/BTBD7/LINC00884/SLC26A11/ARHGEF2/CD276/EML4/METTL1/G6PD/PITPNA/EMP1/PSEN1/GSR/LAMTOR3/EPOP/ZNFX1/SOWAHC/CCNA1/HSD11B1/RARS1/LPAR1/FLVCR2/HSPA8/ZNF664/PSMD1/IL10RB-DT/GPN2/CD63/PTPRJ/IGF2R/FUS/ATP6V1B2/LRP12/MFSD2A/KYNU/CYP5…
GSE37301_LYMPHOID_PRIMED_MPP_VS_RAG2_KO_NK_CELL_UP	GSE37301_LYMPHOID_PRIMED_MPP_VS_RAG2_KO_NK_CELL_UP	GSE37301_LYMPHOID_PRIMED_MPP_VS_RAG2_KO_NK_CELL_UP	197	0.384625	2.02407	7.94e-05	0.000844536	0.000589738	8327	tags=47%, list=25%, signal=35%	RRP12/PRRX2/DDX21/ZPR1/TNFSF14/TTC4/AHCYL1/CSF1/RRP1/SLC5A6/PNO1/ATP6V0C/DPH2/PPRC1/AHCTF1/MCAT/ABCE1/IL22/ATP1A1/SRSF6/UTP18/RIOX2/NRIP1/PPAT/NT5E/POLR3C/CLUH/RRP9/OTUD4/AKAP1/IPO4/SHB/HSPA9/SLC43A3/IDH3A/FASTKD2/RNMT/ZFR/UTP6/TAF1A/EIF3D/NCL/EMP1/CYP27B1/CLIC4/MTRR/RPF1/PPP2CA/TOMM20/IPO5/AKAP8/PGAM1/EMC1/PMPCA/PAICS/EVI2A/EHD4/ZC3H15/CUL4A/MON1B/CHSY1/OGFOD1/GRSF1/FUS/SERINC5/TRAF3/RAB20/SEL1L…
GSE10856_CTRL_VS_TNFRSF6B_IN_MACROPHAGE_DN	GSE10856_CTRL_VS_TNFRSF6B_IN_MACROPHAGE_DN	GSE10856_CTRL_VS_TNFRSF6B_IN_MACROPHAGE_DN	179	0.388414	2.01964	7.34e-05	0.000844536	0.000589738	7505	tags=45%, list=22%, signal=35%	SLC25A25/RHOF/KBTBD8/UNK/KLK7/LINC00667/TMCO3/C1orf54/MYBBP1A/SYVN1/LONRF3/ACTN1/ZBTB21/SLC22A5/TFB2M/FLNB/TMEM38B/ZFAND6/LINC01010/STX4/TMEM91/LTV1/PUS1/TOR1B/MAPK6/NIP7/SPSB1/FAM131A/SRPRA/NUS1/BCCIP/CMAS/MDGA2/EBNA1BP2/MATK/TAOK3/TMEM69/AIMP2/RMDN2/CD52/RASAL2/CDH11/PTCD2/NDUFA5/FAM13B/GNPNAT1/LINC00968/ASB5/MYO1E/CRLS1/ELOC/TIMM21/MESD/RHOBTB2/GALNT12/MUC2/SCO1/PIP4K2C/PAPSS1/MTAP/HM13/ENTHD1…
GSE9988_ANTI_TREM1_VS_ANTI_TREM1_AND_LPS_MONOCYTE_UP	GSE9988_ANTI_TREM1_VS_ANTI_TREM1_AND_LPS_MONOCYTE_UP	GSE9988_ANTI_TREM1_VS_ANTI_TREM1_AND_LPS_MONOCYTE_UP	199	0.382096	2.01278	7.98e-05	0.000844536	0.000589738	8044	tags=49%, list=24%, signal=38%	ZCCHC2/PLEKHO1/ELOVL1/DUSP14/RNF41/ST6GALNAC6/CAMKK1/SLC8B1/AMD1/CENPBD1/DHRS9/CNBP/LINC01010/FEM1B/KLHL26/POLR3C/CNIH1/YWHAG/CD300LB/JMJD8/MAP7D1/TLR1/RARA/LASP1/UBQLN2/PRKAG2/TSPAN17/NRBF2/FASTKD2/NUS1/DNASE1L1/FTH1/MBD4/TMEM121B/PHC2/GABARAP/PAFAH1B2/SLC37A2/RREB1/CDV3/BCAP31/PNP/CXXC5/CCR1/SH3BP5/KLHL20/BCKDK/CXCL16/ARL11/KIAA0232/NFIC/PI4K2A/PTPN6/ACTB/FKBP15/NRBP1/ALDOA/FBXO45/MIEF1/TWF2/CH…
GSE43863_TH1_VS_TFH_MEMORY_CD4_TCELL_UP	GSE43863_TH1_VS_TFH_MEMORY_CD4_TCELL_UP	GSE43863_TH1_VS_TFH_MEMORY_CD4_TCELL_UP	199	0.380508	2.00442	7.98e-05	0.000844536	0.000589738	7856	tags=46%, list=24%, signal=36%	NFX1/ADM/HOMER1/EGR2/SLC25A32/CCDC141/IFRD2/MAP2K3/ST6GALNAC4/SLC7A1/GRHL1/SNAI3/URB2/SLC7A6/KLF16/SRSF6/UTP18/PPAT/IARS1/EIF4E/IL1R2/YWHAG/RRP9/AKAP1/SLC16A1/POLR3D/ALCAM/HSPA9/SRPRA/NUS1/UTP6/ODC1/PAFAH1B2/UTP4/ZC3H12C/CDV3/PSMB7/MTRR/EPOP/AIMP2/EME2/MAK16/DNAJA2/FASN/CCT6A/ETF1/MFSD5/MAT2A/C7orf50/IDE/RIOX1/NAA50/NRGN/ZC3H15/MYO1E/SELENOI/IGF2R/SRFBP1/LGALS3BP/SPRYD7/SLC15A3/NOP9/FABP5/XPOT/EI…
GSE17974_2.5H_VS_72H_IL4_AND_ANTI_IL12_ACT_CD4_TCELL_UP	GSE17974_2.5H_VS_72H_IL4_AND_ANTI_IL12_ACT_CD4_TCELL_UP	GSE17974_2.5H_VS_72H_IL4_AND_ANTI_IL12_ACT_CD4_TCELL_UP	196	0.378292	1.99066	7.89e-05	0.000844536	0.000589738	6807	tags=40%, list=20%, signal=32%	RRP12/NFX1/HIC2/ADNP2/TRMT61A/SLC25A32/ANXA1/NR4A3/WDR73/ALG13/ZNF746/QPCT/SLC7A1/MCAT/CD83/NAT9/GPATCH4/NRIP1/CHMP7/GFOD1/PUS1/OTUD4/NIPA2/RASA3/PDGFA/ARHGAP21/NOP16/SLC38A2/FKRP/TRMT10C/MRPS23/MTUS1/TMBIM1/EMG1/TOLLIP/SLC11A2/NDUFAF4/ARFGEF2/MTHFD2L/WDR43/FCMR/RPF1/DSE/SH2B3/RAPGEF6/REL/SMURF1/MAPK1IP1L/HCG18/CCDC93/IL7R/POLR1A/PLEKHB2/RALA/PSMA3-AS1/LZTS3/OSTM1/NUFIP1/ATG101/ZBTB9/RNF130/MRPL2…
GSE43863_NAIVE_VS_MEMORY_TFH_CD4_TCELL_D150_LCMV_DN	GSE43863_NAIVE_VS_MEMORY_TFH_CD4_TCELL_D150_LCMV_DN	GSE43863_NAIVE_VS_MEMORY_TFH_CD4_TCELL_D150_LCMV_DN	197	0.378271	1.99063	7.94e-05	0.000844536	0.000589738	5562	tags=37%, list=17%, signal=31%	RBPMS2/HMGA1/ADM/HOMER1/DDX31/EGR2/PLK3/SLC25A32/SEMA7A/ATF3/SLC5A6/MRPL50/MRTO4/IFRD2/ST6GALNAC4/TRMT6/CHCHD4/RAB34/ACTN1/SLC25A33/SLC7A1/GRHL1/URB2/SLC7A6/KLF16/SCN1A/GSPT1/PPAT/EIF4E/NOC3L/RRP9/IFNLR1/GRWD1/SLC16A1/APOO/TRIB1/POLR3D/NOP16/GJC3/SLC19A2/IDH3A/NUS1/UTP6/ODC1/UTP4/ZC3H12C/PRDM4/MTRR/EPOP/WDR43/AIMP2/MAK16/CD44/FASN/ETF1/CLEC12B/MAT2A/EIF4A1/LARS1/C7orf50/TMEM150A/RIOX1/NAA50/NAF1/…
GSE29618_BCELL_VS_MONOCYTE_UP	GSE29618_BCELL_VS_MONOCYTE_UP	GSE29618_BCELL_VS_MONOCYTE_UP	191	0.376597	1.97563	7.73e-05	0.000844536	0.000589738	2607	tags=25%, list=8%, signal=23%	CXCR5/CD79A/AQP3/FCRL2/IGHG1/TLE1/RUBCNL/AFF3/E2F5/CD19/ABCB4/IGKC/FCER2/POU2AF1/HLA-DOB/PCDH9/PLCG2/PNOC/PAX5/TCF4/GNG7/IGKV3-20/PKIG/TSPAN13/COBLL1/IGKV1D-13/BCL7A/CDK14/MS4A1/DENND5B/ADD2/BANK1/ST6GAL1/CHMP7/RAB30/CD79B/NT5E/KLF8/NOC3L/IGHD/ADAM28/PIKFYVE/QRSL1/RABEP1/ESF1/SNRNP70/SYPL1/CCR7
GSE22886_CD8_TCELL_VS_BCELL_NAIVE_DN	GSE22886_CD8_TCELL_VS_BCELL_NAIVE_DN	GSE22886_CD8_TCELL_VS_BCELL_NAIVE_DN	182	0.37894	1.97543	7.41e-05	0.000844536	0.000589738	7303	tags=44%, list=22%, signal=35%	LARGE1/TCL1A/MIR600HG/EGR2/CD19/TAF4B/CR2/RASL10A/CORO2B/HLA-DOB/PLCG2/HDAC9/POU6F1/SPIB/APP/TCF4/PIP5K1B/DUSP6/PKIG/TSPAN13/DDR1/FADS3/BCL7A/CDK14/MS4A1/CD83/BANK1/CD200/RDH8/SLC9A7/TLR6/RAB30/IGHD/GABBR1/TRIM25/SH2B2/PCDHGA10/MYOZ3/TREML2/SOGA1/CTNNA1/PEG10/DNMBP/GTPBP3/MYOF/CLEC4A/PHF7/HLA-DRB6/PAPSS2/TCL6/TBC1D30/CNKSR2/ZNF112/DNASE1L3/ATP11A/HHEX/KYNU/CD180/CYP51A1/LHFPL2/SLC15A3/MID1/BCL2L2…
GSE17974_2H_VS_72H_UNTREATED_IN_VITRO_CD4_TCELL_UP	GSE17974_2H_VS_72H_UNTREATED_IN_VITRO_CD4_TCELL_UP	GSE17974_2H_VS_72H_UNTREATED_IN_VITRO_CD4_TCELL_UP	195	0.375284	1.97445	7.84e-05	0.000844536	0.000589738	6524	tags=44%, list=20%, signal=36%	EGR2/PLEKHO1/PHLDA1/IL1B/ESYT3/DDX21/TNFSF14/UTP15/PUS3/ANXA1/SLC5A6/YRDC/MRTO4/TRMT6/CD83/ATP6V1G1/FAM83G/BACH1/BCL2A1/RYK/LTV1/GABBR1/NOL6/FKRP/URB1/SLC20A2/ITPRIP/KLF10/ARHGEF2/TMEM121B/METTL1/SNX9/ASB6/ZNF542P/AP4E1/ARFGEF2/MTHFD2L/DDX28/BRIX1/C12orf43/FAM199X/TSPAN3/PIK3CA/SH2B3/ZSWIM6/IDI2/RAPGEF6/EIF5/TIMM23/ST6GALNAC1/SMURF1/CXCL8/FBXO21/CSRNP2/KCNH8/ATP6V0A2/POLR1A/ENC1/SYNCRIP/PLXNA1/C6…
GSE24634_TREG_VS_TCONV_POST_DAY3_IL4_CONVERSION_DN	GSE24634_TREG_VS_TCONV_POST_DAY3_IL4_CONVERSION_DN	GSE24634_TREG_VS_TCONV_POST_DAY3_IL4_CONVERSION_DN	199	0.37359	1.96798	7.98e-05	0.000844536	0.000589738	9729	tags=54%, list=29%, signal=38%	CDKN1A/NAGPA/TIMP1/KCNS3/NRP1/TCIRG1/C1orf54/AOC1/JAG1/CARD9/BACH1/GBAP1/CCL2/SDC2/CDA/TGM2/TLR1/EMC3/UST/PLIN3/PXDC1/DNAJB9/DNASE1L1/ENG/PLOD3/TRAM2/ST3GAL5/SLAMF7/SLC11A1/SEPTIN10/CREG1/LMO2/COX5B/HLA-DRB6/NR1H3/DSE/LGALS3/ARHGAP10/ATP6V0B/EHD4/FNDC3A/IL7R/ITGB2/ARMH3/SERINC5/ARHGAP22/CRYBG3/DAB2/SLC15A3/CD33/TCEAL1/RNF130/RIT1/TMEM9B/ABCC3/LAMP1/SLC22A18/TRAPPC12/PLEK/ACP5/SYK/TFEC/CTSZ/SNX27/…
GSE12392_IFNAR_KO_VS_IFNB_KO_CD8_NEG_SPLEEN_DC_UP	GSE12392_IFNAR_KO_VS_IFNB_KO_CD8_NEG_SPLEEN_DC_UP	GSE12392_IFNAR_KO_VS_IFNB_KO_CD8_NEG_SPLEEN_DC_UP	191	0.370576	1.94405	7.73e-05	0.000844536	0.000589738	7429	tags=42%, list=22%, signal=33%	ICAM5/SERTAD2/DEPP1/PER2/RGCC/TOB1/DDX21/DTX1/NPPC/PDGFB/SAV1/SNX16/CLN8/RRN3/CHKA/ATF3/USP12/CTXN1/TRIM36/SP5/ZBTB21/SLC16A6/PIM3/NDEL1/KDM5C/CYP1B1/MAFK/TAGLN2/TNFRSF12A/PARP6/LINC01128/ANKRD28/SHB/SLC38A2/DNAJB9/SLC31A2/ZC3H12C/EPOP/SGK1/ZBTB46/SLC16A3/GOSR1/TMOD3/LGALS3/EIF4A1/DNTTIP1/GFPT1/RAPGEF6/BAG3/ZMIZ1/NAA15/REL/ZBTB1/EHD4/CSGALNACT2/CTTNBP2NL/RGS1/GPCPD1/SRFBP1/LRP12/CYP51A1/PLAUR/COR…
GSE24634_TEFF_VS_TCONV_DAY3_IN_CULTURE_DN	GSE24634_TEFF_VS_TCONV_DAY3_IN_CULTURE_DN	GSE24634_TEFF_VS_TCONV_DAY3_IN_CULTURE_DN	196	0.368696	1.94016	7.89e-05	0.000844536	0.000589738	8191	tags=44%, list=25%, signal=33%	ADM/LTBP2/CDKN1A/KANK1/SPRY2/NRP1/IMPA2/HMOX1/ITGAX/EVI2B/CHST15/EPPK1/TCF7/OPN3/FCN1/CCRL2/LHPP/FGR/NPC1/MCF2L-AS1/PGD/CHMP7/ZNF185/KBTBD11/CCL2/RB1/TLR1/PARP6/PYGL/SORT1/SLC31A2/ATP6AP1/CD1D/LILRB2/VSIG4/CYBB/LILRB4/SQOR/VAMP3/MYOF/COL19A1/TP53I3/BCAP31/SLC11A1/SEPTIN10/CCR1/FHIT/CLEC4A/HLA-DRB6/NCF2/KLF6/ACP2/FKBP15/CLEC4E/APLP2/NCF1C/MX2/SELL/LGALS3BP/KYNU/FGL2/DAB2/TCEAL1/SMCO4/UGGT2/RNH1/SL…
GSE22313_HEALTHY_VS_SLE_MOUSE_CD4_TCELL_UP	GSE22313_HEALTHY_VS_SLE_MOUSE_CD4_TCELL_UP	GSE22313_HEALTHY_VS_SLE_MOUSE_CD4_TCELL_UP	191	0.366252	1.92136	7.73e-05	0.000844536	0.000589738	6675	tags=39%, list=20%, signal=32%	TLE1/PHLDA1/ANKK1/NAGPA/MSC/RGL3/RRP1/RSPH3/ABHD5/SLC22A5/PIM3/PTPRE/FADS3/DMBX1/LZTS2/EBF2/NPC1/DAG1/PLIN2/EFCAB5/SDC2/FTH1P5/CYGB/MFHAS1/GRIN3B/CBS/TTC39B/RARA/PPP1R15B/EMC3/CC2D1B/SEPTIN3/C1orf220/PELI3/RNF24/G6PD/OCRL/SHANK3/MFSD4B/CD44/FAM110B/PARP12/ADAMTSL4/SEPHS2/SVIL/ADRB3/LGALS3/EIF4A1/RNF227/MGAT1/C7orf50/INF2/PPARG/CHST7/ATP6V0A2/BCAR3/CD274/KCNE1/SERINC2/WFS1/LZTS3/LYSMD1/CLN3/RPS2P4…
GSE37532_TREG_VS_TCONV_PPARG_KO_CD4_TCELL_FROM_LN_DN	GSE37532_TREG_VS_TCONV_PPARG_KO_CD4_TCELL_FROM_LN_DN	GSE37532_TREG_VS_TCONV_PPARG_KO_CD4_TCELL_FROM_LN_DN	198	0.363693	1.91555	7.95e-05	0.000844536	0.000589738	7934	tags=44%, list=24%, signal=34%	RRP12/EGR2/DDX21/BABAM2/PUS3/CCDC86/MOB3B/SEMA7A/TWNK/NAPSB/WDR74/MYBBP1A/MRTO4/IFRD2/NCLN/PNO1/DNPEP/ABCE1/RPS6KA1/PES1/CD83/MRRF/TRAP1/CLUH/NOL6/PPAN/RRP15/WSB1/SLC39A1/PAK1IP1/JAM2/RPF2/DIMT1/APEX1/METTL1/SNX9/CERS6/SLC11A2/NDUFAF4/HIVEP3/DHX33/POLR1C/DNAAF5/SCAMP3/PNP/WDR43/NIT2/ETF1/UTP14A/TGFB1/EIF5/PTPN6/TET3/RPL7L1/HSPA5/NOP14/BTG2/CALR/RIOK2/EXOSC5/TPP1/NAMPT/PHB/CD40/MRPL20/WDR3/EGR3/NT…
GSE26343_UNSTIM_VS_LPS_STIM_NFAT5_KO_MACROPHAGE_UP	GSE26343_UNSTIM_VS_LPS_STIM_NFAT5_KO_MACROPHAGE_UP	GSE26343_UNSTIM_VS_LPS_STIM_NFAT5_KO_MACROPHAGE_UP	196	0.362957	1.90996	7.89e-05	0.000844536	0.000589738	7016	tags=42%, list=21%, signal=34%	GEM/EGR2/OCSTAMP/PLK3/TAF4B/UTP15/NR4A3/KLF9/YRDC/KCNQ1OT1/ST6GALNAC4/ACTN1/PROCR/SLC7A1/PIM3/URB2/ABCE1/EDN1/GCLC/ALAS1/HK2/RANBP2/UTP18/RIOX2/UBQLN4/PPAT/TNFAIP8L1/LSS/OTUD4/STON2/NSUN2/ARHGAP31/SLC17A9/RARA/EIF3B/PXDC1/RSL1D1/EML4/STARD4/RNF24/MRPS18B/HECTD1/SPINT1/NDUFAF4/SERPINB2/HIVEP3/BRIX1/UTP23/PNP/NFKBIE/RARS1/ZNF202/HEMK1/HSPA8/PMPCA/S100A6/MAP2K4/NOL8/MYO1E/MET/CDH1/CMTM6/USP10/MFSD2A…
GSE25088_ROSIGLITAZONE_VS_IL4_AND_ROSIGLITAZONE_STIM_STAT6_KO_MACROPHAGE_DAY10_DN	GSE25088_ROSIGLITAZONE_VS_IL4_AND_ROSIGLITAZONE_STIM_STAT6_KO_MACROPHAGE_DAY10_DN	GSE25088_ROSIGLITAZONE_VS_IL4_AND_ROSIGLITAZONE_STIM_STAT6_KO_MACROPHAGE_DAY10_DN	197	0.362076	1.9054	7.94e-05	0.000844536	0.000589738	6176	tags=38%, list=18%, signal=31%	CFB/LONRF1/SPHK1/MOB3B/HLA-DOB/NR4A3/RRN3/UBQLN1/TXNRD1/CYSTM1/ILRUN/PROCR/TWSG1/ABCC1/MCEMP1/IL1RN/IL1A/TXN/RAB1A/BCL2A1/COX20/YWHAG/LIMS1/MTF1/ADAM17/ARHGAP31/ATP13A3/TGM2/PHACTR2/CD209/FNIP2/EBNA1BP2/TOLLIP/NRIP3/PITPNA/HPN/SQOR/B3GNT5/SLPI/PARP12/PSMA1/SEPHS2/MAT2A/LAMB3/EIF4A1/MGAT1/TUFM/SNX8/CXCL16/FLVCR2/RIOX1/MRNIP/PDIA4/CLEC4E/CD53/CALU/CD1E/CCDC93/HSPA5/GSTO1/CD63/RALA/SLC2A13/KYNU/CALR…
GSE12366_NAIVE_VS_MEMORY_BCELL_UP	GSE12366_NAIVE_VS_MEMORY_BCELL_UP	GSE12366_NAIVE_VS_MEMORY_BCELL_UP	184	0.364936	1.90482	7.48e-05	0.000844536	0.000589738	5800	tags=34%, list=17%, signal=28%	TCL1A/IGLV6-57/XIRP1/NIBAN3/PNPLA7/MIR600HG/PPARD/ABCB4/MEGF6/DTX1/TRMT61A/LINC00926/FCER2/ZNF488/PCDH9/PCDH12/FCRL1/LIMS2/C16orf74/DUSP6/TSPAN13/PTPRE/EDN1/CD83/FPGS/CD200/TRIM17/CD79B/KBTBD11/WFDC21P/DEF8/TREML2/SH3BP2/TTC39B/ZNF629/CD1A/OGFRL1/SWT1/PELI3/TRAK1/GALNT6/CRY1/MYADM/MCF2L/LARS1/RAPGEF6/FNBP4/EHD4/APLP2/ENC1/NCF1C/RABEP2/FNBP1L/ZNF418/DNASE1L3/LYL1/DPP6/ATP6V0A1/GAS2L1/TCL1B/MROH6/N…
GSE42088_UNINF_VS_LEISHMANIA_INF_DC_24H_DN	GSE42088_UNINF_VS_LEISHMANIA_INF_DC_24H_DN	GSE42088_UNINF_VS_LEISHMANIA_INF_DC_24H_DN	197	0.358419	1.88616	7.94e-05	0.000844536	0.000589738	4885	tags=34%, list=15%, signal=29%	CCL24/MSC/SNX16/CLGN/TTC4/FSCN1/HPD/MMP10/ZSWIM1/TXNRD1/USP12/CXCL5/RRP1/YRDC/TRIM36/MRTO4/IFRD2/PNO1/DPH2/TRIP6/TWSG1/EDN1/RTN2/ACSL4/CDK14/ACOX3/PGM3/TXN/RPAP1/PDSS1/NSUN3/LSS/VCP/PRR16/TRIM16/VASP/PCID2/NOP16/ALCAM/ZNF629/GDI1/ANXA5/ANKRD40/JAKMIP2/NPTN/METTL1/CYP27B1/SLC11A2/CLIC4/ATP6V1H/MTHFD2L/SLAMF7/SEPTIN10/INHBA/CD44/GLRX3/LIG3/PEX10/HLX/STAM2/PAICS/NRBP1/PDE4DIP/SPINK1/CRIM1/BYSL/MYO1E
GSE45739_UNSTIM_VS_ACD3_ACD28_STIM_WT_CD4_TCELL_UP	GSE45739_UNSTIM_VS_ACD3_ACD28_STIM_WT_CD4_TCELL_UP	GSE45739_UNSTIM_VS_ACD3_ACD28_STIM_WT_CD4_TCELL_UP	194	0.358094	1.88297	7.8e-05	0.000844536	0.000589738	5762	tags=35%, list=17%, signal=29%	CRYAB/AQP3/MEOX1/MEGF6/ANKRD55/TAF4B/DACT1/TBC1D4/WDR73/ALS2CL/LIMS2/ADTRP/ACVR1/C2CD2L/PPEF2/SLC6A12/PLCL1/SLC8B1/TSEN2/FAM13A/EDAR/EPPK1/DDR1/EPHX2/VIPR1/LEF1/PFN2/CHMP7/KBTBD11/GABBR1/KLF7/MORC4/EPHB6/IL6R/CCR7/PDE8A/TRAF3IP2/BSDC1/MSRA/OCRL/GNAQ/TIAM1/PLAC4/FHIT/CACNA1G/GPRASP1/MINDY1/MCF2L/CLN5/BAG3/INF2/SEMA3G/MAP3K3/PDE4DIP/NETO2/IL7R/FAM102A/ADGRE1/C6orf120/SELL/LGALS3BP/ACVR2A/SULT1B1/C1…
GSE20754_WT_VS_TCF1_KO_MEMORY_CD8_TCELL_UP	GSE20754_WT_VS_TCF1_KO_MEMORY_CD8_TCELL_UP	GSE20754_WT_VS_TCF1_KO_MEMORY_CD8_TCELL_UP	198	0.357011	1.88035	7.95e-05	0.000844536	0.000589738	8233	tags=44%, list=25%, signal=33%	ADM/RHOF/EGR2/PDGFB/ADNP2/NDRG1/CCDC86/NR4A3/WBP2/MAP4K4/ATF3/ZNF622/DPH2/ZBTB21/SLC7A1/PIM3/HLA-B/KLF16/IL1A/CLDN12/ABL2/TMEM43/SRC/SQSTM1/KLHL26/RAB1A/ZNF330/MAFK/ADAM17/KLF7/ERCC1/MRPS30/KCMF1/SURF6/YJU2/JAM2/ANXA5/OVGP1/COQ10B/RNF24/PPP1R13B/FAM83H/LAMTOR3/RTN4/CD44/AFF4/TOM1/RPF1/ETF1/SOWAHC/KLF6/KMT5B/FNDC3A/PIP4K2C/FGF18/GLIPR1/RAB20/SUPT4H1/LZTS3/XPOT/CD40/SYCE3/TAX1BP1/TNIP1/GNA13/EPHA2/…
GSE3982_MAC_VS_CENT_MEMORY_CD4_TCELL_UP	GSE3982_MAC_VS_CENT_MEMORY_CD4_TCELL_UP	GSE3982_MAC_VS_CENT_MEMORY_CD4_TCELL_UP	199	0.355032	1.87022	7.98e-05	0.000844536	0.000589738	8171	tags=49%, list=24%, signal=37%	SCG5/MIR22HG/RCBTB2/AHCYL1/CSF1/CHKA/TXNRD1/CXCL5/TACSTD2/CCDC47/TSC22D1/SLC7A8/ITGAX/QPCT/ACSL3/RTN1/RGS20/AMD1/FBXO38/CD83/BACH1/VDR/PROC/VCP/CDA/TNFRSF12A/ERCC1/SIDT2/LASP1/SLC38A2/SLC39A1/KIF1B/SLC43A3/PXDC1/LILRB1/ESR1/ATP6AP1/MBD4/KCNJ1/MATK/GABARAP/CEP170/VAC14/SQOR/PIK3CB/MYL9/ACO1/PNP/INHBA/GLRX3/CD52/CHUK/SIRPA/EIF4A1/AP4S1/SH3BGRL3/ACP2/TMEM53/APLP2/NACC2/CYP51A1/SEL1L/RPN1/GNA12/STXBP…
GSE24634_TREG_VS_TCONV_POST_DAY5_IL4_CONVERSION_DN	GSE24634_TREG_VS_TCONV_POST_DAY5_IL4_CONVERSION_DN	GSE24634_TREG_VS_TCONV_POST_DAY5_IL4_CONVERSION_DN	197	0.355214	1.86929	7.94e-05	0.000844536	0.000589738	8044	tags=46%, list=24%, signal=35%	LIMCH1/CDKN1A/BCL6/KAT8/DACT1/FSCN1/SCML1/C1orf54/LAMP3/TSC22D1/SLC8B1/C1S/PTPRE/RTN1/LDLRAP1/CD83/MTERF4/SQSTM1/IL1R2/RYK/CCL2/ARAP1/TLR1/PLXNB2/PIP5K1C/SRSF5/IL6R/ZNF629/CD209/CTNNA1/SLC31A2/ATP6AP1/ENG/PLOD3/CYBB/GABARAP/ST3GAL5/SLC11A2/VAMP3/CREG1/CCR1/LRP10/CCL22/PINK1/CSF1R/SIRPA/MINDY1/TYROBP/LGALS3/SLC2A6/MGAT1/TP73-AS1/HLX/ACP2/ARHGAP12/TBC1D1/RHOQ/KLHL3/ATP8A2/NCF1C/MX2/RAB20/RNF130/COQ…
GSE37605_FOXP3_FUSION_GFP_VS_IRES_GFP_TREG_C57BL6_UP	GSE37605_FOXP3_FUSION_GFP_VS_IRES_GFP_TREG_C57BL6_UP	GSE37605_FOXP3_FUSION_GFP_VS_IRES_GFP_TREG_C57BL6_UP	180	0.359018	1.8677	7.37e-05	0.000844536	0.000589738	2804	tags=23%, list=8%, signal=21%	SLC25A25/JUP/GEM/ADM/HOMER1/EGR2/CCL24/TNS2/PLK3/AKAP12/NUAK2/TMCC3/NR4A3/SPRY2/SERPINE1/ATF3/DUSP6/UXS1/NAV3/RASGEF1B/ZFYVE9/SLC25A33/CHST15/SLC24A3/EDN1/HBEGF/INPPL1/IL1A/PTGS2/CCRL2/MT1A/CCL2/TGFB1I1/TRIM25/MFHAS1/KLHDC10/ACO2/PVR/ESAM/SELENON/MRM3
GSE3982_MAC_VS_BASOPHIL_UP	GSE3982_MAC_VS_BASOPHIL_UP	GSE3982_MAC_VS_BASOPHIL_UP	195	0.35278	1.85606	7.84e-05	0.000844536	0.000589738	7536	tags=39%, list=23%, signal=31%	AQP3/PPARD/SCG5/OLR1/NSMAF/TCIRG1/SCML1/LINC00963/MYO1C/MAP2K3/TSC22D1/SLC6A12/CSPG4/ACSL3/RTN1/FCN1/GFOD1/VASP/SIDT2/ESF1/AMPD2/PHACTR2/SPSB1/DOCK3/NRBF2/MAP4K3/RET/IBTK/CACNA1H/MATK/MTRR/CAPN11/CREG1/EBAG9/NARS1/GNA11/EEF1AKMT3/GLRX3/MCF2L/MYOZ1/CD101/NDUFA5/GSN/GFPT1/EMC1/TP73-AS1/TOMM40/EVI2A/HDHD5/PGRMC1/CHSY1/CD164/MRPL4/DOP1B/TRAF3/PPP2R3A/LTBR/FASTKD1/OGDH/ITPKB/ABCC3/ENO1/DCTPP1/TNFRSF1B…
GSE17974_0.5H_VS_72H_UNTREATED_IN_VITRO_CD4_TCELL_UP	GSE17974_0.5H_VS_72H_UNTREATED_IN_VITRO_CD4_TCELL_UP	GSE17974_0.5H_VS_72H_UNTREATED_IN_VITRO_CD4_TCELL_UP	190	0.352787	1.84921	7.71e-05	0.000844536	0.000589738	6458	tags=33%, list=19%, signal=27%	RBM19/EGR2/IL1B/DDX21/ADNP2/NAGPA/UTP15/MIR22HG/SLC25A32/SIRT7/ANXA1/SCML1/RNF157-AS1/TSC1/ALG13/SF1/DDX19B/SLC25A33/PXN/EDN1/IKZF5/CD83/BACH1/SRSF6/CLUH/RYK/LTV1/AKAP1/GABBR1/NOL6/ARHGAP21/RRP15/FAM200B/LEF1-AS1/RBSN/DNAJB9/ZHX1/TCTA/SLC11A2/POLR1C/LMTK2/FCMR/IQSEC1/SLC22A23/VPS18/CXCL16/EIF5/TIMM23/SORBS3/SIK1/GPCPD1/SERINC5/ELOA/BTG2/DYRK2/QTRT2/NUFIP1/C6orf58/ATG14/EGR3/KDM6A/IRS2/TMEM68
GSE25123_CTRL_VS_ROSIGLITAZONE_STIM_PPARG_KO_MACROPHAGE_UP	GSE25123_CTRL_VS_ROSIGLITAZONE_STIM_PPARG_KO_MACROPHAGE_UP	GSE25123_CTRL_VS_ROSIGLITAZONE_STIM_PPARG_KO_MACROPHAGE_UP	192	0.351242	1.84348	7.78e-05	0.000844536	0.000589738	5714	tags=39%, list=17%, signal=33%	LINC00937/PHLDA1/IL1B/DDX21/OLR1/GRK6/CD1B/CXCL5/KCNN4/VPS37C/MAP2K3/EREG/LONRF3/ITGAX/CREB5/SLC16A6/PTPRE/IGF2BP2/NDEL1/MCEMP1/IL1RN/OPN3/FCN1/CCRL2/DHRS9/FGR/ZNF697/DOCK5/LGALS2/KBTBD11/BCL2A1/PLIN2/FTH1P5/TAGLN2/GABBR1/GPAT3/MMP19/AMPD2/ITPRIP/JAKMIP2/ARL8B/CD1D/PFKFB4/MGAM/NRIP3/AQP9/LYZ/CST6/SLAMF7/EDEM1/SGMS2/CD52/ETF1/PGAM1/SLC25A37/ZMIZ1/FRY/PPARG/NRGN/PRAM1/CD1C/CLEC4E/CSGALNACT2/SIK1/FL…
GSE29618_MONOCYTE_VS_MDC_UP	GSE29618_MONOCYTE_VS_MDC_UP	GSE29618_MONOCYTE_VS_MDC_UP	198	0.349868	1.84273	7.95e-05	0.000844536	0.000589738	9786	tags=56%, list=29%, signal=40%	ADM/EGR2/TCF7L2/MIR22HG/RCBTB2/GRK6/MAP4K4/VPS37C/DUSP6/HMOX1/ABHD5/QPCT/CHST15/LILRA2/CFD/HLA-B/FCN1/FGR/BACH1/PGD/BCL2A1/TKT/CYP1B1/MPO/ITGAM/CDA/KLF7/MBD2/PYGL/LILRB1/SDCBP/SLC31A2/KIAA0513/CYBB/SLC11A1/TIAM1/CREG1/CCR1/CD44/LILRB3/NCF2/BEST1/TYROBP/VCAN/FRY/IRAK3/CXCL8/FUT4/EVI2A/APLP2/NCF1C/ADGRE1/CD63/IGF2R/NACC2/BTG2/MTARC1/NAMPT/C5AR1/TMEM127/CPD/RIT1/LAMP1/PDXK/CTSL/RTN3/TNFRSF1B/IRS2/RB…
GSE36888_UNTREATED_VS_IL2_TREATED_STAT5_AB_KNOCKIN_TCELL_2H_UP	GSE36888_UNTREATED_VS_IL2_TREATED_STAT5_AB_KNOCKIN_TCELL_2H_UP	GSE36888_UNTREATED_VS_IL2_TREATED_STAT5_AB_KNOCKIN_TCELL_2H_UP	197	0.350139	1.84258	7.94e-05	0.000844536	0.000589738	5395	tags=36%, list=16%, signal=30%	ADM/PLK3/IL1B/BX255923.2/BCL6/MIR22HG/TTLL4/GLIS3/NRP1/SLC7A11/MSANTD3/CXCL5/KCNN4/SPRED2/CYSTM1/PROCR/SLC16A6/IL1A/TXN/ASAP1/PTPN12/TP53BP2/VDR/WFDC21P/CCL2/MTF1/TMEM45B/AC093583.1/PVR/SLC41A2/LILRB1/PPM1N/FTH1/TRIM13/ELOVL7/TRAF3IP2/ACVR1B/DGAT2/ARMT1/CYP27B1/SPRED1/DGKH/PNP/SIGLEC16/NFE2L1/SOWAHC/PKM/NCF2/LAMB3/MAML2/AMPD3/TMEM115/TNF/KLHL2/SMURF1/CXCL8/FUT4/ALDOA/TBC1D30/NETO2/PACSIN2/CD274/M…
GSE6269_FLU_VS_STAPH_AUREUS_INF_PBMC_DN	GSE6269_FLU_VS_STAPH_AUREUS_INF_PBMC_DN	GSE6269_FLU_VS_STAPH_AUREUS_INF_PBMC_DN	164	0.356241	1.83064	6.77e-05	0.000844536	0.000589738	9673	tags=56%, list=29%, signal=40%	ADM/CDKN1A/TIMP1/MIR22HG/FSCN1/IMPA2/QPCT/CREB5/ABCC6/RTN2/ZFAND5/IL1RN/FCN1/PGD/SEMA6B/RAB1A/TKT/SORT1/PLIN3/KLF10/SDCBP/FTH1/TOLLIP/PHC2/LYZ/VIM/VAMP3/SLC11A1/CREG1/SPI1/TOM1/LILRA4/SIRPA/ANPEP/VCAN/DSE/LGALS3/FLVCR2/FUT4/APLP2/MICAL2/CD63/ELOA/RIOK3/ARF1/RAB20/SLC15A3/RHOA/IL1RAP/PLAUR/CPD/RNF130/TIMP2/LEPROT/PLEK/CLEC7A/GNG10/TFEC/LAPTM4A/RXRA/ADIPOR1/ADAM9/FADS1/SIRPAP1/ZDHHC3/RAB5IF/ZYX/EMI…
GSE46242_TH1_VS_ANERGIC_TH1_CD4_TCELL_WITH_EGR2_DELETED_UP	GSE46242_TH1_VS_ANERGIC_TH1_CD4_TCELL_WITH_EGR2_DELETED_UP	GSE46242_TH1_VS_ANERGIC_TH1_CD4_TCELL_WITH_EGR2_DELETED_UP	194	0.347235	1.82587	7.8e-05	0.000844536	0.000589738	6173	tags=36%, list=18%, signal=29%	LIMCH1/RFLNB/RGCC/CDKN1A/IGFBP6/ABCB4/PDGFB/TTLL4/MAP11/GATD3A/FSCN1/CA2/LAMP3/BTLA/C2CD2L/CHCHD4/TMX2/CHST15/S1PR2/CD83/NRIP1/DOCK5/RGS12/GFOD1/CCL2/BPI/FAM107B/HYOU1/ICOSLG/PIP5K1C/CCR7/SLC36A4/SLC20A2/CCT2/FAM20C/CD1D/TMEM121B/COQ10B/CYBB/CYP27B1/DPY19L3/C18orf32/CCDC71L/HTR7P1/MYADM/SPG21/ITPRIPL2/ACVRL1/C11orf1/AMPD3/CYP7A1/ALKBH3/TBC1D1/CD274/ELOC/RGS1/FLT3/VOPP1/STX18/DOP1B/RAB20/ST20/EIF1…
GSE22886_DC_VS_MONOCYTE_UP	GSE22886_DC_VS_MONOCYTE_UP	GSE22886_DC_VS_MONOCYTE_UP	200	0.346131	1.82471	8e-05	0.000844536	0.000589738	8663	tags=47%, list=26%, signal=35%	ZCCHC2/HOMER1/MICALL2/FILIP1L/NAGPA/FCER2/SLC6A8/CD1B/HMG20B/CHKA/MFSD12/C1orf54/DAGLA/AVPI1/JAG1/TRIP6/RAP1GAP/TWSG1/STAC/ZNF804A/SLC27A3/SDC2/TAX1BP3/SLC16A1/APOO/ACO2/ANXA11/DOCK3/MLYCD/CD209/PXDC1/CD1A/PEA15/GLRX2/COLEC12/SPINT1/STARD7/ILVBL/GPX3/MYL9/LPP/CCL22/RASAL2/NIT2/SEPHS2/ABR/HSD11B1/GSN/FLVCR2/PI4K2A/RASGRP3/ADORA3/EHD4/BCAR3/CD1E/MYO1E/LMNA/LARP4/SPTAN1/A2M/CALR/DAB2/FABP5/RASAL1/EC…
GSE29618_BCELL_VS_MDC_DAY7_FLU_VACCINE_UP	GSE29618_BCELL_VS_MDC_DAY7_FLU_VACCINE_UP	GSE29618_BCELL_VS_MDC_DAY7_FLU_VACCINE_UP	190	0.347959	1.8239	7.71e-05	0.000844536	0.000589738	3803	tags=25%, list=11%, signal=23%	CXCR5/TCL1A/CD79A/AQP3/VPREB3/FCRL2/IGHG1/RUBCNL/CD19/ARHGAP24/IGKC/FCER2/POU2AF1/PCDH9/PLCG2/BLK/MAP4K4/PNOC/PAX5/TCF4/PIP5K1B/IGKV3-20/PKIG/COBLL1/IGKV1D-13/CDK14/MS4A1/CD83/ADD2/BANK1/CD200/ST6GAL1/CHMP7/CD79B/NT5E/SPON1/ADAM28/PIKFYVE/SYPL1/ZBED5/ODC1/MBD4/IGLV1-44/IGLL3P/ARHGEF18/WASF1/IGKV4-1/FCMR
GSE5589_LPS_VS_LPS_AND_IL6_STIM_MACROPHAGE_45MIN_DN	GSE5589_LPS_VS_LPS_AND_IL6_STIM_MACROPHAGE_45MIN_DN	GSE5589_LPS_VS_LPS_AND_IL6_STIM_MACROPHAGE_45MIN_DN	196	0.345784	1.8196	7.89e-05	0.000844536	0.000589738	7961	tags=42%, list=24%, signal=32%	PLK3/ZPR1/PWP2/SMYD5/DNAJA3/HMG20B/ZSWIM1/STIP1/SLC7A1/IL17RC/MGAT4B/IL1A/ANGPTL4/ZNF697/UTP18/RIOX2/DHX15/GRWD1/DYNC1LI1/ITGB3/TAGLN2/NSUN2/TAX1BP3/VAMP4/ESF1/CIAO2A/PCYT1A/EIF3B/RIMS3/UGDH/PLIN3/CMAS/APEX1/GLRX2/MRPS18B/HSD3B7/MCRIP2/CLIC4/ATP6V1H/SCAMP3/EBAG9/AIMP2/STRAP/MMGT1/LARP4B/VKORC1L1/SMURF1/SIGMAR1/VWA8/STARD3/MIEF1/GSTO1/ATP8A2/WDR12/M6PR/GFM1/SLC39A6/RAD23B/BRS3/EIF2S1/GTF2H3/NKRF/R…
GSE5589_UNSTIM_VS_45MIN_LPS_AND_IL6_STIM_MACROPHAGE_DN	GSE5589_UNSTIM_VS_45MIN_LPS_AND_IL6_STIM_MACROPHAGE_DN	GSE5589_UNSTIM_VS_45MIN_LPS_AND_IL6_STIM_MACROPHAGE_DN	193	0.345547	1.81493	7.8e-05	0.000844536	0.000589738	7108	tags=36%, list=21%, signal=28%	RRP12/DDX31/DDX21/SPHK1/PWP2/DNAJA3/AHCYL1/HMG20B/ZSWIM1/ACTN1/IL17RC/MGAT4B/ZFAND5/CDK20/GPATCH4/ZNF697/UTP18/PI4KA/CHMP7/PLIN2/DYNC1LI1/PDGFA/ESF1/MPDU1/SLC41A2/TMEM217/UGDH/VPS53/HSD3B7/FBXO32/RNF4/MINDY1/TSPAN3/MMGT1/NR1H3/IFT43/LARP4B/SEC63/CLBA1/REL/VKORC1L1/NAA50/NAA35/S100A6/BTBD3/ATP6V0A2/EPN2/PDXDC1/GFM1/SLC39A6/ITPR1/FGD6/RAD23B/GTF2H3/MRPL20/RNH1/PHOSPHO1/PSMC3/KIF5B/PHLDA3/PLEKHO2/FP…
GSE44955_MCSF_VS_MCSF_AND_IL27_STIM_MACROPHAGE_UP	GSE44955_MCSF_VS_MCSF_AND_IL27_STIM_MACROPHAGE_UP	GSE44955_MCSF_VS_MCSF_AND_IL27_STIM_MACROPHAGE_UP	195	0.34445	1.81223	7.84e-05	0.000844536	0.000589738	5732	tags=34%, list=17%, signal=28%	DSP/THEM4/TIE1/RFLNB/CDKN1A/IL1B/PDGFB/OLR1/TIMP1/TMCC3/TTLL4/CHCHD4/CHST15/TSPAN13/ATP6V1G1/FGR/TMEM52B/NRIP1/DOCK5/MRAS/RGS12/GFOD1/ZMYND15/CCL2/BPI/CD300LB/ST20-AS1/TAGLN2/SIPA1L2/STON2/TGM2/HYOU1/TBL2/SLC36A4/CCT2/MAN1A1/FAM20C/EML4/CD1D/NRIP3/METTL1/CYBB/SMIM20/DPY19L3/ABHD2/AIMP2/ATP6V1E1/RND3/C11orf1/AMPD3/HLA-DPB2/SDSL/RNASEK/TBC1D1/FKBP15/PRAM1/APLP2/ELOC/CASTOR3/STX18/FILNC1/RAB20/ST20/…
GSE29618_BCELL_VS_MONOCYTE_DAY7_FLU_VACCINE_UP	GSE29618_BCELL_VS_MONOCYTE_DAY7_FLU_VACCINE_UP	GSE29618_BCELL_VS_MONOCYTE_DAY7_FLU_VACCINE_UP	193	0.344733	1.81065	7.8e-05	0.000844536	0.000589738	3803	tags=26%, list=11%, signal=23%	TCL1A/CD79A/AQP3/VPREB3/FCRL2/TLE1/RUBCNL/E2F5/CD19/ABCB4/IGKC/SAV1/FCER2/POU2AF1/HLA-DOB/PCDH9/PLCG2/BLK/RPL9/PNOC/PAX5/GNG7/IGKV3-20/ZNF430/PKIG/TSPAN13/COBLL1/IGKV1D-13/BCL7A/CDK14/MS4A1/DENND5B/BANK1/CD200/CHMP7/CD79B/NT5E/IGHD/ADAM28/QRSL1/RABEP1/SYPL1/ODC1/MBD4/IGLV1-44/IGLL3P/ARHGEF18/PRDM4/IGKV4-1/FCMR
GSE36888_STAT5_AB_KNOCKIN_VS_WT_TCELL_IL2_TREATED_17H_DN	GSE36888_STAT5_AB_KNOCKIN_VS_WT_TCELL_IL2_TREATED_17H_DN	GSE36888_STAT5_AB_KNOCKIN_VS_WT_TCELL_IL2_TREATED_17H_DN	193	0.344175	1.80772	7.8e-05	0.000844536	0.000589738	7527	tags=44%, list=23%, signal=34%	RRP12/PLPPR2/EGR2/TCF7L2/MSRB1/CRADD/MAP4K4/ACVR1/DUSP6/UXS1/EREG/ACTN1/EVI2B/CHST15/CLIP1/CFD/CPEB4/ATP6V1G1/PTGS2/FCN1/BACH1/TMEM91/MPO/ST20-AS1/ITGAM/PYGL/SLC43A3/NTSR1/OGFRL1/AP5B1/MTX1/SLC31A2/FTH1/ARL8B/HVCN1/ARID3A/CLIC4/B3GNT5/SPG21/NARS1/SGMS2/PINK1/SPART/MMGT1/TYROBP/PAK2/ARL11/KIAA0232/FRY/HLX/IRAK3/EVI2A/LINC00968/RHOQ/ANO5/KCNE1/NCF1C/PLXDC2/EVI5/PDLIM7/RIOK3/BLOC1S3/CATSPER1/CPD/LAM…
GSE22886_TCELL_VS_BCELL_NAIVE_DN	GSE22886_TCELL_VS_BCELL_NAIVE_DN	GSE22886_TCELL_VS_BCELL_NAIVE_DN	184	0.346001	1.80598	7.48e-05	0.000844536	0.000589738	3318	tags=24%, list=10%, signal=22%	LARGE1/TCL1A/CD79A/DSP/VPREB3/FCRL2/CRHR2/RUBCNL/MIR600HG/ZNF747/CD19/TAF4B/CORO2B/HLA-DOB/PLCG2/HDAC9/UTP25/PNOC/SPIB/TCF4/PIP5K1B/PKIG/TSPAN13/DDR1/COBLL1/FADS3/BCL7A/CDK14/MS4A1/BANK1/CD200/SLC9A7/RAB30/CD79B/MYOZ3/TULP2/TREML2/SOGA1/RHPN1-AS1/PEG10/CD1D/DNMBP/COLEC12/GTPBP3
GSE4748_CYANOBACTERIUM_LPSLIKE_VS_LPS_AND_CYANOBACTERIUM_LPSLIKE_STIM_DC_3H_UP	GSE4748_CYANOBACTERIUM_LPSLIKE_VS_LPS_AND_CYANOBACTERIUM_LPSLIKE_STIM_DC_3H_UP	GSE4748_CYANOBACTERIUM_LPSLIKE_VS_LPS_AND_CYANOBACTERIUM_LPSLIKE_STIM_DC_3H_UP	192	0.344027	1.80561	7.78e-05	0.000844536	0.000589738	3803	tags=30%, list=11%, signal=27%	CXCR5/CD79A/NIBAN3/AFF3/THEM4/ENPP2/MIR600HG/IGHV5-78/MEOX1/ABCB4/FCRLA/DTX1/IGKC/KBTBD8/FCER2/FCRL5/CORO2B/HLA-DOB/PCDH9/BLK/UFM1/FCRL1/PNOC/FANK1/PAX5/WDR74/SPIB/DENND2D/BTLA/IGKV3-20/TSPAN13/IGKV1D-13/CD83/ADO/BANK1/CD200/CD79B/NOC3L/TNFRSF17/IGHD/EBF1/QRSL1/NIP7/IGLV3-19/MRPS35/IGLV1-44/NCL/SERPINB9P1/SNX9/WDR4/IGLL3P/TAPT1/POLR1C/WASF1/AIMP2/CXXC5/IGKV4-1/FCMR
GSE37301_COMMON_LYMPHOID_PROGENITOR_VS_CD4_TCELL_UP	GSE37301_COMMON_LYMPHOID_PROGENITOR_VS_CD4_TCELL_UP	GSE37301_COMMON_LYMPHOID_PROGENITOR_VS_CD4_TCELL_UP	192	0.343524	1.80297	7.78e-05	0.000844536	0.000589738	7536	tags=39%, list=23%, signal=30%	CRYM/DDX21/TGIF2/LGI2/CLCN7/UFM1/AHCYL1/SLC6A8/RASIP1/FUT5/UXS1/CHML/DNPEP/DPH2/IL17RC/ABCE1/RANBP2/RIOX2/CCND1/PDCD11/CLUH/RAB1A/TSNAXIP1/NIP7/EEF1AKNMT/PCID2/URB1/TVP23B/FAM131A/ZFR/KLF10/DNAJB9/SDCBP/COQ10B/WDR4/MTRR/SGK1/UTP11/INHBA/CD44/GOSR1/CCL22/LRRK1/ADRB3/AKAP8/UTP14A/PGAM1/EVC/PAICS/VCL/PITX1/DCLK2/SYNCRIP/KLHL21/NDST1/RGS1/SERINC5/BTG2/C5AR1/CUBN/PHB/BCLAF1/NT5DC3/PNPO/LRRFIP1/DDX51/T…
GSE26343_UNSTIM_VS_LPS_STIM_MACROPHAGE_UP	GSE26343_UNSTIM_VS_LPS_STIM_MACROPHAGE_UP	GSE26343_UNSTIM_VS_LPS_STIM_MACROPHAGE_UP	199	0.342241	1.80284	7.98e-05	0.000844536	0.000589738	5680	tags=34%, list=17%, signal=29%	SERTAD2/OCSTAMP/RAI14/PWP2/CACNB2/CCDC86/SEMA7A/SLC7A11/TXNRD1/IFRD2/DUSP6/ST6GALNAC4/PNO1/RASGEF1B/QPCT/ACTN1/PROCR/CLDN3/IL1RN/OPN3/CD83/PTGS2/ASAP1/PUS7/GPATCH4/TOR1AIP2/PUS1/NSUN2/NOL6/RRP15/NOC2L/LASP1/CTDNEP1/CD209/ALDH1B1/PXDC1/EIF6/RSL1D1/EML4/EMG1/APEX1/ELOVL7/MMP13/RNF24/EMP1/UTP4/HIVEP3/PSMB7/TIAM1/INHBA/MCF2L/MAT2A/VCAN/TGFB1/HSPA8/S100A6/CSF2/FNDC3A/BCAR3/PLXDC2/RGS1/CDH1/CMTM6/CCDC3…
GSE10325_BCELL_VS_MYELOID_UP	GSE10325_BCELL_VS_MYELOID_UP	GSE10325_BCELL_VS_MYELOID_UP	195	0.341777	1.79817	7.84e-05	0.000844536	0.000589738	2619	tags=22%, list=8%, signal=20%	LARGE1/CXCR5/TCL1A/CD79A/DSP/VPREB3/FCRL2/TLE1/NFX1/CD27/CD19/ABCB4/IGKC/CR2/FCER2/POU2AF1/HLA-DOB/PCDH9/PNOC/LIMS2/PAX5/WDR74/SPIB/GNG7/EHD3/MAPK13/PKIG/TSPAN13/IGKV1D-13/BCL7A/MS4A1/BANK1/CD200/ST6GAL1/IARS1/CD79B/IGHD/RABGEF1/UBIAD1/QRSL1/GLS/CCR7/TCTN1
GSE5542_UNTREATED_VS_IFNA_TREATED_EPITHELIAL_CELLS_24H_DN	GSE5542_UNTREATED_VS_IFNA_TREATED_EPITHELIAL_CELLS_24H_DN	GSE5542_UNTREATED_VS_IFNA_TREATED_EPITHELIAL_CELLS_24H_DN	195	0.341079	1.79449	7.84e-05	0.000844536	0.000589738	6375	tags=32%, list=19%, signal=26%	CD79A/E2F5/TNFRSF10D/NOG/MMP28/TOP1MT/SELP/WDR73/DENND2D/KCNN4/EFCAB13/CHML/SPPL2B/SLC7A8/TSEN2/DPH6/PPP1R2P1/EDAR/FAM117B/EPHX2/EARS2/LDLRAP1/MORC2/MRRF/MEF2A/CHMP7/KLF3-AS1/GABBR1/ZNF84/RASA3/ANGEL1/TCEA3/IL6R/PRKAR1B/FNIP2/SEH1L/REXO4/GTPBP3/LMLN/KRT73/RMDN2/FUNDC2/FHIT/MINDY1/MAML2/C8orf37/SLC25A37/CRTC3/PTPN6/FARSB/PAICS/KLHL3/N6AMT1/KRT72/CCDC102B/ZNF397/ITPKB/FAM120B/COX4I1/DENND11/C1QBP/A…
GSE10325_BCELL_VS_MYELOID_DN	GSE10325_BCELL_VS_MYELOID_DN	GSE10325_BCELL_VS_MYELOID_DN	199	0.338448	1.78286	7.98e-05	0.000844536	0.000589738	9709	tags=54%, list=29%, signal=38%	ADM/TCF7L2/MYCL/MSRB1/IMPA2/FAR2/VPS37C/DUSP6/C2CD2L/HMOX1/QPCT/LILRA2/PTPRE/CFD/IL1RN/HBEGF/LST1/DHRS9/CARD9/SLC27A3/LGALS2/TKT/CYP1B1/FTH1P5/CDA/CAMK1/ADGRE2/PLXNB2/SLC43A3/CCDC88A/ANXA5/TNFRSF8/SLC31A2/LILRB2/AQP9/PHC2/KIAA0513/SLC11A1/CCR1/LMO2/CSF1R/CLEC4A/SIRPA/LILRB3/NCF2/SH2B3/LGALS3/PGAM1/TNFRSF10C/MICAL2/ADGRE1/LILRA1/NACC2/FGL2/FBP1/C5AR1/ICAM4/SMCO4/PLAUR/CPD/RNF130/CEBPA/FOS/CTSL/RTN…
GSE2770_IL12_AND_TGFB_VS_IL4_TREATED_ACT_CD4_TCELL_2H_UP	GSE2770_IL12_AND_TGFB_VS_IL4_TREATED_ACT_CD4_TCELL_2H_UP	GSE2770_IL12_AND_TGFB_VS_IL4_TREATED_ACT_CD4_TCELL_2H_UP	196	0.338016	1.77871	7.89e-05	0.000844536	0.000589738	6026	tags=36%, list=18%, signal=29%	VPS9D1/CDKN1A/IL1B/SPHK1/SAV1/PUS3/CLCN7/RHOC/KCNN4/PPP1R11/TSC22D1/SPAG9/PPRC1/HLA-B/FADS3/IL1A/ZNF701/CCRL2/HK2/STARD8/NPC1/SRC/TRIO/TINAGL1/VCP/CAMSAP2/PTGR1/ARHGAP31/PSMD14/EML4/PEA15/AP3D1/METTL1/SNX9/SQOR/INO80C/SERPINB2/SUSD6/LRP10/SIRPA/LIG3/NANS/C1orf122/AMPD3/BAG3/HSPA8/CRIM1/PSMD1/GPN2/MYO1E/CD274/GSTO1/KLHL21/RHOBTB2/CD63/RALA/IGF2R/ATP6V1B2/MFSD2A/KYNU/CYP51A1/PAX8/PSMD7/KPNB1/PPIL1/…
GSE37605_TREG_VS_TCONV_NOD_FOXP3_FUSION_GFP_UP	GSE37605_TREG_VS_TCONV_NOD_FOXP3_FUSION_GFP_UP	GSE37605_TREG_VS_TCONV_NOD_FOXP3_FUSION_GFP_UP	131	0.357259	1.77566	5.81e-05	0.000844536	0.000589738	4510	tags=31%, list=14%, signal=27%	SLC25A25/HMGA1/ITGA5/ADM/EGR2/PHLDA1/AKAP12/NR4A3/SPRY2/UBE2R2/GSTO2/SERPINE1/FANK1/ATF3/DUSP6/SLC25A33/EDN1/OPN3/HBEGF/IL1A/PTGS2/CCRL2/GFAP/MT1A/CCL2/TGFB1I1/MFHAS1/TRIB1/UST/PEG10/FBXO9/TMED6/SGK1/RND3/SNORA74A/ADAMTS9/NAT8B/FLVCR2/GRM8/TET3
GSE26928_EFF_MEMORY_VS_CXCR5_POS_CD4_TCELL_DN	GSE26928_EFF_MEMORY_VS_CXCR5_POS_CD4_TCELL_DN	GSE26928_EFF_MEMORY_VS_CXCR5_POS_CD4_TCELL_DN	184	0.340187	1.77564	7.48e-05	0.000844536	0.000589738	8978	tags=47%, list=27%, signal=34%	LARGE1/MDS2/NFX1/TMEM17/FILIP1L/KLHL29/CR2/TOP1MT/FASTKD5/GEMIN4/ZNF558/LINC01181/RETREG1/C1orf54/LINC01252/PCSK5/SLC8B1/IGF1R/ACTN1/TENT5B/LDLRAP1/ZNF23/EBF2/NRIP1/CHI3L2/BCL2A1/CFAP54/DHX15/NIF3L1/TCEA3/HNRNPH1/SDCBP/ZNF83/FAM184A/CAND2/CERS6/SLC11A2/SHANK3/ARHGEF28/AFF4/GJB6/CLEC4A/SPART/ZSWIM6/KLHL3/XRCC4/GALNT12/SERINC5/PARS2/ABITRAM/KDF1/PPCS/ANKRD29/BEX1/TIMP2/KIF13A/WNT8A/RMND5B/EIF5A/GAL…
GSE21360_PRIMARY_VS_TERTIARY_MEMORY_CD8_TCELL_UP	GSE21360_PRIMARY_VS_TERTIARY_MEMORY_CD8_TCELL_UP	GSE21360_PRIMARY_VS_TERTIARY_MEMORY_CD8_TCELL_UP	200	0.336339	1.77309	8e-05	0.000844536	0.000589738	6850	tags=36%, list=21%, signal=29%	PHLDA1/TNFSF14/THBD/SERPINE1/SFXN3/CA2/HMOX1/EREG/SLC7A8/MAPK13/CHST15/URB2/SLC7A6/ABCC1/ZFAND5/MLXIP/HPCAL1/RGS12/SQSTM1/PLIN2/PLEC/CLPTM1/ARAP1/ACO2/EIF3B/NOTCH3/ARHGEF2/DNASE1L1/CD300C/RBM12/ODC1/ENG/DNMBP/AQP9/SLC6A6/PHC2/DTX2/ALDH3B1/TRAM1/SLC16A3/FCMR/ST3GAL6/MITF/ABR/MFSD5/DHPS/DGCR2/ACP2/FARSA/ADORA3/TWF2/FAM214B/KLHL21/LYL1/CD180/ARF1/SUPT4H1/XPOT/GNA12/LPL/NCOR2/NKRF/AFG3L2/DGKD/C1QBP/P…
GSE46606_UNSTIM_VS_CD40L_IL2_IL5_1DAY_STIMULATED_IRF4_KO_BCELL_UP	GSE46606_UNSTIM_VS_CD40L_IL2_IL5_1DAY_STIMULATED_IRF4_KO_BCELL_UP	GSE46606_UNSTIM_VS_CD40L_IL2_IL5_1DAY_STIMULATED_IRF4_KO_BCELL_UP	200	0.335857	1.77055	8e-05	0.000844536	0.000589738	5733	tags=34%, list=17%, signal=28%	RRP12/CBFA2T3/ENPP2/HOMER1/EGR2/CCDC86/DAGLA/KCNN4/JCAD/NCLN/SLC7A8/ITGAX/RABGGTA/TRIP6/SNAI3/ASPH/PDLIM4/IL1RN/CARD9/MEF2A/ATP1A1/VSIG10L/ST6GAL1/ATP13A1/ZNF330/CCL2/FKBP1A/FERMT3/NARS2/MFN2/TNFRSF12A/MRPS30/SLC17A9/SLC43A3/FNIP2/UBAP2L/G6PD/SPRED1/MANBAL/TTLL12/UTP4/MYOF/EPOP/SPG21/CCR1/EEF1AKMT1/NSFL1C/FLVCR2/FARSB/PAICS/UBA7/VWA8/HDHD5/IMP4/CD53/MDN1/S100A11/PTER/KLHL8/RILP/CRYBG3/IL1RAP/LPL/…
GSE33424_CD161_HIGH_VS_NEG_CD8_TCELL_UP	GSE33424_CD161_HIGH_VS_NEG_CD8_TCELL_UP	GSE33424_CD161_HIGH_VS_NEG_CD8_TCELL_UP	197	0.335436	1.76521	7.94e-05	0.000844536	0.000589738	7309	tags=38%, list=22%, signal=30%	CXCR5/CD19/FCRLA/AKAP12/BCL6/FCER2/POU2AF1/CORO2B/IGLC7/HLA-DOB/RALGPS2/PLCG2/BLK/ATF1/CA2/SPIB/TCF4/PCSK5/C1orf43/PKIG/FICD/MS4A1/INPPL1/CD83/CD79B/BCL2A1/QRSL1/VAMP4/ALCAM/PPP1R15B/SYPL1/EIF4G2/ZNF385A/DNAJB9/MBD4/SNX9/SLC44A1/ZC3H12C/DNAJA2/MTPN/COLGALT1/NCF2/SH2B3/AKAP8/MGAT1/GSTM3/RHOQ/MYO1E/PLEKHB2/EVI5/EEA1/PISD/SELL/LYL1/CYRIB/CD40/MEF2C/STT3B/GNA13/LYN/NAPSA/GNG10/SYK/HSPA4/LPGAT1/RAB14/…
GSE21670_STAT3_KO_VS_WT_CD4_TCELL_TGFB_IL6_TREATED_DN	GSE21670_STAT3_KO_VS_WT_CD4_TCELL_TGFB_IL6_TREATED_DN	GSE21670_STAT3_KO_VS_WT_CD4_TCELL_TGFB_IL6_TREATED_DN	199	0.335	1.76469	7.98e-05	0.000844536	0.000589738	8830	tags=45%, list=26%, signal=33%	AQP3/MDS2/ITGA5/YPEL4/RGCC/CD27/RCBTB2/CA2/ZFYVE16/AVPI1/ACTN1/TTYH2/GCNT4/RTN1/SIRPG/GCLC/DSC1/DHRS9/RHBDD2/MRAS/CAMSAP2/ADAM28/GABBR1/TMEM63A/GPAT3/VSIR/ARHGAP21/ANXA11/NAB2/CCDC88A/SDCBP/CLEC4D/TMBIM1/ADAMDEC1/MADD/LYZ/SLC37A2/SLC44A1/SLAMF7/MYADM/CREG1/CD52/IQSEC1/MITF/ZMIZ1/CPED1/CLEC4E/KLHL3/SORBS3/ITGB2/PTPRJ/CLEC6A/ESYT1/XCR1/FGL2/CD180/LRRK2/CD9/TPP1/TIMP2/NCEH1/ACP5/ME1/TGFBI/LFNG/NFE2L…
GSE6269_HEALTHY_VS_STAPH_PNEUMO_INF_PBMC_DN	GSE6269_HEALTHY_VS_STAPH_PNEUMO_INF_PBMC_DN	GSE6269_HEALTHY_VS_STAPH_PNEUMO_INF_PBMC_DN	166	0.342511	1.76237	6.85e-05	0.000844536	0.000589738	8044	tags=46%, list=24%, signal=35%	ADM/BCL6/PRTN3/ELANE/CEACAM6/IMPA2/QPCT/ABCC6/COL9A3/IL1RN/FCN1/PGD/RAB1A/TRIO/PLEC/CYP1B1/BPI/MPO/CDA/TRIM25/SLC16A1/SORT1/PLIN3/SDCBP/CYBB/DEFA4/GPX3/MYL9/VAMP3/GNAQ/SPI1/TOM1/MAP1A/VCAN/LGALS3/GSN/SLC25A37/ZMIZ1/FLVCR2/CXCL8/FUT4/ALDOA/APLP2/CHSY1/MICAL2/CD63/HTR3A/CYP51A1/TPP1/CD33/PLAUR/CPD/TIMP2/FOS/PLEK/EIF5A/STX12/LAPTM4A/ADIPOR1/CTBS/CLEC5A/GRB2/IFNGR2/ADAM9/MCFD2/FADS1/SIRPAP1/ZYX/CHMP3…
GSE5589_WT_VS_IL6_KO_LPS_AND_IL10_STIM_MACROPHAGE_45MIN_DN	GSE5589_WT_VS_IL6_KO_LPS_AND_IL10_STIM_MACROPHAGE_45MIN_DN	GSE5589_WT_VS_IL6_KO_LPS_AND_IL10_STIM_MACROPHAGE_45MIN_DN	198	0.334192	1.76017	7.95e-05	0.000844536	0.000589738	7799	tags=41%, list=23%, signal=32%	SLC25A25/HMGA1/ZCCHC2/MYRF/ANKRD55/ZPR1/BCL6/CLCF1/ASAP2/ANXA1/XDH/HMG20B/ATF1/DPEP3/ZBTB21/SLC12A5/LZTS2/FEM1C/ZNF697/UTP18/FEM1B/ARHGAP5/VAMP4/PTPRS/PIP5K1C/SLC41A2/ESAM/TSPAN17/RNMT/CCDC88A/ABCF2/TFRC/ATP11C/MINK1/LETM1/MATK/PAFAH1B2/ECPAS/CLIC4/ATP6V1H/CDV3/BAMBI/TMEM158/COLGALT1/ARHGAP10/C8orf37/LARP4B/PPARG/PDE4DIP/PDIA4/CSRNP2/PGRMC1/CAVIN1/PITX1/MET/PTGES2/TMEM230/RASAL1/CLCN5/SLC4A11/LMB…
GSE24102_GRANULOCYSTIC_MDSC_VS_NEUTROPHIL_DN	GSE24102_GRANULOCYSTIC_MDSC_VS_NEUTROPHIL_DN	GSE24102_GRANULOCYSTIC_MDSC_VS_NEUTROPHIL_DN	198	0.333564	1.75686	7.95e-05	0.000844536	0.000589738	8251	tags=41%, list=25%, signal=31%	RBM19/CHSY3/PLEKHO1/DDX21/TRMT61A/TIMP1/MYCL/MIR22HG/RHOC/DNAJA3/TMCC3/EIF4G1/WDR74/SRXN1/SLC7A8/CHCHD4/EIF1AX/ST13/IL1A/ADO/NOLC1/STX4/RRP9/MFHAS1/SLC39A1/NAB2/FASTKD2/UTP6/TRIM13/MRPS18B/DTX2/TTLL12/MYOF/WDR43/TMEM169/NFKBIE/SNX8/FAM86B2/BAG3/ENO4/MYO1E/MET/ADGRE1/MICU3/CD160/ATP2A2/DPP6/SLC15A3/FYTTD1/BCL2L2/NOP9/PTGES3/TNIP1/TMED9/SLC25A13/RRS1/PYCR3/FGFR1/YBX3/TXNL1/CAPN2/BIK/TFEC/RPP14/DNAJ…
GSE21670_UNTREATED_VS_IL6_TREATED_STAT3_KO_CD4_TCELL_DN	GSE21670_UNTREATED_VS_IL6_TREATED_STAT3_KO_CD4_TCELL_DN	GSE21670_UNTREATED_VS_IL6_TREATED_STAT3_KO_CD4_TCELL_DN	194	0.334031	1.75644	7.8e-05	0.000844536	0.000589738	6302	tags=38%, list=19%, signal=31%	RRP12/IL1B/DDX21/TAF4B/BCL6/CMTM8/EIF4G1/TRMT1/CXCL5/WDR74/MRTO4/PNO1/TSEN2/PPRC1/SLC7A1/URB2/TFB2M/UTP20/F2RL1/ADD2/PUS7/TRAP1/GPATCH4/NOLC1/SFXN4/NOC3L/NAA25/NOL6/POLR3D/EIF3B/PAK1IP1/TSPAN17/CCT2/RPF2/FAM184A/SEH1L/CLUAP1/UTP4/POLR1C/WDR43/TSPAN3/DHPS/MAT2A/MRPS25/LARS1/IPO5/DCTD/RAPGEF6/NAA15/FARSB/PAICS/BYSL/MDN1/MET/POLR1A/SCFD2/WDR12/NOP14/C12orf66/HNRNPAB/NDST2/DYRK2/EPHB4/EXOSC5/NOL10/SU…
GSE29618_BCELL_VS_MDC_DAY7_FLU_VACCINE_DN	GSE29618_BCELL_VS_MDC_DAY7_FLU_VACCINE_DN	GSE29618_BCELL_VS_MDC_DAY7_FLU_VACCINE_DN	200	0.33296	1.75528	8e-05	0.000844536	0.000589738	6584	tags=40%, list=20%, signal=32%	RGCC/TOB1/TIMP1/MYCL/NDRG1/RHOC/ANXA1/CD1B/ATF3/C1orf54/IMPA2/ITGAX/ACTN1/CREB5/PTPRE/RTN1/IL1RN/LST1/TMEM43/DOCK5/LGALS2/IL1R2/FKBP1A/LIMS1/IL6R/SORT1/KLF10/OGFRL1/ATP6AP1/CD1D/PEA15/RCOR1/GABARAP/INSR/PTTG1IP/VIM/GNAQ/RTN4/CREG1/LMO2/DPYSL2/CSF1R/CLEC4A/ST3GAL6/SIRPA/PKM/RAB7A/TYROBP/SH2B3/EIF4A1/GSN/RUFY3/ACTB/ALDOA/VCL/CD1C/CPQ/PLCB2/CD1E/CSGALNACT2/LMNA/CD63/FLT3/NACC2/SLC30A1/FBP1/CD33/RNF1…
GSE32986_CURDLAN_LOWDOSE_VS_GMCSF_AND_CURDLAN_LOWDOSE_STIM_DC_DN	GSE32986_CURDLAN_LOWDOSE_VS_GMCSF_AND_CURDLAN_LOWDOSE_STIM_DC_DN	GSE32986_CURDLAN_LOWDOSE_VS_GMCSF_AND_CURDLAN_LOWDOSE_STIM_DC_DN	194	0.333243	1.7523	7.8e-05	0.000844536	0.000589738	5474	tags=34%, list=16%, signal=29%	NFX1/RGCC/PHLDA1/RAI14/IL1B/SPHK1/UTP15/UFM1/RRN3/DUSP7/CA2/KLF9/KCNN4/IFRD2/DUSP6/MAP2K3/CHML/SLC7A1/SLC7A6/ABCC1/ASAP1/GSPT1/RRP9/DHX37/PUS1/DYNC1LI1/LSS/BMS1/KLF7/NSUN2/RABEP1/AMPD2/NOP16/RARA/EIF3B/HSPA9/EIF6/EML4/DIMT1/RBM12/ODC1/SEH1L/EMP1/CDV3/WDR43/ACACA/ETF1/PAK2/EIF5/HSPA8/NAA15/REL/CHST7/TOMM40/MAPK1IP1L/PDIA4/NOL8/MON1B/CDH1/ATP2A2/PDLIM7/SRFBP1/CLCN6/MFSD2A/QTRT2/MTAP
GSE3982_MAST_CELL_VS_NKCELL_UP	GSE3982_MAST_CELL_VS_NKCELL_UP	GSE3982_MAST_CELL_VS_NKCELL_UP	196	0.332271	1.74849	7.89e-05	0.000844536	0.000589738	9702	tags=47%, list=29%, signal=34%	ARAP3/ENPP2/RAI14/FAT1/AKAP12/LRRC8B/TBC1D4/TWNK/NRP1/ACVR1/TIGD6/TSC22D1/SLC7A1/RTN2/UTP20/ALAS1/ADO/ZNF804A/DNAJC12/SORBS1/CAMSAP2/ITPRID2/ADAMDEC1/CERS6/COA7/TAOK3/MRPS10/CLIC4/GNAQ/RPF1/PPP2CA/MITF/SETMAR/AMPD3/CCT5/FRY/PAICS/PSMD1/N6AMT1/ELOC/LMNA/EVI5/NDST2/LRP12/LYL1/M6PR/RAB20/TALDO1/FER/STXBP1/TAX1BP1/LAMP1/IPO7/C1QBP/RTN3/BCAT1/TNPO3/PSMA3/CLTC/HSPA4/KLHL9/PSMD12/SOX4/ADAM9/MCFD2/IDH1/Z…
GSE3982_MAC_VS_TH2_UP	GSE3982_MAC_VS_TH2_UP	GSE3982_MAC_VS_TH2_UP	194	0.331	1.74051	7.8e-05	0.000844536	0.000589738	7347	tags=39%, list=22%, signal=31%	CDKN1A/EGR2/SCG5/CLCN7/CLN8/SPRY2/CHRM5/USP12/TSC1/VPS37C/CSPG4/SPAG9/LILRA2/FBXO38/FCN1/CCRL2/HK2/STARD8/MID2/TRIO/PROC/ANGEL1/ZCCHC14/UBQLN2/DOCK3/PRKAG2/NRBF2/DNAJB9/ENG/TRAF3IP2/NRIP3/PSEN1/PIK3CB/SLC11A2/LAMTOR3/ACO1/SLC11A1/INHBA/FHIT/CCL22/RASAL2/ANPEP/UBTD1/GTF2IRD1/PPP2CB/ACP2/VCL/KDM7A/PLXNA1/RHOBTB2/GCNT2/LIN7C/MX2/PAPSS1/ARHGAP22/ABCC3/VAV3/MOSPD1/TNPO1/FZD5/CD84/BCL11A/RENBP/LAPTM4A/…
GSE11961_GERMINAL_CENTER_BCELL_DAY7_VS_GERMINAL_CENTER_BCELL_DAY40_DN	GSE11961_GERMINAL_CENTER_BCELL_DAY7_VS_GERMINAL_CENTER_BCELL_DAY40_DN	GSE11961_GERMINAL_CENTER_BCELL_DAY7_VS_GERMINAL_CENTER_BCELL_DAY40_DN	193	0.331036	1.73871	7.8e-05	0.000844536	0.000589738	5243	tags=27%, list=16%, signal=23%	RBM19/AFF3/ADM/SLC66A1/ADAMTS6/ANKRD55/TMEM17/BCL6/NUAK2/KRBA1/C17orf97/MYO1C/MLH3/CAMKK1/FAM160A1/PLD4/ACTN1/TTC23/CRYZ/EARS2/GNAT2/KHNYN/IMMP2L/GPATCH4/PFN2/DMAC2/IPO4/LTO1/C1QTNF9/IGLON5/OVGP1/MRPS18B/ZNF318/CCT6B/INSR/PGAM5/TAOK3/SLC37A2/TMED6/CHD9/SLC29A3/ANKRD46/WDFY4/CC2D2B/SNX8/ATP6V0B/UBA7/TRPM5/POLR1A/PTPRJ/EVI5/CMTM6/CLCN6
GSE28726_NAIVE_CD4_TCELL_VS_NAIVE_NKTCELL_UP	GSE28726_NAIVE_CD4_TCELL_VS_NAIVE_NKTCELL_UP	GSE28726_NAIVE_CD4_TCELL_VS_NAIVE_NKTCELL_UP	199	0.329593	1.73621	7.98e-05	0.000844536	0.000589738	7354	tags=40%, list=22%, signal=32%	INPP5F/HOMER1/PER2/EGR2/ZPR1/PWP2/POU2AF1/NSMAF/AHCYL1/FSCN1/LAMA3/SFXN3/CA2/ATF3/ZFYVE16/MAP2K3/PNO1/SPAG9/ACSL3/EVI2B/URB2/NDEL1/AMD1/RANBP2/CD200/UTP18/NOLC1/EIF4E/BCL2A1/TOR1B/ADAM17/VASP/GLS/RARA/EIF4G2/EMG1/PEA15/EMP1/MATK/GNAI1/CEP170/VIM/SERPINB2/CYCS/WDR43/PPP2CA/CCT6A/PGAM1/PAICS/CALU/RHEB/MAP3K11/S100A11/SYNCRIP/C6orf120/TMEM251/HNRNPAB/CD9/PSMD7/IL1RAP/WDR1/EIF2S1/TMED9/IPO7/EGR3/NUBP…
GSE3982_BCELL_VS_NKCELL_UP	GSE3982_BCELL_VS_NKCELL_UP	GSE3982_BCELL_VS_NKCELL_UP	195	0.329858	1.73545	7.84e-05	0.000844536	0.000589738	7644	tags=39%, list=23%, signal=31%	TCL1A/AQP3/FCRL2/RUBCNL/B9D2/CRYM/CD19/SAV1/BCL6/CNTNAP2/FCER2/IGHA1/HLA-DOB/HDAC9/ABCB9/PNOC/PIP5K1B/CLDN7/EHD3/TSEN2/PKIG/COL9A3/JADE3/OPN3/ATP6V1G1/HK2/ADO/BANK1/CD200/NT5E/IRGQ/PUS1/TRIM25/UBE2J1/CCT2/DNAJC3/HMBS/CLIC4/PABPC4/TSPAN3/DSE/AMPD3/HEMK1/RASGRP3/ENPP3/TTC9/GLDC/MIEF1/N6AMT1/GTF2A1/LYL1/TRAF3/FA2H/GNA12/APTX/PRODH/C3orf52/RAD23B/TBC1D22A/H2BC12/NDUFAF1/BAIAP3/WDR77/PPM1E/GTF2F2/BIK/…
GSE36826_WT_VS_IL1R_KO_SKIN_DN	GSE36826_WT_VS_IL1R_KO_SKIN_DN	GSE36826_WT_VS_IL1R_KO_SKIN_DN	196	0.329659	1.73474	7.89e-05	0.000844536	0.000589738	5551	tags=33%, list=17%, signal=27%	CDKN1A/AKR1C2/DDX21/OLR1/MSC/MYCL/STK38L/SLC7A11/TCIRG1/POTEKP/LAMP3/KCNN4/DUSP6/DNAJB5/DPH2/QPCT/SLC16A6/IGF2BP2/FLNA/ABCE1/CDK14/KHNYN/GCLC/LST1/BACH1/TMEM43/VCP/MTF1/ALCAM/EIF4G2/GDI1/EIF6/BCCIP/AQP9/PITPNA/EMP1/VIM/CST6/PTBP1/PNP/STARD5/HNRNPM/PSMA1/ANPEP/VCAN/DSE/CD101/SLC25A37/FRY/SH3BGRL3/REL/PTPN6/ACTB/S100A6/CD53/CSNK2A1/PACSIN2/IGSF3/PDLIM7/SGCB/EBLN2/NAMPT/C5AR1/ACVR2A
GSE5589_UNSTIM_VS_180MIN_LPS_AND_IL10_STIM_MACROPHAGE_UP	GSE5589_UNSTIM_VS_180MIN_LPS_AND_IL10_STIM_MACROPHAGE_UP	GSE5589_UNSTIM_VS_180MIN_LPS_AND_IL10_STIM_MACROPHAGE_UP	197	0.329575	1.73437	7.94e-05	0.000844536	0.000589738	7932	tags=44%, list=24%, signal=33%	TCF7L2/ZPR1/DNAJA3/MOB3B/MAN2C1/HMG20B/TCIRG1/WDR74/DAGLA/SEMA4B/UBXN6/SPAG9/MGAT4B/ELMO2/CLDN12/C3orf33/IARS1/BCL2A1/CAMSAP2/MMP19/ARHGAP5/PTPRS/ALDH1B1/UGDH/NUS1/RPF2/KLF10/CD300C/LIMK1/RBM47/SDC1/AKR1B1/ATP6V1H/SEPTIN10/RAB11FIP2/CD44/XPR1/AK8/NFE2L1/PIK3CA/ADCK1/KMT5B/LARP4B/BAIAP2/NAA35/CTNND1/MAPK1IP1L/MIEF1/ABHD13/LMNA/EEA1/ESYT1/CRYBG3/SLC15A3/FYTTD1/MTAP/PDXDC1/OSTM1/PTGES2/CBR1/TMEM230/…
GSE46242_CTRL_VS_EGR2_DELETED_TH1_CD4_TCELL_UP	GSE46242_CTRL_VS_EGR2_DELETED_TH1_CD4_TCELL_UP	GSE46242_CTRL_VS_EGR2_DELETED_TH1_CD4_TCELL_UP	195	0.328371	1.72763	7.84e-05	0.000844536	0.000589738	6173	tags=36%, list=18%, signal=29%	CPA5/CDKN1A/IGFBP6/ABCB4/TGIF2/NAGPA/GGA1/GATD3A/FSCN1/SLC7A11/CD1B/RNF41/TACSTD2/LOXHD1/BTLA/PLD4/ILRUN/ITGAX/CHCHD4/RAP1GAP/ADGRB1/ADAMTS8/S100A5/TLR6/KIF17/TNFAIP8L1/GPAT3/PIP4P1/TENT4B/TREML2/LTO1/PIP5K1C/SOGA1/GDI1/PXDC1/VDAC2/ARHGEF2/ABCF2/PEA15/NRIP3/STARD7/MATK/TEX28/ABHD2/MYADM/RANBP10/ZBTB43/NARS1/MAP1A/GUCA1A/UBTD1/TP73-AS1/RASGRP3/TNF/TBC1D1/FAM20A/NKIRAS2/PDLIM7/RCN3/ZNF562/FA2H/MEGF…
GSE36888_UNTREATED_VS_IL2_TREATED_TCELL_6H_DN	GSE36888_UNTREATED_VS_IL2_TREATED_TCELL_6H_DN	GSE36888_UNTREATED_VS_IL2_TREATED_TCELL_6H_DN	194	0.327414	1.72165	7.8e-05	0.000844536	0.000589738	7619	tags=38%, list=23%, signal=29%	TKFC/POP4/CD1B/HMG20B/C15orf61/AVPI1/CHML/CHCHD4/TSSK4/ATP6V1G1/GCLC/UTP18/CNBP/WFDC21P/OTUD4/CAMK1/SLC16A1/PACRGL/GTF3C2/THEM5/PPARGC1B/VSIG4/MCRIP2/MYOF/DDX28/NARS1/CANX/LRRK1/LIG3/CLEC12B/FUCA2/ADCK1/CCT5/SEC63/ZNF664/NOL8/CD1E/NETO2/MYO1E/CRLS1/ENC1/GRSF1/ELP1/SCO1/LARP4/A2M/TREML1/RIOK2/COMMD10/GFM1/ENTR1/ACVR2A/FABP5/EPS8/FASTKD1/PIGW/SP2-AS1/COG2/SLC25A13/COX18/NDC1/PNPO/TFAM/CD84/SETD7/E2…
GSE3039_CD4_TCELL_VS_B2_BCELL_DN	GSE3039_CD4_TCELL_VS_B2_BCELL_DN	GSE3039_CD4_TCELL_VS_B2_BCELL_DN	198	0.326433	1.7193	7.95e-05	0.000844536	0.000589738	6610	tags=37%, list=20%, signal=30%	AKR1E2/PWP2/MYCL/NR4A3/RRN3/TXNRD1/KCNN4/TSR1/MRTO4/SCIN/COL23A1/SNAI3/IGF2BP2/OPN3/HBEGF/NECTIN2/GORASP1/DAG1/AKAP1/MFHAS1/RDH13/EIF3B/NAB2/JAM2/FNIP2/MTX1/TMBIM1/TRIM13/ODC1/APEX1/ZNF318/METTL1/KCTD5/SLC19A1/SPRED1/SERPINB2/MRTFB/DHX33/LPP/SLC52A3/SNX3/ANPEP/LGALS3/PLEKHM2/POLR3H/C7orf50/MTG1/IFT43/ACP2/SIGMAR1/ALDOA/RHOQ/CD53/MYO1E/CD274/PLXNA1/TULP4/CDH1/A2M/HNRNPAB/LRP12/CCL7/EPS8/PLAUR/SHTN…
GSE29618_MONOCYTE_VS_MDC_DAY7_FLU_VACCINE_UP	GSE29618_MONOCYTE_VS_MDC_DAY7_FLU_VACCINE_UP	GSE29618_MONOCYTE_VS_MDC_DAY7_FLU_VACCINE_UP	199	0.326148	1.71806	7.98e-05	0.000844536	0.000589738	9773	tags=52%, list=29%, signal=37%	ARAP3/TCF7L2/MSRB1/DUSP6/HMOX1/QPCT/CHST15/HLA-B/FCN1/GLRX/PGD/SQSTM1/ZNF185/PLIN2/TKT/CYP1B1/ITGAM/CDA/KLF7/MBD2/SYPL1/PYGL/SDCBP/TMBIM1/LILRB2/SERINC1/KIAA0513/CYBB/VAMP3/SLC11A1/CREG1/CD44/TOM1/NCF2/BEST1/VCAN/LGALS3/MID1IP1/FRY/IRAK3/CXCL8/FUT4/EVI2A/APLP2/ENC1/NCF1C/ADGRE1/CD63/IGF2R/ATP6V1B2/BTG2/MTARC1/LHFPL2/RHOA/NAMPT/C5AR1/TMEM127/LAMP1/PDXK/HAL/CTSL/RTN3/CLEC7A/TNFRSF1B/SMPDL3A/RBMS1/L…
GSE1925_CTRL_VS_24H_IFNG_STIM_MACROPHAGE_DN	GSE1925_CTRL_VS_24H_IFNG_STIM_MACROPHAGE_DN	GSE1925_CTRL_VS_24H_IFNG_STIM_MACROPHAGE_DN	189	0.327543	1.71583	7.66e-05	0.000844536	0.000589738	4666	tags=30%, list=14%, signal=26%	RBM19/ARAP3/LTBP2/SYNC/C1QTNF4/SLC39A13/CFAP58/TNFSF14/KANK1/PTGDS/RHOC/EFR3B/COL13A1/KCNN4/MRPL50/CLDN7/DNAJB5/GSG1/S1PR2/ABCE1/NIBAN2/IL1RN/INPPL1/KIRREL3/ATP6V1G1/PUS7/C5orf64/RIOX2/STX4/C10orf71/DYNC1LI1/RASA3/SLC39A12/MAP7/LINC01128/KIF1B/ZBTB7B/CCT2/VDAC2/EBNA1BP2/ENG/PLOD3/CLUAP1/CYBB/GTPBP3/NAV1/PCARE/SCAMP3/SLC16A3/ZNF281/AKIRIN1/SH2B3/BAG3/GNPNAT1/PAICS/RPL7L1/OCLN
GSE21670_STAT3_KO_VS_WT_CD4_TCELL_IL6_TREATED_UP	GSE21670_STAT3_KO_VS_WT_CD4_TCELL_IL6_TREATED_UP	GSE21670_STAT3_KO_VS_WT_CD4_TCELL_IL6_TREATED_UP	191	0.326802	1.7144	7.73e-05	0.000844536	0.000589738	6325	tags=34%, list=19%, signal=28%	SYNC/RFLNB/RGCC/REEP1/NAGPA/OLR1/MSRB1/XDH/BMX/LMAN1L/CCDC63/FLNA/MSANTD2/ALAS1/NECAP1/GLRX/DMKN/TMEM38B/TRIM17/SNED1/GALNS/RASA3/ANKRD28/SLC36A4/UGDH/DNAJC3/CSDE1/ZHX1/PLOD3/MGAM/GALK2/G6PD/SLAIN2/TMEM26/RND3/RNF4/GOSR1/SGMS2/PPFIBP1/CLEC4A/SOWAHC/PAPSS2/IRAK3/CSF2/PDE4DIP/EHD4/ADGRE1/ATP11A/TAF13/PTER/ESYT1/CYRIB/ARF1/DAB2/LPL/RNF130/TXNDC5/SDF4/RNF13/LAMP1/TMX3/KIF13A/OR52N4/RTN3/CLEC7A
GSE22886_TH1_VS_TH2_48H_ACT_UP	GSE22886_TH1_VS_TH2_48H_ACT_UP	GSE22886_TH1_VS_TH2_48H_ACT_UP	177	0.329825	1.71207	7.26e-05	0.000844536	0.000589738	4200	tags=28%, list=13%, signal=25%	LTBP2/DEPP1/DECR2/TBXA2R/SMYD5/POU2AF1/RASL10A/DHX34/TTLL4/PLCG2/PAX5/PEG3/KCNN4/CLDN7/GNG7/AOC1/DNAJB5/EREG/LILRA2/CDR2L/RTN1/RAP1GAP/FADS3/PNLIPRP1/ZNF205/OLFML2A/CD83/CDK20/MRAS/SORBS1/CDC42EP1/TNFRSF12A/ERCC1/EDA2R/CTNND2/ZNF408/PLXNB2/ANKRD28/MTX1/VARS1/COLEC12/EMP1/COX10/TAPT1/SLC11A1/SGK1/CDC42BPB/LAMB3/LGALS3/PROX1
KAECH_DAY8_EFF_VS_DAY15_EFF_CD8_TCELL_DN	KAECH_DAY8_EFF_VS_DAY15_EFF_CD8_TCELL_DN	KAECH_DAY8_EFF_VS_DAY15_EFF_CD8_TCELL_DN	197	0.32466	1.7085	7.94e-05	0.000844536	0.000589738	5528	tags=30%, list=17%, signal=25%	CXCR5/IGHG1/CYP2J2/RFLNB/E2F5/IL1B/FCRLA/SCG5/IGKC/BCL6/FCER2/POU2AF1/IGLC7/HLA-DOB/RALGPS2/BLK/POU6F1/WDR74/TCF4/DUSP6/PCSK5/TSC22D1/IGF1R/TCF7/NECAP1/NSG2/FEM1B/ADGRD1/IPO4/MROH1/DVL1/GPR3/PTPRS/PLXNB2/IL6R/XPC/OVGP1/AQP9/TFCP2/SLC11A2/SLPI/CREG1/CXXC5/CCR1/PTK6/NIT2/MAT2A/SVIL/SH2B3/ZNF398/IL7R/CHI3L1/LAPTM5/HHEX/PISD/SELL/NR1D2/BCL2L2/AARD
GSE11864_CSF1_IFNG_VS_CSF1_PAM3CYS_IN_MAC_DN	GSE11864_CSF1_IFNG_VS_CSF1_PAM3CYS_IN_MAC_DN	GSE11864_CSF1_IFNG_VS_CSF1_PAM3CYS_IN_MAC_DN	188	0.325754	1.70485	0.000152579	0.00145188	0.00101384	7787	tags=44%, list=23%, signal=34%	DDX31/CASP5/RAI14/DTX1/CRADD/MAP4K4/RETREG1/TXNRD1/IFRD2/PNO1/TSC22D1/SPAG9/RPGR/GRHL1/EPPK1/ACSL5/KHNYN/CD83/PTGS2/ZNF701/FPGS/ABL2/SRC/CHMP7/CHI3L2/UBQLN4/IARS1/ADGRA2/CD109/FTH1P5/RABGEF1/IPO4/ATP13A3/URB1/PAK1IP1/PXDC1/ITPRIP/TFRC/TRIM13/ARL8B/SNAI1/SLC6A6/DTX2/AIFM2/DNAAF5/CXorf58/TOM1/CCT6A/SOWAHC/LAMB3/AMPD3/SNORA74A/HCG4/ASPHD1/ACTB/TTC7B/TBC1D30/DNER/CMTM6/BTG2/IL1RAP/CD40/LYN/SLC3A2/FAM…
GSE360_L_DONOVANI_VS_M_TUBERCULOSIS_MAC_UP	GSE360_L_DONOVANI_VS_M_TUBERCULOSIS_MAC_UP	GSE360_L_DONOVANI_VS_M_TUBERCULOSIS_MAC_UP	194	0.323813	1.70272	7.8e-05	0.000844536	0.000589738	5947	tags=36%, list=18%, signal=29%	JUP/TNFSF14/NR4A3/SLC6A8/ATP1B2/TSC22D2/TXNRD1/USP12/LAMP3/GPC3/HMOX1/CHERP/MAPKAPK5/ITGAX/CHST15/URB2/IL1RN/ADO/FGR/NPC1/CCL2/TRIB1/HYOU1/TBL2/CCR7/ALDH1B1/PAN2/CRABP2/TFRC/MRC1/SLC6A6/CDV3/COL19A1/GRIK2/LMTK2/TIAM1/TRAM1/MAK16/CCL22/FUT6/ABR/DHX38/SVIL/OSBPL8/CBX7/PDIA4/ITGB1BP1/SORBS3/RHEB/HSPA5/S100A11/KLHL21/NDST1/C6orf120/MUC2/SERINC5/TPD52L2/TUBB7P/DAB2/RPN1/PPP2R5A/GDI2/CUL2/LPL/TAX1BP1/L…
GSE20152_HTNFA_OVERXPRESS_ANKLE_VS_CTRL_SPHK1_KO_ANKLE_UP	GSE20152_HTNFA_OVERXPRESS_ANKLE_VS_CTRL_SPHK1_KO_ANKLE_UP	GSE20152_HTNFA_OVERXPRESS_ANKLE_VS_CTRL_SPHK1_KO_ANKLE_UP	185	0.32565	1.70165	7.52e-05	0.000844536	0.000589738	4599	tags=28%, list=14%, signal=24%	HMGA1/KCTD15/PLA2G4C/MICALL2/ACTN2/PLPPR2/TNFSF14/MSC/POU2AF1/SLC12A3/SLC25A32/UFM1/TTC4/MYBPC3/GPRC5A/TSC22D2/KCNN4/MAP2K3/PPP1R11/XIAP/RUSC2/RTN1/PXN/PICK1/RGS20/AMD1/TOPORS/KDM5C/RGS12/SNED1/MTF1/SLIT3/GLS/PVR/TVP23B/FASTKD2/CRABP2/ACVR1B/SNAI1/NRIP3/CDV3/PPFIBP1/CSF1R/SVEP1/FCGR2C/AKAP8/GFPT1/TGFB1/DAPP1/PPARG/S100A6/CSF2
GSE24142_EARLY_THYMIC_PROGENITOR_VS_DN2_THYMOCYTE_FETAL_UP	GSE24142_EARLY_THYMIC_PROGENITOR_VS_DN2_THYMOCYTE_FETAL_UP	GSE24142_EARLY_THYMIC_PROGENITOR_VS_DN2_THYMOCYTE_FETAL_UP	198	0.323002	1.70123	7.95e-05	0.000844536	0.000589738	5673	tags=34%, list=17%, signal=29%	GEM/RFLNB/PER2/ABCB4/RAI14/TGIF2/TNFSF14/NDN/PRTN3/FCRL1/CA2/TSC22D1/CCR9/GCSAM/MPL/PPP1R2P1/IGF2BP2/NIBAN2/GCLC/PTPN12/CCND1/ST6GAL1/SULF2/MPO/TOR1B/NRROS/TMEM63A/TSPAN33/TGM2/SH3BP2/PLXNB2/PYGL/ESAM/OGFRL1/ADAMDEC1/AQP9/SNX9/PTTG1IP/VIM/B3GNT5/ST3GAL2/MYADM/LMO2/CD44/CD34/C11orf54/LRRK1/CSF1R/MITF/SIRPA/ZNF202/GSTM3/ARHGAP12/VCL/CLEC4E/CPQ/HSPA5/FAM102A/GCNT2/ITGB2/FLT3/DOCK7/RAMP2/FGL2/NR1D2/C…
GSE21546_ELK1_KO_VS_SAP1A_KO_AND_ELK1_KO_ANTI_CD3_STIM_DP_THYMOCYTES_DN	GSE21546_ELK1_KO_VS_SAP1A_KO_AND_ELK1_KO_ANTI_CD3_STIM_DP_THYMOCYTES_DN	GSE21546_ELK1_KO_VS_SAP1A_KO_AND_ELK1_KO_ANTI_CD3_STIM_DP_THYMOCYTES_DN	193	0.323754	1.70046	7.8e-05	0.000844536	0.000589738	5873	tags=33%, list=18%, signal=27%	INPP5F/CRHR2/GEM/FIBCD1/BABAM2/BCL6/LRATD1/SPRY2/JARID2/UTP25/CHKA/KCNT1/ACSM1/ITIH3/ZNF703/DUSP6/SERPINB12/MAPKAPK5/ILRUN/STIP1/QPCT/CREB5/YTHDF1/TFB2M/OPN3/INPPL1/LZTS2/ABL2/SQSTM1/IZUMO1/OSGIN1/TAGLN2/MFHAS1/KCMF1/CBS/ARHGAP21/SH3BP2/SELENON/TAF1A/RBM12/ARL8B/MANBAL/PTBP1/CDV3/CCDC71L/ZNF469/SARAF/BAG3/KIAA0232/RUFY3/HSPA8/TBC1D1/PLCB2/BEND3/GRSF1/KRT72/DHX16/SLC30A1/DYRK2/B3GNT3/CORO1C/USPL1/…
GSE19888_ADENOSINE_A3R_INH_PRETREAT_AND_ACT_BY_A3R_VS_A3R_INH_AND_TCELL_MEMBRANES_ACT_MAST_CELL_UP	GSE19888_ADENOSINE_A3R_INH_PRETREAT_AND_ACT_BY_A3R_VS_A3R_INH_AND_TCELL_MEMBRANES_ACT_MAST_CELL_UP	GSE19888_ADENOSINE_A3R_INH_PRETREAT_AND_ACT_BY_A3R_VS_A3R_INH_AND_TCELL_MEMBRANES_ACT_MAST_CELL_UP	192	0.323824	1.69958	7.78e-05	0.000844536	0.000589738	7026	tags=35%, list=21%, signal=28%	ADM/YPEL4/HOMER1/RGCC/TCF7L2/BCL6/SNX16/NR4A3/ZFYVE16/ZBTB18/UBXN6/OTUD1/ASAP1/BACH1/TMEM43/NRIP1/SQSTM1/ZNF354A/FTH1P5/ARAP1/DDX5/SLC26A11/OGFRL1/FTH1/MGAM/SERINC1/LYZ/WASL/RAB11FIP2/CD44/CANX/NCF2/PIK3CA/KPNA1/ZSWIM6/KMT5B/PNPLA8/CBX7/PI4K2A/NAA50/CXCL8/APLP2/KDM7A/DIP2B/IL7R/RNF19A/TULP4/RALA/PSMA3-AS1/ZNF565/KYNU/DAB2/NAMPT/PLAUR/NORAD/PICALM/MARF1/RB1CC1/MAP3K2/ERBIN/RNPC3/APC/SIRT1/SIPA1L3/…
GSE3337_CTRL_VS_4H_IFNG_IN_CD8POS_DC_UP	GSE3337_CTRL_VS_4H_IFNG_IN_CD8POS_DC_UP	GSE3337_CTRL_VS_4H_IFNG_IN_CD8POS_DC_UP	192	0.323759	1.69923	7.78e-05	0.000844536	0.000589738	7363	tags=41%, list=22%, signal=32%	RBM38/CBFA2T3/KAZALD1/NEURL4/INSIG1/FCER2/IGLC7/PLCG2/BLK/SLC44A2/SEMA4B/PLD4/PSMD3/PTPRE/TCF7/NPC1/CD79B/MPO/CX3CL1/PNKD/SIPA1L2/KLF7/VAMP4/EPHB6/PLXNB2/EIF3B/PDE8A/GTF3C2/PEA15/UBAP2L/GABARAP/SQOR/STRA6/SLC44A1/CASC3/SGK1/CCL22/CSF1R/COLGALT1/CLEC4A/SIRPA/SLC22A23/TYROBP/PTCD2/BAG3/LARP4B/PHC1/TMEM150A/ADIPOR2/GSTO1/DNAJC11/ITGB2/FGF18/LYL1/SERPINB5/RAB20/TPP1/FABP5/SURF1/MLST8/SLC51A/MRPL45/OG…
GSE32533_WT_VS_MIR17_OVEREXPRESS_ACT_CD4_TCELL_UP	GSE32533_WT_VS_MIR17_OVEREXPRESS_ACT_CD4_TCELL_UP	GSE32533_WT_VS_MIR17_OVEREXPRESS_ACT_CD4_TCELL_UP	197	0.322314	1.69616	7.94e-05	0.000844536	0.000589738	6090	tags=32%, list=18%, signal=26%	XIRP1/RBM19/TNFSF14/PWP2/UTP15/IGHA1/TWNK/AHCYL1/CSF1/ILF3/MFSD12/TNKS1BP1/TRMT1/LAMP3/WDR74/TXLNG/TSEN2/ZBTB21/RPS6KA1/ABCC1/OPN3/TRAP1/GPATCH4/VDR/CNBP/MAPK4/NIPA2/TRIM25/LINC01128/RRP15/HSPA9/AP3D1/NCL/KIAA0513/B3GNT5/CRY1/ARFGEF2/DDX28/CXXC5/STRAP/GLRX3/MRPL3/ETF1/UTP14A/NAF1/CSNK2A1/BEND3/IGF2R/RAB11FIP1/FGL2/SEL1L/GATA2/NOL10/FABP5/NUFIP1/GEMIN7/SREBF1/GLT8D2/FBXO30/MRPL20/PIGW/STAU1/IPO7
GSE32986_GMCSF_VS_GMCSF_AND_CURDLAN_LOWDOSE_STIM_DC_DN	GSE32986_GMCSF_VS_GMCSF_AND_CURDLAN_LOWDOSE_STIM_DC_DN	GSE32986_GMCSF_VS_GMCSF_AND_CURDLAN_LOWDOSE_STIM_DC_DN	193	0.320829	1.6851	7.8e-05	0.000844536	0.000589738	2567	tags=18%, list=8%, signal=16%	MDS2/RBM19/ITGA5/TNFRSF10A/DDX31/PER2/RGCC/TNFRSF10D/NUAK2/NOG/RALGPS2/TOP1MT/RPL9/SCML1/RETREG1/EFCAB13/ZBTB18/ZNF204P/XKRX/GCSAM/PLCL1/TCF7/LDLRAP1/SIN3B/ADD2/ATP1A1/CHMP7/RYK/GABBR1/REV1/ANGEL1/ZBTB40/TCEA3/ZCCHC14
GSE14769_UNSTIM_VS_40MIN_LPS_BMDM_UP	GSE14769_UNSTIM_VS_40MIN_LPS_BMDM_UP	GSE14769_UNSTIM_VS_40MIN_LPS_BMDM_UP	178	0.32226	1.67334	0.000146092	0.00141222	0.000986152	5472	tags=32%, list=16%, signal=27%	CRYAB/XIRP1/ENPP2/TEAD3/ELOVL1/AKR1C2/HES1/MEGF11/TAGLN3/RPUSD4/CCDC40/NAV3/LONRF2/PLEKHH1/SLC8B1/CPXM2/CDK20/GPATCH4/FOXF2/CD300LB/CYGB/ZNF334/MTG2/SH3BP2/LTO1/SLC20A2/FGF9/DNAJC5B/GDI1/MDGA2/ATP6AP1/KCNC3/KIAA0513/CYP27B1/TMED6/MYOF/NAV1/TWIST2/CCDC115/TLE2/MFSD5/PEX10/CBX7/SPINK4/EHD4/MFSD4A/PLCB2/MEP1A/MESD/GCNT2/MRPL4/SLC2A13/DOCK7/RCN3/EPM2AIP1/LRRK2/ZNF276
GSE32986_CURDLAN_LOWDOSE_VS_CURDLAN_HIGHDOSE_STIM_DC_DN	GSE32986_CURDLAN_LOWDOSE_VS_CURDLAN_HIGHDOSE_STIM_DC_DN	GSE32986_CURDLAN_LOWDOSE_VS_CURDLAN_HIGHDOSE_STIM_DC_DN	198	0.317584	1.6727	7.95e-05	0.000844536	0.000589738	7000	tags=39%, list=21%, signal=31%	RBPMS2/NIBAN3/SERTAD2/TMEM178A/RHOF/PHLDA1/PLK3/DOT1L/SLC7A11/JARID2/WDR74/TSR1/SF1/SRXN1/PROCR/GRHL1/PTPRE/ABCC1/SIN3B/IL1RN/ALAS1/FGR/GSPT1/NECTIN2/SQSTM1/BCL2A1/CCL2/GRWD1/CX3CL1/RABGEF1/PDGFA/TGM2/EIF6/KLF10/ITPRID2/SLC31A2/FAM20C/EML4/PLXNA2/HVCN1/MRPS18B/HERPUD1/SDC1/TMEM26/GPD2/SERPINB2/SUSD6/DNAJA2/SPI1/SOWAHC/SEC23IP/NR1H3/SLC2A6/CXCL16/DAPP1/CSF2/VASN/MET/AGRN/PTPRJ/FNBP1L/RAB12/TRAF3/S…
GSE43260_BTLA_POS_VS_NEG_INTRATUMORAL_CD8_TCELL_UP	GSE43260_BTLA_POS_VS_NEG_INTRATUMORAL_CD8_TCELL_UP	GSE43260_BTLA_POS_VS_NEG_INTRATUMORAL_CD8_TCELL_UP	200	0.316657	1.66933	8e-05	0.000844536	0.000589738	6469	tags=34%, list=19%, signal=27%	RRP12/ITGA5/NSMAF/EIF4G1/PCSK5/HMOX1/RUSC2/ATP6V0C/SLC16A6/FICD/PGM3/GCLC/FCN1/ALAS1/NPC1/UTP18/SQSTM1/PLIN2/IL1R2/VCP/TRIM16/TMEM41B/HTATIP2/HYOU1/YWHAQ/TFPI/NOTCH3/IBTK/PITPNA/EMP1/LILRB4/LYZ/GSR/BCAP31/GTPBP6/RNF4/ETF1/RRBP1/GFPT1/SEC63/HSP90B1/PPARG/TBC1D1/ALDOA/PDIA4/ATG4B/FNDC3A/CALU/HSPA5/ITGB2/LMNA/CD63/GOLGA2/KXD1/LHFPL2/FBP1/RPN1/PSMD7/MYDGF/TBC1D9B/LAMP1/TMED9/AFG3L2/CTSL/PSMC3/UAP1/TM…
GSE1791_CTRL_VS_NEUROMEDINU_IN_T_CELL_LINE_6H_UP	GSE1791_CTRL_VS_NEUROMEDINU_IN_T_CELL_LINE_6H_UP	GSE1791_CTRL_VS_NEUROMEDINU_IN_T_CELL_LINE_6H_UP	195	0.31655	1.66544	7.84e-05	0.000844536	0.000589738	7973	tags=44%, list=24%, signal=34%	ADM/ARAP3/RTN4RL2/TCF7L2/RHBDF1/ATP9B/FAM219A/SCML1/YRDC/DUSP6/TSC22D1/EREG/ACSL4/KHNYN/PTGS2/PTPN12/HK2/NPC1/NRIP1/TMEM38B/SH3GLB1/SEMA6B/BCL2A1/TRIO/LIMS1/SPATA6/SLC38A2/SLC19A2/JAKMIP2/TRIM13/ACVR1B/SWT1/MGAM/PHC2/SNX9/EMP1/TAOK3/SLAIN2/MTHFD2L/SLC11A1/WASL/PNP/PINK1/DDX60L/SH3BP5/VCAN/DCTD/FAM120AOS/PNPLA8/USP9X/CTNND1/FKBP15/VWA8/MET/RALA/LAPTM5/THRB/TMEM251/CHMP2B/LRRC8D/CCL7/DAB2/YWHAZ/PLA…
GSE6269_HEALTHY_VS_E_COLI_INF_PBMC_DN	GSE6269_HEALTHY_VS_E_COLI_INF_PBMC_DN	GSE6269_HEALTHY_VS_E_COLI_INF_PBMC_DN	154	0.325946	1.65963	0.000194162	0.00176338	0.00123136	5790	tags=31%, list=17%, signal=26%	CRYAB/ADM/DEPP1/REEP1/KLHL29/MIR22HG/PRTN3/DBH/ELANE/DLC1/CEACAM6/CLGN/POTEKP/AOC1/COL9A3/ZFAND5/BACH1/FEM1B/BPI/MPO/FKBP1A/TAGLN2/TRIM25/RPL21P2/LINC01002/SORT1/SDCBP/FTH1/GPX2/ESR1/CYBB/CD44/CCL22/FUT6/MPP2/PCDH7/PRR15L/TET3/IRAK3/CXCL8/SPINK1/DDC/FGF18/RCN3/RAB20/SULT1B1/PLAUR/DOCK6
GSE22140_GERMFREE_VS_SPF_MOUSE_CD4_TCELL_DN	GSE22140_GERMFREE_VS_SPF_MOUSE_CD4_TCELL_DN	GSE22140_GERMFREE_VS_SPF_MOUSE_CD4_TCELL_DN	200	0.314538	1.65816	8e-05	0.000844536	0.000589738	6873	tags=42%, list=21%, signal=33%	HMGA1/SERTAD2/ADM/LTBP2/IL1B/TNFSF14/MSC/TIMP1/KANK1/MIR22HG/SLC7A11/SERPINE1/MAP4K4/SFXN3/TXNRD1/EREG/SLC7A8/HPCAL1/TP53BP2/SQSTM1/PLIN2/PLEC/AKAP1/VASP/ALCAM/EIF3B/CCT2/NOTCH3/DNASE1L1/CD300C/ENG/VSIG4/MRC1/DNMBP/EMP1/SERPINB2/GNAQ/BCAP31/PNP/SLC16A3/FCMR/CSF1R/ANPEP/SH3BP5/LGALS3/EIF4A1/PI4K2A/SGTA/HSP90B1/DCTN5/CPQ/APLP2/IL7R/ELOC/RGS1/LMNA/FUS/CD180/TPD52L2/CCL7/DAB2/RPN1/YWHAZ/FABP5/NCOR2/E…
GSE11864_CSF1_VS_CSF1_IFNG_PAM3CYS_IN_MAC_DN	GSE11864_CSF1_VS_CSF1_IFNG_PAM3CYS_IN_MAC_DN	GSE11864_CSF1_VS_CSF1_IFNG_PAM3CYS_IN_MAC_DN	183	0.317778	1.65669	0.000149466	0.00142784	0.000997055	4555	tags=28%, list=14%, signal=24%	XIRP1/CSRP2/SLC25A32/NR4A3/CSF1/SERPINE1/MFSD12/TSR1/SLC5A6/IFRD2/PPP1R11/DNAJB5/URB2/COQ7/ACSL4/TRMT44/ACSL5/CCRL2/FPGS/RHBDD2/TMEM165/LINC01127/PLEKHG1/ADAM17/TGM2/SLC36A4/UST/RPF2/SAMD8/EML4/TRIM13/ARL8B/MTHFS/USP16/ANKRD18A/WDR4/EXOSC6/GRID2/ZC3H12C/HIVEP3/AXIN2/DGKH/UTP11/DLAT/LILRB3/DSE/EIF4A1/NANS/USP14/HLX/TBC1D1
GSE32034_UNTREATED_VS_ROSIGLIZATONE_TREATED_LY6C_HIGH_MONOCYTE_UP	GSE32034_UNTREATED_VS_ROSIGLIZATONE_TREATED_LY6C_HIGH_MONOCYTE_UP	GSE32034_UNTREATED_VS_ROSIGLIZATONE_TREATED_LY6C_HIGH_MONOCYTE_UP	192	0.315579	1.6563	0.000155509	0.00147114	0.0010273	6302	tags=34%, list=19%, signal=28%	ITGA5/RGCC/PLK3/PTGDS/CLCN7/SLC6A8/UBQLN1/SLC44A2/TXNRD1/KCNN4/MAP2K3/HMOX1/GCSAM/PROCR/IGF2BP2/CAPN3/NES/ABCC1/FGR/FLNB/NPC1/NOLC1/HSD11B2/MORC4/ERCC1/KCMF1/GEMIN5/ABCF2/PLXNA2/AQP9/MRPS18B/PHC2/MEMO1/SDC1/SLC19A1/ST3GAL5/GSR/VIM/SLC11A1/SCAMP3/CCR1/C12orf43/NFE2L1/ABR/MINDY1/GUCA1A/VCAN/SH2B3/C8orf37/NFIC/FARSA/CYP8B1/IL7R/POLR1A/S100A11/PDLIM7/AQP8/C5AR1/ZNF239/TIMP2/ENO1/HAL/COX18/PEF1/RRS1
GSE17974_0H_VS_72H_IN_VITRO_ACT_CD4_TCELL_UP	GSE17974_0H_VS_72H_IN_VITRO_ACT_CD4_TCELL_UP	GSE17974_0H_VS_72H_IN_VITRO_ACT_CD4_TCELL_UP	191	0.315035	1.65268	0.000154679	0.001469	0.0010258	4950	tags=29%, list=15%, signal=25%	VPS9D1/IL1B/TCF7L2/UTP15/CCDC86/MIR22HG/MAP11/ANXA1/TWNK/SLC5A6/YRDC/PCSK5/TRMT6/DGCR11/SLC25A33/ASPH/CD83/TEX45/VIPR1/FCN1/ABL2/GABBR1/TRIB1/FAM200B/ITPRIP/DNAJB9/DNAJC3/LILRB2/COQ10B/LETM1/RAPGEF1/ST3GAL5/LYZ/ZNF542P/TCTA/IL11RA/CHD9/DDX28/LMTK2/SGK1/KRT73/HES4/FCMR/FHIT/LDB2/TNFRSF21/RIOX1/ST6GALNAC1/CUX1/FGF5/ATP6V0A2/ABHD13/IL7R/ENC1/SIK1
GSE360_L_DONOVANI_VS_T_GONDII_MAC_UP	GSE360_L_DONOVANI_VS_T_GONDII_MAC_UP	GSE360_L_DONOVANI_VS_T_GONDII_MAC_UP	185	0.316253	1.65255	0.000150331	0.00143329	0.00100086	4671	tags=29%, list=14%, signal=25%	CLDN14/AQP3/DCHS1/TBKBP1/PLK3/IL1B/INSIG1/TNFSF14/SMYD5/IGHA1/TTLL4/ATP9B/RRN3/SERPINE1/ITPKC/HMOX1/URB2/HK2/ZNF185/TRIO/PAX2/LASP1/ZNF629/CALCOCO1/ALDH1B1/ANXA5/KLF10/GALK2/CCDC22/SERINC1/ALDH3B1/CCT6B/GABARAP/TRAM2/PIK3CB/SERPINB2/CCR1/ST3GAL6/MFSD5/SPART/MBTPS2/NR1H3/VCAN/LAMB3/ZNF202/AMPD3/AKAP8/KIAA0232/CLBA1/MAP4K5/ACP2/PDIA4/CAPN7
GSE43863_TH1_VS_LY6C_INT_CXCR5POS_MEMORY_CD4_TCELL_UP	GSE43863_TH1_VS_LY6C_INT_CXCR5POS_MEMORY_CD4_TCELL_UP	GSE43863_TH1_VS_LY6C_INT_CXCR5POS_MEMORY_CD4_TCELL_UP	196	0.312894	1.64652	0.000157704	0.00148041	0.00103377	4517	tags=28%, list=14%, signal=24%	HMGA1/HOMER1/DDX31/SMYD5/GEMIN4/ATF3/IFRD2/ST6GALNAC4/TRMT6/TSEN2/RABGGTA/SLC25A33/CLIP1/URB2/SLC7A6/PXN/SRSF6/PPAT/EIF4E/NOC3L/TMEM165/BCL2A1/RRP9/IFNLR1/GRWD1/PUS1/NAA25/MFHAS1/NSUN2/SLC16A1/GLS/POLR3D/ANKRD28/IDH3A/NUS1/UTP6/BCCIP/ANKRD40/ABCF2/WDR4/UTP4/BRIX1/MTRR/EPOP/AIMP2/MAK16/PNPT1/CD44/CCT6A/ETF1/C7orf50/UTP14A/PLBD2/RIOX1/NAA50
GSE22033_UNTREATED_VS_MRL24_TREATED_MEF_DN	GSE22033_UNTREATED_VS_MRL24_TREATED_MEF_DN	GSE22033_UNTREATED_VS_MRL24_TREATED_MEF_DN	192	0.313628	1.64607	0.000155509	0.00147114	0.0010273	6173	tags=36%, list=18%, signal=30%	CHRD/CFB/ARAP3/MICALL2/CASS4/AKAP12/NKAIN1/STK38L/SLC25A32/SYP/LRRC49/SF1/CTTN/TOPORS/NPC1/TP53BP2/TMEM43/ATN1/EIF4E/RAB1A/SNED1/GALNS/NEBL/TOR1B/PRR16/SRSF5/HSPA9/FASTKD2/EIF6/KCNC4/CTNNA1/FAM83E/EML4/RAB2A/USP16/RAPGEF1/ST3GAL5/ZNF143/GALNT6/CDV3/LMTK2/AFF4/PPFIBP1/SH3BP5/SH2B3/ZNF202/AKAP8/GHITM/RAPGEF6/REN/USP9X/TET3/UBE2W/DCTN5/CUX1/KIAA0753/APLP2/RHEB/GALNT12/BTG2/EPHB4/C5AR1/ZNF189/BEX1/RB…
GSE32986_UNSTIM_VS_GMCSF_STIM_DC_UP	GSE32986_UNSTIM_VS_GMCSF_STIM_DC_UP	GSE32986_UNSTIM_VS_GMCSF_STIM_DC_UP	197	0.311755	1.64059	0.000158718	0.00148221	0.00103503	4860	tags=24%, list=15%, signal=21%	GGT7/SIAH3/DDX31/TNFRSF10D/NOG/RALGPS2/TOP1MT/MAP11/RPL9/SCML1/EFCAB13/ZNF204P/XKRX/SF1/CHML/SPPL2B/PLCL1/SLC8B1/ZFYVE9/RPGR/EDAR/FAM117B/EPHX2/LDLRAP1/SIN3B/ATP1A1/PFN2/CHMP7/KLF3-AS1/TCEA3/PITPNM2/CCDC88A/ATP11C/C12orf42/RNF216/FHIT/GPRASP1/MINDY1/ZNF540/SETMAR/MAML2/SARAF/WDPCP/SLC25A37/VWA8/CNKSR2/DIP2B
GSE29618_BCELL_VS_PDC_UP	GSE29618_BCELL_VS_PDC_UP	GSE29618_BCELL_VS_PDC_UP	193	0.31195	1.63846	0.000155994	0.00147287	0.0010285	2261	tags=20%, list=7%, signal=19%	CXCR5/CD79A/FCRL2/IGHG1/CD19/ABCB4/IGKC/HES1/FCER2/POU2AF1/HLA-DOB/PLCG2/PAX5/IGKV3-20/PKIG/IGKV1D-13/CDK14/MS4A1/CD83/ADD2/PTPN12/HK2/BANK1/BACH1/ST6GAL1/CHMP7/RAB30/CD79B/NT5E/NOC3L/BCL2A1/TRIO/RYK/IGHD/ADAM28/PIKFYVE/KLF7/QRSL1/RASA3
GSE23114_WT_VS_SLE2C1_MOUSE_SPLEEN_B1A_BCELL_UP	GSE23114_WT_VS_SLE2C1_MOUSE_SPLEEN_B1A_BCELL_UP	GSE23114_WT_VS_SLE2C1_MOUSE_SPLEEN_B1A_BCELL_UP	199	0.310888	1.63768	0.000159681	0.00148221	0.00103503	7244	tags=38%, list=22%, signal=30%	GEM/PER2/EGR2/IL1B/DUSP14/ZPR1/TNFSF14/LRRC8B/AHCYL1/UTP25/ATF1/CA2/ATF3/MAP2K3/PNO1/QPCT/SPAG9/URB2/ABCE1/HBEGF/NPC1/CD200/UTP18/EIF4E/BCL2A1/ADAM17/PSMD14/EIF4G2/EBNA1BP2/DIMT1/PEA15/GNAI1/CEP170/EEF1E1/CYCS/PNP/WDR43/AIMP2/MAK16/PPP2CA/CCT6A/IPO5/GHITM/PGAM1/TNF/FUT4/PAICS/ATP6V0A2/PSMD1/CALU/SYNCRIP/DHX16/TMEM251/HNRNPAB/GLIPR1/IL1RAP/WDR1/EIF2S1/IPO7/MLEC/WDR47/CTSL/RRS1/ZNF195/TFAM/UAP1/LRR…
GSE6259_DEC205_POS_DC_VS_BCELL_UP	GSE6259_DEC205_POS_DC_VS_BCELL_UP	GSE6259_DEC205_POS_DC_VS_BCELL_UP	129	0.330058	1.63614	0.000919118	0.00629809	0.00439794	4109	tags=24%, list=12%, signal=21%	HMGA1/GSTM2/REEP1/MEOX1/MEGF6/ABCA9/CACNB2/FGFR3/SHPK/ALG13/GNG7/CSPG4/HPCAL1/ITGAD/SLC7A14/RS1/FGFR4/GPR3/AQP6/MYOZ3/KCNJ11/FGF9/DNAJC5B/CD276/CNKSR1/COQ9/HPN/FZD8/CACNA1G/GPSM1/ECEL1
GSE36476_CTRL_VS_TSST_ACT_16H_MEMORY_CD4_TCELL_OLD_DN	GSE36476_CTRL_VS_TSST_ACT_16H_MEMORY_CD4_TCELL_OLD_DN	GSE36476_CTRL_VS_TSST_ACT_16H_MEMORY_CD4_TCELL_OLD_DN	198	0.310571	1.63576	0.000158957	0.00148221	0.00103503	8240	tags=43%, list=25%, signal=33%	HOMER1/DNAJA3/GEMIN4/LAMP3/STIP1/DPH2/UTP20/TXN/ALAS1/PUS7/TRAP1/VDR/PDCD11/IARS1/TKT/IL1R2/VCP/TUBB6/BMS1/POLR3D/PPAN/NOP16/SLC43A3/MLYCD/EIF6/CTNNA1/EBNA1BP2/PEA15/CLCC1/SEH1L/NDUFAF4/MYOF/GOT2/SEPTIN10/CREG1/AIMP2/PSMD2/GATB/CCL22/LRRK1/PGAM1/PPP2CB/BTBD3/PAICS/ATP6V0A2/BYSL/WDR12/KYNU/ARHGAP22/SLC15A3/JPT2/FABP5/TALDO1/PHB/CD40/CORO1C/ZNF189/MRPL20/ZNF239/TUBA1C/WARS1/WDR3/SLC3A2/C1QBP/TXNL1/…
GSE5542_UNTREATED_VS_IFNA_TREATED_EPITHELIAL_CELLS_6H_DN	GSE5542_UNTREATED_VS_IFNA_TREATED_EPITHELIAL_CELLS_6H_DN	GSE5542_UNTREATED_VS_IFNA_TREATED_EPITHELIAL_CELLS_6H_DN	195	0.310827	1.63533	0.000156703	0.00147386	0.00102919	4411	tags=25%, list=13%, signal=22%	SDK2/CARMIL1/SERTAD2/HOOK1/CYP2J2/TCF7L2/PUS3/SNX16/NOG/MMP28/TOP1MT/WDR73/ADGRE4P/ZFYVE16/APP/TRIM2/SPPL2B/PLCL1/SLC7A8/SLC8B1/ATL1/IGF1R/ACTN1/LEF1/TMEM38B/CHMP7/SNTG2/CAMSAP2/ZC3H12B/GABBR1/ZNF84/ANGEL1/SPATA6/IL17RA/PPM1N/CLUAP1/MSRA/PGBD4/RMDN2/FUNDC2/ANKRD46/PPFIBP1/RBM43/SPART/DDX60L/ZNF485/RAPGEF6/C8orf37/TP73-AS1
GSE4748_CTRL_VS_LPS_AND_CYANOBACTERIUM_LPSLIKE_STIM_DC_3H_DN	GSE4748_CTRL_VS_LPS_AND_CYANOBACTERIUM_LPSLIKE_STIM_DC_3H_DN	GSE4748_CTRL_VS_LPS_AND_CYANOBACTERIUM_LPSLIKE_STIM_DC_3H_DN	193	0.310317	1.62989	0.000233991	0.00205913	0.00143789	5763	tags=31%, list=17%, signal=26%	COL6A3/FGFRL1/PLK3/NPPC/CIB2/TCF7L2/TSPAN9/KANK3/SERPINE1/MAP2K3/PDE2A/SRXN1/XIAP/SCIN/IL17RC/PIM3/MGAT4B/EPHX2/FADS3/BOP1/LPO/GSPT1/TOR1AIP2/PLIN2/SORBS1/TUBB6/MMP19/ACO2/ALCAM/S100A16/IDH3A/PEG10/MMP13/SNAI1/DGAT2/STARD4/MCRIP2/AKR1B1/LAS1L/HADHA/INHBA/RASAL2/LRRK1/LIG3/NOMO1/COL11A2/GSN/CDK18/ZMIZ1/TNFRSF21/FSTL3/APLP2/ACSS2/HMGCR/TALDO1/PPCS/ATP6V0A1/LPL/PLAUR/ATF7
GSE36826_NORMAL_VS_STAPH_AUREUS_INF_SKIN_UP	GSE36826_NORMAL_VS_STAPH_AUREUS_INF_SKIN_UP	GSE36826_NORMAL_VS_STAPH_AUREUS_INF_SKIN_UP	195	0.309481	1.62825	0.000156703	0.00147386	0.00102919	7160	tags=37%, list=21%, signal=29%	ARAP3/FILIP1L/OLR1/MSC/MYCL/STK38L/MIR22HG/TTLL4/SLC7A11/TCIRG1/MAP4K4/RNF41/TXNRD1/LAMP3/KCNN4/DUSP6/DNAJB5/SLC16A6/FLNA/FCN1/BACH1/ATP1A1/TMEM43/PGD/SRC/U2AF2/MTF1/UBIAD1/ADGRE2/ALCAM/CCR7/GDI1/ANXA5/EIF6/AQP9/PITPNA/C5AR2/CST6/ABHD2/PNP/HNRNPM/TMEM158/PSMA1/ST3GAL6/CD101/SLC25A37/FRY/CXCL8/PSMD1/CD53/PACSIN2/PDLIM7/KYNU/GLIPR1/HMGCR/NAMPT/ACVR2A/DUS2/FOS/SLC3A2/DGKD/CRLF2/PSMC3/PSMA3/YKT6/NME1…
GSE21360_PRIMARY_VS_QUATERNARY_MEMORY_CD8_TCELL_UP	GSE21360_PRIMARY_VS_QUATERNARY_MEMORY_CD8_TCELL_UP	GSE21360_PRIMARY_VS_QUATERNARY_MEMORY_CD8_TCELL_UP	172	0.314104	1.62396	0.000212419	0.00190942	0.00133335	5663	tags=34%, list=17%, signal=28%	ZCCHC2/EGR2/ANKRD55/DOT1L/SLC6A8/SERPINE1/ATF3/ADGRE4P/SRXN1/LONRF3/SLC7A1/TTYH2/FLNA/PDLIM4/CPEB4/IL1RN/CD83/ALAS1/SQSTM1/CCL2/CD300LB/PTGR1/TRIM25/ANXA5/CLEC4D/GDF15/TFRC/ODC1/MMP13/RASA4/PACS2/CYBB/EMP1/DUSP9/FBXO32/SLC11A2/CLIC4/NR2F6/ZC3H12C/MYOF/SLAMF7/WASF1/ZNFX1/ANPEP/LGALS3/PPARG/CLEC4E/MET/RGS1/LMNA/PTPRJ/LGALS3BP/LRP12/CD180/CD9/GSTM1/ATP6V0A1/LPL
GSE21033_CTRL_VS_POLYIC_STIM_DC_6H_UP	GSE21033_CTRL_VS_POLYIC_STIM_DC_6H_UP	GSE21033_CTRL_VS_POLYIC_STIM_DC_6H_UP	194	0.30862	1.62282	0.000311915	0.00261619	0.00182688	7195	tags=39%, list=22%, signal=31%	ICAM5/CD79A/HSPB7/PLA2G4C/PPARD/DDX21/ADNP2/ZPR1/TNFSF14/HMG20B/ZFYVE16/SF1/DNAJB5/NUMB/TSPAN1/ACSL5/TOPORS/BACH1/NPC1/SQSTM1/NT5E/IL1R2/DHX15/RABGEF1/ERCC1/ARHGAP5/NAPG/TMEM41B/DLG4/GOLT1B/HSPA9/BTBD7/ANXA5/FAM83E/USP16/WDR4/MATK/ST3GAL5/ZNF143/RPL23AP53/CEP170/CDV3/ZBTB43/AFF4/PPFIBP1/SIRPA/EIF4A1/FCGR2C/RAPGEF6/UBE2W/DCTN5/RHEB/IL7R/PLAGL1/AQP8/DYRK2/ATF7/PICALM/CPA4/LEPROT/SLC3A2/COPS2/UBAP1/…
GSE25088_IL4_VS_IL4_AND_ROSIGLITAZONE_STIM_STAT6_KO_MACROPHAGE_DAY10_DN	GSE25088_IL4_VS_IL4_AND_ROSIGLITAZONE_STIM_STAT6_KO_MACROPHAGE_DAY10_DN	GSE25088_IL4_VS_IL4_AND_ROSIGLITAZONE_STIM_STAT6_KO_MACROPHAGE_DAY10_DN	194	0.308341	1.62136	0.000311915	0.00261619	0.00182688	6176	tags=31%, list=18%, signal=26%	CFB/ZCCHC2/DDX21/ADNP2/SPHK1/INSIG1/TNFSF14/HLA-DOB/NR4A3/MAP4K4/MT1G/CXCL5/BTBD19/CYSTM1/PROCR/MRGPRX3/ABCC1/CPEB4/IL1A/ATP6V1G1/FGR/NRIP1/SRC/CHI3L2/RAB1A/BCL2A1/MTF1/RABGEF1/ADAM17/AC093583.1/WSB1/ZNF438/LINC00884/JAKMIP2/TFRC/MYBPH/NRIP3/TRAM1/INHBA/PSMA1/SPART/SH3BP5/MAML2/PLEKHM2/MGAT1/CXCL16/PNPLA8/CHST7/C5orf51/CCDC93/HSPA5/CD63/TRAF3/OSTM1/EIF1B/SNX10/OGFRP1/UBE2Z/SLC25A13/LYN/TAP2
GSE4984_LPS_VS_VEHICLE_CTRL_TREATED_DC_UP	GSE4984_LPS_VS_VEHICLE_CTRL_TREATED_DC_UP	GSE4984_LPS_VS_VEHICLE_CTRL_TREATED_DC_UP	180	0.311485	1.62042	0.000147482	0.00142013	0.000991671	6558	tags=35%, list=20%, signal=28%	RRP12/SDK2/TMEM259/CYP2J2/ENPP2/MEGF6/ATP6V1E2/TBXA2R/NOG/FCSK/C16orf74/UBXN11/RRP1/SYN2/SLC7A8/DNAJC22/ACTN1/PROCR/FAM117B/TCF7/LDLRAP1/AAMP/CHMP7/KLF3-AS1/SNTG2/UBIAD1/PITPNM2/PRKAR1B/SALL4/SLC19A1/ESYT2/LMLN/KSR2/EBAG9/KRT73/GJB6/HSD11B1/RAPGEF6/SLC25A37/FSTL3/PTPN6/SNORD46/BAIAP2/MRM1/BTBD3/TTC9/RFX2/PIGP/KLHL3/ATP8A2/IGF2R/KRT72/SELL/FBP1/SETD6/MLST8/COQ8A/ACBD4/BACH2/THOP1/RCAN3/PCED1A/POU2…
GSE22886_NAIVE_VS_IGG_IGA_MEMORY_BCELL_UP	GSE22886_NAIVE_VS_IGG_IGA_MEMORY_BCELL_UP	GSE22886_NAIVE_VS_IGG_IGA_MEMORY_BCELL_UP	186	0.309893	1.61988	0.00022662	0.00202958	0.00141725	6646	tags=35%, list=20%, signal=28%	LARGE1/TCL1A/DSP/ABCB4/ACVR2B-AS1/MMP17/CR2/FCER2/CORO2B/DHX34/PCDH9/MAP11/SLC6A8/MYO15B/KLF9/UXS1/CHML/DGCR11/RAB15/TSPAN13/DDR1/BCL7A/OLFML2A/UGT8/HYAL1/POLR3C/MTMR9/IGHD/GABBR1/TREML2/SH3BP2/LRCH1/UGDH/PEG10/MGAM/AQP9/ZNF318/AFF4/PPFIBP1/GPRASP1/MITF/NR1H3/RAPGEF6/PHC1/SMURF1/EHD4/APLP2/GTF3C4/DCLK2/C6orf120/ZNF112/DNASE1L3/CHMP2B/APOOL/ATP6V0A1/VAV3/DGKD/ACBD4/INTS6/YBX3/BACH2/IRS2/ACE2/ZNF13…
KAECH_NAIVE_VS_DAY8_EFF_CD8_TCELL_UP	KAECH_NAIVE_VS_DAY8_EFF_CD8_TCELL_UP	KAECH_NAIVE_VS_DAY8_EFF_CD8_TCELL_UP	200	0.306505	1.61581	0.000240058	0.00205913	0.00143789	5283	tags=28%, list=16%, signal=24%	RBM38/CYP2J2/RFLNB/RGCC/EGR2/POU2AF1/HLA-DOB/RALGPS2/RETREG1/WDR74/APP/TCF4/KCNN4/TSR1/DUSP6/CCR9/CHERP/IGF1R/CLIP1/TSPAN13/TCF7/LEF1/ST6GAL1/TLR6/NSG2/ATP13A1/IPO4/SIPA1L2/MFHAS1/DVL1/MAP7/SURF6/IL6R/CCR7/XPC/PAN2/OVGP1/MAP4K3/SLC11A2/NDUFAF4/PHETA1/SLC44A1/CXXC5/DNTT/NIT2/NOMO1/MAT2A/AMPD3/GSN/FBXO21/DDC/IL7R/FAM102A/WFS1/EVI5/PISD/SELL
GSE22935_UNSTIM_VS_24H_MBOVIS_BCG_STIM_MYD88_KO_MACROPHAGE_UP	GSE22935_UNSTIM_VS_24H_MBOVIS_BCG_STIM_MYD88_KO_MACROPHAGE_UP	GSE22935_UNSTIM_VS_24H_MBOVIS_BCG_STIM_MYD88_KO_MACROPHAGE_UP	199	0.306647	1.61534	0.000239521	0.00205913	0.00143789	6632	tags=34%, list=20%, signal=27%	MIDN/PDGFB/PUS3/FCRL1/WBP2/SPRED2/ZBTB18/MAP2K3/HMOX1/MAPKAPK5/ATP6V0C/TUSC1/ZBTB21/ABCC1/MLXIP/CD83/TMEM43/GFOD1/RAB1A/IL1R2/CD300LB/PTGR1/MAFK/DVL1/GPAT3/ERCC1/SIDT2/SLC41A2/ZNF438/PXDC1/LAT/FTH1/OPLAH/FBXL3/KIAA1522/RNF24/PPP1R13B/SLAIN2/B3GNT5/GNAQ/AIFM2/ABHD2/PRDM4/ITPRIPL2/EDEM1/USP31/SOWAHC/ROCK2/DNTTIP1/GFPT1/PNPLA8/DAPP1/RHOQ/NKIRAS2/PIP4K2C/RAB20/AKAP6/XPOT/TAX1BP1/TNIP1/EPHA2/PLEK/RAB1…
GSE5589_WT_VS_IL10_KO_LPS_STIM_MACROPHAGE_45MIN_DN	GSE5589_WT_VS_IL10_KO_LPS_STIM_MACROPHAGE_45MIN_DN	GSE5589_WT_VS_IL10_KO_LPS_STIM_MACROPHAGE_45MIN_DN	197	0.306803	1.61453	0.000158718	0.00148221	0.00103503	9009	tags=46%, list=27%, signal=34%	INPP5F/HMGA1/ZCCHC2/MYRF/RAI14/UBQLN1/ATF1/TCIRG1/WDR74/PTPRE/CDK20/UTP18/CHMP7/AKAP1/MMP19/ARHGAP5/ESF1/PLCD1/SORT1/SLC41A2/ESAM/TSPAN17/ALDH1B1/CCDC88A/LAT/GOLGA7/CD300C/SDC1/ALDH3B1/MATK/TMEM69/TIAM1/MFSD4B/AK8/TMEM158/CDKN2AIP/COLGALT1/GOLGA5/TSPAN3/C8orf37/BAG3/GDF9/PPIP5K1/IMPACT/LARP4B/REL/ARHGAP12/CSRNP2/CELSR1/PGRMC1/CAVIN1/MIEF1/VOPP1/DOCK7/FAM43A/DENND4B/SNX33/CAVIN3/SLC25A13/RNPC3/SH3…
GSE33425_CD8_ALPHAALPHA_VS_ALPHABETA_CD161_HIGH_TCELL_UP	GSE33425_CD8_ALPHAALPHA_VS_ALPHABETA_CD161_HIGH_TCELL_UP	GSE33425_CD8_ALPHAALPHA_VS_ALPHABETA_CD161_HIGH_TCELL_UP	198	0.306453	1.61407	0.000238436	0.00205913	0.00143789	5502	tags=30%, list=16%, signal=25%	CD79A/CBFA2T3/RFLNB/CD19/NEURL4/PLK3/FCRLA/BCL6/POU2AF1/RYR1/IGLC7/HLA-DOB/RALGPS2/PLCG2/WBP2/SLC44A2/SPIB/TCF4/PKIG/FICD/NDEL1/MS4A1/PI4KA/RALB/CD79B/TOR1B/PCID2/EIF4G2/ZNF385A/PITPNA/SNX9/ZNF143/NFYC/MYADM/SPI1/CCL22/NFE2L1/CHUK/NCF2/SH2B3/ADCK1/MGAT1/GSTM3/GSN/LDB2/NR1H2/PMPCA/FUT4/RHOQ/ZFX/ZNF398/STARD3/FEM1A/WFS1/IQGAP1/PISD/SELL/LYL1/NRAP/BCL2L2
GSE14769_UNSTIM_VS_60MIN_LPS_BMDM_DN	GSE14769_UNSTIM_VS_60MIN_LPS_BMDM_DN	GSE14769_UNSTIM_VS_60MIN_LPS_BMDM_DN	198	0.306325	1.6134	0.000238436	0.00205913	0.00143789	6567	tags=34%, list=20%, signal=28%	SLC25A25/GEM/EGR2/TOB1/PHLDA1/IL1B/NUAK2/SPRY2/ATF3/ITPKC/VPS37C/CCDC40/RASGEF1B/ACSL3/OTUD1/NDEL1/HLA-B/ZFAND5/CD83/PTGS2/CCRL2/FEM1C/NRIP1/SQSTM1/BCL2A1/DHX15/IRGQ/RABGEF1/NRROS/KLF7/DDX5/SLC38A2/WSB1/ARHGEF2/GDF15/TRIM13/ODC1/MMP13/USP16/HERPUD1/RAPGEF1/VIM/ZC3H12C/CCDC71L/SLAMF7/SGK1/DNAJA2/ETF1/SOWAHC/NFKBIE/KLF6/GJA1/REL/CLEC4E/ATL2/BTG2/SPRYD7/CCL7/RAB20/PLAUR/RNASE10/PICALM/FOS/PLEK/WDR47…
GSE24142_EARLY_THYMIC_PROGENITOR_VS_DN2_THYMOCYTE_UP	GSE24142_EARLY_THYMIC_PROGENITOR_VS_DN2_THYMOCYTE_UP	GSE24142_EARLY_THYMIC_PROGENITOR_VS_DN2_THYMOCYTE_UP	198	0.305742	1.61033	0.000238436	0.00205913	0.00143789	6218	tags=37%, list=19%, signal=30%	GEM/RFLNB/ABCB4/RAI14/TGIF2/TNFSF14/PRTN3/ANXA1/FCRL1/CA2/APP/DUSP6/TSC22D1/GCSAM/ITGAX/PROCR/PTPRE/ABCC1/TLCD2/NIBAN2/LDLRAP1/ARRDC4/MEF2A/STARD8/CCND1/DOCK5/IL1R2/MPO/ADAM17/VSIR/ZNF521/PLXNB2/OGFRL1/SPECC1/RAP2A/NEK6/ACVR1B/AQP9/ST3GAL2/MYADM/LMO2/CD44/CD34/C11orf54/CD52/LRRK1/CSF1R/MITF/SIRPA/TYROBP/GSTM3/MAP4K5/RHOQ/ATP8A2/FAM102A/RGS1/GCNT2/ITGB2/HHEX/DOCK7/RAMP2/FGL2/CD180/GLIPR1/GATA2/CD3…
GSE6092_UNSTIM_VS_IFNG_STIM_ENDOTHELIAL_CELL_UP	GSE6092_UNSTIM_VS_IFNG_STIM_ENDOTHELIAL_CELL_UP	GSE6092_UNSTIM_VS_IFNG_STIM_ENDOTHELIAL_CELL_UP	199	0.305301	1.60825	0.000239521	0.00205913	0.00143789	6886	tags=36%, list=21%, signal=28%	VAT1L/B4GALNT4/PLK3/ELOVL1/DTX1/SHC4/TRMT61A/CCDC86/MIR22HG/MAP11/UBQLN1/DDX3X/TSR1/SYVN1/SLC16A6/RAB11FIP4/TP53INP2/YTHDF1/NDEL1/ABCE1/FADS3/COPG1/GPATCH4/PGD/VCP/TNFRSF12A/USO1/HSPA9/PDE8A/ARL8B/RAP2A/NEK6/PAFAH1B2/CRYBG2/DLAT/SLC10A7/DNAJA2/RMDN2/AKIRIN1/EIF4A1/C1orf122/KPNA1/IDE/ARPC1B/RNASEK/TNFRSF21/PREPL/ATAD3A/CD164/MESD/WDR12/GTF2A1/ATP2A2/STX18/CYP51A1/COMMD10/ARF1/RAB20/XPOT/APTX/OGDH/…
GSE11057_NAIVE_VS_CENT_MEMORY_CD4_TCELL_UP	GSE11057_NAIVE_VS_CENT_MEMORY_CD4_TCELL_UP	GSE11057_NAIVE_VS_CENT_MEMORY_CD4_TCELL_UP	186	0.307487	1.6073	0.00022662	0.00202958	0.00141725	5910	tags=30%, list=18%, signal=24%	SERTAD2/HOOK1/EFNA1/RFLNB/NEURL4/TAF4B/DACT1/NOG/SCML1/RETREG1/ZBTB18/CHML/IGF1R/PKIG/EDAR/DDR1/REG4/COBLL1/MLXIP/MATN1-AS1/CHMP7/KLF3-AS1/SFXN4/PADI4/AC107884.1/LEF1-AS1/CCR7/PITPNM2/TMEM198B/SNX9/CERS6/OCRL/SLC11A2/RNF175/KRT73/SGK2/C11orf1/PJVK/TSPAN3/TARBP1/MAML2/RNF227/RAPGEF6/C8orf37/SLC25A37/CNKSR2/EEA1/GP2/SLC25A25-AS1/SULT1B1/ADAMTS12/ATP6V0A1/LGR5/SREBF1/RIN1
GSE22886_NEUTROPHIL_VS_DC_DN	GSE22886_NEUTROPHIL_VS_DC_DN	GSE22886_NEUTROPHIL_VS_DC_DN	200	0.30378	1.60145	0.000240058	0.00205913	0.00143789	9617	tags=48%, list=29%, signal=35%	FCER2/POP4/EIF4G1/CCDC47/SLC7A8/TMX2/STIP1/OPN3/TXN/GCLC/ADO/ZNF804A/UTP18/TMEM165/ATP13A1/VCP/PSMD14/GLS/MRPS35/SYPL1/HSPA9/ANXA5/VDAC2/CTNNA1/PEA15/GPX3/RREB1/GOT2/TIAM1/TRAM1/CANX/CDC42BPB/MITF/TSPAN3/ATP6V1F/TUFM/GSN/RIOX1/TIMM10B/FBXO21/EHD4/PSMD1/IMP4/CSNK2A1/RALA/LRRC8D/M6PR/DAB2/TPP1/NCOR2/LRPPRC/RNH1/MTREX/CEBPA/NDUFS1/NIPSNAP2/PSMA3/SOAT1/CAPN2/KTN1/DNM1L/ZFYVE21/RAN/MRPL40/NDUFAB1/PSMC…
GSE17721_0.5H_VS_4H_GARDIQUIMOD_BMDC_DN	GSE17721_0.5H_VS_4H_GARDIQUIMOD_BMDC_DN	GSE17721_0.5H_VS_4H_GARDIQUIMOD_BMDC_DN	193	0.304565	1.59968	0.000233991	0.00205913	0.00143789	7363	tags=39%, list=22%, signal=31%	CHRD/CARMIL1/RAI14/NPPC/STAC2/SAV1/UFM1/SLCO5A1/CSF1/MSANTD3/TNKS1BP1/ATF3/ZFYVE16/NUMB/RUSC2/PLPP7/PIM3/CLDN3/RABGEF1/ADAM17/VASP/TGM2/POLR3D/PDE8A/RXYLT1/GDI1/NUS1/IL17RA/HVCN1/SERINC1/SLC25A29/HECTD1/SLC44A1/RND3/LPP/ABR/RARS1/EIF4A1/LPAR1/KPNA1/KLF6/RUFY3/HSP90B1/MAP4K5/ACP2/ALKBH3/CRK/VCL/IFNAR1/SYNCRIP/ZNF565/CAVIN4/PDLIM7/NAMPT/ENTR1/PLAUR/ZNF189/ANTXR2/LYN/TNFRSF1B/ME1/STX12/CLTC/TM9SF4/S…
GSE5542_UNTREATED_VS_IFNG_TREATED_EPITHELIAL_CELLS_24H_DN	GSE5542_UNTREATED_VS_IFNG_TREATED_EPITHELIAL_CELLS_24H_DN	GSE5542_UNTREATED_VS_IFNG_TREATED_EPITHELIAL_CELLS_24H_DN	198	0.303583	1.59895	0.000238436	0.00205913	0.00143789	8132	tags=40%, list=24%, signal=31%	SERTAD2/CYP2J2/E2F5/MEGF6/NOG/C16orf74/ZNF204P/SPPL2B/TSEN2/ATL1/DPH2/IGF1R/ACTN1/PPP1R2P1/TFB2M/EPHX2/LDLRAP1/ARRDC4/CHMP7/NT5E/EIF4E/NOC3L/SNTG2/GABBR1/ZNF84/ANGEL1/SPATA6/TCEA3/SYPL1/PRKAR1B/ARHGEF2/PPM1N/PLXNA2/CLUAP1/AKR1B1/DDX28/LMLN/ZNF333/NARS1/GJB6/MRPL3/RAPGEF6/C8orf37/FARSB/MFSD4A/ZFP3/SCRN1/ACSS2/FBP1/ENTR1/SULT1B1/TCEAL1/ZBTB9/SREBF1/TIMP2/NRCAM/RRS1/BACH2/CYTH4/PCED1A/NMNAT3/TSPAN32…
GSE3982_MAST_CELL_VS_MAC_DN	GSE3982_MAST_CELL_VS_MAC_DN	GSE3982_MAST_CELL_VS_MAC_DN	192	0.304564	1.59849	0.000311018	0.00261619	0.00182688	8601	tags=43%, list=26%, signal=32%	PPARD/RAI14/NAGPA/TNFSF14/CLCN7/USP12/CXCL5/SLC6A12/SLC7A8/CSPG4/SPAG9/FLNA/ZNF804A/ATP1A1/ATN1/GALNS/TUBB6/MTF1/ITGAM/DEF8/TRIM25/TNFRSF12A/CLPTM1/PHACTR2/ALCAM/DOCK3/CTNNA1/EML4/ENG/GLRX2/ARMT1/KCNJ1/MATK/HIVEP3/MRTFB/RNF40/INHBA/EEF1AKMT3/GPT/MITF/NANS/GTF2IRD1/INF2/ASPHD1/HLX/ACP2/RHOQ/VWA8/CELSR1/RHEB/ELOC/NEU3/PPP2R3A/DAB2/LTBR/WAPL/PDXK/UBAP1/RAB17/TMED5/ME1/RXRA/IMPDH1/PSMD12/ADAM9/KMO/UC…
GSE19401_RETINOIC_ACID_VS_RETINOIC_ACID_AND_PAM2CSK4_STIM_FOLLICULAR_DC_UP	GSE19401_RETINOIC_ACID_VS_RETINOIC_ACID_AND_PAM2CSK4_STIM_FOLLICULAR_DC_UP	GSE19401_RETINOIC_ACID_VS_RETINOIC_ACID_AND_PAM2CSK4_STIM_FOLLICULAR_DC_UP	185	0.305538	1.59656	0.000300661	0.00255196	0.00178202	7241	tags=39%, list=22%, signal=31%	KCTD15/ENPP2/PER2/ACTN2/CD19/ANKRD55/CASS4/MSC/DKK2/LRRC8B/STK38L/TRHDE/SLC25A32/ACVR1/MAP2K3/TSC22D1/SHOX2/NDEL1/HPCAL1/F2RL1/CD200/ADAMTS8/CCND1/PDCD11/OTUD4/GABBR1/TRIM25/TNFRSF12A/ZNF334/PDGFA/GLS/MAP7/SPSB1/RRP15/BTBD7/SMOX/ACVR1B/RCOR1/MATK/BBOF1/CHGA/MAT2A/SH2B3/GFPT1/BAIAP2/MAPK1IP1L/ATG4B/CSGALNACT2/DOK5/SIK1/VPS37A/SNAP91/CBARP/PPP2R3A/RASAL1/NIT1/BZW1/RIN1/BEX1/EIF2AK3/ARC/KRT4/EGR4/LY…
GSE24574_BCL6_HIGH_TFH_VS_NAIVE_CD4_TCELL_DN	GSE24574_BCL6_HIGH_TFH_VS_NAIVE_CD4_TCELL_DN	GSE24574_BCL6_HIGH_TFH_VS_NAIVE_CD4_TCELL_DN	200	0.302754	1.59603	0.000240058	0.00205913	0.00143789	7131	tags=36%, list=21%, signal=28%	GEM/HOMER1/IL1B/DUSP14/ZPR1/NSMAF/SPRY2/FSCN1/TSC22D2/CA2/ATF3/ZFYVE16/MAP2K3/PNO1/PPRC1/RPGR/URB2/NDEL1/HBEGF/ADO/CD200/UTP18/PGD/BCL2A1/PLEC/TOR1B/ADAM17/PSMD14/GLS/EBNA1BP2/DIMT1/EMG1/PEA15/MATK/VIM/EEF1E1/SERPINB2/CYCS/IPO5/PGAM1/CCT5/TNF/BAIAP2/PAICS/PSMD1/CALU/CHSY1/TMEM251/HNRNPAB/ARF1/PSMD7/IL1RAP/WDR1/EIF2S1/MYDGF/NUP160/IPO7/NUBP1/ZNF195/UAP1/CDK17/LRRFIP1/BIK/LIG4/ATP6V1A/KLHL9/IL2/ATP…
GSE20484_MCSG_VS_CXCL4_MONOCYTE_DERIVED_MACROPHAGE_UP	GSE20484_MCSG_VS_CXCL4_MONOCYTE_DERIVED_MACROPHAGE_UP	GSE20484_MCSG_VS_CXCL4_MONOCYTE_DERIVED_MACROPHAGE_UP	195	0.303295	1.5957	0.000313406	0.00261906	0.00182888	6037	tags=31%, list=18%, signal=26%	CLDN14/ADM/PPARD/TGIF2/TWNK/ZMIZ1-AS1/TXNRD1/LINC00963/ZNF703/IFRD2/TSC22D1/SLC7A8/CHCHD4/RAB34/CHST15/DBH-AS1/MCAT/ZNF219/TRMT44/FGR/CNST/PDSS1/PTGR1/OAF/TGM2/SLC36A4/FHAD1/HSPA9/MPDU1/SLC43A3/GTF3C2/FASTKD2/IL17RA/SHE/PFKFB4/SEMA4G/COL8A2/ST3GAL5/SLC37A2/POLR1C/XPR1/SLC49A3/MITF/TSPAN3/TRBV7-3/RARS1/FAIM/TUFM/PHC1/LINC00968/APLP2/WDR12/LRP12/KXD1/EPHB4/CCL7/XPOT/MYDGF/CLEC11A/SPNS1/COG2
GSE11057_NAIVE_VS_EFF_MEMORY_CD4_TCELL_UP	GSE11057_NAIVE_VS_EFF_MEMORY_CD4_TCELL_UP	GSE11057_NAIVE_VS_EFF_MEMORY_CD4_TCELL_UP	197	0.303205	1.5956	0.000238076	0.00205913	0.00143789	4840	tags=24%, list=14%, signal=21%	GGT7/SERTAD2/AFF3/EFNA1/TAF4B/DACT1/NOG/TOP1MT/ALS2CL/RNF157-AS1/DENND2D/ZBTB18/PCSK5/SLC8B1/IGF1R/ACTN1/EDAR/DBH-AS1/FAM117B/DDR1/TCF7/MEF2A/FLNB/LEF1/CCDC110/CHMP7/CHI3L2/KBTBD11/PADI4/KLF7/TMEM41B/LEF1-AS1/PITPNM2/TMEM198B/CERS6/MTHFD2L/FCMR/GPRASP1/TARBP1/MAML2/RAPGEF6/SLC25A37/CRTC3/KLHL2/TET3/KLHL3/CNKSR2
GSE22919_RESTING_VS_IL2_IL12_IL15_STIM_NK_CELL_UP	GSE22919_RESTING_VS_IL2_IL12_IL15_STIM_NK_CELL_UP	GSE22919_RESTING_VS_IL2_IL12_IL15_STIM_NK_CELL_UP	197	0.303068	1.59488	0.000238076	0.00205913	0.00143789	7736	tags=40%, list=23%, signal=31%	RBM19/HOMER1/HIC2/TRMT61A/DOT1L/FARP2/GEMIN4/EIF4G1/DUS4L/MFSD12/IFRD2/TSEN2/DPH2/TLCD2/MSANTD2/UBQLN4/TMEM165/DHX15/PUS1/REV1/ESF1/EEF1AKNMT/KCMF1/GEMIN5/EIF3B/PDE8A/RXYLT1/CMAS/RSL1D1/DIMT1/ARL8B/USP16/UBAP2L/WDFY1/MCRIP2/CLIC4/HIVEP3/CDV3/BRIX1/PPP2CA/FASN/PBDC1/MAT2A/ZNF202/STAM2/RPL7L1/MIEF1/AGAP3/USP10/TPD52L2/SPRYD7/HM13/KPNB1/MRPL20/HYAL2/MED17/EPHA2/DCTPP1/TRUB2/RTN3/PRPF4/POGK/EIF5A/CEB…
GSE22886_NAIVE_BCELL_VS_MONOCYTE_UP	GSE22886_NAIVE_BCELL_VS_MONOCYTE_UP	GSE22886_NAIVE_BCELL_VS_MONOCYTE_UP	181	0.306191	1.59414	0.000147493	0.00142013	0.000991671	3349	tags=24%, list=10%, signal=21%	LARGE1/TCL1A/CD79A/DSP/VPREB3/FCRL2/RUBCNL/MIR600HG/CD19/ABCB4/IGKC/TAF4B/CR2/POU2AF1/CORO2B/HLA-DOB/NOS1/POU6F1/UTP25/PNOC/PAX5/SPIB/TSPAN13/DDR1/COBLL1/IGKV1D-13/BCL7A/MS4A1/BANK1/CD200/SLC9A7/CD79B/MOXD1/IGHD/MORC4/MYOZ3/UST/RHPN1-AS1/PEG10/IGLV1-44/IGLL3P/GTPBP3/RPL23AP53
GSE3039_CD4_TCELL_VS_ALPHABETA_CD8_TCELL_DN	GSE3039_CD4_TCELL_VS_ALPHABETA_CD8_TCELL_DN	GSE3039_CD4_TCELL_VS_ALPHABETA_CD8_TCELL_DN	199	0.302535	1.59368	0.000239521	0.00205913	0.00143789	6483	tags=35%, list=19%, signal=28%	TMEM17/AKR1E2/MYCL/ASAP2/TSR1/CHCHD4/PIM3/SNAI3/IGF2BP2/RTN1/NIBAN2/AKR7A2/OPN3/HBEGF/IL20RB/NECTIN2/DAG1/NRIP1/CCND1/MRAS/IL1R2/YWHAG/AKAP1/TAGLN2/MFHAS1/SPATA6/PLCD1/PTPRS/EIF3B/SLC39A1/CCR7/URB1/NAB2/RSL1D1/PPARGC1B/MTX1/TMBIM1/TFRC/FAM20C/METTL1/SLC19A1/SPRED1/SLC11A2/SERPINB2/GOT2/WDR43/MAK16/DPYSL2/TOMM20/ANPEP/RAB7A/ACAT2/SIGMAR1/RHOQ/MYO1E/CD274/PLXNA1/LRP12/MDH2/NEURL2/PTGES3/SHTN1/LAMP1…
GSE6674_ANTI_IGM_VS_ANTI_IGM_AND_CPG_STIM_BCELL_DN	GSE6674_ANTI_IGM_VS_ANTI_IGM_AND_CPG_STIM_BCELL_DN	GSE6674_ANTI_IGM_VS_ANTI_IGM_AND_CPG_STIM_BCELL_DN	197	0.302832	1.59363	0.000238076	0.00205913	0.00143789	5901	tags=34%, list=18%, signal=28%	HOOK1/HOMER1/CDKN1A/TGIF2/UTP15/SMYD5/CCDC86/DNAJA3/UBQLN1/TMCO3/GEMIN4/UTP25/TXNRD1/WDR74/MYBBP1A/IFRD2/CHCHD4/PIM3/BOP1/HBEGF/HK2/UTP18/NOLC1/FKBP1A/BMS1/NIP7/PPAN/NOC2L/EIF3B/SYPL1/HSPA9/IDH3A/GOLGA7/FNIP2/EBNA1BP2/DIMT1/AQP9/SPRED1/MRPS10/EEF1E1/GPD2/MAK16/NARS1/TMEM158/MAT2A/LARS1/DCTD/SLC52A2/C7orf50/TGFB1/HEMK1/TNF/ATAD3A/FARSB/BYSL/AGPAT3/ELP1/LARP4/LRP12/MFSD2A/NOL10/SLC39A6/XPOT/PHB/EIF…
GSE32128_INOS_DEPENDENT_VS_INOS_INDEPENDENT_ACTIVATED_TCELL_UP	GSE32128_INOS_DEPENDENT_VS_INOS_INDEPENDENT_ACTIVATED_TCELL_UP	GSE32128_INOS_DEPENDENT_VS_INOS_INDEPENDENT_ACTIVATED_TCELL_UP	193	0.303234	1.59269	0.000311988	0.00261619	0.00182688	5460	tags=28%, list=16%, signal=24%	MMP1/DSP/HMGA1/KAZALD1/MYRF/TGIF2/PKP2/RALGPS2/JARID2/WBP2/LSR/PIP5K1B/ZNF622/DDX19B/DNPEP/PKIG/PIM3/CFD/HLA-B/DOCK5/RAB1A/MAPK6/P2RX6/GRIN3B/PLCD1/CYP2S1/HYOU1/LRRC59/ANXA5/ITPRID2/ARL8B/OVGP1/RCOR1/TBC1D23/DNM1/AKR1B1/NFYC/SLC11A2/SERPINB2/RND3/ZNF518B/GPRASP1/GSTM3/TGFB1/PI4K2A/ADIPOR2/ENPP3/STAM2/RNF19A/RHOBTB2/TTC1/GPCPD1/RIOK3/HOXB13/SEL1L
GSE32986_UNSTIM_VS_CURDLAN_LOWDOSE_STIM_DC_UP	GSE32986_UNSTIM_VS_CURDLAN_LOWDOSE_STIM_DC_UP	GSE32986_UNSTIM_VS_CURDLAN_LOWDOSE_STIM_DC_UP	199	0.301447	1.58794	0.000239521	0.00205913	0.00143789	7689	tags=41%, list=23%, signal=32%	HOMER1/PLK3/TAF4B/SEMA7A/KLF9/IFRD2/PROCR/URB2/SLC7A6/ABCC1/SIN3B/IL1RN/CCRL2/ALAS1/RANBP2/RIOX2/SRC/UBQLN4/TNFAIP8L1/BMS1/RARA/EIF3B/CCR7/FASTKD2/PXDC1/UTP6/TAF1A/BCCIP/SLC31A2/TMBIM1/FAM20C/EML4/DIMT1/RBM12/ODC1/HERPUD1/SPINT1/NDUFAF4/SERPINB2/UTP4/BRIX1/SLC2A6/DCTD/TGFB1/CCT5/HEMK1/NAA15/CRTC3/S100A6/MAPK1IP1L/PDIA4/FNDC3A/NOL8/MET/CDH1/ATP2A2/SRFBP1/CYP51A1/JPT2/MTAP/AARD/PSMD7/ACVR2A/CUL2/TI…
GSE17974_1.5H_VS_72H_IL4_AND_ANTI_IL12_ACT_CD4_TCELL_UP	GSE17974_1.5H_VS_72H_IL4_AND_ANTI_IL12_ACT_CD4_TCELL_UP	GSE17974_1.5H_VS_72H_IL4_AND_ANTI_IL12_ACT_CD4_TCELL_UP	198	0.301229	1.58656	0.000238436	0.00205913	0.00143789	6053	tags=29%, list=18%, signal=24%	RRP12/GEM/HIC2/PLK3/FBRSL1/NAGPA/PUS3/SMCR8/SLC25A32/NR4A3/BTBD19/YRDC/TRMT6/SLC16A6/URB2/FAM117B/TCF7/ELMO2/CD83/FLNB/SRSF6/CHMP7/MTMR9/LTV1/RASA3/RRP15/RBSN/CCR7/MTUS1/MGAM/COQ10B/DCTN6/EXOSC6/RAB11FIP2/GOSR1/C12orf43/PIK3CA/RAPGEF6/TNF/CRTC3/CRK/ZFX/HCG18/IL7R/FAM102A/ENC1/C6orf120/PSMA3-AS1/MX2/ELOA/BTG2/FYTTD1/C1orf198/USPL1/PIGW/RB1CC1/MAP3K2
GSE17580_UNINFECTED_VS_S_MANSONI_INF_TEFF_UP	GSE17580_UNINFECTED_VS_S_MANSONI_INF_TEFF_UP	GSE17580_UNINFECTED_VS_S_MANSONI_INF_TEFF_UP	196	0.301415	1.58612	0.000315408	0.00263128	0.00183742	6309	tags=31%, list=19%, signal=25%	STAT6/CD79A/TLE1/ADM/IL1B/FCRLA/DTX1/CR2/HLA-DOB/BLK/FCRL1/SPIB/NUMB/TSC22D1/STIP1/ACTN1/FLNA/MS4A1/CARM1/PUS7/DAG1/CCND1/CD79B/IPO4/ANGEL1/EEF1AKNMT/ZBTB7B/MLX/ANKRD40/ACVR1B/KCTD5/AVL9/PRPF8/SUSD6/ZNFX1/PTK6/IQSEC1/DHX38/PTCRA/VPS18/AKIRIN1/AMPD3/PTPN6/BYSL/ASB5/IL7R/KLHL21/IGF2R/ACSS2/LRRK2/ATF7/GTF2H3/TMEM9B/MEF2C/EIF2AK3/RB1CC1/LYN/PANX1/PTDSS1/ACP5/LMBRD1
GSE3982_EOSINOPHIL_VS_DC_DN	GSE3982_EOSINOPHIL_VS_DC_DN	GSE3982_EOSINOPHIL_VS_DC_DN	198	0.300986	1.58528	0.000238436	0.00205913	0.00143789	8159	tags=44%, list=24%, signal=34%	STAT6/ABCB4/RAI14/FCER2/EIF4G1/LIMS2/ATF3/PCSK5/ASPH/IL1RN/ST13/CD83/HPCAL1/ATP6V1G1/DHRS9/ADO/CARD9/GBAP1/GRWD1/MFHAS1/PDGFA/PLXNB2/ALCAM/CCDC88A/CTNNA1/MTX1/TFRC/CD1D/METTL1/CERS6/CYP27B1/VAC14/ATP6V1H/ACO1/ABRAXAS2/PNP/TRAM1/GATB/CDC42BPB/CCNA1/PKM/SETMAR/DCTD/HSPA8/PPARG/FBXO21/TMEM53/EHD4/CELSR1/KDM7A/ITGB1BP1/CUL4A/MMS19/RHEB/IFT74/NACC2/LRRC8D/KYNU/PPP2R3A/SLC15A3/RPN1/CBR1/FASTKD1/TBC1D9B…
GSE37301_HEMATOPOIETIC_STEM_CELL_VS_LYMPHOID_PRIMED_MPP_DN	GSE37301_HEMATOPOIETIC_STEM_CELL_VS_LYMPHOID_PRIMED_MPP_DN	GSE37301_HEMATOPOIETIC_STEM_CELL_VS_LYMPHOID_PRIMED_MPP_DN	162	0.308957	1.58462	0.000604392	0.00447507	0.00312493	5952	tags=30%, list=18%, signal=24%	GSTM2/PKP2/PWP2/RDH12/SNCAIP/TPBG/BTBD19/YRDC/ACVR1/SYVN1/CAMKK1/PSMD3/SLC25A33/TWSG1/UTP20/PSMC6/RELT/PGD/EIF4E/WFDC21P/VCP/CCT2/RNMT/TMED1/SLC25A29/CERS6/CRY1/C18orf32/CYCS/MTRR/ITPRIPL2/CCL22/VCAN/PAPSS2/LPAR1/PCDH7/ALG12/ELOC/ARMH3/PAPSS1/BCL2L2/USP2/RAB10/STXBP1/MRPL45/FBXO30/GTF2H3/PICALM
GSE5589_IL6_KO_VS_IL10_KO_LPS_AND_IL6_STIM_MACROPHAGE_45MIN_DN	GSE5589_IL6_KO_VS_IL10_KO_LPS_AND_IL6_STIM_MACROPHAGE_45MIN_DN	GSE5589_IL6_KO_VS_IL10_KO_LPS_AND_IL6_STIM_MACROPHAGE_45MIN_DN	195	0.301158	1.58446	0.000313406	0.00261906	0.00182888	8240	tags=41%, list=25%, signal=31%	INPP5F/MYRF/TBXA2R/SPHK1/SLC7A11/ATF1/LIMS2/ST6GALNAC4/IGF2BP2/NIBAN2/ELMO2/IL1A/ANGPTL4/TMEM165/GFRA2/NIPA2/TRIM25/TAX1BP3/TSPAN17/SRPRA/RPF2/DNAJB9/GOLGA7/FAM20C/ENG/TRAF3IP2/PLOD3/COQ10B/TMEM69/DNAAF5/TIAM1/AK8/CLEC4A/MINDY1/BAG3/IMPACT/LARP4B/ARHGAP12/UBE2W/ZBTB1/ATP6V0A2/BCAR3/MIEF1/DIP2B/CSGALNACT2/GSTZ1/C12orf66/LARP4/TSPAN7/IER5L/P3H2/ITPR1/FAM110C/SHTN1/SDF4/CLCN5/CLEC7A/ACY3/DIP2C/TPCN2…
GSE36476_CTRL_VS_TSST_ACT_16H_MEMORY_CD4_TCELL_YOUNG_DN	GSE36476_CTRL_VS_TSST_ACT_16H_MEMORY_CD4_TCELL_YOUNG_DN	GSE36476_CTRL_VS_TSST_ACT_16H_MEMORY_CD4_TCELL_YOUNG_DN	198	0.299349	1.57666	0.000238436	0.00205913	0.00143789	8025	tags=44%, list=24%, signal=34%	FILIP1L/MSRB1/TWNK/LAMP3/IFRD2/DPH2/FLII/MAPK13/CD83/TXN/ALAS1/PUS7/ADO/TRAP1/CD200/VDR/PDCD11/CLUH/CYP1B1/VCP/TUBB6/BMS1/IPO4/MFN2/NIP7/EEF1AKNMT/EIF3B/YWHAQ/SLC43A3/IDH3A/CCT2/CTNNA1/SLC31A2/PEA15/RBM47/NDUFAF4/EEF1E1/MYOF/CYCS/CREG1/AIMP2/CCL22/SEPHS2/MFSD5/TYROBP/CLN5/IPO5/PGAM1/TNF/STAM2/PAICS/ATP6V0B/FARSA/BYSL/NETO2/IGSF3/NOP14/CYP51A1/FABP5/TALDO1/MRPL20/SND1/TUBA1C/ENO1/WDR3/DCTPP1/WDR77…
GSE26030_TH1_VS_TH17_DAY5_POST_POLARIZATION_DN	GSE26030_TH1_VS_TH17_DAY5_POST_POLARIZATION_DN	GSE26030_TH1_VS_TH17_DAY5_POST_POLARIZATION_DN	195	0.299148	1.57388	0.000391757	0.00318638	0.00222504	3822	tags=23%, list=11%, signal=21%	IFT140/PER2/ARHGAP24/DTX1/TAF4B/PWP2/CR2/HES1/ELL3/GEMIN4/CHKA/DENND2D/BTBD19/SPRED2/SEMA4B/DDX19B/CAMKK1/RASGEF1B/C8orf58/ABCE1/ABCC1/CD83/CARM1/FGR/SLC23A2/IARS1/NOC3L/ADAM17/SIPA1L2/NSUN2/RRP15/URB1/ALDH1B1/PXDC1/ATP6AP1/INO80C/TMEM26/SLC44A1/UTP4/HIVEP3/CDV3/BAMBI/MTRR/ACACA/SLC29A3
GSE10325_BCELL_VS_LUPUS_BCELL_UP	GSE10325_BCELL_VS_LUPUS_BCELL_UP	GSE10325_BCELL_VS_LUPUS_BCELL_UP	179	0.301621	1.56834	0.000293406	0.00249472	0.00174205	7129	tags=35%, list=21%, signal=28%	RRP12/DSP/IGHG1/POF1B/MIR600HG/CYP4F11/ATP9B/SLC6A8/KANK3/LIMS2/KCNN4/CLDN7/CCDC40/RPH3AL/UNC5B/PGC/MRAS/CHMP7/NEBL/GABBR1/UBIAD1/TMEM63A/AKR7A3/TCTN1/TP53AIP1/BTBD7/ASPSCR1/SHH/HPN/GPD2/CST6/RAB40A/TMEM158/LAMC3/SLC25A37/ASPHD1/TNF/ABCB8/TMEM53/CD1C/PITX1/MYO1E/HSPB2/KLK1/SLC26A10/FNBP1L/LHFPL2/FBP1/HMHB1/NKRF/MIA/BAIAP3/CTRB2/FAM234B/PYCR3/CNNM4/PAIP2B/APBA2/RNASEL/WDR25/LTA4H/KCND3/NFATC4
GSE22196_HEALTHY_VS_OBESE_MOUSE_SKIN_GAMMADELTA_TCELL_DN	GSE22196_HEALTHY_VS_OBESE_MOUSE_SKIN_GAMMADELTA_TCELL_DN	GSE22196_HEALTHY_VS_OBESE_MOUSE_SKIN_GAMMADELTA_TCELL_DN	199	0.297371	1.56647	0.000239521	0.00205913	0.00143789	6023	tags=33%, list=18%, signal=27%	HMGA1/GEM/DPYSL3/IL1B/OLR1/TNFSF14/MSC/KANK1/STK38L/MIR22HG/THBD/SERPINE1/SFXN3/ATF3/TXNRD1/DNAJB5/CD83/HPCAL1/MEF2A/CLUH/PLIN2/PLEC/LIMS1/TMEM41B/HYOU1/ICOSLG/ALCAM/SHB/PEA15/ENG/PLOD3/MRC1/DNMBP/EMP1/MATK/SERPINB2/BCAP31/MPHOSPH6/ZBTB43/PNP/SLC16A3/ANPEP/ATP9A/SH3BP5/EIF4A1/AMPD3/PI4K2A/USP14/PPARG/CXCL8/CRK/PSMD1/ENC1/LMNA/FUS/CD180/TPD52L2/LHFPL2/CCL7/YWHAZ/FABP5/GAS2L1/PLAUR/NCOR2/TNIP1/PDXK
GSE17974_CTRL_VS_ACT_IL4_AND_ANTI_IL12_48H_CD4_TCELL_UP	GSE17974_CTRL_VS_ACT_IL4_AND_ANTI_IL12_48H_CD4_TCELL_UP	GSE17974_CTRL_VS_ACT_IL4_AND_ANTI_IL12_48H_CD4_TCELL_UP	187	0.299525	1.56628	0.000455166	0.00362348	0.00253027	5299	tags=25%, list=16%, signal=21%	MDS2/ENPP2/AC093642.2/VPS9D1/TOB1/MEGF6/BMP1/MIR22HG/GREM1/MAP4K4/SCML1/PCSK5/TSC22D1/KIFC2/EVI2B/OTUD1/SLC7A6/DSC1/DHRS9/CNST/ITGAM/LINC02223/ARHGAP21/FAM200B/ITPRIP/LILRB1/DNAJB9/DNAJC3/OVGP1/LYZ/IL11RA/LMTK2/SGK1/KRT73/GPRASP1/HLA-DRB6/FAM199X/TYROBP/BAG3/GPRASP2/HYKK/CUX1/IL7R/ENC1/SIK1/MUL1/SLC25A25-AS1
GSE40274_CTRL_VS_SATB1_TRANSDUCED_ACTIVATED_CD4_TCELL_DN	GSE40274_CTRL_VS_SATB1_TRANSDUCED_ACTIVATED_CD4_TCELL_DN	GSE40274_CTRL_VS_SATB1_TRANSDUCED_ACTIVATED_CD4_TCELL_DN	164	0.304652	1.56553	0.000541748	0.00412406	0.00287982	7526	tags=43%, list=23%, signal=33%	RRP12/PLK3/TMEM17/UFM1/DUS4L/MYBBP1A/YRDC/ST6GALNAC4/TRMT6/SRXN1/JADE3/NIBAN2/BOP1/IL1A/GCLC/ADO/RANBP2/MAFK/PTPRS/TBL2/CCR7/NAB2/JAGN1/SMOX/IGLON5/KCNC3/DGAT2/NRIP3/MRPS18B/VAMP3/CDV3/BAMBI/SOX7/NARS1/DLK1/RARS1/EIF4A1/SLC2A6/IDE/GFPT1/PMPCA/GCN1/NAF1/KLHL21/MESD/WDR12/PISD/LRRC8D/QTRT2/NR1D2/PSMD7/XPOT/STXBP1/SURF2/LSG1/EIF2S1/COQ8A/SLC3A2/TRUB2/PSMA3/MAPKAPK3/MATR3/PSMB5/PRMT3/TBL3/PUF60/EFTUD…
GSE17974_0.5H_VS_72H_IL4_AND_ANTI_IL12_ACT_CD4_TCELL_UP	GSE17974_0.5H_VS_72H_IL4_AND_ANTI_IL12_ACT_CD4_TCELL_UP	GSE17974_0.5H_VS_72H_IL4_AND_ANTI_IL12_ACT_CD4_TCELL_UP	195	0.297536	1.5654	0.000391757	0.00318638	0.00222504	6580	tags=32%, list=20%, signal=26%	DDX21/TCF7L2/TAF4B/ADNP2/NAGPA/SMCR8/ANXA1/DDX3X/TCF4/ALG13/ZNF746/SLC8B1/ABHD5/AHCTF1/TP53INP2/PXN/MLXIP/ELMO2/IKZF5/SRSF6/DAG1/NRIP1/CHMP7/LTV1/PARP6/FAM200B/RBSN/ITPRIP/DNAJB9/GOLGA7/OGFRL1/ZHX1/COQ10B/TCTA/MTHFD2L/PRDM4/RAB11FIP2/KRT73/IQSEC1/SETMAR/RAPGEF6/CRTC3/SMURF1/MAPK1IP1L/CUX1/NOL8/FEM1A/DDX20/POLR1A/JMJD1C/ELOA/BTG2/USPL1/TMEM9B/PIGW/VAV3/RB1CC1/ATG14/NELL2/KDM6A/FAM160B2/SOAT1
GSE17721_12H_VS_24H_PAM3CSK4_BMDC_UP	GSE17721_12H_VS_24H_PAM3CSK4_BMDC_UP	GSE17721_12H_VS_24H_PAM3CSK4_BMDC_UP	194	0.296706	1.56017	0.000467873	0.00367047	0.00256308	8491	tags=43%, list=25%, signal=32%	SLC25A25/GEM/CBFA2T3/CDKN1A/OLR1/RHOC/MOB3B/NR4A3/GPC3/ITGAX/QPCT/ACTN1/EIF1AX/UTP20/ATP6V1G1/PSMC6/FGR/NECTIN2/UTP18/NAA20/APBB2/MAPK6/MFHAS1/NOL6/ALCAM/RRP15/LRRC59/PLIN3/KLF10/GOLGA7/NEK6/HVCN1/MAP4K3/MAP2/TAOK3/EEF1E1/PTBP1/ABHD2/INHBA/ACVRL1/ANPEP/ARHGAP10/S100A6/ITGB1BP1/SGCB/CALR/ISOC1/GFM1/NAMPT/TMEM9B/TIMP2/CD151/BCLAF1/GNA13/SLC3A2/CLEC7A/KLRC2/DOK1/MYD88/RBMS1/CD84/CAPN2/E2F6/BRD2/IFIT…
GSE5589_LPS_VS_LPS_AND_IL10_STIM_IL10_KO_MACROPHAGE_180MIN_DN	GSE5589_LPS_VS_LPS_AND_IL10_STIM_IL10_KO_MACROPHAGE_180MIN_DN	GSE5589_LPS_VS_LPS_AND_IL10_STIM_IL10_KO_MACROPHAGE_180MIN_DN	191	0.29716	1.5589	0.000386698	0.00316488	0.00221003	6935	tags=34%, list=21%, signal=27%	ITGA5/OCSTAMP/CASS4/NAGPA/BABAM2/RYR1/SAMD5/EFR3B/NFRKB/RNF41/SLC9A3R2/APP/KCNN4/GNG7/MAP6/JAG1/RABGGTA/NES/EDN1/ABCC1/PSD3/DNAH12/FEM1B/TNFRSF17/STON2/ZNF334/MBD2/MPV17L2/PDE8A/MRPS23/SRPRA/TDP2/LIMK1/PFKFB4/CAND2/RPTOR/SQOR/SPR/GTPBP6/TGFB1/PLBD2/C5orf51/CD164/RHOBTB2/WFS1/SELL/GATA2/ICAM4/CD40/PTPRA/TIMP2/MED17/PANX1/SH3TC1/SPRYD3/CRLF2/MMP9/DIP2C/TGFBI/SNX15/TM9SF4/GALNT1/CPNE2/TEX22
GSE5542_UNTREATED_VS_IFNA_AND_IFNG_TREATED_EPITHELIAL_CELLS_6H_UP	GSE5542_UNTREATED_VS_IFNA_AND_IFNG_TREATED_EPITHELIAL_CELLS_6H_UP	GSE5542_UNTREATED_VS_IFNA_AND_IFNG_TREATED_EPITHELIAL_CELLS_6H_UP	188	0.29779	1.55849	0.000457736	0.00362893	0.00253407	6231	tags=30%, list=19%, signal=25%	ANKRD18B/CARMIL1/TNFRSF10D/AKR1E2/UBQLN1/NFRKB/ZSWIM1/ADGRE4P/ZBTB18/RPUSD4/UXS1/ACTN1/LDLRAP1/MORC2/ASAP1/DSC1/CNST/LEF1/CHMP7/KLF3-AS1/SNED1/CAMSAP2/AKAP1/TMEM45B/RASA3/TCEA3/IL6R/UBQLN2/SLC26A11/NEK6/ATP11C/PALM3/AXIN2/TAPT1/FHIT/ANKRD16/MINDY1/MAT2A/EIF3A/DAPP1/FLVCR2/CRTC3/PTPN6/KLHL3/SORBS3/MDN1/ADGRE1/CDH1/SELL/ACVR2A/SULT1B1/RIC3/OGDH/ITPKB/RMND5B/NELL2/LGALS14
GSE17721_ALL_VS_24H_PAM3CSK4_BMDC_UP	GSE17721_ALL_VS_24H_PAM3CSK4_BMDC_UP	GSE17721_ALL_VS_24H_PAM3CSK4_BMDC_UP	192	0.296447	1.55589	0.000466527	0.00367047	0.00256308	9100	tags=45%, list=27%, signal=33%	SLC5A2/CCDC86/ANXA1/CSF1/CA2/TACSTD2/KCNN4/MRTO4/SLC7A8/ITGAX/QPCT/IL1RN/UTP20/HBEGF/ATP6V1G1/FGR/UTP18/RRP9/FKBP1A/MAPK6/TUBB6/RBM3/EBNA1BP2/MYBPH/ADAMTSL5/VIM/GPX3/IL11RA/COLGALT1/MITF/ANPEP/MAT2A/LGALS3/RRBP1/ARHGAP10/TGFB1/UBE2E1/TMEM150A/CD53/HSPA5/IL7R/IGF2R/SGCB/ITPR1/LPL/SNX12/PLAUR/UAP1L1/BRI3/ATAD2B/TIMP2/SLC25A13/CLCN5/CRLF2/CLEC7A/EIF5A/SEC61A1/MYD88/HTT/CAPN2/PTPRO/TRAF5/SGK3/UBL4A/Z…
GSE35825_UNTREATED_VS_IFNG_STIM_MACROPHAGE_UP	GSE35825_UNTREATED_VS_IFNG_STIM_MACROPHAGE_UP	GSE35825_UNTREATED_VS_IFNG_STIM_MACROPHAGE_UP	196	0.295197	1.55339	0.00039426	0.00319606	0.0022318	6288	tags=34%, list=19%, signal=28%	ZCCHC2/ITGA5/ADM/TMEM178A/RHOF/CDKN1A/CCL24/OCSTAMP/RAI14/FILIP1L/NR4A3/SEMA7A/SLC7A11/JARID2/MESP1/EHD3/AVPI1/RASGEF1B/JAG1/ACTN1/PROCR/GRHL1/HLA-B/IL1RN/HBEGF/CD83/IL1A/PTGS2/PTPN12/HK2/CD200/DMKN/BCL2A1/TOR1AIP2/TUBB6/SH3BP2/PCYT1A/CCDC88A/GDF15/CYBB/GSR/SLC11A2/CLIC4/SERPINB2/SLAMF7/SLC16A3/ZNFX1/NFKBIE/SLC2A6/CLN5/AMPD3/IRAK3/VCL/AGRN/CHI3L1/PTPRJ/CLEC6A/DYRK2/SPRYD7/USP54/VAV3/GNA13/RHBDF2/…
GSE43863_TFH_VS_LY6C_LOW_CXCR5NEG_EFFECTOR_CD4_TCELL_DN	GSE43863_TFH_VS_LY6C_LOW_CXCR5NEG_EFFECTOR_CD4_TCELL_DN	GSE43863_TFH_VS_LY6C_LOW_CXCR5NEG_EFFECTOR_CD4_TCELL_DN	193	0.29573	1.55327	0.000467982	0.00367047	0.00256308	8614	tags=45%, list=26%, signal=33%	RBPMS2/VPREB3/RHOF/TNFRSF13C/EGR2/CD27/NXPH3/MIR22HG/NR4A3/BLK/KANK3/RETREG1/CTXN1/WNT10A/DUSP6/MAP2K3/LONRF3/RASGEF1B/CREB5/GRHL1/IGF2BP2/WNT1/SCN1A/F2RL1/METTL7B/STARD8/ADAMTS10/IL1R2/ABCD1/TRIB1/SLC17A9/ALCAM/NAB2/ITPRID2/TMEM74B/FSTL5/ZC3H12C/HIVEP3/MLANA/TGFB1/NRGN/ATP6V0B/VCL/MYO1E/WFS1/PLAGL1/LRRC8D/M6PR/RAB20/SLC15A3/FABP5/KCNK13/IL33/CD33/UAP1L1/BEX1/EGR3/RMND5B/PLEK/CHST11/RENBP/RPS6KA2…
GSE22886_CD4_TCELL_VS_BCELL_NAIVE_DN	GSE22886_CD4_TCELL_VS_BCELL_NAIVE_DN	GSE22886_CD4_TCELL_VS_BCELL_NAIVE_DN	185	0.297225	1.55312	0.000601323	0.00445913	0.0031138	3318	tags=21%, list=10%, signal=19%	LARGE1/TCL1A/MIR600HG/ZNF468/CD19/CR2/POU2AF1/CORO2B/GGA1/PLCG2/HDAC9/TCF4/PIP5K1B/EHD3/PPEF2/TSPAN13/DDR1/CDK14/MS4A1/BANK1/CD200/SLC9A7/CD79B/MTMR9/MOXD1/TRIO/NEBL/ITGB3/GABBR1/MYOZ3/LINC00339/TULP2/TREML2/SOGA1/UST/UGDH/PEG10/COLEC12/GTPBP3
GSE29618_MONOCYTE_VS_PDC_UP	GSE29618_MONOCYTE_VS_PDC_UP	GSE29618_MONOCYTE_VS_PDC_UP	198	0.294578	1.55152	0.000317914	0.00264314	0.0018457	8160	tags=41%, list=24%, signal=31%	TCF7L2/TIMP1/BCL6/ANXA1/RCBTB2/PCSK5/HMOX1/ITGAX/QPCT/CREB5/EVI2B/LILRA2/PXN/IL1RN/HBEGF/LST1/HK2/FGR/BCL2A1/TKT/CYP1B1/MBD2/TRIB1/PYGL/SDCBP/SLC31A2/CD1D/SLC6A6/ALDH3B1/CREG1/CD44/SPI1/CSF1R/CLEC4A/SIRPA/LILRB3/PKM/NCF2/BEST1/TYROBP/LGALS3/FCGR2C/KLHL2/IRAK3/CXCL8/APLP2/KDM7A/CHSY1/S100A11/ITGB2/LILRA1/NACC2/SERINC5/FGL2/RAB20/NAMPT/C5AR1/CD33/TIMP2/CEBPA/CTSL/CLEC7A/TNFRSF1B/YBX3/IRS2/CAPN2/RXR…
GSE33292_DN3_THYMOCYTE_VS_TCF1_KO_TCELL_LYMPHOMA_UP	GSE33292_DN3_THYMOCYTE_VS_TCF1_KO_TCELL_LYMPHOMA_UP	GSE33292_DN3_THYMOCYTE_VS_TCF1_KO_TCELL_LYMPHOMA_UP	196	0.294791	1.55125	0.00039426	0.00319606	0.0022318	6245	tags=33%, list=19%, signal=27%	STAT6/PWP2/CR2/CLCN7/HLA-DOB/MMP10/UTP25/MAP4K4/CA2/KLF9/NCLN/PNO1/DNPEP/SLC6A12/PKIG/ABCE1/MS4A1/TXN/GCLC/TRAP1/MT1A/ST6GAL1/CHI3L2/LGALS2/IGHD/CYP1B1/GABBR1/DAZL/ABCF2/TFRC/CD1D/HMBS/TRAF3IP2/MRPS18B/CYBB/SPINT1/MATK/TICAM1/EEF1E1/CREG1/WDR43/CD44/FCMR/CD52/POLD4/SH3BP5/IQSEC2/CD1C/EVI2A/CELSR1/IMP4/ITGB2/HHEX/SELL/AQP8/TBC1D9/ITPR1/TCEAL1/SRRD/RNH1/NDUFAF1/SLC25A13/RMND5B/PLEK/C1QBP
GSE3982_MAC_VS_BCELL_UP	GSE3982_MAC_VS_BCELL_UP	GSE3982_MAC_VS_BCELL_UP	195	0.294561	1.54975	0.000470109	0.00367047	0.00256308	8652	tags=46%, list=26%, signal=34%	CDKN1A/PLPPR2/CTNS/SCG5/BCL6/BMP1/KCNS3/NR4A3/DLC1/AHCYL1/DUSP7/TCIRG1/TACSTD2/NUMB/CSPG4/PROCR/CD83/FCN1/HNRNPH2/GALNS/CDA/PHACTR2/SPSB1/DOCK3/CMAS/CTNNA1/ITPRID2/EML4/DTX2/CYP27B1/PSEN1/OCRL/TAOK3/SQOR/PIK3CB/GPD2/ACO1/SLC11A1/INHBA/AFF4/LPP/DPYSL2/RASAL2/ATP9A/GFPT1/ZMIZ1/ASPHD1/ACP2/TMEM53/RHEB/ELOC/PLXNA1/MICAL2/GCNT2/PAPSS1/LRRC8D/PPP2R3A/TALDO1/ABCC3/PDXK/TMEM184C/TNPO3/TGOLN2/MYD88/ACOT7/…
KAECH_NAIVE_VS_MEMORY_CD8_TCELL_UP	KAECH_NAIVE_VS_MEMORY_CD8_TCELL_UP	KAECH_NAIVE_VS_MEMORY_CD8_TCELL_UP	197	0.294149	1.54794	0.000317435	0.00264314	0.0018457	3886	tags=25%, list=12%, signal=23%	GABRR2/RFLNB/EGR2/NDRG1/FCER2/POU2AF1/HLA-DOB/RALGPS2/BLK/GRK6/JARID2/UBE2R2/RETREG1/TCF4/DUSP6/CCR9/IGF1R/ACTN1/ZFAND5/MS4A1/ST13/DAG1/NRIP1/ST6GAL1/TLR6/NSG2/CD79B/TNFAIP8L1/MFHAS1/KLF7/MAP7/SPSB1/IL6R/SLC39A1/CCR7/NAB2/ZFR/MRM3/PAN2/ARL8B/CD1D/ENG/SQOR/CRY1/GPD2/CXXC5/DNTT/ZNF281/CANX/RPF1
GSE9650_NAIVE_VS_EFF_CD8_TCELL_UP	GSE9650_NAIVE_VS_EFF_CD8_TCELL_UP	GSE9650_NAIVE_VS_EFF_CD8_TCELL_UP	200	0.293511	1.54731	0.000240058	0.00205913	0.00143789	5283	tags=28%, list=16%, signal=24%	RBM38/RFLNB/RGCC/DTX1/HLA-DOB/RALGPS2/RETREG1/APP/TCF4/KCNN4/SPRED2/TSR1/DDX47/IFRD2/DUSP6/CCR9/CHERP/IGF1R/ACTN1/TCF7/HPCAL1/NECAP1/NOLC1/ST6GAL1/TLR6/NSG2/GRWD1/IPO4/SIPA1L2/MFHAS1/MAP7/SPSB1/SURF6/IL6R/CCR7/XPC/PAN2/APEX1/MAP4K3/SLC11A2/SLC44A1/CXXC5/ZNF281/FASN/NIT2/NOMO1/AMPD3/GSN/RPL7L1/IMP4/DDC/MDN1/IL7R/FAM102A/WFS1/USP10/SELL
GSE34392_ST2_KO_VS_WT_DAY8_LCMV_EFFECTOR_CD8_TCELL_DN	GSE34392_ST2_KO_VS_WT_DAY8_LCMV_EFFECTOR_CD8_TCELL_DN	GSE34392_ST2_KO_VS_WT_DAY8_LCMV_EFFECTOR_CD8_TCELL_DN	197	0.294025	1.54729	0.000396794	0.00321126	0.00224242	6564	tags=36%, list=20%, signal=29%	GEM/TMEM178A/EGR2/PHLDA1/LONRF1/PLK3/IL1B/PDGFB/NR4A3/CSF1/ATF3/SRXN1/SLC7A8/RASGEF1B/JAG1/PROCR/SLC22A5/PTPRE/EDN1/MCEMP1/HBEGF/CCRL2/ALAS1/RAB30/FEM1B/BCL2A1/TAGLN2/ADAM17/KLF7/ARHGAP31/VASP/PDGFA/TGM2/TTC39B/PCYT1A/NAB2/ANXA5/GDF15/FAM20C/PLXNA2/HVCN1/HERPUD1/SDC1/PIK3CB/TMEM26/GPD2/ZC3H12C/ZNFX1/NFKBIE/NR1H3/SLC2A6/IRAK3/MST1/VASN/MET/AGRN/CLEC6A/DYRK2/TRAF3/ARHGAP22/RAB20/SLC15A3/WDR1/DENND4…
GSE40274_CTRL_VS_HELIOS_TRANSDUCED_ACTIVATED_CD4_TCELL_DN	GSE40274_CTRL_VS_HELIOS_TRANSDUCED_ACTIVATED_CD4_TCELL_DN	GSE40274_CTRL_VS_HELIOS_TRANSDUCED_ACTIVATED_CD4_TCELL_DN	168	0.299392	1.54295	0.000762565	0.00540788	0.00377631	8984	tags=46%, list=27%, signal=34%	SLC25A25/HOMER1/EGR2/LONRF1/C1QTNF4/PLK3/ANKRD55/TXNRD1/ST6GALNAC4/SRXN1/LONRF2/MRPL44/PPRC1/AHCTF1/SNAI3/PICK1/ADO/ATP1A1/SEL1L2/MID2/IFNLR1/IPO4/PIP5K1C/CC2D1B/RPF2/PTPDC1/KCTD5/UTP4/POLR1C/AIMP2/DLK1/GPSM1/GOLGA5/IDE/VKORC1L1/CHST7/TOMM40/BCAR3/PSMD1/NETO2/PIP5KL1/CRLS1/ATL2/ELP1/QTRT2/NR1D2/CNGB1/TIMM50/ITPKB/COQ8A/SLC20A1/LIPT2/SLC3A2/NUBP1/POGK/PSMB5/PLAA/CCDC116/TBL3/CDC42EP5/RCC1L/XPO4/NT…
GSE41867_DAY6_EFFECTOR_VS_DAY30_EXHAUSTED_CD8_TCELL_LCMV_CLONE13_DN	GSE41867_DAY6_EFFECTOR_VS_DAY30_EXHAUSTED_CD8_TCELL_LCMV_CLONE13_DN	GSE41867_DAY6_EFFECTOR_VS_DAY30_EXHAUSTED_CD8_TCELL_LCMV_CLONE13_DN	199	0.292736	1.54206	0.000319361	0.00265064	0.00185094	8204	tags=41%, list=25%, signal=31%	TMEM259/DDX21/PUS3/ZBTB22/CCDC86/RYR1/LRRC8A/UTP25/JCAD/TRMT6/SPAG9/GCLC/GSPT1/IARS1/EIF4E/ZNF330/MAPK6/NSUN2/SLC16A1/ATP13A3/SIDT2/TRMT10C/SLC19A2/PRKAG2/NUS1/BCCIP/EML4/ZHX1/IBTK/USP16/ECHDC1/MEMO1/LETM1/NDUFAF4/SLAIN2/SLC44A1/GNAQ/CDV3/DHX33/CREG1/STRAP/PURB/MMGT1/VKORC1L1/ZBTB1/KDM7A/NAF1/PGRMC1/SLC4A1AP/RANBP6/SYNCRIP/BEND3/TIMM21/NOP14/LRWD1/CRYBG3/MTAP/TMEM177/SRRD/ZNF397/TXNDC5/TMEM184C/W…
GSE2770_IL4_ACT_VS_ACT_CD4_TCELL_2H_DN	GSE2770_IL4_ACT_VS_ACT_CD4_TCELL_2H_DN	GSE2770_IL4_ACT_VS_ACT_CD4_TCELL_2H_DN	197	0.292561	1.53958	0.000476153	0.00369955	0.00258339	5791	tags=31%, list=17%, signal=26%	LONRF1/FILIP1L/TOP1MT/NR4A3/AHCYL1/TSC22D2/ST6GALNAC6/DDX3X/ATF3/ITPKC/TRMT6/PLCL1/AHCTF1/SLC25A33/MORC2/NECAP1/SLC23A2/CD200/VSIG10L/IARS1/SLC16A1/RABEP1/ESF1/TTLL11/TREML2/PARP6/TTC39B/PPP1R15B/ZDHHC23/SLC38A2/SELENON/JAKMIP2/ITPRID2/C1orf189/EIF3D/CLIC4/CDV3/SLAMF7/LPP/NFE2L1/USP31/GOLGA5/MID1IP1/MGAT1/RAPGEF6/SEC63/RIOX1/FARSB/MAP2K4/NOL8/UBE2G2/KCNE1/BEND3/SELENOI/NOP14/LGALS3BP/MFSD2A/TRAF3…
GSE9988_LOW_LPS_VS_VEHICLE_TREATED_MONOCYTE_UP	GSE9988_LOW_LPS_VS_VEHICLE_TREATED_MONOCYTE_UP	GSE9988_LOW_LPS_VS_VEHICLE_TREATED_MONOCYTE_UP	189	0.293714	1.53862	0.00053607	0.00410557	0.00286691	4901	tags=28%, list=15%, signal=24%	GEM/ADM/CASP5/PLK3/IL1B/SAV1/DOT1L/KANK1/NSMAF/GPRC5A/MSANTD3/ADTRP/USP12/CXCL5/LAMP3/YRDC/EREG/RASGEF1B/RPGR/PIM3/OTUD1/EDN1/CD83/IL1A/TXN/PTGS2/CCRL2/STARD8/ABL2/TP53BP2/PDSS1/BCL2A1/LSS/UBE2J1/PPP1R15B/CCR7/FNIP2/ELOVL7/MGAM/STARD4/AQP9/SNX9/SLAMF7/INHBA/LAMB3/TNF/REL/CXCL8/LINC01465/NAF1/ANO5/CD274
GSE11961_MARGINAL_ZONE_BCELL_VS_MEMORY_BCELL_DAY40_UP	GSE11961_MARGINAL_ZONE_BCELL_VS_MEMORY_BCELL_DAY40_UP	GSE11961_MARGINAL_ZONE_BCELL_VS_MEMORY_BCELL_DAY40_UP	195	0.291035	1.5312	0.000470109	0.00367047	0.00256308	6764	tags=34%, list=20%, signal=28%	IFT140/VPS9D1/SLC66A1/OCSTAMP/ANKRD1/NXPH3/DBN1/NUAK2/MAN2C1/JARID2/MYBPC3/MFSD12/AVPI1/PLD4/PLCL1/TRIP6/CHST15/REEP3/ZNF23/ST6GAL1/CDS1/GABBR1/P2RX6/TAX1BP3/ABCA13/TSPAN17/LRCH1/OGFRL1/FNIP2/RTL5/CD1D/RASA4/ST3GAL5/SERPINB2/RARG/GOT2/LMO2/SLC29A3/SPI1/CCL22/CDC42BPB/WDFY4/ADCK1/CC2D2B/KIAA0232/RUFY3/TNFRSF21/STARD3/FAM214B/THRB/CMTM6/RAB11FIP1/SEL1L/C1orf198/RNF217/PLEKHM3/NCKIPSD/ARC/STIMATE/WN…
GSE39110_UNTREATED_VS_IL2_TREATED_CD8_TCELL_DAY6_POST_IMMUNIZATION_DN	GSE39110_UNTREATED_VS_IL2_TREATED_CD8_TCELL_DAY6_POST_IMMUNIZATION_DN	GSE39110_UNTREATED_VS_IL2_TREATED_CD8_TCELL_DAY6_POST_IMMUNIZATION_DN	196	0.290355	1.52792	0.000473111	0.003688	0.00257532	4330	tags=27%, list=13%, signal=23%	CXCR5/GABRR2/AFF3/PRICKLE1/RFLNB/EGR2/CASS4/AKAP12/BCL6/POU2AF1/GLIS3/HLA-DOB/CCDC141/SEMA7A/FCRL1/TPBG/MAP4K4/RETREG1/WNT10A/APP/SPRED2/PLCL1/IGF1R/ACTN1/GRHL1/TSPAN13/TWSG1/DDR1/TCF7/CD83/F2RL1/CD200/PFN2/ST6GAL1/MFHAS1/ARHGAP31/ARHGAP5/PHACTR2/MAP7/CERS6/TFCP2/MATK/DPY19L3/SHANK3/TIAM1/ZNF281/TMEM158/ZNF518B/GPRASP1/TSPAN3/ZNF24/BAG3
GSE46242_CTRL_VS_EGR2_DELETED_ANERGIC_TH1_CD4_TCELL_UP	GSE46242_CTRL_VS_EGR2_DELETED_ANERGIC_TH1_CD4_TCELL_UP	GSE46242_CTRL_VS_EGR2_DELETED_ANERGIC_TH1_CD4_TCELL_UP	189	0.291519	1.52712	0.000612651	0.00451564	0.00315326	6442	tags=30%, list=19%, signal=24%	STAT6/AQP3/FOLR3/NPR1/URGCP/TOP1MT/CHKA/LOXHD1/TSC22D1/MAF1/MGAT4B/ARRDC4/HPCAL1/ANGPTL4/DAG1/SSBP3-AS1/CHI3L2/PLIN2/CARD14/ADAM17/SIPA1L2/FAM228A/VASP/TTC39B/RARA/NLRC4/ANXA5/STARD7/GNAQ/TP53I3/FUNDC2/CD52/IQSEC1/SVIL/TGFB1/INF2/SEMA3G/REEP5/TMEM53/ALDOA/VCL/EHD4/KLHL3/IL7R/KCNE1/SCFD2/KCNK13/TMEM127/MORN2/NKRF/NKX2-5/CD151/CLCN5/RRS1/FCHO1/PHLDA3
GSE5589_LPS_VS_LPS_AND_IL10_STIM_IL6_KO_MACROPHAGE_180MIN_DN	GSE5589_LPS_VS_LPS_AND_IL10_STIM_IL6_KO_MACROPHAGE_180MIN_DN	GSE5589_LPS_VS_LPS_AND_IL10_STIM_IL6_KO_MACROPHAGE_180MIN_DN	198	0.289513	1.52485	0.000476872	0.00369955	0.00258339	7616	tags=37%, list=23%, signal=29%	HMGA1/SERTAD2/THEM4/RGCC/NKAIN1/TRMT61A/MOB3B/SLC7A11/HMG20B/ZSWIM1/SEMA4B/PCMT1/TRMT6/SLC7A1/CLDN12/ALAS1/CNST/FEM1C/SRC/ZNF330/DHX15/RABGEF1/NIPA2/IPO4/NSUN2/MMP19/PTPRS/NOP16/PCYT1A/EIF3B/SLC36A4/CCDC88A/ANKRD40/CSDE1/GLRX2/MCRIP2/PGAM5/DPY19L3/TMEM69/MYOF/MRTFB/AIMP2/PSMD2/MMGT1/BAIAP2/VWA8/CD274/MET/SCFD2/WDR12/RGS1/THRB/NOP14/TPP1/EIF2S1/ENO1/PHOSPHO1/SH3TC1/TMED5/FPGT/GTF2F2/METTL16/ARL15/…
GSE33425_CD161_INT_VS_NEG_CD8_TCELL_DN	GSE33425_CD161_INT_VS_NEG_CD8_TCELL_DN	GSE33425_CD161_INT_VS_NEG_CD8_TCELL_DN	198	0.289022	1.52226	0.000476872	0.00369955	0.00258339	8035	tags=40%, list=24%, signal=31%	CXCR5/ADM/CD19/FCRLA/CR2/POU2AF1/IGLC7/HLA-DOB/RALGPS2/PLCG2/ANXA1/BLK/SPIB/TCF4/PCSK5/C1orf43/PKIG/FICD/MS4A1/INPPL1/CD83/CD79B/PPID/RNFT1/TUBB6/QRSL1/PSMD14/VAMP4/SYPL1/PDE8A/ZNF385A/DNAJB9/TMED1/SLC44A1/ZC3H12C/MYADM/SPG21/LMO2/MTPN/MGAT1/SPINK4/EVI2A/FNDC3A/RHOQ/PLEKHB2/NDST1/TULP4/EEA1/PISD/LYL1/CYRIB/CD9/RPN1/RAB10/EPS8/CD40/PLAUR/SNX10/LYN/TFAM/NAPSA/TNPO1/GNG10/SYK/CLTC/HSD17B11/HSPA4/RAB…
GSE32986_UNSTIM_VS_GMCSF_STIM_DC_DN	GSE32986_UNSTIM_VS_GMCSF_STIM_DC_DN	GSE32986_UNSTIM_VS_GMCSF_STIM_DC_DN	195	0.28889	1.51992	0.00054846	0.00415568	0.0029019	5528	tags=30%, list=17%, signal=25%	ZCCHC2/DEPP1/CASS4/FILIP1L/DUSP14/TAF4B/ZPR1/DOT1L/DNAJB5/ACTN1/PROCR/GRHL1/SLC22A5/URB2/ABCC1/SIN3B/IL1RN/ASAP1/RANBP2/DHX15/CX3CL1/LSS/PPAN/MAP7/URB1/HSPA9/RXYLT1/CD209/PXDC1/EIF6/EML4/ODC1/MMP13/IGLON5/HVCN1/SERPINB2/UTP4/THSD7A/DNAJA2/AXL/NOMO1/CLN5/TGFB1/EIF5/HEMK1/S100A6/CSF2/MAPK1IP1L/VCL/FNDC3A/AGRN/WDR12/SERINC2/ATP2A2/CCDC38/RIOK2/ABITRAM/SPRYD7/AARD
GSE34156_UNTREATED_VS_6H_NOD2_LIGAND_TREATED_MONOCYTE_UP	GSE34156_UNTREATED_VS_6H_NOD2_LIGAND_TREATED_MONOCYTE_UP	GSE34156_UNTREATED_VS_6H_NOD2_LIGAND_TREATED_MONOCYTE_UP	160	0.296556	1.51836	0.00126709	0.00831975	0.00580966	8233	tags=44%, list=25%, signal=33%	TBKBP1/PKP2/TOP1MT/DUSP7/HMOX1/MRPL44/ZFYVE9/NDEL1/HPCAL1/ATP6V1G1/NAT9/HSF1/UBQLN4/PLIN2/SPON1/NEBL/RARA/CTDNEP1/NRBF2/MTX1/SAMD8/TMBIM1/FTH1/LIMK1/TOLLIP/VAPA/GSR/ARID3A/LAMTOR3/TAPT1/RHOD/NT5M/TOM1/MINDY1/UBTD1/RRBP1/TGFB1/UFSP1/SLC25A37/ZBTB3/PRAM1/HDHD5/LRRC8D/PTPMT1/LHFPL2/RAB20/CD9/PTGES2/TALDO1/GEMIN7/GUF1/ECM1/LYN/CEBPA/GRPEL1/NMNAT3/PARP16/BCL11A/RXRA/PSTK/PRDX6/DCAF1/NDUFA10/NDUFA7/PTG…
GSE3982_MAST_CELL_VS_TH2_UP	GSE3982_MAST_CELL_VS_TH2_UP	GSE3982_MAST_CELL_VS_TH2_UP	190	0.289606	1.51803	0.000616713	0.00453409	0.00316614	7167	tags=35%, list=21%, signal=27%	JUP/ADM/TIE1/FAT1/CLCN7/ANXA1/RCBTB2/SPRY2/BLK/CCDC68/NRP1/FAIM2/COL13A1/TMEM185B/ZFYVE9/CHST15/RTN2/IL1RN/FBXO38/ZNF804A/FLNB/SH3GLB1/SORBS1/SHBG/EMC3/DNAJB9/VPS53/GNAI1/LYZ/GSR/RREB1/CLIC4/ATP6V1H/EEF1AKMT3/SPI1/TSPAN3/FCGR2C/KIAA0232/CTNND1/VCL/RHEB/PAPSS1/FAM171A1/EPN2/LRRC8D/DAB2/MID1/TPP1/FBP1/PPCS/TMEM127/DOCK6/RIN1/FAM168B/ANKRD27/LMBRD1/CRLF2/SMPDL3A/ZNF135/LAPTM4A/GALNT1/LPGAT1/MIP/PLEK…
GSE6259_FLT3L_INDUCED_33D1_POS_DC_VS_BCELL_UP	GSE6259_FLT3L_INDUCED_33D1_POS_DC_VS_BCELL_UP	GSE6259_FLT3L_INDUCED_33D1_POS_DC_VS_BCELL_UP	195	0.28814	1.51597	0.00054846	0.00415568	0.0029019	8310	tags=39%, list=25%, signal=30%	EIF2B5/DDX31/DDX21/INSIG1/NAGPA/TRMT61A/PWP2/SLC25A32/TOP1MT/SLC44A2/MSANTD3/ST6GALNAC4/CHCHD4/PIM3/PES1/AKR7A2/ST13/CLUH/RRP9/MRPS30/EEF1AKNMT/GLS/NOP16/TRMT10C/RXYLT1/NRBF2/MRM3/USP16/HECTD1/STARD7/MRPS10/UTP4/NDUFA5/EIF5/MTG1/NSFL1C/TIMM23/TMEM150A/USP14/FARSB/NAF1/IMP4/CD53/CRLS1/BEND3/TIMM21/SELENOI/SCO1/PTPMT1/EXOSC5/NOP9/NUFIP1/PHB/FGD6/BEX1/YBX3/TMED5/RPP14/PSMB5/PRMT3/ARL1/OGFOD3/MPC1/NT…
GSE22886_IGA_VS_IGM_MEMORY_BCELL_DN	GSE22886_IGA_VS_IGM_MEMORY_BCELL_DN	GSE22886_IGA_VS_IGM_MEMORY_BCELL_DN	195	0.288015	1.51531	0.00054846	0.00415568	0.0029019	7584	tags=35%, list=23%, signal=27%	TCL1A/FCRL2/NFX1/PPARD/ABCB4/ARHGAP24/HES1/GGA1/PCDH9/TRIM9/TSC1/RRP1/TCF4/ZBTB18/HMOX1/UBXN6/ESRRA/BCL7A/CD79B/IGHD/GRWD1/OTUD4/MAGEF1/GTF3C2/CD1D/MGAM/SPATA20/PIEZO2/MAK16/SNX3/FCGR2C/TGFBRAP1/MRNIP/DICER1/CD1C/SORBS3/DCLK2/TULP4/DNASE1L3/BTG2/FGL2/BCL2L2/LPAR2/H2BC12/COQ8A/EPHA2/PLEK/ACBD4/YBX3/EIF5A/SYK/FZD5/METTL16/CD84/PRMT3/IL2/KMO/SLC7A7/CD72/SCAF11/EIF2B3/SNN/CELF1/UGCG/VNN1/PLOD1/TNS3/W…
GSE3982_EFF_MEMORY_VS_CENT_MEMORY_CD4_TCELL_DN	GSE3982_EFF_MEMORY_VS_CENT_MEMORY_CD4_TCELL_DN	GSE3982_EFF_MEMORY_VS_CENT_MEMORY_CD4_TCELL_DN	185	0.289969	1.5152	0.000901984	0.00618939	0.00432204	5858	tags=30%, list=18%, signal=25%	ICAM5/EIF2B5/AKR1C2/STK38L/POU6F1/LINC00667/SCML1/ZNF117/KLF9/DENND2D/APP/DAGLA/PLCL1/DPH2/C1S/RAP1GAP/NES/ABCC1/LDLRAP1/UGT8/ATP1A1/PFN2/UBIAD1/KLF7/DVL1/FABP1/PHACTR2/IL6R/CCR7/PEG10/CAND2/ECHDC1/CERS6/TRAK1/IGLL3P/CEP170/SEPTIN10/CASC3/SARAF/GSTM3/KLHL41/IMPACT/RUFY3/HDHD5/ZNF16/MUC2/MX2/SELL/FAM171A1/GSTM1/NUFIP1/C14orf132/BCAS4/SH3BGR/LPAR2
GSE2128_CTRL_VS_MIMETOPE_NEGATIVE_SELECTION_DP_THYMOCYTE_C57BL6_UP	GSE2128_CTRL_VS_MIMETOPE_NEGATIVE_SELECTION_DP_THYMOCYTE_C57BL6_UP	GSE2128_CTRL_VS_MIMETOPE_NEGATIVE_SELECTION_DP_THYMOCYTE_C57BL6_UP	180	0.291122	1.51449	0.000958631	0.00652298	0.00455498	5391	tags=33%, list=16%, signal=28%	CLDN14/HSPB7/ADM/ENPP2/CDKN1A/INSIG1/LINC00926/GGA1/MDH1B/SPRED2/SGCG/C22orf42/TEK/TRIM2/PIM3/LILRA2/PXN/SPATA31C2/NIBAN2/GCLC/SEL1L2/GLRX/PTH2R/PRPH/KLF8/PNKD/GABBR1/CDC42EP1/AC093583.1/TSPAN33/SLC43A3/ESAM/GDI1/LILRB1/NOTCH3/KCNC4/RNF24/GRHL3/CYBB/SNX9/MTHFD2L/SLAMF7/EPOP/CXorf58/INHBA/PKM/FCGR2C/TNF/HAS1/MYO1E/CD274/AGRN/ADGRE1/GCNT2/ITGB2/LILRA1/GPCPD1/ATP6V1B2/BTG2/LHFPL2
GSE21063_CTRL_VS_ANTI_IGM_STIM_BCELL_NFATC1_KO_8H_UP	GSE21063_CTRL_VS_ANTI_IGM_STIM_BCELL_NFATC1_KO_8H_UP	GSE21063_CTRL_VS_ANTI_IGM_STIM_BCELL_NFATC1_KO_8H_UP	189	0.289046	1.51416	0.000612651	0.00451564	0.00315326	8245	tags=41%, list=25%, signal=31%	RBM38/ITGA5/HOOK1/PLK3/MIDN/TCF7L2/BCL6/CLCF1/CHKA/TSC22D2/LONRF3/IBA57/PTPRE/MLXIP/IKZF5/FAM83G/TOPORS/TP53BP2/RAB30/MID2/RYK/CCNL2/RABGEF1/FGF9/ITPRIP/DNAJC3/NRIP3/DNMBP/DCTN6/TBC1D23/ASB6/LYZ/SLC11A2/ARFGEF2/BAMBI/PIK3CA/TGFB1/REL/SMURF1/FBXO21/KDM7A/GTF3C4/CCDC93/IL7R/FAM102A/ENC1/IER5L/NR1D2/ZNF276/CARNS1/ITPKB/RB1CC1/MAP3K2/FAM210B/IDI1/LYPD3/MMP9/BACH2/EPC1/TRIM39/SIRT1/ARHGEF7/ATP2B1/PDP1…
GSE5589_UNSTIM_VS_180MIN_LPS_STIM_MACROPHAGE_UP	GSE5589_UNSTIM_VS_180MIN_LPS_STIM_MACROPHAGE_UP	GSE5589_UNSTIM_VS_180MIN_LPS_STIM_MACROPHAGE_UP	198	0.287379	1.51361	0.00055635	0.0041894	0.00292544	5661	tags=27%, list=17%, signal=22%	RRP12/YPEL4/OLR1/MAN2C1/HMG20B/LIMS2/MFSD12/TSC1/UXS1/ZFYVE9/LDLRAP1/CPEB4/HBEGF/NAT9/C3orf33/PYROXD1/ZFAND6/CNIH1/DYNC1LI1/ITGAM/PTGR1/MMP19/PDGFA/SPATA6/ESF1/HYOU1/RNMT/ATP6AP1/VPS53/LIMK1/LETM1/PDLIM5/GATB/VPS45/MITF/PIK3CA/UBTD1/PLBD2/NAA35/CRIM1/VCL/TTC7B/CALU/CAVIN1/UBE2G2/WDR89/AGPAT3/NACC2/LARP4/FYTTD1/SEL1L/RAB10/RNLS
GSE24142_EARLY_THYMIC_PROGENITOR_VS_DN3_THYMOCYTE_UP	GSE24142_EARLY_THYMIC_PROGENITOR_VS_DN3_THYMOCYTE_UP	GSE24142_EARLY_THYMIC_PROGENITOR_VS_DN3_THYMOCYTE_UP	199	0.287072	1.51222	0.000558882	0.00419342	0.00292825	6218	tags=36%, list=19%, signal=30%	RFLNB/ABCB4/RAI14/TNFSF14/PRTN3/ANXA1/CA2/C1orf54/APP/DUSP6/TSC22D1/GCSAM/ITGAX/CLNK/PROCR/PTPRE/FLNA/MGAT4B/ABCC1/TLCD2/HBEGF/PTPN12/CCND1/DOCK5/MPO/TUBB6/TAGLN2/ANGEL1/PLXNB2/OGFRL1/CLEC4D/TMBIM1/NEK6/ACVR1B/AQP9/NR2F6/ST3GAL2/MYADM/CD44/CD34/SPI1/C11orf54/CD52/LRRK1/CSF1R/SIRPA/TYROBP/GSTM3/GSN/ARHGAP12/NRGN/S100A6/VCL/RHOQ/RGS1/GCNT2/HHEX/DOCK7/RAMP2/PTER/CD180/TMEM40/CD9/GATA2/CD33/TCEAL1/UA…
GSE18893_TCONV_VS_TREG_2H_TNF_STIM_DN	GSE18893_TCONV_VS_TREG_2H_TNF_STIM_DN	GSE18893_TCONV_VS_TREG_2H_TNF_STIM_DN	194	0.28754	1.51198	0.00062383	0.00455774	0.00318266	6990	tags=33%, list=21%, signal=26%	STAT6/CD27/TCF7L2/BCL6/SNX16/MIR22HG/TMCC3/SCML1/ZFYVE16/ZBTB18/RAB11FIP4/PTPRE/HLA-B/ZFAND5/MS4A1/ZNF701/PTPN12/BACH1/ZNF354A/RNFT1/TLR1/ZDHHC23/FBXO11/PRKAG2/BTBD7/SLC26A11/GOLGA7/OGFRL1/FNIP2/MGAM/DNMBP/SERINC1/TRAK1/ZNF333/AFF4/ATP9A/ZNF252P/KMT5B/PNPLA8/CBX7/FRY/CSRNP2/ZMAT1/APLP2/KDM7A/CASTOR3/EBLN2/ACVR2A/TRIM38/FAM43A/CPD/PLEKHM3/ZNF189/SDF4/ATAD2B/MAP3K2/ERBIN/PLEK/ZDHHC17/SNX29P2/TAPT1-…
GSE6674_UNSTIM_VS_ANTI_IGM_AND_CPG_STIM_BCELL_DN	GSE6674_UNSTIM_VS_ANTI_IGM_AND_CPG_STIM_BCELL_DN	GSE6674_UNSTIM_VS_ANTI_IGM_AND_CPG_STIM_BCELL_DN	197	0.287312	1.51196	0.000555511	0.0041894	0.00292544	7017	tags=39%, list=21%, signal=31%	ZCCHC2/PLK3/QSOX2/TGIF2/UTP15/TWNK/RRN3/GEMIN4/UTP25/WDR74/TSR1/CHCHD4/AHCTF1/PIM3/URB2/ELMO2/MORC2/SRSF6/UTP18/CNBP/PDCD11/RRP9/OTUD4/NAA25/MAFK/ARCN1/PIKFYVE/NSUN2/NIP7/USO1/POLR3D/PPAN/TRMT5/SYPL1/TRMT10C/URB1/HSPA9/DIMT1/ODC1/SPRED1/NDUFAF4/EEF1E1/UTP4/BRIX1/WDR43/MAK16/USP31/MAT2A/AKAP8/TNF/RIOX1/ATAD3A/DICER1/BYSL/POLR1A/LARP4/SRFBP1/LRP12/MFSD2A/MTAP/ENTR1/IPPK/PICALM/SLC20A1/WDR3/ZDHHC21/…
GSE22886_NAIVE_CD4_TCELL_VS_48H_ACT_TH2_UP	GSE22886_NAIVE_CD4_TCELL_VS_48H_ACT_TH2_UP	GSE22886_NAIVE_CD4_TCELL_VS_48H_ACT_TH2_UP	198	0.286648	1.50976	0.00055635	0.0041894	0.00292544	4388	tags=22%, list=13%, signal=19%	RBM38/HOOK1/VPS9D1/HIC2/TNS2/TBXA2R/TRMT61A/KAT8/THBD/ELANE/UFM1/MYO15B/RETREG1/LSR/KLF9/ZBTB18/UXS1/ACTN1/PXN/EDN1/VIPR1/RYK/PLEC/MPO/DVL1/MYOZ3/PARP6/ANKRD28/ZCCHC14/PDE8A/FAM83E/EIF3D/ZNF318/TRAM2/RREB1/BBOF1/AUXG01000058.1/CDC42BPB/ISLR/LILRB3/LARS1/SARAF/BAG3/SLC25A37
GSE19888_CTRL_VS_A3R_INHIBITOR_TREATED_MAST_CELL_DN	GSE19888_CTRL_VS_A3R_INHIBITOR_TREATED_MAST_CELL_DN	GSE19888_CTRL_VS_A3R_INHIBITOR_TREATED_MAST_CELL_DN	194	0.286622	1.50715	0.00062383	0.00455774	0.00318266	6060	tags=28%, list=18%, signal=23%	ADM/YPEL4/TCF7L2/BCL6/TSC22D2/ZFYVE16/ZBTB18/AVPI1/UBXN6/OTUD1/BACH1/ST6GAL1/ZNF354A/FTH1P5/RABEP1/ARAP1/USO1/ZCCHC14/CCR7/CALCOCO1/SRPRA/SLC26A11/OGFRL1/FTH1/FCRL3/MGAM/SERINC1/ZC3H12C/WASL/RAB11FIP2/NCF2/ZSWIM6/KMT5B/PNPLA8/UBE2E1/FRY/NAA50/CXCL8/APLP2/KDM7A/IL7R/RALA/PSMA3-AS1/LAPTM5/ZNF565/KYNU/TPD52L2/EPM2AIP1/NR1D2/NAMPT/PLAUR/PICALM/MARF1/RB1CC1/ERBIN
GSE33425_CD161_HIGH_VS_INT_CD8_TCELL_UP	GSE33425_CD161_HIGH_VS_INT_CD8_TCELL_UP	GSE33425_CD161_HIGH_VS_INT_CD8_TCELL_UP	197	0.28625	1.50637	0.000555511	0.0041894	0.00292544	8988	tags=45%, list=27%, signal=33%	CXCR5/ADM/CD19/FCRLA/POU2AF1/RYR1/IGLC7/HLA-DOB/RALGPS2/WBP2/ILF3/TRMT1/SPIB/TCF4/PLD4/PKIG/RPGR/FICD/NDEL1/MS4A1/INPPL1/DAG1/CD79B/PPID/TUBB6/RB1/MFHAS1/PSMD14/PDE8A/ZNF385A/DNAJB9/KIAA1522/ZC3H12C/MYADM/ABCF3/LMO2/SPI1/MTPN/CHUK/TMOD3/ADCK1/MGAT1/VCL/RHOQ/FEM1A/IQGAP1/HHEX/SELL/LYL1/BCL2L2/RAB10/CD40/SNX10/SND1/MEF2C/RNF13/LYN/NAPSA/GNG10/SYK/CLTC/CTSZ/HSD17B11/TSPAN32/RAB14/TBC1D14/TEC/ADAM9/S…
GSE17721_PAM3CSK4_VS_CPG_4H_BMDC_UP	GSE17721_PAM3CSK4_VS_CPG_4H_BMDC_UP	GSE17721_PAM3CSK4_VS_CPG_4H_BMDC_UP	198	0.285963	1.50615	0.000635829	0.00462352	0.00322859	7911	tags=38%, list=24%, signal=29%	PLEKHO1/NPEPL1/PWP2/CLN8/FANK1/DENND2D/SRXN1/ATP6V0C/MRPL44/SLC22A5/PIM3/NDEL1/OPN3/TMEM165/FERMT3/LSS/ADORA1/AMPD2/LASP1/YWHAQ/SLC19A2/JAM2/KLF10/DNAJC3/PEA15/ACVR1B/RCOR1/LAMTOR3/ACO1/MYADM/RANBP10/MAK16/CSF1R/COLGALT1/SIRPA/PTDSS2/PBDC1/MAT2A/SARAF/EIF5/FAM13B/ZBTB1/FAM120A/FKBP15/HDHD5/TMEM14C/FEM1A/ELP1/MATN1/PIP4K2C/DOCK7/RIOK3/CALR/ARF1/EFNB2/NCOR2/ZNF322/UBP1/VDAC1/FAM89B/TNPO3/FCHO1/CPEB…
GSE11864_CSF1_PAM3CYS_VS_CSF1_IFNG_PAM3CYS_IN_MAC_UP	GSE11864_CSF1_PAM3CYS_VS_CSF1_IFNG_PAM3CYS_IN_MAC_UP	GSE11864_CSF1_PAM3CYS_VS_CSF1_IFNG_PAM3CYS_IN_MAC_UP	189	0.287288	1.50496	0.000765814	0.00541588	0.00378189	5939	tags=33%, list=18%, signal=27%	QSOX2/RHBDF1/TATDN1/CRADD/SERPINE1/POTEKP/IMPA2/SLC5A6/MRTO4/IFRD2/SRSF12/VSTM2L/FLNA/JADE3/BCL7A/TRAP1/FPGS/UBQLN4/IARS1/ADGRA2/PUS1/SDC2/NOL6/ZNF528/PCID2/NOC2L/ZFR/BCCIP/NEK6/EIF3D/NCL/GALNT6/SLC44A1/RNF175/SERPINB2/LAS1L/DNAAF5/FCMR/RASAL2/PPFIBP1/SVIL/DSE/LARS1/FAIM/HCG4/SEC63/FLVCR2/HAS1/PPP2CB/FARSB/SLC1A2/IMP4/PGRMC1/MIEF1/ATL2/PTPRJ/BRMS1L/RAD23B/LRPPRC/EIF2S1/SCN9A/TNIP1
GSE23505_IL6_IL1_VS_IL6_IL1_IL23_TREATED_CD4_TCELL_DN	GSE23505_IL6_IL1_VS_IL6_IL1_IL23_TREATED_CD4_TCELL_DN	GSE23505_IL6_IL1_VS_IL6_IL1_IL23_TREATED_CD4_TCELL_DN	198	0.284953	1.50083	0.000635829	0.00462352	0.00322859	6996	tags=32%, list=21%, signal=25%	CXCR5/SLC25A25/VPREB3/PNPLA7/ADM/PLK3/POU2AF1/HLA-DOB/SLC44A2/DUS4L/RETREG1/JCAD/ZNF622/TRMT6/DNAJB5/TSC22D1/CAMKK1/AHCTF1/SLC7A1/MLXIP/MSANTD2/GCLC/BACH1/POLR3F/MAFK/TNFRSF12A/PIP4P1/SIDT2/ZBED5/ITPRIP/TAF1A/IL17RA/RBM47/CLIC4/DHX33/CCDC115/TOM1/MAT2A/SH3BP5/OSBPL8/TNFRSF21/ADIPOR2/CUL4A/RRH/MYO1E/CD274/BEND3/TULP4/M6PR/NR1D2/SLC39A6/SLC20A1/UBP1/NT5DC3/CDC16/EPC1/TMED5/CEBPZ/SLC35B3/CAMSAP1/BNI…
GSE5589_WT_VS_IL6_KO_LPS_STIM_MACROPHAGE_45MIN_DN	GSE5589_WT_VS_IL6_KO_LPS_STIM_MACROPHAGE_45MIN_DN	GSE5589_WT_VS_IL6_KO_LPS_STIM_MACROPHAGE_45MIN_DN	193	0.285318	1.49859	0.000623976	0.00455774	0.00318266	8063	tags=40%, list=24%, signal=31%	TMEM178A/CCL24/TBXA2R/RHBDF1/SAV1/NAGPA/DOT1L/RYR1/RNF41/RUSC2/LONRF3/ITGAX/TRIP6/TSPAN13/PTPRE/ZNF219/SLC12A5/ABCC1/LDLRAP1/FBXO38/LGALS2/CFAP54/ADAM15/CYP1B1/SDC2/MAFK/MBD2/PDGFA/GEMIN5/ANXA11/FAM118A/TMEM217/SRPRA/LIMK1/VARS1/GPAT2/RNF24/SPINT1/ST3GAL5/MYADM/NT5M/MCF2L/P3H3/FAM86B2/PPARG/MAP2K4/RNF128/TTC7B/WFS1/UROC1/SCO1/FGL2/TRAF3/HM13/PLAUR/STXBP1/USPL1/SOX9/MMP9/CNNM4/B3GALT6/CPNE2/TRAF5/…
GSE4748_CYANOBACTERIUM_LPSLIKE_VS_LPS_AND_CYANOBACTERIUM_LPSLIKE_STIM_DC_3H_DN	GSE4748_CYANOBACTERIUM_LPSLIKE_VS_LPS_AND_CYANOBACTERIUM_LPSLIKE_STIM_DC_3H_DN	GSE4748_CYANOBACTERIUM_LPSLIKE_VS_LPS_AND_CYANOBACTERIUM_LPSLIKE_STIM_DC_3H_DN	171	0.289231	1.49475	0.0015456	0.00988207	0.00690063	6382	tags=33%, list=19%, signal=27%	RBM38/GABRR2/YPEL4/CCDC197/VPS9D1/PLPPR2/PRTN3/ELANE/CEACAM6/SRXN1/CYSTM1/LINC00343/MAF1/CREB5/IGF2BP2/PICK1/IL1RN/SH3GLB1/BPI/FKBP1A/PGM5/OLFM4/VASP/FAM200B/PYGL/RNF24/TCN1/DEFA4/BBOF1/RANBP10/DGKH/SLPI/CREG1/INHBA/SNHG28/GJB6/LILRB3/MBNL1-AS1/HSD11B1/UBTD1/MAB21L3/DLGAP1-AS3/S100A11/MAG/CAVIN4/PDLIM7/LRRC4/SDR9C7/SULT1B1/LPL/SRRD/LTBR/WDR26/UBAP1/CLEC7A/STC1/MMP9
GSE16266_CTRL_VS_LPS_STIM_MEF_UP	GSE16266_CTRL_VS_LPS_STIM_MEF_UP	GSE16266_CTRL_VS_LPS_STIM_MEF_UP	196	0.28353	1.492	0.000867371	0.00599409	0.00418566	7611	tags=39%, list=23%, signal=30%	ITGA5/ARAP3/PLK3/OLR1/TMCC3/MAP11/DLC1/SERPINE1/KCNN4/TRIM36/SEMA4B/HMOX1/TSKU/RASGEF1B/SLC16A6/ANGPTL4/MEF2A/TMEM52B/RELT/VSIG10L/NRIP1/VDR/TNFAIP8L1/LIMS1/TNFRSF12A/MORC3/ICOSLG/TLR1/SH3BP2/KLF10/ENG/NEK6/PHC2/CEP170/HIVEP3/CHD9/CXXC5/ITPRIPL2/NFKBIE/GTF2IRD1/ZSWIM6/FAM120AOS/ZMIZ1/CRTC3/PMPCA/RFX2/KDM7A/RGS1/AGAP3/IER5L/LHFPL2/XPOT/NCOR2/VASH1/ITPKB/MAP3K2/GNA13/CEBPA/SH3TC1/CHST11/SLC25A19/UA…
GSE22611_UNSTIM_VS_6H_MDP_STIM_NOD2_TRANSDUCED_HEK293T_CELL_DN	GSE22611_UNSTIM_VS_6H_MDP_STIM_NOD2_TRANSDUCED_HEK293T_CELL_DN	GSE22611_UNSTIM_VS_6H_MDP_STIM_NOD2_TRANSDUCED_HEK293T_CELL_DN	194	0.283299	1.48968	0.000701809	0.00505054	0.00352678	6133	tags=31%, list=18%, signal=26%	MMP1/KAZALD1/SCG5/SPHK1/INSIG1/DHX34/TTLL4/ALB/RCBTB2/SLC7A11/KLF9/RRP1/SLC7A1/GCNT4/EDN1/CCRL2/SLC27A3/SRC/SQSTM1/NT5E/RAB1A/TRIO/ADAM17/ATP13A3/MRPS30/PYGL/SLC43A3/CMAS/LRRC17/IDH3B/IGLV1-44/OVGP1/VAC14/SLC11A2/NDUFAF4/SLAMF7/LMTK2/RAB11FIP2/CCR1/CD44/SLC29A3/SH3BP5/FCGR2C/ZNF721/EIF5/PDE4DIP/MRNIP/SZRD1/IFNAR1/ZCCHC4/TRMT13/GRIK4/CROCC/NFIX/TPP1/ITPR1/CD40/LAMP1/TIMP2/TMEM151B/CLCN5
GSE2405_HEAT_KILLED_LYSATE_VS_LIVE_A_PHAGOCYTOPHILUM_STIM_NEUTROPHIL_24H_UP	GSE2405_HEAT_KILLED_LYSATE_VS_LIVE_A_PHAGOCYTOPHILUM_STIM_NEUTROPHIL_24H_UP	GSE2405_HEAT_KILLED_LYSATE_VS_LIVE_A_PHAGOCYTOPHILUM_STIM_NEUTROPHIL_24H_UP	192	0.283688	1.48892	0.000777545	0.00547427	0.00382267	6466	tags=32%, list=19%, signal=26%	ARHGEF16/CSRP2/KCTD15/LONRF1/ARHGAP44/SCG5/IGKC/ANXA1/FSCN1/SLC6A8/TSC22D1/PLD4/TP53INP2/ABCC1/CD83/ALAS1/PFN2/RGS12/BCL2A1/PLIN2/ALCAM/GNB3/OGFRL1/CTNNA1/SPECC1/NEK6/HSD3B7/TMEM26/SLC44A1/WFIKKN2/WFDC2/RNF216/CCL22/AXL/LRRK1/CSF1R/MCF2L/TSPAN3/NCF2/LGALS3/PAPSS2/INF2/IFT43/GJA1/S100A6/ATP6V0B/VCL/EHD4/APLP2/SFRP1/CDH1/PLAGL1/FABP5/RNH1/LPCAT2/PLEK/SMAD1/CHST11/CLEC7A/MMP9/NAPSA/DOK1
GSE22432_MULTIPOTENT_VS_COMMON_DC_PROGENITOR_UNTREATED_DN	GSE22432_MULTIPOTENT_VS_COMMON_DC_PROGENITOR_UNTREATED_DN	GSE22432_MULTIPOTENT_VS_COMMON_DC_PROGENITOR_UNTREATED_DN	197	0.282925	1.48888	0.000714229	0.00511724	0.00357336	3780	tags=22%, list=11%, signal=20%	RBM19/CTU1/NFX1/EIF2B5/PWP2/UTP15/SMCR8/RRN3/UTP25/BTBD19/TSR1/MYBBP1A/MAP2K3/RASGEF1B/DPH2/JADE3/BOP1/BACH1/FPGS/RIOX2/NAA20/PPAT/EIF4E/ATP13A1/IL1R2/OTUD4/NIP7/REV1/NOP16/GEMIN5/CC2D1B/SLC19A2/JAGN1/RSL1D1/CTNNA1/TMBIM1/SEH1L/LETM1/MCRIP2/PGAM5/HIVEP3/CDV3/UTP11/DNAJA2
GSE36009_WT_VS_NLRP10_KO_DC_DN	GSE36009_WT_VS_NLRP10_KO_DC_DN	GSE36009_WT_VS_NLRP10_KO_DC_DN	198	0.282518	1.48801	0.000715308	0.00511744	0.0035735	7412	tags=39%, list=22%, signal=30%	FILIP1L/RHBDF1/ILF3/PEX5/ACVR1/TSC22D1/AVPI1/SRXN1/ZBTB21/ACSL3/PXN/ABCC1/LDLRAP1/ACSL5/NECAP1/SRSF6/BCL2A1/IRGQ/CD300LB/ADAM17/KLF7/SURF6/GTF3C2/EIF6/ARHGEF2/AP5B1/PAN2/SPECC1/TMBIM1/FAM20C/CPSF7/HERPUD1/MADD/SPRED1/TRIT1/GALNT6/SMG8/HIVEP3/SPI1/MKKS/LIG3/SOWAHC/SEPHS2/SEC23IP/PLEKHM2/CLN5/KPNA1/PCDH7/PMPCA/NAF1/IFNAR1/TRIM35/PDLIM7/SRFBP1/TRAF3/ZDHHC5/LHFPL2/RAB20/C5AR1/KCNK13/CD33/CPD/FASTKD1/…
GSE11057_NAIVE_CD4_VS_PBMC_CD4_TCELL_DN	GSE11057_NAIVE_CD4_VS_PBMC_CD4_TCELL_DN	GSE11057_NAIVE_CD4_VS_PBMC_CD4_TCELL_DN	197	0.28245	1.48638	0.000714229	0.00511724	0.00357336	7257	tags=42%, list=22%, signal=33%	CDKN1A/PLEKHO1/POU2AF1/MIR22HG/RHOC/TMCC3/PIP5K1B/SRXN1/RTN1/CFD/PTPN12/CARD9/PGD/SRC/TLR6/RALB/TKT/YWHAG/CYP1B1/TGFB1I1/LIMS1/FTH1P5/UBE2J1/ZNF385A/SLC31A2/FTH1/PEA15/ENG/HVCN1/DGAT2/HERPUD1/SLC6A6/TRAK1/GABARAP/GSR/SLC37A2/B3GNT5/VAMP3/ADAMTSL4/LILRB3/WDFY4/SH2B3/STXBP2/FUCA2/BCKDK/ARPC1B/UBE2E1/SH3BGRL3/REL/ACTB/MAP3K3/ATP6V0B/VCL/LINC00968/GSTO1/ZMPSTE24/ATP2A2/TMEM40/AP3B1/CD9/NAMPT/FABP5/GD…
GSE19401_UNSTIM_VS_PAM2CSK4_STIM_FOLLICULAR_DC_DN	GSE19401_UNSTIM_VS_PAM2CSK4_STIM_FOLLICULAR_DC_DN	GSE19401_UNSTIM_VS_PAM2CSK4_STIM_FOLLICULAR_DC_DN	200	0.281848	1.48583	0.000880211	0.0060647	0.00423496	6947	tags=38%, list=21%, signal=30%	TCL1A/NFX1/CASP5/TOB1/CCDC86/THBD/NSMAF/ANXA1/PROCR/FICD/NDEL1/GATAD1/COQ7/IL1RN/MEF2A/STARD8/NPC1/PDCD11/TOR1B/MAPK6/LSS/OTUD4/RB1/EEF1AKNMT/HTATIP2/TGM2/KLF10/TDP2/ADAMDEC1/DCTN6/LILRB4/ST3GAL5/VIM/GPD2/CDV3/ABRAXAS2/CREG1/ZBTB43/DLAT/ATP6V1E1/TARBP1/NR1H3/RARS1/LPAR1/RASGRP3/FKBP15/PDE4DIP/SPINK1/FNDC3A/XRCC4/MYO1E/CD164/SIK1/GRSF1/MX2/TMEM251/SLC30A1/LGALS3BP/CHMP2B/CCL7/BCL2L2/TCEAL1/SLC25A1…
GSE3920_IFNA_VS_IFNG_TREATED_FIBROBLAST_DN	GSE3920_IFNA_VS_IFNG_TREATED_FIBROBLAST_DN	GSE3920_IFNA_VS_IFNG_TREATED_FIBROBLAST_DN	186	0.284137	1.48525	0.00120864	0.0079682	0.00556418	4222	tags=27%, list=13%, signal=24%	LARGE1/RRP12/AQP3/SIAH3/ITGA7/RFLNB/NDRG1/FCRL1/UTP25/TRMT1/MYBBP1A/LRRC49/SEMA4B/SLC7A8/TUSC1/IGF1R/ACTN1/SNAI3/DDR1/RAPGEF4/PES1/TCF7/F2RL1/LHPP/CARD9/STARD8/NSG2/NT5E/PUS1/ZC3H12B/IPO4/SIPA1L2/MFHAS1/ARHGAP31/DLG4/CYP2S1/TREML2/IL6R/CCR7/SLC41A2/PLIN3/METTL8/ALDH3B1/COX10/DPY19L3/CRY1/ADAMTSL4/FASN/SH3BP5/MPP2/GTF2IRD1
GSE14769_UNSTIM_VS_80MIN_LPS_BMDM_DN	GSE14769_UNSTIM_VS_80MIN_LPS_BMDM_DN	GSE14769_UNSTIM_VS_80MIN_LPS_BMDM_DN	198	0.281677	1.48358	0.000874265	0.00603317	0.00421295	5714	tags=32%, list=17%, signal=27%	SLC25A25/EGR2/PHLDA1/IL1B/FILIP1L/DUSP14/PDGFB/TNFSF14/BCL6/SERPINE1/ATF3/ZNF622/VPS37C/RASGEF1B/PIM3/NDEL1/ZFAND5/IL1RN/HBEGF/CD83/CCRL2/HK2/FEM1C/ABL2/SQSTM1/BCL2A1/IRGQ/RABGEF1/KLF7/TGM2/CCN1/SLC38A2/WSB1/GDF15/TRIM13/MMP13/COQ10B/USP16/HERPUD1/SPRED1/SLAIN2/ZC3H12C/CCDC71L/SLAMF7/DNAJA2/ETF1/NFKBIE/KLF6/GFPT1/GJA1/REL/CLEC4E/RGS1/SRFBP1/JMJD1C/RAB12/BTG2/SPRYD7/RAB20/SLC15A3/NAMPT/FGD6/PLAUR
GSE17721_LPS_VS_GARDIQUIMOD_8H_BMDC_DN	GSE17721_LPS_VS_GARDIQUIMOD_8H_BMDC_DN	GSE17721_LPS_VS_GARDIQUIMOD_8H_BMDC_DN	196	0.281605	1.48187	0.000867371	0.00599409	0.00418566	5461	tags=29%, list=16%, signal=24%	CTU1/CARMIL1/DDX21/PKP2/PWP2/UBQLN1/TACSTD2/ZSWIM7/CCDC47/PNO1/EREG/ATP6V0C/SLC7A6/ACSL5/OPN3/CAV2/GLRX/DOCK5/CNIH1/YWHAG/APBB2/UBE2J1/TMEM63A/PSMD14/PTPRS/CCT2/PLIN3/BCCIP/DNASE1L1/ATP6AP1/DIMT1/ARL8B/FBXW11/ACVR1B/HERPUD1/HID1/MAK16/COLGALT1/MRPL3/LIG3/SEPHS2/ABR/NCF2/IPO5/KLHL20/TUFM/PPARG/PAICS/FKBP15/ATL2/GSTZ1/ZMPSTE24/HHEX/ATP2A2/LRWD1/CD9
GSE45365_NK_CELL_VS_BCELL_UP	GSE45365_NK_CELL_VS_BCELL_UP	GSE45365_NK_CELL_VS_BCELL_UP	197	0.281438	1.48105	0.000714229	0.00511724	0.00357336	6851	tags=34%, list=21%, signal=27%	GEM/PHLDA1/CASS4/SLC25A32/THBD/SELP/SERPINE1/ATF3/TSR1/DUSP6/SLC7A1/NDEL1/UTP20/CD83/BACH1/SLC23A2/ABL2/UTP18/FEM1B/MAPK6/NSUN2/VASP/PACRGL/CCN1/SH3BP2/PPP1R15B/HNRNPH1/MLX/RBM12/PAFAH1B2/TMEM128/ATP6V1H/ESYT2/RHOD/EDEM1/CDH11/MAT2A/PAK2/MID1IP1/AMPD3/HAS1/RIOX1/SIGMAR1/MDN1/CHSY1/ENC1/IFNAR1/ATP2A2/FGL2/ZDHHC5/SLC39A6/YWHAZ/NUFIP1/FAM43A/WDR1/PICALM/ARC/WDR3/EGR3/FOS/BCAT1/STX12/POLR3E/CAPN2/ATP…
GSE8921_UNSTIM_VS_TLR1_2_STIM_MONOCYTE_24H_UP	GSE8921_UNSTIM_VS_TLR1_2_STIM_MONOCYTE_24H_UP	GSE8921_UNSTIM_VS_TLR1_2_STIM_MONOCYTE_24H_UP	199	0.281092	1.48072	0.000718563	0.00512568	0.00357925	5020	tags=27%, list=15%, signal=23%	CXCR5/CD79A/IL1B/FCRLA/IGKC/FBRSL1/CR2/MYCL/TMCC3/RALGPS2/POU6F1/FCRL1/UBQLN1/TXLNG/AVPI1/CCR9/COL14A1/PROCR/NAT8L/EVI2B/CD28/CD83/MEF2A/C3orf33/RAB30/EBF1/DHX57/CAMK1/RASA3/CTNND2/TSPAN33/PARP6/SRSF5/CCR7/C1orf189/YTHDF2/AQP9/RAPGEF1/GNAQ/CREG1/SLC22A23/GTF2IRD1/UNC13B/FAM13B/DAPP1/RASGRP3/PPARG/STAB2/FUT4/CRIM1/AGRN/RABEP2/SPIRE1/RGS1
GSE22103_UNSTIM_VS_LPS_STIM_NEUTROPHIL_UP	GSE22103_UNSTIM_VS_LPS_STIM_NEUTROPHIL_UP	GSE22103_UNSTIM_VS_LPS_STIM_NEUTROPHIL_UP	199	0.280957	1.48001	0.000718563	0.00512568	0.00357925	7155	tags=35%, list=21%, signal=28%	CTU1/ITGA5/PHLDA1/PDGFB/TRMT61A/SMCR8/RHOC/ATF1/ITPKC/KCNN4/ST6GALNAC4/RASGEF1B/ZBTB21/SLC7A1/PIM3/KLF16/NIBAN2/NECAP1/RIOX2/KLHL26/BCL2A1/OSGIN1/TUBB6/OTUD4/AKAP1/ARCN1/MFHAS1/NIP7/ERCC1/RDH13/VASP/TRIB1/PIP5K1C/RARA/PPP1R15B/RBSN/ANXA5/TAF1A/MRPS18B/HIVEP3/ABHD2/SUSD6/PPP2CA/MFSD5/FAIM/NFIC/NR1H2/CRK/MAP2K4/IL7R/IFNAR1/BEND3/RGS1/TRAF3/NOL10/EIF1B/WDR1/CD40/GNA13/IPO7/CEBPA/INTS6/MAPKAPK3/LFNG/…
GSE25123_IL4_VS_IL4_AND_ROSIGLITAZONE_STIM_PPARG_KO_MACROPHAGE_DAY10_DN	GSE25123_IL4_VS_IL4_AND_ROSIGLITAZONE_STIM_PPARG_KO_MACROPHAGE_DAY10_DN	GSE25123_IL4_VS_IL4_AND_ROSIGLITAZONE_STIM_PPARG_KO_MACROPHAGE_DAY10_DN	191	0.281979	1.47926	0.00108275	0.0072761	0.00508088	4880	tags=27%, list=15%, signal=23%	RUBCNL/RFLNB/RGCC/PHLDA1/PLK3/IL1B/TNFRSF10D/OLR1/TIMP1/CLN8/SLC44A2/CA2/CXCL5/MAP2K3/NUMB/EREG/RUSC2/EVI2B/PTPRE/IL1RN/IL1A/PTGS2/FLNB/NT5E/CD109/MAFK/TRIM25/ADGRE2/PRR16/VASP/SHB/SLC43A3/MLX/GNB3/DGAT2/EMP1/LYZ/SLC11A2/GALNT6/SLC44A1/PRRG1/NCF2/PGAM1/OSBPL8/SLC25A37/TNFRSF21/TNF/CXCL8/EVI2A/CD53/CAVIN1/CSGALNACT2
GSE7831_UNSTIM_VS_INFLUENZA_STIM_PDC_4H_UP	GSE7831_UNSTIM_VS_INFLUENZA_STIM_PDC_4H_UP	GSE7831_UNSTIM_VS_INFLUENZA_STIM_PDC_4H_UP	193	0.28071	1.47438	0.00101396	0.00686114	0.00479112	5420	tags=31%, list=16%, signal=26%	DTX1/BMP1/ZBTB22/MSRB1/HLA-DOB/JARID2/CHKA/TXNRD1/SPRED2/ITGAX/SLC22A5/PTPRE/RTN1/EPHX2/ZFAND5/HK2/GFAP/FLNB/GLRX/CCND1/MAFK/CTNND2/VASP/TGM2/PCYT1A/PPP1R15B/LASP1/ANXA5/MAN1A1/DNASE1L1/CD300C/SH3D19/ADAMDEC1/RASA4/HSD3B7/ST3GAL5/GSR/MAPRE3/SQOR/SPI1/CD52/CSF1R/SOWAHC/CCNA1/NCF2/PAK2/LDB2/TNFRSF21/POLR1A/FAM102A/PLXNA1/CFHR2/GCNT2/CD63/RALA/KRT71/LYL1/BTG2/MDH2
GSE14350_IL2RB_KO_VS_WT_TREG_UP	GSE14350_IL2RB_KO_VS_WT_TREG_UP	GSE14350_IL2RB_KO_VS_WT_TREG_UP	193	0.280054	1.47094	0.00109196	0.00731777	0.00510998	5015	tags=26%, list=15%, signal=23%	RRP12/PNPLA7/KAZALD1/SCG5/PWP2/CCDC86/FCRL1/ALS2CL/DENND2D/BTBD19/SLC5A6/DPH6/SLC12A5/PDLIM4/BCL7A/MORC2/GLRX/GPATCH4/HSF1/PDCD11/CLUH/TRIO/OSGIN1/GRWD1/TGM2/RRP15/FHAD1/MRPS23/LAT/EMG1/ACVR1B/C1orf189/SNAI1/PACS2/WDFY1/GALNT6/SMG8/TAPT1/DHX33/MITF/HSD11B1/DSE/DRC1/BYSL/SLC4A1AP/MDN1/FAM102A/OGFOD1/ENC1/RHOBTB2/DNAJC11
GSE37301_COMMON_LYMPHOID_PROGENITOR_VS_GRAN_MONO_PROGENITOR_UP	GSE37301_COMMON_LYMPHOID_PROGENITOR_VS_GRAN_MONO_PROGENITOR_UP	GSE37301_COMMON_LYMPHOID_PROGENITOR_VS_GRAN_MONO_PROGENITOR_UP	193	0.279901	1.47013	0.00116996	0.00778692	0.00543758	6604	tags=32%, list=20%, signal=26%	CRYM/HOMER1/DDX21/TNFRSF10D/TNFSF14/SLC12A3/SLC25A32/KRTAP5-8/CSF1/MAP2K3/UXS1/PNO1/DPH2/IL17RC/NDEL1/ABCE1/CD83/PDCD11/OTUD4/NIP7/ESF1/EEF1AKNMT/KIF1B/DNAJB9/SDCBP/ARHGEF2/EIF3D/KIAA0513/WDR4/TICAM1/GPX3/CRY1/ABCF3/AIMP2/CHUK/KPNA1/LAMA2/EMC1/SGTA/TEX41/PMPCA/TOMM40/VCL/PSMD1/NETO2/OGFOD1/ENC1/RGS1/SERINC5/NEU3/KYNU/SETD6/PHB/ATG101/PLAAT1/COPS2/GSE1/GJC1/PKNOX2/POLR3E/LRRFIP1/TXNL1
GSE29618_PRE_VS_DAY7_POST_LAIV_FLU_VACCINE_PDC_UP	GSE29618_PRE_VS_DAY7_POST_LAIV_FLU_VACCINE_PDC_UP	GSE29618_PRE_VS_DAY7_POST_LAIV_FLU_VACCINE_PDC_UP	172	0.284178	1.46924	0.002195	0.0132516	0.00925356	2481	tags=17%, list=7%, signal=16%	VPREB3/COL6A3/HOOK1/PLS1/ARAP3/RAI14/ACVR2B-AS1/PRTN3/RALGPS2/SERPINE1/SLC9A3R2/SGCG/LARP6/NCLN/EREG/UBXN6/MPL/SHOX2/RAPGEF4/PDLIM4/WNT1/CAV2/ADAMTS8/HTN3/LEF1/OSGIN1/CDA/CDC42EP1/EDA2R/POLR3D
GSE6269_E_COLI_VS_STAPH_AUREUS_INF_PBMC_DN	GSE6269_E_COLI_VS_STAPH_AUREUS_INF_PBMC_DN	GSE6269_E_COLI_VS_STAPH_AUREUS_INF_PBMC_DN	175	0.283349	1.46813	0.00172948	0.0108165	0.00755311	7581	tags=40%, list=23%, signal=31%	IGHG1/ELOVL1/NAGPA/SIRT7/TKFC/FSCN1/TMCO3/EIF4G1/IMPA2/CYP4F3/EREG/ITGAX/JAG1/PTPRE/INPPL1/RAF1/SH3GLB1/IL1R2/GALNS/CYP1B1/ITGAM/ALCAM/PYGL/MGAM/PHC2/LYZ/SIRPA/ANPEP/NOMO1/LGALS3/RRBP1/BCKDK/TNFRSF10C/NR1H2/S100A6/ATP6V0B/APLP2/CALU/HSPA5/NDST1/IGF2R/PDLIM7/PISD/TPD52L2/ARF1/SLC15A3/CPD/MYDGF/LPAR2/CLN3/SDF4/LAMP1/PDXK/SH3TC1/MMP9/CYTH4/TGOLN2/ZNF668/IMPDH1/CLEC5A/APOBR/ADAM9/RGS2/FADS1/SIRPAP1/R…
GSE29618_MONOCYTE_VS_PDC_DAY7_FLU_VACCINE_UP	GSE29618_MONOCYTE_VS_PDC_DAY7_FLU_VACCINE_UP	GSE29618_MONOCYTE_VS_PDC_DAY7_FLU_VACCINE_UP	200	0.2783	1.46712	0.00120029	0.00792385	0.00553321	8160	tags=41%, list=24%, signal=31%	ARAP3/TCF7L2/TIMP1/BCL6/RCBTB2/VPS37C/PCSK5/HMOX1/QPCT/RTN1/PXN/IL1RN/HBEGF/ASAP1/LST1/FCN1/PTPN12/HK2/FGR/DOCK5/RALB/TKT/CYP1B1/ITGAM/TRIB1/SH3BP2/PYGL/SLC31A2/TMBIM1/CD1D/KIAA0513/ALDH3B1/SPG21/CREG1/SGK1/CD44/CSF1R/SIRPA/LILRB3/NCF2/BEST1/FCGR2C/FLVCR2/CXCL8/ALDOA/EVI2A/APLP2/CHSY1/MICAL2/ITGB2/TMEM164/NACC2/FGL2/RAB20/NAMPT/C5AR1/TMEM127/CD33/PICALM/CEBPA/CTSL/CLEC7A/TNFRSF1B/YBX3/DOK1/TUBA4A…
GSE29617_CTRL_VS_TIV_FLU_VACCINE_PBMC_2008_UP	GSE29617_CTRL_VS_TIV_FLU_VACCINE_PBMC_2008_UP	GSE29617_CTRL_VS_TIV_FLU_VACCINE_PBMC_2008_UP	182	0.281334	1.4666	0.00192535	0.0118289	0.0082601	5341	tags=29%, list=16%, signal=24%	PLK3/KLHL29/NR4A3/JARID2/PRSS33/TSC22D2/ATF3/LAMP3/GPC4/CYP4F3/RAD21-AS1/LONRF2/PLCL1/RASGEF1B/ZBTB21/FAM201A/PIM3/OTUD1/NDEL1/HBEGF/KLK10/NECAP1/FEM1C/RELT/SLC9A7/RAB1A/DHX15/RNF212B/MAFK/PI3/ITPRIP/DNAJB9/SAMD8/EML4/COQ10B/SERPINB2/CCDC71L/ZBTB46/ETF1/AKAP8/FOXD1/LDB2/PLBD2/REL/CXCL8/ZNF92/ARMC12/SIK1/RGS1/EBLN2/JMJD1C/BTG2
GSE17974_0H_VS_4H_IN_VITRO_ACT_CD4_TCELL_DN	GSE17974_0H_VS_4H_IN_VITRO_ACT_CD4_TCELL_DN	GSE17974_0H_VS_4H_IN_VITRO_ACT_CD4_TCELL_DN	198	0.278422	1.46643	0.00103322	0.0069721	0.0048686	6310	tags=29%, list=19%, signal=23%	GEM/FBLN7/EGR2/ZPR1/TNFSF14/POU2AF1/CCDC86/TTLL4/NR4A3/RRP1/BTBD19/BTLA/PNO1/STIP1/S1PR2/SPATA31C2/ACSL4/MRRF/CD200/GFOD1/NT5E/BCL2A1/RRP9/GRWD1/IPO4/POLR3D/PPAN/LINC01128/MLYCD/NAB2/STARD4/EPOP/PNP/UTP11/AIMP2/GON7/DSE/ATP6V1F/IDI2/SNX8/TNF/BYSL/IFNAR1/WDR12/TMEM251/CBR1/C3orf52/PPIL1/ZNF322/ZNF239/EGR3/NUBP1/DCTPP1/CTSL/BCAT1/RRS1/WDR77
GSE3982_BCELL_VS_TH1_UP	GSE3982_BCELL_VS_TH1_UP	GSE3982_BCELL_VS_TH1_UP	192	0.279383	1.46633	0.00132183	0.00864421	0.00603623	6475	tags=30%, list=19%, signal=24%	STAT6/TCL1A/RUBCNL/NPPC/FARP2/DACT1/RALGPS2/PNOC/CA2/SPIB/JADE3/PDLIM4/OPN3/ST13/CD83/PSD3/ZNF804A/CD200/MCF2L-AS1/S100A5/CHMP7/ADAM28/RABGEF1/SLC9A2/SIDT2/AMPD2/MZF1/IGLL3P/TCTA/DLK1/CD52/MKKS/HLA-DRB6/SNX3/MAT2A/FCGR2C/SLC35E1/ZNF202/FBXO21/CD1C/NCF1C/TULP4/DOP1B/NDST2/LYL1/FA2H/SLC15A3/ENTR1/DUS2/MEF2C/HUS1/DGKD/WDR77/SLC6A16/GSE1/IRS2/SYK
GSE4748_CTRL_VS_LPS_STIM_DC_3H_UP	GSE4748_CTRL_VS_LPS_STIM_DC_3H_UP	GSE4748_CTRL_VS_LPS_STIM_DC_3H_UP	196	0.278529	1.46568	0.000946223	0.00644755	0.00450231	5206	tags=28%, list=16%, signal=23%	TEAD3/EGR2/DPYSL3/AKAP12/SAV1/CXCL12/MMP10/SERPINE1/SPRED2/TRIM2/EREG/UNC5B/EDN1/MLXIP/HBEGF/ANGPTL4/PSD3/IARS1/FEM1B/CYP1B1/OTUD4/ZNF334/CCN1/PYGL/SLC38A2/UBQLN2/NAB2/CMAS/MAN1A1/RAP2A/MMP13/DKK3/HECTD1/CACNA1H/EMP1/RAPGEF1/SPRED1/KIAA0100/SLC16A3/INHBA/RND3/EDEM1/INTS5/CDH11/PIK3R4/AMPD3/SLC25A37/FNDC3A/DIP2B/RNF19A/ENC1/IQGAP1/MOB1B/FUS
GSE29164_UNTREATED_VS_CD8_TCELL_TREATED_MELANOMA_DAY3_DN	GSE29164_UNTREATED_VS_CD8_TCELL_TREATED_MELANOMA_DAY3_DN	GSE29164_UNTREATED_VS_CD8_TCELL_TREATED_MELANOMA_DAY3_DN	196	0.277628	1.46094	0.00110393	0.00737768	0.00515182	6986	tags=39%, list=21%, signal=31%	RBM38/INPP5F/IFT140/CASS4/FILIP1L/IGLC7/FCRL1/TSPAN9/SLC44A2/CHKA/ZBTB18/DNAJC22/RTN1/DDR1/MCEMP1/PTPN12/BACH1/RGS12/ITGB3/NRROS/CTNND2/CLPTM1/NAPG/SIDT2/IL6R/PYGL/SLC38A2/NRBF2/OGFRL1/FRMD5/MADD/RAPGEF1/CERS6/CADM3/SLC44A1/RARG/CHD9/RASAL2/CSF1R/RBM43/TYROBP/GSN/SLC25A37/DAPP1/PTPN6/S100A6/PDE4DIP/ZMAT1/CSGALNACT2/MYO1E/IL7R/SPIRE1/EVI5/JMJD1C/MDH2/NR1D2/SUPT4H1/SETD6/COQ8A/PANX1/RMND5B/DGKD/SMA…
GSE22432_MULTIPOTENT_VS_COMMON_DC_PROGENITOR_UNTREATED_UP	GSE22432_MULTIPOTENT_VS_COMMON_DC_PROGENITOR_UNTREATED_UP	GSE22432_MULTIPOTENT_VS_COMMON_DC_PROGENITOR_UNTREATED_UP	200	0.27703	1.46043	0.00144035	0.00930685	0.00649895	7083	tags=35%, list=21%, signal=28%	EGR2/LONRF1/ZPR1/BABAM2/UTP15/SMYD5/AHCYL1/WDR73/ILF3/TSR1/PCMT1/CHML/CHCHD4/SLC25A33/JADE3/NAA20/AAMP/IARS1/EIF4E/FEM1B/PDSS1/TUBB6/NARS2/NIP7/POLE4/NOP16/GEMIN5/TRMT10C/JAGN1/LRRC59/ODC1/HMBS/NDUFAF4/SERPINB2/UTP11/NARS1/ETF1/LIG3/MMGT1/PGAM1/GNPNAT1/NAA15/SIGMAR1/ZBTB1/NAF1/IMP4/C12orf66/ZMPSTE24/TPD52L2/EXOSC5/MDH2/DDX1/CUL2/PHB/SURF2/BAG1/WDR3/C1QBP/RRS1/CISD2/GTF2F2/AP1AR/ACOT7/NDUFS5/RPP40…
GSE13522_CTRL_VS_T_CRUZI_Y_STRAIN_INF_SKIN_BALBC_MOUSE_DN	GSE13522_CTRL_VS_T_CRUZI_Y_STRAIN_INF_SKIN_BALBC_MOUSE_DN	GSE13522_CTRL_VS_T_CRUZI_Y_STRAIN_INF_SKIN_BALBC_MOUSE_DN	122	0.296533	1.45774	0.00744568	0.0359765	0.0251223	7489	tags=39%, list=22%, signal=31%	ITGA5/ANKRD1/CLCF1/TBC1D4/HDAC9/TNKS1BP1/TCF4/IGF1R/ACTN1/CHST15/TCF7/LEF1/ST6GAL1/NSG2/TRIO/MFHAS1/EPHB6/IL6R/CCR7/CALCOCO1/CCDC88A/CLEC4D/ZNF318/CERS6/SQOR/RREB1/SLC44A1/GPSM1/CC2D2B/CRIM1/PABPC4L/PLXDC2/FAM83B/STON1/CBARP/SELL/CD9/THUMPD2/POU4F3/BACH2/TTYH3/IL2/KRT2/SOX4/PLAG1/RGS2/UGCG/RERE
GSE40274_XBP1_VS_FOXP3_AND_XBP1_TRANSDUCED_ACTIVATED_CD4_TCELL_DN	GSE40274_XBP1_VS_FOXP3_AND_XBP1_TRANSDUCED_ACTIVATED_CD4_TCELL_DN	GSE40274_XBP1_VS_FOXP3_AND_XBP1_TRANSDUCED_ACTIVATED_CD4_TCELL_DN	197	0.276627	1.45573	0.00111102	0.00740479	0.00517075	5002	tags=25%, list=15%, signal=21%	RRP12/NIBAN3/FIBCD1/TGIF2/PWP2/TMCC3/NR4A3/PEX5/TRMT1/EHD3/TSC22D1/CCR9/ACTN1/SLC16A6/SLC7A1/URB2/SLC7A6/TCF7/INPPL1/EMILIN1/GSPT1/GPATCH4/RGS12/UBQLN4/CLUH/AKAP1/SPATA6/CCR7/ZNF629/ZBED5/CCDC88A/MTX1/ODC1/SEH1L/METTL1/WDR4/TTLL12/NDUFAF4/TNFRSF19/GPSM1/CCT6A/DDX19A/GSN/TYW3/NRGN/BYSL/TTC7B/NETO2/WDR12
GSE9509_10MIN_VS_30MIN_LPS_STIM_IL10_KO_MACROPHAGE_DN	GSE9509_10MIN_VS_30MIN_LPS_STIM_IL10_KO_MACROPHAGE_DN	GSE9509_10MIN_VS_30MIN_LPS_STIM_IL10_KO_MACROPHAGE_DN	185	0.278556	1.45557	0.0019543	0.0119916	0.00837372	3945	tags=25%, list=12%, signal=22%	VPREB3/ITGA5/IGHV5-78/CD27/CD19/DTX1/AKAP12/DBN1/POU2AF1/SLC44A2/PAX5/NCLN/NRN1/SPPL2B/DBH-AS1/DDR1/LCN8/FADS3/MLXIP/ACSL4/LHPP/BANK1/PSD3/NRIP1/LEF1/GFOD1/CD79B/CYGB/QRSL1/PI3/MTG2/SPSB1/LEF1-AS1/PITPNM2/RIMS3/GRHL3/INO80C/NAV1/TAPT1/SHANK3/IGKV4-1/FCMR/FHIT/EDEM1/PPFIBP1/IQSEC1
GSE45365_WT_VS_IFNAR_KO_CD8A_DC_MCMV_INFECTION_UP	GSE45365_WT_VS_IFNAR_KO_CD8A_DC_MCMV_INFECTION_UP	GSE45365_WT_VS_IFNAR_KO_CD8A_DC_MCMV_INFECTION_UP	197	0.276463	1.45487	0.00119038	0.00787335	0.00549794	7553	tags=35%, list=23%, signal=27%	CASS4/FILIP1L/FSCN1/WBP2/EIF4G1/C1orf54/TCF4/TMX2/QPCT/RTN1/RAF1/ASAP1/GORASP1/TLN1/FKBP1A/OTUD4/HIGD1A/MAP7D1/BICD2/LYRM2/AMPD2/PLXNB2/SRSF5/LASP1/WSB1/PLIN3/GPX3/PTBP1/CHD9/MYO9B/LRP10/PARP12/FASN/CLEC4A/PKM/GATAD2A/LAMB3/CLN5/IDE/EIF5/PKD1P6/CRTC3/CRK/VCL/VWA8/PLXNA1/LIN7C/NACC2/ATP2A2/COMMD10/CRYBG3/DENND4B/TAX1BP1/COQ8A/SLC20A1/MLEC/POLR2J4/SH3TC1/TNPO3/XIST/TFEC/TBC1D2B/CLEC5A/TBC1D5/MMP7/Z…
GSE369_PRE_VS_POST_IL6_INJECTION_SOCS3_KO_LIVER_UP	GSE369_PRE_VS_POST_IL6_INJECTION_SOCS3_KO_LIVER_UP	GSE369_PRE_VS_POST_IL6_INJECTION_SOCS3_KO_LIVER_UP	197	0.276448	1.45479	0.00119038	0.00787335	0.00549794	5483	tags=28%, list=16%, signal=24%	SERTAD2/GEM/E2F5/CDKN1A/MIR22HG/RRN3/CRADD/RPL9/PTPRE/RAF1/TXN/CCRL2/HK2/ADO/BACH1/STARD8/FEM1C/NPC1/ABL2/RALB/MID2/IARS1/RAB1A/BCL2A1/PLIN2/APOH/CDS1/ADGRG2/UBE2J1/RBM3/ANKRD28/YWHAQ/HNRNPH1/KLF10/SLC31A2/AQP9/EMP1/PAFAH1B2/ZBTB43/CD44/KLF6/PGAM1/EIF5/EMC1/RUFY3/PPARG/CD1C/CD53/RHEB/KLHL21/CFHR2/CD63/PAPSS1/CHMP2B/RIOK3/FBP1
GSE42021_CD24HI_VS_CD24INT_TCONV_THYMUS_UP	GSE42021_CD24HI_VS_CD24INT_TCONV_THYMUS_UP	GSE42021_CD24HI_VS_CD24INT_TCONV_THYMUS_UP	194	0.276618	1.45455	0.00155958	0.00995839	0.00695392	5456	tags=28%, list=16%, signal=24%	CXCR5/TLE1/HOOK1/RHOF/TOB1/RHBDF1/NDRG1/DLC1/JARID2/HMG20B/HMOX1/TSC22D1/RAP1GAP/SHOX2/ZFAND5/HBEGF/DNAJB12/MRAS/RYK/PROC/DYNC1LI1/APOO/ALCAM/ANKRD28/ZCCHC14/SYPL1/ZBED5/TP53AIP1/ARHGEF2/ODC1/SMOX/MRC1/KIAA0513/GNAI1/VAMP3/GOT2/SGK1/SLC29A3/IQSEC1/ABR/NFKBIE/ATP9A/AKIRIN1/ZMIZ1/EVC/PPARG/ZBTB1/ZFX/CSNK2A1/STARD3/IGSF3/C6orf120/NACC2/LRRC8D/NRAP
GSE360_L_DONOVANI_VS_B_MALAYI_HIGH_DOSE_MAC_UP	GSE360_L_DONOVANI_VS_B_MALAYI_HIGH_DOSE_MAC_UP	GSE360_L_DONOVANI_VS_B_MALAYI_HIGH_DOSE_MAC_UP	195	0.276346	1.45392	0.00148868	0.00957791	0.00668823	4671	tags=27%, list=14%, signal=23%	DCHS1/ADM/CASP5/RAI14/MSC/TIMP1/MIR22HG/SPRY2/GREM1/SLC6A8/ATP1B2/SERPINE1/MT1H/MT1G/TSC22D2/USP12/LAMP3/HMOX1/IL1RN/HBEGF/HK2/ADO/MT1A/NRIP1/VDR/HNRNPH2/BCL2A1/PLIN2/CYP1B1/OTUD4/CLPTM1/TGM2/HYOU1/CCR7/ALDH1B1/MRC1/AQP9/CCR1/LILRA4/ANKRD46/FUT6/ANPEP/SH3BP5/VCAN/PAX6/RARS1/OSBPL8/CXCL8/BTBD3/PDIA4/CD1C/CAPN7
GSE11057_NAIVE_VS_MEMORY_CD4_TCELL_UP	GSE11057_NAIVE_VS_MEMORY_CD4_TCELL_UP	GSE11057_NAIVE_VS_MEMORY_CD4_TCELL_UP	192	0.276079	1.44899	0.00163284	0.0103719	0.00724264	5299	tags=27%, list=16%, signal=23%	SERTAD2/MIR600HG/EFNA1/TAF4B/SCML1/RNF157-AS1/RETREG1/ZBTB18/PCSK5/CHML/SPPL2B/IGF1R/PKIG/EDAR/DDR1/REG4/MLXIP/DSC1/MEF2A/CHMP7/CHI3L2/KLF3-AS1/PADI4/TMEM41B/LEF1-AS1/PITPNM2/MZF1/TMEM198B/SNX9/GNAI1/SLC11A2/RNF175/LMLN/KRT73/DNTT/GPRASP1/TLE2/PJVK/TSPAN3/TARBP1/MAML2/RNF227/SLC29A2/RAPGEF6/SLC25A37/GPRASP2/BTBD3/AGRN/ZNF229/KRT72/EEA1/SLC25A25-AS1
GSE369_SOCS3_KO_VS_WT_LIVER_UP	GSE369_SOCS3_KO_VS_WT_LIVER_UP	GSE369_SOCS3_KO_VS_WT_LIVER_UP	194	0.275428	1.44829	0.00163755	0.0103747	0.00724465	6570	tags=31%, list=20%, signal=25%	RRP12/DDX31/PWP2/LGI2/KBTBD8/PUS3/CCDC86/TTLL4/ST6GALNAC4/TSEN2/STIP1/SLC7A1/SLC7A6/TFB2M/UTP18/ATP13A1/RNFT1/NARS2/AKAP1/PSMD14/ZDHHC23/RXYLT1/SRPRA/FASTKD2/VDAC2/EIF6/TMBIM1/APEX1/HMBS/TMED1/G6PD/KCTD5/EEF1E1/DHX33/ACACA/ETF1/SPART/PBDC1/EIF4A1/GNPNAT1/TIMM23/USP14/NAA50/MRM1/MAPK1IP1L/DRC1/NAF1/GSTO1/HSPB2/FYTTD1/XPOT/DDX1/C1orf198/IDI1/C1QBP/BCAT1/RRS1/PNPO/POLDIP2/TMED5/GRPEL1
GSE20715_0H_VS_24H_OZONE_TLR4_KO_LUNG_DN	GSE20715_0H_VS_24H_OZONE_TLR4_KO_LUNG_DN	GSE20715_0H_VS_24H_OZONE_TLR4_KO_LUNG_DN	194	0.275407	1.44818	0.00163755	0.0103747	0.00724465	7172	tags=37%, list=21%, signal=29%	CFB/ADM/LTBP2/CDKN1A/TIMP1/TMCC3/SEMA7A/MYBPC3/DUSP6/ACTN1/PPRC1/SLC7A6/EDN1/MLXIP/ATP6V1G1/ANGPTL4/GSPT1/SLC23A2/PGD/EIF4E/PLIN2/TUBB6/KCMF1/SPSB1/LRRC59/IDH3A/EIF6/ITPRID2/GPX2/VAPA/LOX/CCDC71L/POLR1C/DNAAF5/CCL22/GJB6/FASN/ETF1/HSD11B1/LGALS3/LPAR1/KPNA1/CDK18/LAMA2/PDE4DIP/LYVE1/ITGB1BP1/UBE2G2/HSPA5/CTTNBP2NL/RAMP2/KCNE2/RIOK2/IL1RAP/LPL/FER/STAU1/LEPR/SLC3A2/EPHA2/MYD88/CAPN2/SLC30A7/MYOM2/…
GSE4984_GALECTIN1_VS_LPS_STIM_DC_DN	GSE4984_GALECTIN1_VS_LPS_STIM_DC_DN	GSE4984_GALECTIN1_VS_LPS_STIM_DC_DN	158	0.283203	1.44774	0.00481054	0.0252826	0.0176548	7934	tags=41%, list=24%, signal=32%	CRHR2/GEM/PLK3/LRRC8B/CLGN/SELP/RRN3/TRMT2A/UTP25/TSC22D1/PITX2/PTPRE/KIRREL3/SLC7A14/MRRF/MT1A/DOCK5/HSF1/AKAP1/DPEP1/ADAM17/STON2/KLF7/PPAN/TTC39B/JAGN1/IBTK/EMP1/ST3GAL5/PTBP1/PRDM4/PSMD2/LPP/LILRB3/RARS1/NANS/IPO5/NAA50/TTC9/ATP11A/LARP4/TALDO1/CUL2/PTGES3/PDXK/SLC20A1/KLK6/RTN3/ADRA2B/POGK/GTF2F2/TASP1/TXNL1/CHN1/MYOM2/HSPA4/WDR36/TIMM17A/ISG20L2/TAFA3/PSMC2/GALE/SDHB/PSMB6/HSP90AB1
GSE12707_AT16L1_HYPOMORPH_VS_WT_THYMUS_DN	GSE12707_AT16L1_HYPOMORPH_VS_WT_THYMUS_DN	GSE12707_AT16L1_HYPOMORPH_VS_WT_THYMUS_DN	115	0.297976	1.44755	0.0086919	0.0404517	0.0282473	5217	tags=30%, list=16%, signal=26%	SERTAD2/RHBG/NPW/DBH/BEGAIN/UBQLN1/NIPAL4/DPEP3/ATP6V0C/TSPAN1/DDR1/ROM1/CACNA1F/ZGLP1/PROC/TMEM45B/TMEM125/NOL6/PLCD1/GEMIN5/SETD1A/TRAM2/LMLN/ITPRIPL2/NR1H3/CDHR5/SLC45A2/DSE/SLC35E1/CTNND1/TTC9/NAF1/FAHD1/GRSF1/GRIK4
GSE39556_UNTREATED_VS_3H_POLYIC_INJ_MOUSE_NK_CELL_DN	GSE39556_UNTREATED_VS_3H_POLYIC_INJ_MOUSE_NK_CELL_DN	GSE39556_UNTREATED_VS_3H_POLYIC_INJ_MOUSE_NK_CELL_DN	198	0.274715	1.44691	0.00135114	0.00881223	0.00615356	5224	tags=28%, list=16%, signal=24%	TLE1/ITGA5/DEPP1/CD27/MYRF/AKAP12/NDRG1/KCNS3/SYNGR1/TSPAN9/RETREG1/ZFYVE16/ACVR1/ACTN1/CHST15/LILRA2/PTPRE/MLXIP/KHNYN/LST1/PTPN12/PSD3/MDK/NRIP1/PFN2/STX4/TKT/KLF7/GLS/PLXNB2/SRSF5/WSB1/RIMS3/KLF10/MAN1A1/ENG/LILRB2/GNAQ/LMO2/CD34/FHIT/EDEM1/MAPK8IP3/ST3GAL6/ZMIZ1/SEC63/HLX/SPINK1/CRIM1/STARD3/RANBP6/FAM214B/WFS1/PDLIM7/TSPAN7
GSE339_EX_VIVO_VS_IN_CULTURE_CD4POS_DC_DN	GSE339_EX_VIVO_VS_IN_CULTURE_CD4POS_DC_DN	GSE339_EX_VIVO_VS_IN_CULTURE_CD4POS_DC_DN	194	0.275053	1.44631	0.00171553	0.0107569	0.00751149	8352	tags=39%, list=25%, signal=29%	ENPP2/RGCC/CDKN1A/NOS2/BLK/SEMA7A/SLC7A11/MAP4K4/BMX/CLDN7/PCSK5/SRXN1/SCIN/IL1RN/CD83/GSPT1/BCL2A1/TOR1AIP2/ADAM15/TUBB6/ADAM17/KCMF1/ANKRD28/WSB1/ANXA11/HSPA9/LRRC59/CD276/FTH1/SNX9/GPD2/TWIST2/DNAJA2/RAB7A/USP9X/USP14/HAS1/RPL7L1/LMNA/RALA/GPCPD1/EEA1/M6PR/NRAP/NAMPT/FABP5/NUFIP1/RAB10/CCNC/NEK4/RAD23B/SLC51A/PTGES3/UBE2Z/WDR26/YBX3/PHLDA3/HSD17B11/C6orf62/LATS2/THAP12/KTN1/UBE2D3/GOLGA4/CHD7/…
GSE13485_CTRL_VS_DAY21_YF17D_VACCINE_PBMC_UP	GSE13485_CTRL_VS_DAY21_YF17D_VACCINE_PBMC_UP	GSE13485_CTRL_VS_DAY21_YF17D_VACCINE_PBMC_UP	188	0.276274	1.44589	0.00190723	0.0117472	0.00820304	8887	tags=40%, list=27%, signal=29%	SERTAD2/NPEPL1/MIDN/FASTKD5/WBP2/NEK3/ZNF746/DDX19B/ITGAX/IBA57/PXN/HBEGF/CD83/ADO/NECAP1/POLR3F/SQSTM1/MAP7D1/NAPG/ABCA13/ZNF787/RBSN/SLC36A4/DNAJC3/ACVR1B/UBAP2L/PITPNA/MADD/PAFAH1B2/WASL/SUSD6/EDEM1/LPP/VPS18/PURB/SH2B3/AKAP8/CRK/CUX1/CALU/ABHD13/SIK1/STON1/ATP2A2/EBLN2/SLC30A1/RAD23B/NCOR2/MAP3K2/ATG14/TNFRSF1B/GRPEL1/MAP6D1/RELA/TRIM8/ATG9A/GRB2/ZBTB34/ZDHHC3/SNN/UBAC1/IRAK1/CFL2/AKT1S1/UHRF…
GSE22140_HEALTHY_VS_ARTHRITIC_GERMFREE_MOUSE_CD4_TCELL_DN	GSE22140_HEALTHY_VS_ARTHRITIC_GERMFREE_MOUSE_CD4_TCELL_DN	GSE22140_HEALTHY_VS_ARTHRITIC_GERMFREE_MOUSE_CD4_TCELL_DN	200	0.274237	1.4457	0.00144035	0.00930685	0.00649895	6873	tags=36%, list=21%, signal=29%	HMGA1/SERTAD2/GEM/CDKN1A/IL1B/PDGFB/INSIG1/TNFSF14/MSC/TIMP1/KANK1/MIR22HG/SLC7A11/SERPINE1/MAP4K4/TXNRD1/MAP2K3/HMOX1/SLC7A8/NPC1/ABL2/TP53BP2/STX4/TRIM25/VASP/TRIB1/FCGBP/MAN1A1/VSIG4/MRC1/DNMBP/EMP1/SERPINB2/BCAP31/PNP/CCR1/SH3BP5/KLF6/SGTA/HSP90B1/TNF/HLX/SMURF1/CPQ/APLP2/IL7R/ELOC/RGS1/LMNA/FUS/BTG2/TPD52L2/CCL7/RPN1/YWHAZ/NCOR2/CLEC11A/CLN3/TIMP2/ZNF134/SLC3A2/CTSL/PRPF4/BCAT1/TNFRSF1B/UAP1…
GSE3982_MAST_CELL_VS_EFF_MEMORY_CD4_TCELL_UP	GSE3982_MAST_CELL_VS_EFF_MEMORY_CD4_TCELL_UP	GSE3982_MAST_CELL_VS_EFF_MEMORY_CD4_TCELL_UP	197	0.274521	1.44465	0.00158718	0.0101164	0.00706429	8606	tags=42%, list=26%, signal=31%	ADM/ENPP2/FAT1/MSRB1/NRP1/CHKA/SCML1/TXNRD1/NQO2/TMX2/SLC24A3/COBLL1/RTN2/ST13/ALAS1/GSPT1/FLNB/HNRNPH2/TKT/SORBS1/OSGIN1/BHLHE41/HIGD1A/HYOU1/CBS/HSPA9/PDE8A/GLRX2/DCTN6/AVL9/TRAK1/MITF/OPA1/RAB7A/SH2B3/FCGR2C/IMPACT/KLHL2/PDIA4/CSRNP2/KIAA0753/TMEM164/PISD/ESYT1/ITGBL1/LRP12/DAB2/SLC15A3/SEL1L/FBP1/LTBR/PICALM/PINLYP/BCAT1/CRLF2/PSMB5/HSPA4/E2F6/MFAP3L/PSMD12/FADS1/PRDX6/MRPL40/SNN/UBAC1/ARMC9/…
GSE2770_UNTREATED_VS_ACT_CD4_TCELL_48H_UP	GSE2770_UNTREATED_VS_ACT_CD4_TCELL_48H_UP	GSE2770_UNTREATED_VS_ACT_CD4_TCELL_48H_UP	188	0.275963	1.44426	0.00190723	0.0117472	0.00820304	8027	tags=39%, list=24%, signal=30%	RBM19/DDX31/MEGF6/DOT1L/DNAJA3/SLC25A32/ILF3/SLC5A6/ABHD5/SLC25A33/SFXN4/ITGAM/MRPS35/DIMT1/TRIM27/PAFAH1B2/MYL9/SMG8/TAPT1/DDX28/DGKH/DNAAF5/RAB11FIP2/PNP/TRAM1/PNPT1/CANX/PPP2CA/OPA1/LIG3/GHITM/TGFBRAP1/CCT5/NAA15/TYW3/PDE4DIP/KCNH8/CRLS1/GTF2A1/FAM83B/ENOX1/IPPK/SNX10/H2BC12/AAAS/PSMD10/BCLAF1/VDAC1/NUBP1/C1QBP/RNPC3/TRUB2/WDR77/PNPO/RPP40/DNAJC10/PLAA/BRD2/POLR3B/RRP1B/RABL3/NUS1P3/ATAD3B/DCA…
GSE21360_NAIVE_VS_SECONDARY_MEMORY_CD8_TCELL_UP	GSE21360_NAIVE_VS_SECONDARY_MEMORY_CD8_TCELL_UP	GSE21360_NAIVE_VS_SECONDARY_MEMORY_CD8_TCELL_UP	178	0.277879	1.44289	0.00262966	0.0153255	0.0107018	5985	tags=33%, list=18%, signal=27%	CD79A/ITGA5/MICALL2/SLC39A13/NOS2/CLCN7/POU2AF1/FCRL5/BLK/IGF2BP2/ABCC1/RTN2/IL1RN/DSC1/HK2/FLNB/RELT/SRC/RAB30/SH2B2/KLF7/ARHGAP31/VASP/SLC39A1/SLC31A2/PEG10/ADAMDEC1/TRAF3IP2/DGAT2/HERPUD1/CYBB/DTX2/GSR/SLC11A2/TMEM26/GPD2/DGKH/FCMR/LPP/NFKBIE/SH3BP5/VCAN/PGAM1/LAMA2/TNF/IRAK3/SLC1A2/VCL/BYSL/MET/SIK1/CHI3L1/RAB11FIP1/LRRC25/RAB20/CD40/TARM1/ADGRG6/LPCAT2
GSE5589_LPS_AND_IL10_VS_LPS_AND_IL6_STIM_IL6_KO_MACROPHAGE_45MIN_DN	GSE5589_LPS_AND_IL10_VS_LPS_AND_IL6_STIM_IL6_KO_MACROPHAGE_45MIN_DN	GSE5589_LPS_AND_IL10_VS_LPS_AND_IL6_STIM_IL6_KO_MACROPHAGE_45MIN_DN	197	0.274134	1.44261	0.00166653	0.0104812	0.00731898	9089	tags=41%, list=27%, signal=30%	ANAPC13/GGA1/GLIS3/PEX5/DDX3X/CCDC47/ACTN1/FLNA/ST13/NPC1/DOCK5/CLUH/PLIN2/TKT/OSGIN1/ITGB3/CAMK1/IPO4/ATP13A3/TJP3/TMBIM1/ATP11C/HVCN1/CCDC22/SDC1/VAPA/SNX9/AIFM2/PABPC4/HADHA/SLC11A1/SOX7/SCAMP3/AFF4/IQSEC1/SEPHS2/DDX19A/LRRC39/MMGT1/UBTD1/SH3BGRL3/STAB2/PLXDC2/GPCPD1/FAM83F/NEURL2/GNA12/ICAM4/DENND4B/MICOS10/RIT1/MRPL20/SPNS1/TRUB2/SYK/SORD/RXRA/KLHL9/BAG6/PRKAR2A/HADHB/HNMT/RAPH1/MGST1/KIF1C/…
GSE17721_POLYIC_VS_CPG_12H_BMDC_DN	GSE17721_POLYIC_VS_CPG_12H_BMDC_DN	GSE17721_POLYIC_VS_CPG_12H_BMDC_DN	197	0.273598	1.4398	0.00174589	0.0109051	0.00761502	7045	tags=36%, list=21%, signal=28%	CTU1/CCL24/ARHGAP24/SLC12A3/UFM1/RRN3/SLC6A8/SFXN3/ABCC1/NIBAN2/BOP1/SRSF6/GPATCH4/EIF4E/LTV1/DCAF13/KCMF1/POLR3D/LYRM2/NOC2L/FAM118A/EIF4G2/PDE8A/LRRC59/GDF15/FTH1/PEA15/CLCC1/TRAF3IP2/ACVR1B/HSD3B7/AKR1B1/ACO1/HOXA13/PEX12/FASN/CLEC4A/PBDC1/NRSN1/AP4S1/SLC52A2/RNASEK/UBE2W/ATAD3A/FARSA/BYSL/RNF128/TRPM5/ELOC/ACSS2/PDLIM7/SPRYD7/ZNF276/MTAP/RHOA/SMIM30/RAB10/EIF2S3/IPO7/EIF5A/LRRC58/DPP3/DENR/DN…
GSE26351_UNSTIM_VS_WNT_PATHWAY_STIM_HEMATOPOIETIC_PROGENITORS_DN	GSE26351_UNSTIM_VS_WNT_PATHWAY_STIM_HEMATOPOIETIC_PROGENITORS_DN	GSE26351_UNSTIM_VS_WNT_PATHWAY_STIM_HEMATOPOIETIC_PROGENITORS_DN	199	0.273259	1.43946	0.00175649	0.0109572	0.00765141	8261	tags=36%, list=25%, signal=27%	POF1B/VPS9D1/DDX31/RGCC/ZPR1/GLIS3/MAP4K4/RPUSD4/PCMT1/ABHD5/YTHDF1/TFB2M/EDN1/ST13/NECAP1/SLC23A2/SRC/CHMP7/ZNF330/DCAF13/TTLL11/TBL2/TSACC/PXDC1/CXorf56/ENG/MCRIP2/CEP170/NFYC/BAMBI/RNF216/GLRX3/PPP2CA/PINK1/ETF1/PEX10/MMGT1/DSE/PIK3R4/LARS1/NDUFA5/PLBD2/C5orf51/CPQ/GTF3C4/ELOA/EFNB2/FYTTD1/NCOA3/KPNB1/PTPRA/MYDGF/NKRF/CMYA5/SMAD1/FAM3C/B4GALT1/TRIM8/TMEM209/RRP1B/ADAM9/DYNLT3/ZNF106/JDP2/ORMDL…
GSE45739_NRAS_KO_VS_WT_ACD3_ACD28_STIM_CD4_TCELL_UP	GSE45739_NRAS_KO_VS_WT_ACD3_ACD28_STIM_CD4_TCELL_UP	GSE45739_NRAS_KO_VS_WT_ACD3_ACD28_STIM_CD4_TCELL_UP	198	0.273124	1.43853	0.00182801	0.0113453	0.00792239	6807	tags=36%, list=20%, signal=29%	DNAJA3/PNMA8A/NR4A3/TWNK/ATF1/SPRED2/MRTO4/DUSP6/PNO1/STIP1/PIM3/URB2/REEP3/ADO/DCAF4/PDSS1/SMIM13/ZNF330/DHX15/LTV1/OTUD4/TNFRSF12A/NIP7/RRP15/PPP1R15B/TRMT10C/MSC-AS1/NAB2/IDH3A/RPF2/BCCIP/EML4/DIMT1/ZHX1/SEH1L/NCL/PITPNA/MCRIP2/SPRED1/SLAIN2/JPH1/ZNFX1/TMEM158/CCT6A/DDX19A/GATAD2A/SVIL/SH2B3/KLF6/UTP14A/GNPNAT1/FUT4/NETO2/HSPA5/NDST1/WDR12/LARP4/QTRT2/KCTD9/ATG101/EIF2S1/FBXO30/BZW1/RAB18/PRPF…
GSE46606_IRF4MID_VS_WT_CD40L_IL2_IL5_DAY3_STIMULATED_BCELL_UP	GSE46606_IRF4MID_VS_WT_CD40L_IL2_IL5_DAY3_STIMULATED_BCELL_UP	GSE46606_IRF4MID_VS_WT_CD40L_IL2_IL5_DAY3_STIMULATED_BCELL_UP	196	0.27318	1.43754	0.00165589	0.0104501	0.0072973	4279	tags=23%, list=13%, signal=20%	TLE1/ADM/CCDC169/FILIP1L/SPHK1/RHBDF1/MYCL/MOB3B/JARID2/LSR/TRIM36/LGI4/STIP1/EDN1/ZFAND5/CD83/CCRL2/PSD3/SRC/DHX15/LTV1/CX3CL1/MAPK6/DCAF13/OAF/ESF1/RRP15/PPP1R15B/DOCK3/FGF9/LRCH1/IL17RA/TMBIM1/SEH1L/VAPA/STARD7/SPRED1/CLIC4/HIVEP3/CDV3/BRIX1/PPFIBP1/SLC2A6/IPO5/KLF6
GSE10240_IL17_VS_IL17_AND_IL22_STIM_PRIMARY_BRONCHIAL_EPITHELIAL_CELLS_DN	GSE10240_IL17_VS_IL17_AND_IL22_STIM_PRIMARY_BRONCHIAL_EPITHELIAL_CELLS_DN	GSE10240_IL17_VS_IL17_AND_IL22_STIM_PRIMARY_BRONCHIAL_EPITHELIAL_CELLS_DN	193	0.273431	1.43615	0.00187193	0.0115737	0.00808185	4958	tags=25%, list=15%, signal=21%	CD79A/VPREB3/TLE1/CARMIL1/CBFA2T3/KAZALD1/LONRF1/TBXA2R/TRIM54/RYR1/HDAC9/TCF4/CCDC162P/PLCL1/PKIG/CHST15/HBEGF/PSD3/FPGS/SRSF6/GPATCH4/ABL2/TNFRSF17/SLIT3/KLHDC10/CTNND2/TSPAN33/DLG4/SORT1/ESR1/ENG/MAP4K3/ZNF667/AQP9/INSR/ZC3H12C/TACR2/SLC29A3/PIK3R4/GTF2IRD1/MGAT1/HEMK1/TNFRSF21/MRM1/CUX1/IL7R/SMCO2/DCLK2
GSE369_IFNG_KO_VS_WT_LIVER_DN	GSE369_IFNG_KO_VS_WT_LIVER_DN	GSE369_IFNG_KO_VS_WT_LIVER_DN	194	0.273069	1.43588	0.00226138	0.0135683	0.00947472	6604	tags=33%, list=20%, signal=27%	SYNDIG1L/NFX1/KBTBD8/UFM1/EIF4G1/BTLA/DPH6/SLC16A6/TFB2M/EARS2/BOP1/ATP1A1/FPGS/SRSF6/EIF4E/CLUH/AKAP1/GEMIN5/CCR7/TRMT10C/EIF6/ODC1/EMG1/HMBS/USP16/G6PD/KCTD5/COA7/B3GNT5/ATP6V1H/AIMP2/PNPT1/LMO2/GATB/TSPAN3/SPART/PTCD2/EIF4A1/C1orf122/UTP14A/TIMM23/USP14/PMPCA/TOMM40/FARSA/NAF1/NOL8/WDR89/HSPA5/WDR12/DNAJC11/SLC15A3/FABP5/EIF2S3/MRPL20/SND1/IPO7/C1D/C1QBP/NME4/PNPO/CEBPZ/GRPEL1/TXNL1
GSE21379_WT_VS_SAP_KO_TFH_CD4_TCELL_UP	GSE21379_WT_VS_SAP_KO_TFH_CD4_TCELL_UP	GSE21379_WT_VS_SAP_KO_TFH_CD4_TCELL_UP	194	0.27296	1.43531	0.00226138	0.0135683	0.00947472	5945	tags=30%, list=18%, signal=25%	TEAD2/TIE1/AKAP12/ASAP2/DLC1/SELP/FSCN1/NRP1/XDH/KANK3/SLC9A3R2/TEK/SLC7A8/RASGEF1B/RAB34/MAPK13/TTC23/TRIP6/LHPP/ZNF697/DMKN/DOCK5/RALB/ADGRA2/TNFAIP8L1/ITGB3/OPHN1/PIANP/ZNF385A/ESAM/TFPI/MTUS1/SH3D19/LAMB2/DGAT2/MRC1/DUSP9/SGK1/RND3/DLK1/AXL/CDC42BPB/P3H3/GUCA1A/LDB2/IFT43/CTNND1/MYO1E/S100A1/DAB2/USP54/GSTM1/USP2/GHR/DOCK6/CLEC11A/RIN1/ABCC3/AP2S1
GSE11864_UNTREATED_VS_CSF1_IFNG_PAM3CYS_IN_MAC_DN	GSE11864_UNTREATED_VS_CSF1_IFNG_PAM3CYS_IN_MAC_DN	GSE11864_UNTREATED_VS_CSF1_IFNG_PAM3CYS_IN_MAC_DN	191	0.273528	1.43493	0.00208817	0.0127169	0.00888021	7803	tags=38%, list=23%, signal=29%	RBM19/PLEKHO1/QSOX2/CLN8/NOS1/TRMT2A/CSF1/SERPINE1/ITPKC/ZFYVE16/ZNF746/ABCE1/UTP20/PSMC6/ZNF804A/NECTIN2/LIFR-AS1/FPGS/SQSTM1/POLR3C/MTMR9/TMEM41B/TLR1/HSPA9/DOCK3/RNMT/TDP2/VPS53/TMED1/SNX9/COQ9/SLC11A2/SMG8/DGKH/SCAMP3/PNP/PSMA1/GHITM/HCG4/PI4K2A/HAS1/STAM2/CALU/ANO5/CLEC18A/CD180/LRWD1/ISOC1/DAB2/JPT2/HMGCR/ATG101/MYDGF/GAPT/C4orf54/IPO7/RAP2C/ACP5/PLEKHO2/SEC61A1/RLN3/HARBI1/PPM1B/NEXMIF/ADA…
GSE21927_SPLEEN_VS_TUMOR_MONOCYTE_BALBC_DN	GSE21927_SPLEEN_VS_TUMOR_MONOCYTE_BALBC_DN	GSE21927_SPLEEN_VS_TUMOR_MONOCYTE_BALBC_DN	187	0.273964	1.43261	0.00257927	0.01514	0.0105722	6787	tags=34%, list=20%, signal=27%	TCL1A/JUP/SERTAD2/SOX8/AKAP12/TCF7L2/RYR1/HMG20B/LIMS2/RNF157-AS1/TCF4/LONRF2/TSPAN13/URB2/SLC7A6/ABCE1/REEP3/RGS20/MLXIP/ARRDC4/LEF1/LAMP5/DHX9/RB1/PRR4/TRIB1/SOGA1/NOC2L/PRKAG2/YJU2/DNAJC3/DIMT1/ATP11C/GNAI1/PTBP1/LMTK2/SPG21/CXXC5/CDHR5/TUFM/PHC1/SOX30/BTBD3/CSF2/SYNCRIP/PLEKHB2/TRIM35/CASTOR3/IGF2R/ATG101/C3orf52/SH3BGR/TMX3/EIF2AK3/THTPA/RTN3/SMAD1/DCLK3/SH3BGRL/HRK/CACNA1I/SNX27/LCP1
GSE22886_NAIVE_CD4_TCELL_VS_NKCELL_UP	GSE22886_NAIVE_CD4_TCELL_VS_NKCELL_UP	GSE22886_NAIVE_CD4_TCELL_VS_NKCELL_UP	193	0.27273	1.43247	0.00202792	0.0123965	0.00865647	6764	tags=31%, list=20%, signal=25%	AQP3/HMGA1/RAB40C/TNS2/CD27/PLK3/TNFRSF10D/SMYD5/KAT8/FCER2/TBC1D4/MAP4K4/TRMT1/RETREG1/ADTRP/DAGLA/TUBBP5/SIRPG/CD28/VIPR1/ATP1A1/LEF1/CHMP7/AKAP1/GABBR1/MORC4/NOL6/EPHB6/TJP3/SFRP5/KCNC3/EIF3D/PABPC4/TOM1/TLE2/MCF2L/PLEKHB1/PLEKHM2/SARAF/BAG3/INF2/SLC25A37/IZUMO4/GRSF1/SERINC5/FAM171A1/EPHB4/LZTS3/GAS2L1/CCNC/SUGCT/BCLAF1/PASK/NELL2/LYPD3/SUN1/PKIA/CACNA1I/RPS6KA2
GSE22229_RENAL_TRANSPLANT_IMMUNOSUPP_THERAPY_VS_HEALTHY_PBMC_DN	GSE22229_RENAL_TRANSPLANT_IMMUNOSUPP_THERAPY_VS_HEALTHY_PBMC_DN	GSE22229_RENAL_TRANSPLANT_IMMUNOSUPP_THERAPY_VS_HEALTHY_PBMC_DN	196	0.272012	1.43139	0.0019713	0.0120807	0.00843593	6884	tags=33%, list=21%, signal=26%	DSP/TMEM178A/RGCC/REEP1/ABCA9/NAGPA/OLR1/RYR1/ELANE/XDH/SLC8B1/MCEMP1/CD28/ALAS1/DMKN/TMEM38B/RALB/ZNF330/ITGB3/SH2B2/MORC4/ABCA13/TLR1/SYPL1/SLC36A4/UGDH/MTUS1/CSDE1/PLOD3/MGAM/HERPUD1/CYBB/G6PD/SLAIN2/CRY1/TIAM1/SEPTIN10/RND3/EDEM1/SGMS2/ZNF518B/PPFIBP1/SOWAHC/LGALS3/PAPSS2/RRBP1/SEC63/CHSY1/ADGRE1/ATP11A/EIF1AD/LRRK2/ITPR1/LPL/WDR1/LAMP1/SATB2/CLEC7A/MS4A3/B4GALT1/TFEC/PTPRO/RPS6KA2/CLEC5A
GSE3565_CTRL_VS_LPS_INJECTED_DUSP1_KO_SPLENOCYTES_DN	GSE3565_CTRL_VS_LPS_INJECTED_DUSP1_KO_SPLENOCYTES_DN	GSE3565_CTRL_VS_LPS_INJECTED_DUSP1_KO_SPLENOCYTES_DN	169	0.277383	1.43054	0.00410749	0.0221859	0.0154924	3006	tags=21%, list=9%, signal=19%	INPP5F/EGR2/PLEKHO1/ANKRD55/FILIP1L/RALGPS2/GRK6/ALS2CL/MAP4K4/RETREG1/DUSP6/XKRX/CCR9/ACTN1/CHST15/TSPAN13/RAPGEF4/RPS6KA1/TCF7/S100Z/CNST/DAG1/NRIP1/LEF1/ST6GAL1/NSG2/TMIE/TRIM25/TLR1/TREML2/CCR7/PITPNM2/RPF2/TFRC/ENG
GSE22025_TGFB1_VS_TGFB1_AND_PROGESTERONE_TREATED_CD4_TCELL_DN	GSE22025_TGFB1_VS_TGFB1_AND_PROGESTERONE_TREATED_CD4_TCELL_DN	GSE22025_TGFB1_VS_TGFB1_AND_PROGESTERONE_TREATED_CD4_TCELL_DN	179	0.274551	1.42758	0.00396098	0.0214421	0.014973	4502	tags=24%, list=13%, signal=21%	CXCR5/RRP12/CD79A/COL6A3/GEM/PCDHGA12/TNFSF14/STK38L/HSPA12A/ELANE/CEACAM6/TPBG/HMG20B/ATF3/SGCG/MAP2K3/CHERP/SLC6A12/ONECUT2/FLII/SHOX2/PICK1/CLDN3/WNT1/HBEGF/HYAL1/CAMSAP2/FGFR4/SLC16A1/EIF3B/KCNC3/RREB1/GRIK2/GOT2/SUSD6/CD44/EIF3A/PCDH7/TGFB1/OSBPL8/PPIP5K1/REL/SMURF1
GSE3982_MAST_CELL_VS_BASOPHIL_UP	GSE3982_MAST_CELL_VS_BASOPHIL_UP	GSE3982_MAST_CELL_VS_BASOPHIL_UP	186	0.273077	1.42744	0.00271944	0.015698	0.0109619	7456	tags=37%, list=22%, signal=29%	RAI14/DUSP14/ZPR1/WDR74/TSC22D1/DPH2/RTN2/MLXIP/MSANTD2/ST13/DNAJB12/TRAP1/RDH8/GFOD1/IARS1/BPI/MAPK6/TGFB1I1/CAMSAP2/HIGD1A/FGFR4/ATP13A3/ESF1/HYOU1/YWHAQ/SORT1/ANKRD40/ABCF2/SEH1L/AP3D1/CERS6/AIMP2/SLC29A3/SGK2/OPA1/EIF4A1/STXBP2/CD101/MRM1/CTNND1/NRBP1/ATP8A2/WDR12/MRPL4/SLC30A1/FAM171A1/CUL2/ATG101/UGGT2/STXBP1/ENO1/GFPT2/DCTPP1/CTSL/WDR77/CRLF2/YBX3/FAM3C/SEC14L5/NME1/PRKAR2A/PSMD12/RGS13/UB…
GSE20366_EX_VIVO_VS_DEC205_CONVERSION_NAIVE_CD4_TCELL_DN	GSE20366_EX_VIVO_VS_DEC205_CONVERSION_NAIVE_CD4_TCELL_DN	GSE20366_EX_VIVO_VS_DEC205_CONVERSION_NAIVE_CD4_TCELL_DN	186	0.273061	1.42735	0.00271944	0.015698	0.0109619	4971	tags=28%, list=15%, signal=24%	IGHG1/TNFRSF13C/HIC2/SCG5/CCDC86/ALB/ANXA1/NRP1/JARID2/DUS4L/SFXN3/ATF3/KLF9/TAGLN3/PDE2A/CYSTM1/NIPAL4/NRN1/RASGEF1B/TUSC1/ZBTB21/PIM3/URB2/CD83/IMMP2L/POLR3F/CYP2C8/KLF7/SLC9A2/ALCAM/SLC38A2/CCDC88A/FAM83E/VSIG4/HSD3B7/SQOR/VAMP3/GNAQ/BAMBI/SGK1/WDR43/FCMR/ETF1/GUCA1A/KPNA1/PNPLA8/ENO4/VCL/CPQ/GJB4/TBC1D30/SLC26A10
GSE27434_WT_VS_DNMT1_KO_TREG_DN	GSE27434_WT_VS_DNMT1_KO_TREG_DN	GSE27434_WT_VS_DNMT1_KO_TREG_DN	199	0.27094	1.42724	0.00199601	0.0122168	0.00853094	8352	tags=41%, list=25%, signal=31%	CDKN1A/EGR2/PHLDA1/IL1B/MIDN/SELP/SERPINE1/ILF3/TXNRD1/GPC4/ZNF703/PROCR/NDEL1/ACSL4/IL1RN/CD83/IL1A/PTGS2/MRAS/SQSTM1/ATP13A3/PDGFA/DDX5/ANKRD28/PDE8A/UGDH/CLEC4D/CRABP2/ATP6AP1/MMP13/RREB1/ATP6V1H/SERPINB2/UTP4/SGK1/INHBA/ETF1/PIK3CA/LPAR1/SARAF/EIF5/GJA1/TNF/VCL/CLEC4E/RHOQ/MAP2K4/FAM102A/MOB1B/LIN7C/EEA1/BTG2/RIOK3/CCL7/EFNB2/XPOT/PLAUR/TAX1BP1/STT3B/SLC20A1/FOS/RAB18/EPC1/CPEB2/LRRC58/MADCAM…
GSE17721_0.5H_VS_8H_GARDIQUIMOD_BMDC_DN	GSE17721_0.5H_VS_8H_GARDIQUIMOD_BMDC_DN	GSE17721_0.5H_VS_8H_GARDIQUIMOD_BMDC_DN	194	0.271422	1.42722	0.00241734	0.0143451	0.0100171	7066	tags=36%, list=21%, signal=28%	CHRD/GEM/BOC/MAP11/UFM1/SLC6A8/COL13A1/ZFYVE16/ACVR1/TSC22D1/RUSC2/FICD/PIM3/HLA-B/ACSL4/ACSL5/INPPL1/TXN/HK2/FEM1B/CCL2/CCNL2/BHLHE41/OTUD4/MORC3/SH3BP2/NAB2/NUS1/ITPRID2/FAM20C/TRAF3IP2/YTHDF2/HECTD1/TMEM128/INO80C/PSMB7/SUSD6/LPP/DLK1/DPYSL2/PPP2CA/MKKS/OPA1/TBC1D1/ZBTB1/ATP6V0B/C5orf51/SYNCRIP/PLXNA1/SPPL2A/CAVIN4/ATP2A2/SRFBP1/PAPSS1/NAMPT/ENTR1/PLAUR/TAX1BP1/ITPKB/NLGN2/SATB2/RAB18/SLC30A7/…
GSE23568_ID3_KO_VS_WT_CD8_TCELL_DN	GSE23568_ID3_KO_VS_WT_CD8_TCELL_DN	GSE23568_ID3_KO_VS_WT_CD8_TCELL_DN	196	0.270683	1.4244	0.002129	0.0129172	0.00902003	6139	tags=32%, list=18%, signal=26%	CXCR5/CBFA2T3/PER2/CD19/FCRLA/CR2/FCER2/POU2AF1/RYR1/IGLC7/HLA-DOB/RALGPS2/PLCG2/ANXA1/BLK/TTC4/TRMT2A/JARID2/CA2/PDE1C/SPIB/TCF4/PLD4/PKIG/MS4A1/CD83/CD79B/EBF1/SIPA1L2/ARHGAP21/SYPL1/MBD4/SNX9/CLIC4/GPD2/ZC3H12C/MYADM/CXXC5/LMO2/MTPN/NFE2L1/SOWAHC/NCF2/TMOD3/SH2B3/PTPN6/ATP6V0B/VCL/RHOQ/MYO1E/IQGAP1/EVI5/HHEX/LYL1/BCL2L2/CD40/MRPL45/MEF2C/EIF2AK3/PDXK/CLCN5/LYN
GSE4748_CTRL_VS_LPS_AND_CYANOBACTERIUM_LPSLIKE_STIM_DC_3H_UP	GSE4748_CTRL_VS_LPS_AND_CYANOBACTERIUM_LPSLIKE_STIM_DC_3H_UP	GSE4748_CTRL_VS_LPS_AND_CYANOBACTERIUM_LPSLIKE_STIM_DC_3H_UP	196	0.270545	1.42367	0.00236556	0.0141066	0.00985061	6560	tags=32%, list=20%, signal=26%	ENPP2/RGCC/TNS2/DPYSL3/RAI14/AKAP12/ANKRD1/ANXA1/CXCL12/GREM1/MMP10/ATF1/ILF3/SLC44A2/RRP1/CCDC47/EREG/MLXIP/CCND1/FEM1B/PLEC/ADGRA2/TGFB1I1/CDC42EP1/JAM2/CTNNA1/TDP2/FAM20C/RAP2A/SH3D19/HECTD1/MEMO1/GABARAP/SQOR/SGK1/KIAA0100/ISLR/MITF/SLC22A23/PIK3R4/GTF2IRD1/AMPD3/IMPACT/CLBA1/PAICS/FNDC3A/CD53/GSTO1/PLXDC2/NOP14/DAB2/AP3B1/GHR/IL1RAP/IL33/SOX9/ANTXR2/GFPT2/CLCN5/PRPF6/CXCL6/TSLP/TGFBI
GSE13522_CTRL_VS_T_CRUZI_Y_STRAIN_INF_SKIN_IFNAR_KO_UP	GSE13522_CTRL_VS_T_CRUZI_Y_STRAIN_INF_SKIN_IFNAR_KO_UP	GSE13522_CTRL_VS_T_CRUZI_Y_STRAIN_INF_SKIN_IFNAR_KO_UP	197	0.270384	1.42288	0.00238076	0.0141625	0.00988963	4140	tags=25%, list=12%, signal=22%	GALNT9/RFLNB/RGCC/POU2AF1/IGLC7/RCBTB2/GRK6/DUSP7/ALS2CL/SPIB/DENND2D/APP/EHD3/XKRX/PLD4/ACTN1/RAPGEF4/TCF7/MCEMP1/PDLIM4/LDLRAP1/F2RL1/GPATCH4/CCND1/LEF1/TMIE/ITGB3/VSIR/SPSB1/SLC38A2/CCR7/ANXA5/ELOVL7/ACVR1B/IBTK/MSRA/PITPNA/GALNT6/GPD2/HID1/RANBP10/SLPI/SGK1/DNTT/ACVRL1/GPR180/HSD11B1/TYROBP/WDFY4
GSE360_DC_VS_MAC_T_GONDII_DN	GSE360_DC_VS_MAC_T_GONDII_DN	GSE360_DC_VS_MAC_T_GONDII_DN	191	0.271113	1.42226	0.00232019	0.013904	0.00970912	6839	tags=34%, list=20%, signal=27%	GEM/FOLR3/ABCB4/INSIG1/PTGDS/NDRG1/IGHA1/RCBTB2/SLC6A8/GPC4/DUSP6/LILRA2/FCN1/N4BP2L2-IT2/EMILIN1/NT5E/LGALS2/BCL2A1/TKT/CDA/CDC42EP1/SHB/TBL2/CTDNEP1/NOTCH3/CRABP2/PEG10/VSIG4/HERPUD1/EMP1/ALDH3B1/SLC19A1/ST3GAL5/SLC11A1/RND3/FCMR/CD52/RASAL2/PINK1/MCF2L/SH3BP5/VCAN/SLC29A2/ZMIZ1/PDIA4/ITGB1BP1/HSPA5/SIK1/GSTZ1/LMNA/HTR3A/CHMP2B/LYL1/EFNB2/TPP1/LPL/TIMP2/FOS/BCAT1/EGR4/SMPDL3A/ZDHHC17/RPS6KA2/RX…
GSE42021_CD24HI_TREG_VS_CD24HI_TCONV_THYMUS_DN	GSE42021_CD24HI_TREG_VS_CD24HI_TCONV_THYMUS_DN	GSE42021_CD24HI_TREG_VS_CD24HI_TCONV_THYMUS_DN	198	0.26969	1.42044	0.0022254	0.0134019	0.00935853	6849	tags=34%, list=21%, signal=27%	EFNA1/CDKN1A/EGR2/PHLDA1/IL1B/MIDN/SELP/PTPRF/SERPINE1/ILF3/TXNRD1/GPC4/ZNF703/HMOX1/PROCR/NDEL1/ACSL4/IL1RN/CD83/IL1A/PTGS2/PDGFA/TMEM41B/DDX5/KCMF1/KCNJ11/UGDH/ATP6AP1/MEMO1/FAM83H/ATP6V1H/SERPINB2/HOXD8/SPG21/SOX7/SGK1/ETF1/LPAR1/GSTM3/GJA1/SLC30A3/VCL/MAP2K4/CAVIN1/FAM102A/MOB1B/LIN7C/GPCPD1/EEA1/PISD/RAB12/BTG2/RIOK3/CYRIB/EXOSC5/CCL7/PLAUR/TAX1BP1/STT3B/SLC20A1/USF1/FOS/RAB18/CPEB2/LRRC58/L…
GSE6674_ANTI_IGM_VS_CPG_STIM_BCELL_DN	GSE6674_ANTI_IGM_VS_CPG_STIM_BCELL_DN	GSE6674_ANTI_IGM_VS_CPG_STIM_BCELL_DN	198	0.26964	1.42018	0.0022254	0.0134019	0.00935853	5547	tags=33%, list=17%, signal=28%	PRICKLE1/PER2/CDKN1A/QSOX2/TAF4B/UTP15/CCDC86/SLC25A32/TWNK/GEMIN4/UTP25/ATF3/TXNRD1/TSR1/YRDC/IFRD2/CHCHD4/SLC25A33/SLC7A1/HBEGF/PUS7/HK2/FPGS/UTP18/NOLC1/GRWD1/FKBP1A/DCAF13/NIP7/POLR3D/PPAN/NOC2L/SURF6/SYPL1/JAGN1/RPF2/DIMT1/AQP9/SPRED1/LAMTOR3/NDUFAF4/EEF1E1/GNAQ/UTP4/DHX33/WDR43/MAK16/TMEM158/LIG3/MAT2A/LARS1/HEMK1/TNF/RIOX1/ATAD3A/BYSL/NAF1/RGS1/CMTM6/AGPAT3/LARP4/USP10/MFSD2A/MTAP/SLC39A6/…
GSE21063_CTRL_VS_ANTI_IGM_STIM_BCELL_3H_UP	GSE21063_CTRL_VS_ANTI_IGM_STIM_BCELL_3H_UP	GSE21063_CTRL_VS_ANTI_IGM_STIM_BCELL_3H_UP	182	0.272333	1.41968	0.00370261	0.0203602	0.0142174	5063	tags=26%, list=15%, signal=22%	FCRL2/HMGA1/PLA2G4C/PER2/DTX1/LRRC8B/RYR1/TBC1D4/TTLL4/CCDC141/SPRY2/LSR/BTLA/NCLN/SF1/COL12A1/TCF7/MS4A1/SIRPG/CD28/ASAP1/PUS7/HK2/LEF1/LINC00641/TMEM91/TNFAIP8L1/SPSB1/IL6R/SPECC1/ATP11C/DKK3/CLUAP1/AXIN2/ADAMTSL4/EDEM1/AKIRIN1/MID1IP1/RASGRP3/BTBD3/TMEM14C/FBXO45/MDN1/FAM102A/ADGRE1/MRPL4/MICU3
GSE12845_IGD_POS_VS_NEG_BLOOD_BCELL_UP	GSE12845_IGD_POS_VS_NEG_BLOOD_BCELL_UP	GSE12845_IGD_POS_VS_NEG_BLOOD_BCELL_UP	194	0.26998	1.41964	0.00288522	0.0164215	0.0114671	4738	tags=23%, list=14%, signal=20%	CD79A/H4C11/DCHS1/ITGA5/DDX31/IGHV5-78/CD19/TNFSF14/MMP17/BCL6/CNTNAP2/FCER2/DBH/PCDH9/LIMS2/SF1/UXS1/BCL7A/CD28/GALNS/ZNF334/CROCCP3/DDX5/ICOSLG/TREML2/SH3BP2/PAN2/IDH3B/PACS2/RPL23AP53/RANBP10/WASF1/MAPK8IP3/PPFIBP1/CLEC4A/ANPEP/ECEL1/CDHR5/TCL6/SARAF/PHC1/CRTC3/TBC1D1/TTC9/APLP2
GSE360_T_GONDII_VS_B_MALAYI_HIGH_DOSE_DC_DN	GSE360_T_GONDII_VS_B_MALAYI_HIGH_DOSE_DC_DN	GSE360_T_GONDII_VS_B_MALAYI_HIGH_DOSE_DC_DN	194	0.269767	1.41852	0.00288522	0.0164215	0.0114671	5330	tags=26%, list=16%, signal=22%	ABCA6/SERTAD2/EGR2/ABCB4/IGHA1/KCNS3/PLCG2/GATD3A/RCBTB2/CD1B/LILRA2/STAC/EPHX2/EMILIN1/TKT/SPON1/MPO/SDC2/MAFK/CAMK1/SHB/TBL2/RNF6/CD1A/CRABP2/PEG10/NPTN/HERPUD1/PPP1R13B/ST3GAL5/ARHGEF18/RAB11FIP2/LMO2/PINK1/SLC29A2/KIAA0232/ZMIZ1/ZBTB1/NRGN/PDIA4/VCL/ADORA3/CD1E/CD164/EVI5/HHEX/SERINC5/CHMP2B/EPN2/LYL1
GSE2770_IL12_ACT_VS_ACT_CD4_TCELL_2H_UP	GSE2770_IL12_ACT_VS_ACT_CD4_TCELL_2H_UP	GSE2770_IL12_ACT_VS_ACT_CD4_TCELL_2H_UP	187	0.271205	1.41819	0.00295858	0.0167412	0.0116904	6483	tags=36%, list=19%, signal=29%	PNPLA7/ADM/ARAP3/RTN4RL2/TCF7L2/RHBDF1/NDRG1/NSMAF/GLIS3/ATP9B/KLK13/TSC22D1/EREG/PROCR/ADD2/NPC1/TMEM38B/ZFAND6/SH3GLB1/TLR6/BCL2A1/TRIO/LIMS1/NTSR1/JAKMIP2/SLC31A2/TRIM13/IGLV1-44/ACVR1B/RET/PHC2/SNX9/SLC11A1/DGKH/PNP/PINK1/DDX60L/SH3BP5/TCL6/PNPLA8/HAS1/CXCL8/FKBP15/EVI2A/CLEC4E/MET/GSTO1/ZNF16/VPS37A/NDST1/RALA/TMEM251/LRRC8D/LINC01426/CCL7/DAB2/ST20/HM13/C3orf52/PLAUR/MROH6/BRI3/VAV3/LEPROT/…
GSE16266_LPS_VS_HEATSHOCK_AND_LPS_STIM_MEF_UP	GSE16266_LPS_VS_HEATSHOCK_AND_LPS_STIM_MEF_UP	GSE16266_LPS_VS_HEATSHOCK_AND_LPS_STIM_MEF_UP	183	0.271907	1.41754	0.00358718	0.0198374	0.0138524	1948	tags=16%, list=6%, signal=15%	CXCR5/CD79A/CPA5/LTBP2/TNFRSF13C/CD19/NKAIN1/IGKC/PKP2/CR2/FCER2/POU2AF1/RASL10A/HLA-DOB/PLCG2/KLK7/BLK/FCRL1/RNF41/SPIB/TCF4/MYO1C/PLD4/EVI2B/CAPN3/MS4A1/CD83/CD79B/HNRNPH2
GSE41176_UNSTIM_VS_ANTI_IGM_STIM_TAK1_KO_BCELL_24H_UP	GSE41176_UNSTIM_VS_ANTI_IGM_STIM_TAK1_KO_BCELL_24H_UP	GSE41176_UNSTIM_VS_ANTI_IGM_STIM_TAK1_KO_BCELL_24H_UP	196	0.26931	1.41717	0.00236556	0.0141066	0.00985061	6529	tags=33%, list=20%, signal=26%	SIRT7/RCBTB2/TKFC/CPNE6/MAN2C1/HMG20B/ITIH3/C1orf54/TSC1/GPC4/TRIP6/ZNF219/GCLC/DHRS9/S100A13/GORASP1/FKBP1A/TOR1B/CROCCP3/PRR4/ALCAM/SLC38A2/FBXO11/MLYCD/XPC/NSUN5P1/CRABP2/LAMB2/MRPS18B/STARD7/SPATA20/TP53I3/BCAP31/TIAM1/GOSR1/CD52/POLD4/KLHL20/EIF5/ASPHD1/PPARG/PMPCA/TBC1D1/NRGN/ITIH4/GPATCH3/FGL2/CD180/GLIPR1/CD9/TRIM38/PTPRA/RASAL1/AAAS/SND1/MEF2C/NCKIPSD/RNH1/BAG1/CEBPA/NME4/SMAD1/ME1/HIGD2A
GSE1925_CTRL_VS_3H_IFNG_STIM_MACROPHAGE_UP	GSE1925_CTRL_VS_3H_IFNG_STIM_MACROPHAGE_UP	GSE1925_CTRL_VS_3H_IFNG_STIM_MACROPHAGE_UP	196	0.269245	1.41683	0.00236556	0.0141066	0.00985061	4744	tags=26%, list=14%, signal=22%	STAT6/SLC25A25/DPYSL3/NPEPL1/SMYD5/MSRB1/ANXA1/AHCYL1/JARID2/SLC5A6/ZSWIM7/ST6GALNAC4/PNO1/RSPH3/PPRC1/TFB2M/BOP1/ASAP1/HK2/FPGS/LEF1/BCL2A1/CCL2/VCP/IPO4/TGM2/PPAN/NOP16/GEMIN5/NAB2/DNAJC3/SPECC1/ODC1/VARS1/METTL1/G6PD/LETM1/SLC19A1/TAOK3/GPD2/PABPC4/AIMP2/LMO2/TYROBP/LGALS3/EIF4A1/UTP14A/GJA1/PACSIN1/RPL7L1/BYSL
GSE22033_UNTREATED_VS_ROSIGLITAZONE_TREATED_MEF_DN	GSE22033_UNTREATED_VS_ROSIGLITAZONE_TREATED_MEF_DN	GSE22033_UNTREATED_VS_ROSIGLITAZONE_TREATED_MEF_DN	187	0.270756	1.41584	0.00303444	0.017032	0.0118934	4903	tags=25%, list=15%, signal=21%	RRP12/CLDN14/ARAP3/CASP5/PER2/DKK2/STK38L/SLC25A32/TPBG/HMG20B/PIP5K1B/SLC16A6/COQ7/ASAP1/DHRS9/ZNF23/SLC23A2/TMEM43/CCND1/SH3GLB1/BCL2A1/OSGIN1/ATP13A3/SIDT2/GLS/SLC17A9/CALCOCO1/BTBD7/CTNNA1/MAN1A1/TFRC/MAP4K3/PITPNA/EMP1/MATK/CHGA/CCNA1/MAT2A/FAM13B/REN/NR1H2/ADIPOR2/MAPK1IP1L/CUX1/MYO1E/CHSY1
GSE16385_ROSIGLITAZONE_IL4_VS_IFNG_TNF_STIM_MACROPHAGE_UP	GSE16385_ROSIGLITAZONE_IL4_VS_IFNG_TNF_STIM_MACROPHAGE_UP	GSE16385_ROSIGLITAZONE_IL4_VS_IFNG_TNF_STIM_MACROPHAGE_UP	200	0.268452	1.41521	0.00248059	0.0146668	0.0102418	4345	tags=22%, list=13%, signal=19%	RBM38/INPP5F/COL6A3/PER2/EGR2/TOB1/PLK3/ANKRD55/TNFSF14/LRRC8B/ATF1/TSC22D2/SCML1/DENND2D/ZFYVE16/ACVR1/CCR9/QPCT/ACTN1/EDAR/MLXIP/NRIP1/CHMP7/BCL2A1/IL6R/CCR7/SH3YL1/NAB2/MTUS1/RNF6/KLF10/CLEC16A/NPTN/COQ10B/HERPUD1/CEP170/TIAM1/RNF4/PARP12/GOSR1/PLN/BAG3/OSBPL8
GSE15330_GRANULOCYTE_MONOCYTE_PROGENITOR_VS_PRO_BCELL_DN	GSE15330_GRANULOCYTE_MONOCYTE_PROGENITOR_VS_PRO_BCELL_DN	GSE15330_GRANULOCYTE_MONOCYTE_PROGENITOR_VS_PRO_BCELL_DN	197	0.268461	1.41276	0.00253948	0.0149605	0.0104469	5245	tags=26%, list=16%, signal=22%	SYPL2/KAZALD1/INCA1/CR2/RALGPS2/GRK6/ABCB9/KRBA1/WBP2/ILF3/LIMS2/SFXN3/PAX5/SYVN1/FLII/MS4A1/S100A13/DNAJC12/PI4KA/MRAS/KLHL26/STX4/RABGEF1/ARHGAP5/ABCD1/LTO1/PIP5K1C/WSB1/ANXA11/NRBF2/LAT/DNAJC3/DNASE1L1/MINK1/NFYC/GPX3/SLC44A1/MYO9B/UQCRHL/RNF4/PPP2CA/DAPP1/S100A6/CRIM1/FNDC3A/VPS37A/LAPTM5/EXOC1/CMTM6/SRFBP1/TAF13
GSE4984_UNTREATED_VS_VEHICLE_CTRL_TREATED_DC_UP	GSE4984_UNTREATED_VS_VEHICLE_CTRL_TREATED_DC_UP	GSE4984_UNTREATED_VS_VEHICLE_CTRL_TREATED_DC_UP	147	0.279264	1.41256	0.0081423	0.0386897	0.0270169	5174	tags=29%, list=15%, signal=24%	ITGA5/ANKRD55/TBXA2R/TOP1MT/GRK6/UBE2R2/UTP25/ITPKC/TSC1/APP/RPH3AL/FLNA/ACOX3/MS4A1/FBXO38/TLR6/NT5E/TLR9/CCL2/TNFAIP8L1/SIPA1L2/FBXO11/MLYCD/PPARGC1B/ESR1/ZHX1/EXD2/BSDC1/CERS6/ACVRL1/HSD11B1/SLC45A2/DSE/SARAF/SLC29A2/RASGRP3/HYKK/CELSR1/FAM102A/BEND4/RAB11FIP1/ACSS2
GSE27859_MACROPHAGE_VS_DC_DN	GSE27859_MACROPHAGE_VS_DC_DN	GSE27859_MACROPHAGE_VS_DC_DN	178	0.272	1.41236	0.0046019	0.0244232	0.0170546	5894	tags=29%, list=18%, signal=24%	ARHGAP24/ANKK1/RGL3/CHRM5/UBE2R2/IMPA2/UBXN11/LGI4/CLCNKB/SLC8B1/RSPH3/ABHD5/DMBX1/SCN1A/IL20RB/DAG1/ATN1/ZFAND6/PLIN2/FTH1P5/CYGB/TRIM25/MFHAS1/GRIN3B/ARAP1/PPP1R15B/KIF1B/SEPTIN3/KCNC4/SLC31A2/FTH1/PELI3/ANKRD42/SHANK3/ADAMTSL4/TSPAN3/NR1H3/SVIL/LGALS3/INF2/CBX7/SERINC2/CCDC38/CD9/LZTS3/FAM9B/TBC1D9/LYSMD1/CPD/ZDHHC8/CLN3
GSE22611_UNSTIM_VS_2H_MDP_STIM_NOD2_TRANSDUCED_HEK293T_CELL_DN	GSE22611_UNSTIM_VS_2H_MDP_STIM_NOD2_TRANSDUCED_HEK293T_CELL_DN	GSE22611_UNSTIM_VS_2H_MDP_STIM_NOD2_TRANSDUCED_HEK293T_CELL_DN	183	0.27087	1.41214	0.00418504	0.0224802	0.0156978	3419	tags=20%, list=10%, signal=18%	MMP1/TRPA1/RBM38/EIF2B5/DDX31/ADNP2/KLHL29/LRRC8B/GATD3A/CPNE6/PTPRF/GEMIN4/WBP2/MT1H/RNF41/SLC9A3R2/GPC4/NDUFA4L2/DNAJC22/TSPAN1/JAG1/COL9A3/ACOX3/CD28/SRSF6/CCND1/NSG2/ZNF354A/KLHL26/MRPS30/CD209/CRABP2/MYT1/DCTN6/SLC19A1/MRPS10
GSE2770_TGFB_AND_IL4_VS_TGFB_AND_IL12_TREATED_ACT_CD4_TCELL_2H_DN	GSE2770_TGFB_AND_IL4_VS_TGFB_AND_IL12_TREATED_ACT_CD4_TCELL_2H_DN	GSE2770_TGFB_AND_IL4_VS_TGFB_AND_IL12_TREATED_ACT_CD4_TCELL_2H_DN	191	0.268984	1.41109	0.00317092	0.0177368	0.0123855	8826	tags=44%, list=26%, signal=33%	PER2/NEURL4/DOT1L/UNK/SLC25A32/ITPKC/DDX47/SLC25A33/DBH-AS1/TFB2M/ZFAND5/FCN1/DAG1/SFXN4/FTH1P5/NSUN2/EIF3B/TVP23B/EIF4G2/TAF1A/ABCF2/FTH1/RBM12/EMG1/TRIM27/PAFAH1B2/TMEM128/CLIC4/DNAAF5/OPA1/LIG3/PBDC1/TMOD3/PPIP5K1/TYW3/NAA50/PDE4DIP/ATP6V0A2/CUL4A/CRLS1/SYNCRIP/PLXNA1/MED6/LIN7C/LRP12/NHEJ1/ABITRAM/QTRT2/IPPK/PLAUR/GABRE/BZW1/H2BC12/VDAC1/HUS1/MLEC/SLC3A2/NUBP1/C1QBP/CAPZA1/RPP40/DNAJC10/ARL1/…
GSE39110_DAY3_VS_DAY6_POST_IMMUNIZATION_CD8_TCELL_WITH_IL2_TREATMENT_DN	GSE39110_DAY3_VS_DAY6_POST_IMMUNIZATION_CD8_TCELL_WITH_IL2_TREATMENT_DN	GSE39110_DAY3_VS_DAY6_POST_IMMUNIZATION_CD8_TCELL_WITH_IL2_TREATMENT_DN	199	0.267872	1.41108	0.00271457	0.015698	0.0109619	7022	tags=34%, list=21%, signal=27%	IFT140/TLE1/TBXA2R/CLCF1/BMP1/ALS2CL/SHPK/APP/MYBBP1A/QPCT/PPRC1/SNAI3/EARS2/UTP20/ATN1/DDX5/CYP2S1/ICOSLG/CCR7/TRMT10C/UBQLN2/UST/PDE8A/RPF2/CACNA2D4/ACVR1B/MAP4K3/SERINC1/CRY1/RARG/SGK1/WDR43/TRMT9B/GTPBP6/ST3GAL6/LIG3/HSD11B1/PLEKHM2/AMPD3/KLF6/NDUFA5/CBX7/IMPACT/RIOX1/MAP3K3/VCL/IL7R/PRSS12/RHOBTB2/TRMT13/JMJD1C/KLHL8/BTG2/CRYBG3/GLIPR1/RAB20/SETD6/FAM120B/PRPF6/FNDC10/CLYBL/B4GALT1/PARP16/HS…
GSE30971_CTRL_VS_LPS_STIM_MACROPHAGE_WBP7_HET_2H_DN	GSE30971_CTRL_VS_LPS_STIM_MACROPHAGE_WBP7_HET_2H_DN	GSE30971_CTRL_VS_LPS_STIM_MACROPHAGE_WBP7_HET_2H_DN	198	0.26774	1.41017	0.00238436	0.0141666	0.00989249	8283	tags=40%, list=25%, signal=31%	CASS4/MYCL/STK38L/RCBTB2/C1orf54/IMPA2/AVPI1/FAM13A/EVI2B/SLC22A5/LST1/FCN1/DHRS9/PLIN2/IL1R2/CD300LB/CAMK1/CIAO2A/ALCAM/SHB/SORT1/CALCOCO1/CD1D/PFKFB4/VSIG4/DNMBP/FBXO9/KIAA0513/C5AR2/SLC37A2/SIGLEC16/RMDN2/FUCA2/CD101/RNF135/KIAA0232/TIMM10B/FAM120A/CD1C/CD1E/PLXDC2/HHEX/A2M/FGL2/CD180/CD9/FBP1/MEF2C/NCKIPSD/LPCAT2/GNA13/FOS/ACP5/CLEC7A/CUX2/CISD2/CD84/AP2M1/LINC00900/SORD/SLC46A2/LTA4H/VAMP8/F…
GSE32164_RESTING_DIFFERENTIATED_VS_CMYC_INHIBITED_MACROPHAGE_UP	GSE32164_RESTING_DIFFERENTIATED_VS_CMYC_INHIBITED_MACROPHAGE_UP	GSE32164_RESTING_DIFFERENTIATED_VS_CMYC_INHIBITED_MACROPHAGE_UP	192	0.268558	1.40952	0.0034212	0.0189625	0.0132415	6139	tags=29%, list=18%, signal=24%	TLE1/CBFA2T3/CD19/NKX6-2/ANKRD1/BCL6/POU2AF1/RYR1/LRRC8A/HLA-DOB/RALGPS2/CPNE6/JARID2/CA2/SPIB/TCF4/TACSTD2/PKIG/RALB/EBF1/TUBB6/FGFR4/KLF7/ARHGAP21/ALCAM/SYPL1/MAN1A1/APEX1/MBD4/SNX9/TBC1D23/CLIC4/ZC3H12C/TACR2/MYADM/CXXC5/SPI1/MINDY1/LAMB3/MGAT1/GSN/LDB2/PTPN6/VCL/C5orf51/MYO1E/IQGAP1/EEA1/SELL/GNA12/CD40/MEF2C/CLCN5/CMTM4/LYN
GSE22140_HEALTHY_VS_ARTHRITIC_MOUSE_CD4_TCELL_DN	GSE22140_HEALTHY_VS_ARTHRITIC_MOUSE_CD4_TCELL_DN	GSE22140_HEALTHY_VS_ARTHRITIC_MOUSE_CD4_TCELL_DN	197	0.26784	1.40949	0.00285692	0.0162985	0.0113812	6389	tags=34%, list=19%, signal=28%	RBM38/HMGA1/SERTAD2/PHLDA1/DUSP14/OLR1/KANK1/STK38L/NDRG1/THBD/SERPINE1/SFXN3/TACSTD2/EREG/RPGR/HPCAL1/SLC23A2/IARS1/PLIN2/PLEC/AKAP1/TMEM41B/PLXNB2/ALCAM/ANKRD28/MLX/ARHGEF2/ENG/MINK1/TRAM2/TCTA/PIK3CB/EEF1E1/SLC11A1/SLC16A3/ST3GAL6/ABR/NR1H3/RXRB/AMPD3/ACP2/BAIAP2/ADORA3/BCAR3/CCDC93/GSTO1/ENC1/DNAJC11/LMNA/HHEX/GOLGA2/LYL1/LHFPL2/ARHGAP22/GNA12/ATP6V0A1/LPL/GAS2L1/NEK4/NCOR2/EIF2S3/TNIP1/COG2/…
GSE29618_PDC_VS_MDC_DN	GSE29618_PDC_VS_MDC_DN	GSE29618_PDC_VS_MDC_DN	199	0.267493	1.40908	0.00271457	0.015698	0.0109619	7244	tags=35%, list=22%, signal=28%	PLEKHO1/TIMP1/BCL6/ANXA1/RCBTB2/C1orf54/ITGAX/CREB5/RTN1/IL1RN/PTGS2/ASAP1/LST1/FCN1/PTPN12/HK2/FGR/VDR/LGALS2/BCL2A1/TKT/ITGAM/TRIB1/SH3BP2/IL6R/MAGEF1/ANXA5/CD1A/TMBIM1/CD1D/SQOR/OXA1L/SPG21/CREG1/SGK1/LMO2/SPI1/HLA-DRB6/PKM/NCF2/RAB7A/LGALS3/FCGR2C/IRAK3/CD1C/CD1E/NDST1/ITGB2/LMNA/IQGAP1/LILRA1/SERINC5/CHMP2B/FGL2/NAMPT/CD33/RAD23B/PICALM/RNH1/VDAC1/ENO1/CLEC7A/YBX3/ANXA2P2/PADI2/APOBR/ATP2B1/…
GSE22045_TREG_VS_TCONV_DN	GSE22045_TREG_VS_TCONV_DN	GSE22045_TREG_VS_TCONV_DN	184	0.269269	1.40547	0.00441419	0.0235037	0.0164126	6377	tags=32%, list=19%, signal=26%	HMGA1/AC093642.2/TCF7L2/TOP1MT/POU6F1/TTC4/NFRKB/EIF4G1/DUS4L/SCML1/APP/CTTN/DRICH1/EIF1AX/EDAR/ATP1A1/ADAMTS10/LEF1/PTH2R/SPON1/JMJD8/CCNK/POLR3D/FCGBP/ZNF629/PRKAG2/TP53AIP1/TBC1D23/OCRL/LMLN/CREG1/AL138828.1/DNTT/CD34/FHIT/SLC22A23/SVIL/ZNF24/TMEM150A/DCTN5/CTNND1/PIGP/SEC14L1P1/PRKAG2-AS1/RAB9B/MICU3/GALNT12/LGALS3BP/PPP2R3A/GSTM1/TMEM177/STXBP1/ZNF397/SH3BGR/SLC20A1/CTSL/ACSM3/LRP6/SNTB1
GSE14769_UNSTIM_VS_120MIN_LPS_BMDM_DN	GSE14769_UNSTIM_VS_120MIN_LPS_BMDM_DN	GSE14769_UNSTIM_VS_120MIN_LPS_BMDM_DN	197	0.267011	1.40513	0.00301563	0.0169852	0.0118607	6850	tags=37%, list=21%, signal=29%	CTU1/EGR2/FILIP1L/DUSP14/PDGFB/BCL6/SLC7A11/CSF1/SERPINE1/ATF3/MAP2K3/OTUD1/NDEL1/HLA-B/EDN1/IL1RN/HBEGF/FEM1C/NRIP1/BCL2A1/MAPK6/ADAM17/KLF7/TNFRSF12A/VASP/OAF/TGM2/CLEC4D/SLC31A2/FAM20C/FBXW11/MAP4K3/COQ10B/USP16/HERPUD1/SPRED1/CLIC4/SLC44A1/CCDC71L/SLAMF7/ZNF281/ZNFX1/DNAJA2/CLN5/PCDH7/SLC25A37/GJA1/TBC1D1/CSF2/CD274/FNBP1L/RAB12/BTG2/DYRK2/SPRYD7/SLC15A3/NAMPT/PLAUR/SNX10/VASH1/CLN3/TNIP1/GNA…
GSE15735_CTRL_VS_HDAC_INHIBITOR_TREATED_CD4_TCELL_2H_UP	GSE15735_CTRL_VS_HDAC_INHIBITOR_TREATED_CD4_TCELL_2H_UP	GSE15735_CTRL_VS_HDAC_INHIBITOR_TREATED_CD4_TCELL_2H_UP	197	0.26698	1.40497	0.00301563	0.0169852	0.0118607	7409	tags=37%, list=22%, signal=29%	VPREB3/ARHGAP24/FILIP1L/IGKC/BCL6/ZBTB22/NUAK2/RDH12/ANXA1/HDAC9/TACSTD2/SEMA4B/RASGEF1B/KLHL14/COBLL1/DENND5B/INPPL1/FGR/ST6GAL1/ACSF3/IRGQ/PIKFYVE/GPAT3/ICOSLG/ARHGAP21/SH3BP2/ALCAM/TSPAN17/VARS1/PFKFB4/HVCN1/RAPGEF1/ECPAS/CLIC4/GNAQ/CHD9/POLD4/TYROBP/SH2B3/SLC2A6/MID1IP1/MGAT1/REL/PTPN6/IRAK3/EHD4/BCAR3/SZRD1/MYO1E/DCLK2/NDST1/TRIM35/RABEP2/EFCAB2/FAM43A/CD40/RNH1/EGR3/PLEK/SLC25A19/GNG10/PPM1…
GSE9650_NAIVE_VS_MEMORY_CD8_TCELL_UP	GSE9650_NAIVE_VS_MEMORY_CD8_TCELL_UP	GSE9650_NAIVE_VS_MEMORY_CD8_TCELL_UP	198	0.266752	1.40497	0.00270227	0.0156732	0.0109445	4014	tags=23%, list=12%, signal=21%	GABRR2/RFLNB/RGCC/EGR2/CD19/NDRG1/POU2AF1/HLA-DOB/RALGPS2/BLK/GRK6/JARID2/UBE2R2/RETREG1/TCF4/DUSP6/CCR9/IGF1R/ACTN1/TWSG1/ZFAND5/MS4A1/NRIP1/ST6GAL1/TLR6/NSG2/TNFAIP8L1/MFHAS1/MAP7/SPSB1/IL6R/CCR7/NAB2/ZFR/MRM3/PAN2/CD1D/ENG/GPD2/SLC44A1/CXXC5/DNTT/ZNF281/CANX/RPF1/FNTA
GSE44732_UNSTIM_VS_IL27_STIM_IMATURE_DC_DN	GSE44732_UNSTIM_VS_IL27_STIM_IMATURE_DC_DN	GSE44732_UNSTIM_VS_IL27_STIM_IMATURE_DC_DN	191	0.267637	1.40402	0.00378964	0.0207218	0.01447	5732	tags=29%, list=17%, signal=24%	IGHA1/WDR73/ATF3/TSC22D1/EREG/ABHD5/SNAI3/MCEMP1/HPCAL1/FGR/MRAS/NAA20/POLR3C/PLIN2/CARD14/ADAM17/SIPA1L2/STON2/TTC39B/TBL2/NLRC4/NHSL1/DNAJC5B/SPOCD1/BCCIP/JAKMIP2/CD1D/ENG/IL36B/FHIT/CD52/HSD11B1/NR1H3/PAPSS2/NANS/TGFB1/PHC1/FLVCR2/FKBP15/TMEM53/TTC9/PDIA4/PRAM1/APLP2/IL7R/KCNE1/KLHL21/WFS1/TTC1/STX18/GPCPD1/NEU3/RAB20/TMEM127/MORN2/TMEM230
GSE15930_NAIVE_VS_72H_IN_VITRO_STIM_CD8_TCELL_UP	GSE15930_NAIVE_VS_72H_IN_VITRO_STIM_CD8_TCELL_UP	GSE15930_NAIVE_VS_72H_IN_VITRO_STIM_CD8_TCELL_UP	188	0.268054	1.40287	0.00350931	0.0194288	0.0135671	5664	tags=32%, list=17%, signal=27%	SLC25A25/GABRR2/E2F5/NEURL4/DTX1/TGIF2/ZPR1/SLC7A11/SLC6A8/CA2/APP/CCR9/SPPL2B/CPXM2/HBEGF/NECAP1/RRP9/DVL1/TGM2/HYOU1/ADORA1/POLR3D/SPSB1/IDH3A/TAF1A/TRIM13/CD1D/MAP4K3/METTL1/BSDC1/NDUFAF4/RANBP10/SPR/WDR43/DNAJA2/MAPK8IP3/NFE2L1/SOWAHC/ATP9A/AKIRIN1/SH2B3/PAPSS2/PI4K2A/TNF/MAP3K3/CSF2/SPINK4/POLR1A/AGRN/KLHL21/DNAJC11/SLC30A1/CALR/ZDHHC5/SPRYD7/NFIX/NR1D2/ACVR2A/USP2/NCOA3
GSE9006_HEALTHY_VS_TYPE_1_DIABETES_PBMC_1MONTH_POST_DX_UP	GSE9006_HEALTHY_VS_TYPE_1_DIABETES_PBMC_1MONTH_POST_DX_UP	GSE9006_HEALTHY_VS_TYPE_1_DIABETES_PBMC_1MONTH_POST_DX_UP	199	0.266218	1.40237	0.00279441	0.0159806	0.0111592	8200	tags=38%, list=25%, signal=29%	TOB1/ADNP2/CLN8/BLK/POTEKP/DDX3X/CXCL5/FAM13A/EIF1AX/AAMP/HNRNPH2/ITGB3/TRIM16/MBD2/RBM3/NAPG/ACO2/HSPA9/ANXA5/KLF10/CSDE1/NPTN/CYBB/GSR/ILVBL/MRPS10/BCAP31/PABPC4/HADHA/TRAM1/PSMD2/HNRNPM/DNAJA2/CANX/DPYSL2/TMOD3/PAK2/HSP90B1/MAPK1IP1L/ALDOA/PDIA4/FARSA/HSPA5/SIK1/LAPTM5/GALNT12/RPN1/YWHAZ/GDI2/KPNB1/CORO1C/TMEM9B/BAG1/STAU1/TAP2/RTN3/PSMC3/YBX3/MATR3/GALNT1/SOX4/AZIN1/CLP1/NUS1P3/ASCL2/UGCG/LSM…
GSE19941_IL10_KO_VS_IL10_KO_AND_NFKBP50_KO_UNSTIM_MACROPHAGE_DN	GSE19941_IL10_KO_VS_IL10_KO_AND_NFKBP50_KO_UNSTIM_MACROPHAGE_DN	GSE19941_IL10_KO_VS_IL10_KO_AND_NFKBP50_KO_UNSTIM_MACROPHAGE_DN	191	0.267302	1.40227	0.00386698	0.0210372	0.0146902	5795	tags=30%, list=17%, signal=25%	LARGE1/CABP4/TBKBP1/GEM/ADM/MICALL2/LONRF1/NPR1/GLI3/KPNA7/UFM1/JARID2/COL13A1/KLF9/CYB5D2/TSPAN13/CPEB4/ZNF804A/EBF1/FERMT3/VSIR/ZNF385A/BTBD7/RNF6/SMOX/TOLLIP/PACS2/AQP9/EMP1/AVL9/MADD/DPY19L3/MYOF/SGK1/TLE2/WDFY4/SARAF/KLF6/PGAM1/PI4K2A/GJA1/CRTC3/HLX/SMURF1/RALA/LAPTM5/FAM171A1/LRP12/DNAAF4/MFSD2A/CYRIB/TMEM104/BCL2L2/KIF1A/CUBN/PLAUR/CPD
GSE18148_CBFB_KO_VS_WT_TREG_UP	GSE18148_CBFB_KO_VS_WT_TREG_UP	GSE18148_CBFB_KO_VS_WT_TREG_UP	177	0.27005	1.40178	0.00493899	0.0258601	0.0180581	5961	tags=30%, list=18%, signal=25%	SLC25A32/FAM71D/CCDC141/KLK7/SEMA7A/DUS4L/SGCG/SP5/XKRX/SLC6A12/ILRUN/DPH6/PGC/PNLIPRP1/ELMO2/DMBX1/EMILIN1/CD200/ZCWPW2/CCND1/MFHAS1/ANGEL1/ZBTB40/GJC3/GEMIN5/SELENON/CMAS/MDGA2/THEM5/CRABP2/ZHX1/MGAM/WDR86/GPX3/WFDC2/AK8/PTK6/GPR180/SH3BP5/DUSP28/CFAP52/PCDH7/GJA1/DNAJC5G/KRT72/ACSS2/TRMT13/RCN3/CCL7/PSMD7/SYCE3/MYDGF/DGKI
GSE9878_CTRL_VS_EBF_TRANSDUCED_PAX5_KO_PRO_BCELL_UP	GSE9878_CTRL_VS_EBF_TRANSDUCED_PAX5_KO_PRO_BCELL_UP	GSE9878_CTRL_VS_EBF_TRANSDUCED_PAX5_KO_PRO_BCELL_UP	187	0.267608	1.39938	0.00386891	0.0210372	0.0146902	4927	tags=27%, list=15%, signal=23%	SERTAD2/GSTM2/RHOF/TIE1/CA2/KLF9/DENND2D/IFRD2/SRXN1/ABHD5/EVI2B/RIMBP2/CLDN12/GLRX/DAG1/XKR5/ADAM15/TRIO/RYK/PLEC/VCP/DEF8/TGM2/TTC39B/SELENON/ITPRIP/OGFRL1/FRMD5/ENG/KIAA1522/HPN/MATK/GSR/GPX3/GALNT6/MYOF/BAMBI/CREG1/SUSD6/JPH1/CCDC115/ISLR/EIF3A/GSTM3/NFIC/TMEM150A/ADIPOR2/CLEC4E/SORBS3/GSTO1
GSE37301_MULTIPOTENT_PROGENITOR_VS_PRO_BCELL_DN	GSE37301_MULTIPOTENT_PROGENITOR_VS_PRO_BCELL_DN	GSE37301_MULTIPOTENT_PROGENITOR_VS_PRO_BCELL_DN	177	0.269536	1.39912	0.00530215	0.0273935	0.0191288	8530	tags=44%, list=26%, signal=33%	DECR2/NDRG1/CSF1/IMPA2/LRRC49/TSC22D1/SRXN1/PLCL1/TMX2/RPS6KA1/ARRDC4/DNAJC12/TMEM43/NRIP1/LACTB2/RAB1A/PLIN2/ADAM15/SORBS1/TUBB6/CLPTM1/SYPL1/SLC43A3/PDE8A/FNIP2/DNASE1L1/TFRC/ZHX1/INSR/CEP170/SLC37A2/MTHFD2L/ST3GAL2/AFF4/PIK3CA/FUCA2/DCTD/GTF2IRD1/PI4K2A/CTNND1/EHD4/PGRMC1/LMNA/MOB1B/SERINC5/TPP1/RPN1/SNX12/PTAFR/FBXO30/ABCC3/KIF13A/SLC38A10/SPTLC1/EGR3/COPS2/ERC1/CHST11/FANCC/LIG4/GALNT1/ARHGE…
GSE29618_BCELL_VS_MDC_DN	GSE29618_BCELL_VS_MDC_DN	GSE29618_BCELL_VS_MDC_DN	200	0.264892	1.39644	0.00368088	0.0202636	0.01415	9763	tags=50%, list=29%, signal=36%	PLEKHO1/TOB1/TIMP1/NDRG1/C1orf54/IMPA2/ITGAX/RTN1/TXN/PTGS2/ASAP1/GLRX/FKBP1A/TRIB1/IL6R/CCDC88A/ANXA5/ATP6AP1/CD1D/PEA15/GABARAP/PTTG1IP/VIM/GNAQ/MYOF/RTN4/LMO2/CANX/DPYSL2/AXL/CCT6A/ST3GAL6/PKM/RAB7A/EIF4A1/CD101/RRBP1/GSN/ARPC1B/ACTB/S100A6/CD1C/CD1E/GSTO1/RGS1/ITGB2/LMNA/CD63/FLT3/GRSF1/RAB11FIP1/SLC30A1/GLIPR1/DAB2/TPP1/FBP1/CD33/WDR1/RNF130/MYDGF/SHTN1/PICALM/TUBA1C/ENO1/TGFBI/LCP1/PADI2/AP…
GSE16266_CTRL_VS_LPS_STIM_MEF_DN	GSE16266_CTRL_VS_LPS_STIM_MEF_DN	GSE16266_CTRL_VS_LPS_STIM_MEF_DN	186	0.266539	1.39326	0.00528781	0.0273484	0.0190973	5680	tags=29%, list=17%, signal=24%	CD79A/IFT140/TNFRSF13C/ACTN2/CD19/IL1B/PKP2/CR2/CPNE6/TSPAN9/TPBG/MMP10/MYO15B/SPIB/MYO1C/CYP4F3/CLDN3/MS4A1/CYP2C8/CD79B/KIF17/EBF1/CAMK1/SLIT3/ICOSLG/CBS/SH3BP2/GPLD1/RASA4/SERPINI2/SMAD9/SERPINB2/PHETA2/FOXA1/CLEC4A/MGAT1/HEMK1/TMEM150A/BCAR3/ARMC12/HSPB2/C2orf80/DNAJC11/LMNA/CAVIN4/SELL/LYL1/KLHL11/SRMS/TMEM40/QTRT2/CFAP298/GHR/CD40
GSE45739_NRAS_KO_VS_WT_UNSTIM_CD4_TCELL_UP	GSE45739_NRAS_KO_VS_WT_UNSTIM_CD4_TCELL_UP	GSE45739_NRAS_KO_VS_WT_UNSTIM_CD4_TCELL_UP	196	0.264732	1.39308	0.00386374	0.0210372	0.0146902	6807	tags=36%, list=20%, signal=29%	PLK3/SPHK1/DNAJA3/NR4A3/TWNK/DUSP7/TXLNG/SLC5A6/DDX47/MRTO4/C2CD2L/LONRF3/SNHG4/PTGS2/GSPT1/GPATCH4/UTP18/CNBP/PPAT/NOC3L/PDSS1/YWHAG/LTV1/MAPK6/DCAF13/UBIAD1/IPO4/TNFRSF12A/TRIB1/EIF3B/NAB2/BCCIP/RSL1D1/DIMT1/PEA15/AQP9/NCL/PITPNA/MCRIP2/DDX28/MTRR/PNP/TMEM158/GPSM1/GATAD2A/SH2B3/KLF6/PAICS/CSF2/FARSA/UBE2G2/NETO2/SIK1/KLHL21/ZMPSTE24/LARP4/SRFBP1/QTRT2/JPT2/GFM1/ATG101/EIF2S1/SDF4/C6orf58/NCEH1…
[truncated: 733 more rows]

[truncated: 11 more sheets: Table S5, Table S6, Table S7 , Table S8, Table S9, Table S10,  Table S11, Table S12, Table S13_Subtable S13a, Subtable S13b, Antibodies Table]
